# Supplementary material for: Somatic Mutation Patterns in Hemizygous Genomic Regions Unveil Purifying Selection during Tumor Evolution
Source: PubMed Central journal article supplement (PMC5189942; doi:10.1371/journal.pgen.1006506), 2016-12-27

## Supplementary Figure 6

EXaC loss-of-function intolerant genes

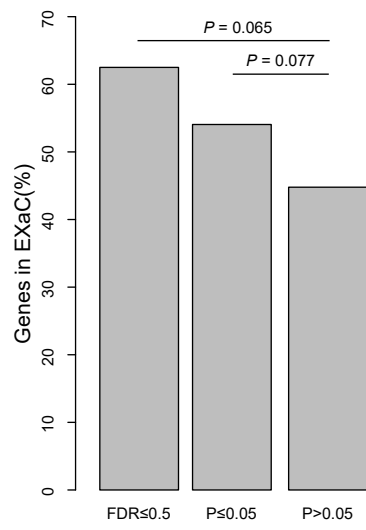

Supplement: pgen.1006506.s006.pdf [file pgen.1006506.s006.pdf]
