# Supplementary material for: Somatic Mutation Patterns in Hemizygous Genomic Regions Unveil Purifying Selection during Tumor Evolution
Source: PLoS Genet. 2016 Dec 27;12(12):e1006506. doi: 10.1371/journal.pgen.1006506 (PMC5189942; doi:10.1371/journal.pgen.1006506)
Supplement: S1 Table — Genes were ranked based on increasing p-values for the CADD scores (p_CADD column in first tab). p-values were calculated using a one-sided Wilcoxon rank sum test to identify genes with lower functional impact scores in the HeZD compared to the CNN state. Different tabs show the results from the main analysis (1), normalized CADD scores (2), analysis focusing on amplified genes (3) and after classifying copy number changes using WGS data (4). (XLSX) [file pgen.1006506.s008.xlsx]

## Sheet: 1) Main analysis
	Number of HeZD samples	Number of CNN samples	Number of mutations in HeZD samples	Number of truncating mutations in HeZD samples	Number of silent mutations in HeZD samples	Number of missense mutations in HeZD samples	Number of mutations in CNN samples	Number of truncating mutations in CNN samples	Number of silent mutations in CNN samples	Number of missense mutations in CNN samples	p_trunc	p_miss	p_CADD	p_PP2	p_MA	p_SIFT	q_CADD	q_PP2	q_MA	q_SIFT	dNdS_HeZD	dNdS_CNN	p_dNdS_HeZD	p_dNdS_CNN
INTS10	2300	4782	13	0	9	4	45	6	7	32	0.0229987	0.00115567	0.000160428	8.16933e-06	0.000648433	0.000292477	0.190428	0.00969699	0.158268	0.130771	0.15709	1.81776	0.00139144	0.955887
BRPF1	1477	5816	15	0	10	5	105	9	25	71	0.0739865	0.00293492	0.000352769	0.000508682	0.000467307	0.00269891	0.209369	0.150951	0.158268	0.291237	0.181389	1.10285	0.00135501	0.699984
SMG1	520	6272	14	1	11	2	291	29	69	188	0.106495	4.11893e-05	0.00104565	0.00147928	0.000491618	0.00106209	0.290009	0.292651	0.158268	0.252141	0.0861263	0.947389	2.63386e-05	0.37101
KIF20B	1553	5987	34	3	13	18	158	31	26	99	0.0109943	0.0162739	0.00108969	0.00118982	0.00066667	0.000328455	0.290009	0.282462	0.158268	0.130771	0.408034	1.2241	0.0128123	0.849957
RTTN	1892	5548	12	0	6	5	136	20	33	82	0.0724103	0.0798169	0.00130084	0.0141709	0.0105723	0.00713095	0.290009	0.579451	0.587558	0.471991	0.283755	0.938971	0.0369763	0.411827
UPF2	1016	5948	11	0	6	5	124	21	18	83	0.0165249	0.0117494	0.00146593	0.00039818	0.000348543	0.00163668	0.290009	0.150951	0.158268	0.277534	0.246327	1.49438	0.0222355	0.957968
SORL1	1393	5954	68	2	30	36	266	19	65	179	0.0313377	0.00310751	0.00251656	0.0060151	0.00269186	0.0132044	0.389981	0.475995	0.319524	0.588587	0.48713	1.14238	0.00296172	0.840253
BRD1	1664	5683	13	0	7	5	122	11	20	90	0.0703655	0.0045614	0.00262835	0.00279851	0.00137678	0.014753	0.389981	0.369093	0.233463	0.599826	0.297551	1.93706	0.0347256	0.998498
ACACA	921	6102	17	0	8	9	281	39	57	184	0.0195957	0.0366643	0.00296549	0.0233885	0.0108899	0.00874794	0.391116	0.658799	0.587558	0.471991	0.376916	1.19908	0.0410983	0.90205
SNX25	1490	6029	17	1	6	10	78	8	11	59	0.198893	0.0573349	0.00404516	0.00461864	0.00323622	0.0614654	0.454643	0.461705	0.349217	0.737297	0.534335	1.86531	0.171021	0.985232
REV3L	1548	5853	45	3	4	38	297	62	42	193	0.313319	0.948958	0.00421321	0.0181247	0.0152402	0.065291	0.454643	0.598844	0.627492	0.737297	2.69224	1.48444	0.990348	0.994066
MYO5A	1149	6355	14	0	7	7	164	26	36	101	0.0298676	0.0633393	0.00525693	0.00191263	0.001861	0.00800167	0.466936	0.298401	0.276127	0.471991	0.339743	1.15135	0.0411561	0.796861
RSF1	726	6256	10	1	7	2	143	22	28	93	0.0929675	0.0014685	0.00559427	0.0119982	0.00120887	0.00237102	0.466936	0.57649	0.233463	0.28144	0.122554	1.08256	0.00169063	0.677968
POLR2A	2262	5283	38	0	15	21	174	14	46	114	0.0309384	0.0960828	0.0058344	0.00201113	0.022332	0.0023594	0.466936	0.298401	0.679695	0.28144	0.568421	1.05034	0.0689076	0.639873
PRICKLE2	1650	5821	16	0	7	9	95	10	28	57	0.148184	0.28774	0.00634931	0.00818276	0.0184605	0.00589952	0.466936	0.568436	0.627492	0.471991	0.461021	0.845205	0.101741	0.260962
PRPF8	2105	5392	46	0	17	29	209	7	55	144	0.169658	0.142478	0.00637691	0.054646	0.162095	0.0454657	0.466936	0.658799	0.815281	0.727131	0.671253	1.05885	0.126288	0.666687
STXBP5	1500	5919	18	0	10	8	107	9	26	72	0.0796777	0.0172804	0.00680102	0.000474214	0.00243477	0.00760939	0.466936	0.150951	0.319524	0.471991	0.255605	0.946231	0.00423323	0.441143
ASCC3	1524	5881	32	0	9	23	215	42	29	144	0.000702938	0.104581	0.00807703	0.00980476	0.00413837	0.00052036	0.466936	0.568436	0.409354	0.154417	0.788309	1.78699	0.334162	0.999217
MST1R	1802	5713	17	0	7	10	97	9	22	66	0.123673	0.142914	0.00808672	0.0155648	0.0626942	0.0394385	0.466936	0.587141	0.718126	0.727131	0.59612	1.34669	0.209413	0.911916
TLR4	1147	6120	28	1	12	15	201	16	40	145	0.107203	0.0124741	0.00827885	0.00972874	0.0270963	0.0326527	0.466936	0.568436	0.683965	0.727131	0.503242	1.48142	0.0566635	0.991227
BUD13	1423	5943	13	1	7	5	55	4	6	45	0.22549	0.00147898	0.00830951	0.0114712	0.0517318	0.000330509	0.466936	0.57649	0.705812	0.130771	0.242486	2.21605	0.0121966	0.98574
AP2A2	1280	6190	10	0	3	7	84	13	17	54	0.208944	0.469477	0.00913293	0.0683105	0.110937	0.129594	0.466936	0.687157	0.774604	0.751849	1.08765	1.64518	0.66358	0.977592
NEURL4	2262	5278	24	0	9	15	147	15	36	96	0.0599442	0.217204	0.00924309	0.0181621	0.0868434	0.0471151	0.466936	0.598844	0.719874	0.727131	0.714537	1.25044	0.275239	0.896051
TTC3	999	6247	20	1	7	12	220	34	34	152	0.0467979	0.0582144	0.009441	0.0135113	0.0180937	0.0695856	0.466936	0.577145	0.627492	0.737297	0.546571	1.41094	0.148815	0.975476
PPIP5K2	1335	5897	17	1	8	8	112	13	27	72	0.194752	0.0649652	0.0113027	0.0487482	0.0360451	0.0256322	0.524481	0.658799	0.683965	0.691486	0.263836	0.732877	0.00916374	0.104466
PPP1R13B	1261	5999	11	0	6	5	98	22	25	50	0.0320715	0.151142	0.0114882	0.0105355	0.0277187	0.0147529	0.524481	0.568436	0.683965	0.599826	0.319638	0.889873	0.0551795	0.351672
SREBF2	1599	5781	12	1	7	4	110	12	28	65	0.294037	0.0323936	0.0119487	0.0332392	0.0337774	0.0390668	0.525302	0.658799	0.683965	0.727131	0.244258	1.02283	0.0213989	0.578365
PI4KA	1300	5968	17	0	7	10	207	16	56	134	0.190865	0.228789	0.0131341	0.0266045	0.0511057	0.0252699	0.55679	0.658799	0.705812	0.691486	0.599477	1.06407	0.212592	0.67832
MINK1	2139	5386	17	1	7	8	88	6	26	54	0.569387	0.220745	0.0147133	0.010127	0.0129939	0.0385272	0.602229	0.568436	0.59322	0.727131	0.472498	0.906378	0.117412	0.378328
MYH10	2248	5309	48	2	15	29	196	18	41	132	0.105147	0.113762	0.0152593	0.0554169	0.00702796	0.00776719	0.603761	0.658799	0.527021	0.471991	0.669242	1.20734	0.136763	0.875848
MON1B	1612	5628	17	0	7	10	62	5	15	41	0.192048	0.201289	0.0158318	0.0222481	0.118682	0.0459886	0.606206	0.658799	0.775507	0.727131	0.58672	1.14997	0.20058	0.724798
SYNJ2	1581	5851	23	1	10	12	149	29	41	77	0.0355453	0.2347	0.0182122	0.00897912	0.0295472	0.0213758	0.67556	0.568436	0.683965	0.667712	0.502729	0.817446	0.083484	0.170296
EIF2AK4	1345	6213	19	0	8	11	128	17	38	70	0.0673741	0.369111	0.0196778	0.033825	0.106303	0.00874377	0.676329	0.658799	0.751079	0.471991	0.487422	0.708977	0.0971618	0.0538215
INTS9	2184	4855	11	0	6	5	46	3	13	30	0.363636	0.125353	0.0197117	0.0675385	0.0318208	0.072056	0.676329	0.685199	0.683965	0.737297	0.34923	1.03157	0.0730416	0.593373
CTCF	1482	5736	20	4	5	11	152	56	16	79	0.0459896	0.154149	0.0203956	0.0581906	0.50202	0.521015	0.676329	0.671384	0.948231	0.960846	0.786651	1.98554	0.41038	0.997982
USP31	543	6271	10	0	5	5	158	12	30	115	0.211633	0.0471173	0.0208521	0.0393912	0.0075479	0.0162584	0.676329	0.658799	0.527021	0.603086	0.380234	1.53361	0.111466	0.988309
RAPGEF6	1216	5935	11	1	2	8	97	21	11	64	0.305882	0.475041	0.0210819	0.00494175	0.0153711	0.00192851	0.676329	0.461705	0.627492	0.28144	1.12312	1.83784	0.679427	0.984001
ST5	1193	6290	10	1	5	4	126	20	29	77	0.24796	0.0848459	0.0225582	0.0259131	0.0279847	0.024016	0.682333	0.658799	0.683965	0.678739	0.400456	1.21518	0.127225	0.84486
ARHGEF12	1405	5944	21	0	8	13	159	17	29	113	0.0371065	0.0681668	0.0233131	0.033882	0.0614411	0.0181022	0.682333	0.658799	0.718126	0.613922	0.491125	1.32356	0.0916979	0.931033
LRP4	807	6552	13	0	6	7	164	11	48	104	0.312682	0.218195	0.0233279	0.0146449	0.0259939	0.0599324	0.682333	0.579451	0.683965	0.737297	0.451214	0.870198	0.125037	0.236027
DDX24	1299	5987	11	0	7	4	81	10	17	52	0.0643362	0.0142812	0.0235684	0.0158286	0.00676407	0.0129742	0.682333	0.587141	0.527021	0.588587	0.202807	1.25263	0.00994352	0.828803
YLPM1	1361	5999	42	10	12	20	236	58	38	138	0.14885	0.0471499	0.0242998	0.083275	0.177686	0.0873203	0.686758	0.714607	0.820658	0.737297	0.566854	1.23813	0.0811974	0.900691
ATP2C2	1648	5589	12	0	6	6	64	10	14	39	0.0652773	0.107194	0.027368	0.0121417	0.00911925	0.069166	0.710429	0.57649	0.587558	0.737297	0.457603	1.40549	0.141192	0.897377
FIG4	1547	5850	18	0	6	12	77	4	14	59	0.287973	0.162489	0.0276257	0.113336	0.189847	0.057716	0.710429	0.773163	0.820658	0.737297	0.654957	1.47365	0.271232	0.930972
AHI1	1437	5929	14	1	4	9	83	26	12	45	0.0555871	0.336697	0.0277283	0.0319098	0.0327592	0.0371887	0.710429	0.658799	0.683965	0.727131	0.614749	1.20673	0.298592	0.766124
FARP1	1223	5666	18	1	8	9	150	18	43	88	0.232815	0.185415	0.0281594	0.115148	0.0565194	0.00142864	0.710429	0.777741	0.718126	0.277534	0.500247	0.902771	0.11199	0.31731
CUL9	525	6263	13	0	7	6	266	22	64	176	0.140378	0.0403019	0.0283883	0.030478	0.00736044	0.0093946	0.710429	0.658799	0.527021	0.484843	0.346518	1.17491	0.0507452	0.882514
AARS	1483	5719	12	0	6	6	78	7	21	50	0.220097	0.144161	0.0326704	0.0244493	0.0420716	0.0397797	0.710429	0.658799	0.705812	0.727131	0.401214	0.993482	0.0973875	0.534121
CHD4	505	6093	21	0	6	15	264	30	49	176	0.0662843	0.317817	0.0331792	0.0573368	0.0591889	0.0172408	0.710429	0.671384	0.718126	0.613922	0.83724	1.30541	0.437144	0.961809
CHD1	1364	5878	31	2	6	23	147	33	21	86	0.0619405	0.541366	0.0334813	0.00493364	0.0128564	0.00779727	0.710429	0.461705	0.59322	0.471991	0.908338	1.11709	0.490552	0.712488
TRIP12	807	6579	21	3	8	10	222	48	48	125	0.132988	0.115161	0.0340148	0.0310374	0.0168845	0.0315788	0.710429	0.658799	0.627492	0.727131	0.439255	0.902913	0.0623954	0.294334
PCNX	1383	6009	27	2	9	16	240	25	51	163	0.270207	0.139863	0.0345458	0.0174729	0.0327395	0.0630987	0.710429	0.598844	0.683965	0.737297	0.662953	1.17642	0.210276	0.865412
GUCY1A3	1362	6215	15	0	7	7	127	13	22	92	0.0578531	0.0165851	0.0347707	0.0439747	0.0202538	0.0608751	0.710429	0.658799	0.666068	0.737297	0.347064	1.60912	0.0445996	0.986754
HSPA4	1213	5944	11	1	4	6	73	11	12	49	0.266667	0.153783	0.0357502	0.104622	0.140074	0.202297	0.710429	0.766585	0.795539	0.816758	0.506562	1.35083	0.219239	0.86462
UPF1	579	6527	13	0	8	5	132	10	41	81	0.203375	0.0480522	0.036476	0.0278858	0.0724423	0.0698933	0.710429	0.658799	0.718857	0.737297	0.28932	0.993568	0.025319	0.519501
LLGL1	2028	5443	21	0	8	11	70	6	16	48	0.125659	0.124878	0.0371225	0.0407181	0.0652611	0.0733466	0.710429	0.658799	0.718126	0.737297	0.62164	1.41282	0.212885	0.91283
CSGALNACT1	2288	4789	12	0	7	5	33	4	11	18	0.186603	0.197027	0.0372536	0.0552061	0.0472831	0.158999	0.710429	0.658799	0.705812	0.779886	0.2825	0.719091	0.0284888	0.242589
PNPLA6	1008	6298	10	0	6	4	148	8	56	84	0.468856	0.181398	0.0372969	0.0412724	0.0640764	0.0403636	0.710429	0.658799	0.718126	0.727131	0.307124	0.723935	0.0596421	0.0369853
MDN1	1472	5922	74	4	20	50	528	59	126	342	0.0943531	0.436037	0.0373793	0.0507098	0.0251282	0.108691	0.710429	0.658799	0.683965	0.737297	0.900048	1.04676	0.387577	0.687629
GEMIN5	1089	6016	20	0	8	12	117	12	30	75	0.0910885	0.222793	0.0384393	0.0134092	0.0340164	0.0231238	0.710429	0.577145	0.683965	0.669462	0.510045	0.940749	0.109282	0.42241
DHX34	926	6178	13	0	6	7	147	10	38	96	0.273319	0.153604	0.0394271	0.134376	0.0576227	0.0634721	0.710429	0.782988	0.718126	0.737297	0.517148	1.17817	0.180435	0.829814
ALS2	516	6726	12	0	5	7	167	16	49	102	0.261299	0.359311	0.0397106	0.0886604	0.0102063	0.0891514	0.710429	0.730709	0.587558	0.737297	0.473983	0.753121	0.163751	0.0613761
RBM25	1365	6011	12	0	3	9	90	9	16	64	0.295788	0.470152	0.0399562	0.0982742	0.0490489	0.029438	0.710429	0.75259	0.705812	0.727131	0.77663	1.11641	0.461568	0.695523
NUP98	1267	6207	17	0	4	13	185	20	28	136	0.132829	0.351167	0.0416394	0.0765773	0.0275536	0.0695849	0.710429	0.708606	0.683965	0.737297	1.03272	1.66824	0.614941	0.996591
DDX17	1500	5835	15	2	4	9	83	26	11	45	0.0992477	0.296452	0.0422241	0.0168278	0.0500232	0.0336411	0.710429	0.598844	0.705812	0.727131	0.742566	1.41013	0.409499	0.884172
ENPP1	1453	5939	15	1	5	9	25	3	4	18	0.342657	0.213824	0.043103	0.0554846	0.105483	0.0546775	0.710429	0.658799	0.749747	0.737297	0.593105	1.64751	0.252152	0.880356
EXPH5	1389	5955	13	0	7	6	148	14	36	98	0.121883	0.04685	0.0441349	0.0495066	0.0618477	0.027425	0.710429	0.658799	0.718126	0.723411	0.241009	0.843532	0.0118752	0.214252
RAP1GDS1	1272	6351	11	0	4	7	66	3	13	49	0.491228	0.227064	0.0442895	0.0465789	0.0392115	0.186986	0.710429	0.658799	0.700332	0.815549	0.52647	1.20336	0.236569	0.768114
ZNF292	1457	5939	39	5	10	24	307	66	55	186	0.100551	0.258546	0.0443435	0.0435913	0.0318472	0.0325414	0.710429	0.658799	0.683965	0.727131	0.780014	1.10305	0.307406	0.762618
WDR7	1874	5594	36	3	12	21	179	29	44	106	0.123191	0.275723	0.0450553	0.221894	0.0481161	0.0339013	0.710429	0.872142	0.705812	0.727131	0.632733	0.885326	0.136405	0.271402
SNW1	1305	6046	11	1	6	4	50	7	9	34	0.189572	0.0219726	0.0455897	0.0215565	0.0127823	0.00434073	0.710429	0.658799	0.59322	0.429371	0.185624	1.17562	0.00987407	0.722921
LARS	1111	6018	11	1	3	7	114	12	18	83	0.501876	0.285419	0.0462268	0.212271	0.13053	0.284655	0.710429	0.863091	0.775721	0.877635	0.697115	1.44402	0.413833	0.94266
ABLIM1	1447	6048	14	1	7	6	98	5	21	72	0.562471	0.0239205	0.0487083	0.282114	0.182709	0.110809	0.710429	0.892785	0.820658	0.737297	0.306854	1.27856	0.0322082	0.868437
DYM	1798	5652	11	1	6	4	58	8	14	35	0.273171	0.0636111	0.0489345	0.0631584	0.0590998	0.01977	0.710429	0.681536	0.718126	0.634242	0.291454	1.02425	0.0405501	0.582055
TNRC6A	516	6268	15	0	5	10	247	35	39	162	0.0481867	0.166502	0.0494899	0.046857	0.0245047	0.0332835	0.710429	0.658799	0.683965	0.727131	0.557286	1.2789	0.213413	0.932962
SEC31A	1202	6371	17	0	5	12	123	26	28	69	0.0474067	0.585082	0.0498522	0.0289121	0.0854764	0.0414041	0.710429	0.658799	0.719874	0.727131	0.729184	0.90063	0.361409	0.350531
SETD1A	439	6324	12	0	6	6	196	14	56	123	0.281195	0.153334	0.0504492	0.0908875	0.100925	0.195562	0.710429	0.730709	0.730475	0.815549	0.396804	0.899895	0.0942436	0.27976
MACF1	937	6299	20	0	7	13	559	49	123	386	0.101826	0.197075	0.0508972	0.0663327	0.0560713	0.0883676	0.710429	0.685199	0.718126	0.737297	0.653212	1.19817	0.247397	0.966624
TTLL5	1345	6016	13	0	4	8	116	17	21	78	0.113017	0.268587	0.051127	0.0650089	0.144557	0.0477493	0.710429	0.685199	0.799931	0.727131	0.666955	1.42919	0.351475	0.947838
PCDH1	1113	6027	23	0	10	13	143	13	36	93	0.0648807	0.107147	0.0518553	0.17167	0.0672482	0.0564482	0.710429	0.821	0.718126	0.737297	0.555886	1.15216	0.119027	0.792954
NUP214	1163	6095	18	0	7	11	202	22	52	125	0.0981099	0.278905	0.0532124	0.0495329	0.160723	0.0896584	0.710429	0.658799	0.812457	0.737297	0.566	0.921233	0.1753	0.333958
SPG7	1626	5586	11	1	5	5	99	14	32	52	0.435358	0.344395	0.0533208	0.0665908	0.015543	0.139031	0.710429	0.685199	0.627492	0.75702	0.440708	0.729923	0.16057	0.0992796
USP8	1173	6340	18	0	5	13	111	17	25	69	0.092902	0.561657	0.0534025	0.00573477	0.0129729	0.0195602	0.710429	0.475995	0.59322	0.634242	0.729163	0.886214	0.357426	0.33491
ARID5B	1188	6218	32	3	11	18	136	28	30	78	0.0617624	0.201303	0.0552473	0.0672248	0.0401201	0.0786709	0.710429	0.685199	0.700332	0.737297	0.673354	1.1955	0.196002	0.828922
BRD4	566	6484	13	0	6	7	168	14	46	103	0.224068	0.202819	0.0569931	0.0810838	0.0324492	0.108357	0.710429	0.714607	0.683965	0.737297	0.456002	0.934663	0.128818	0.379224
OSBPL1A	1235	6004	11	0	5	6	88	15	14	58	0.0417889	0.0690149	0.0571696	0.0136142	0.0436904	0.0552425	0.710429	0.577145	0.705812	0.737297	0.376435	1.38923	0.0974347	0.897378
SENP6	1230	6119	10	0	3	7	95	14	17	61	0.190508	0.406063	0.0573801	0.0926945	0.0633722	0.0736785	0.710429	0.733522	0.718126	0.737297	0.649584	1.06444	0.376292	0.633263
PDE4D	1363	5939	16	1	4	11	67	7	8	51	0.306502	0.196506	0.0573886	0.00505658	0.507442	0.0584925	0.710429	0.461705	0.948231	0.737297	0.911248	2.27812	0.53471	0.994541
LRP5	529	6417	16	0	8	8	197	9	70	117	0.401257	0.232362	0.0577907	0.0542407	0.0507995	0.0824491	0.710429	0.658799	0.705812	0.737297	0.508564	0.886355	0.133574	0.231959
NOC3L	1519	6036	13	0	5	8	82	12	15	55	0.0769903	0.165894	0.0581244	0.0384495	0.00973344	0.102918	0.710429	0.658799	0.587558	0.737297	0.499597	1.29063	0.176724	0.847272
ZC3H13	1692	5396	22	3	2	17	225	75	25	125	0.382517	0.847436	0.0584789	0.0415555	0.0358263	0.0845403	0.710429	0.658799	0.683965	0.737297	2.16922	1.57148	0.92249	0.989369
VPS53	2096	5389	18	1	7	10	69	13	14	42	0.0778137	0.162062	0.0587788	0.0207808	0.0185023	0.0840847	0.710429	0.658799	0.627492	0.737297	0.638946	1.51024	0.244071	0.93886
CHD9	1347	5845	40	5	9	26	245	29	33	181	0.327461	0.106081	0.0590912	0.126492	0.212594	0.128614	0.710429	0.782988	0.820658	0.751849	0.825818	1.59265	0.36935	0.996373
ING1	1161	5675	11	0	5	6	56	7	14	35	0.176771	0.229369	0.0594985	0.109483	0.0563244	0.186061	0.710429	0.76717	0.718126	0.815549	0.516625	1.23006	0.212412	0.790835
MAP3K1	1292	5982	15	4	4	7	192	75	24	89	0.122083	0.214411	0.06021	0.0238438	0.0173191	0.00765247	0.710429	0.658799	0.627492	0.471991	0.552356	1.55186	0.259316	0.984019
FAM178A	1515	6019	17	0	5	12	101	16	20	64	0.0708969	0.415478	0.0613198	0.0231264	0.0849345	0.0177329	0.710429	0.658799	0.719874	0.613922	0.723479	1.10029	0.356119	0.686039
TRRAP	302	5503	14	0	7	7	412	22	134	256	0.355003	0.177476	0.0617326	0.0410119	0.0798487	0.0988793	0.710429	0.658799	0.718857	0.737297	0.424002	0.838512	0.0900813	0.05504
INVS	1211	6100	10	0	4	6	83	14	18	51	0.124183	0.285083	0.0618805	0.181551	0.128828	0.208597	0.710429	0.825921	0.775507	0.829224	0.491855	1.02014	0.217008	0.573824
BTBD7	1294	5997	16	1	4	11	133	36	23	74	0.0957543	0.512821	0.0621171	0.0606202	0.057189	0.286335	0.710429	0.676503	0.718126	0.877635	0.993525	1.20951	0.590622	0.820849
FBN1	1216	6314	51	1	16	33	406	29	87	289	0.0639917	0.101569	0.0622608	0.122934	0.156715	0.12869	0.710429	0.782988	0.812457	0.751849	0.665369	1.12289	0.119337	0.845095
CDC27	778	6183	23	3	2	18	178	65	32	81	0.542413	0.985133	0.0624991	0.071042	0.128411	0.305532	0.710429	0.691465	0.775507	0.877635	2.47997	0.809435	0.949917	0.176215
HTT	1195	6204	31	2	15	14	310	26	99	173	0.303909	0.0797338	0.0626797	0.143576	0.0732217	0.244312	0.710429	0.800117	0.718857	0.871455	0.403188	0.753432	0.0112385	0.0145107
USP6NL	1016	5955	17	0	4	13	74	8	16	50	0.23663	0.636042	0.0628875	0.239642	0.297154	0.205411	0.710429	0.885152	0.900725	0.826518	1.17755	1.22284	0.700893	0.798685
FN1	701	6643	30	1	10	19	346	31	93	222	0.213261	0.357069	0.0650997	0.0616305	0.130703	0.0765342	0.710429	0.676503	0.775721	0.737297	0.709026	0.979074	0.244312	0.451669
ESCO1	1084	6124	12	3	2	7	74	22	9	41	0.489963	0.536201	0.0654019	0.0658092	0.0670158	0.0412905	0.710429	0.685199	0.718126	0.727131	1.38051	1.65661	0.768698	0.947856
CXXC1	1851	5627	21	0	5	15	79	6	12	59	0.183898	0.300212	0.0655227	0.0535094	0.0295433	0.00802673	0.710429	0.658799	0.683965	0.471991	1.02012	1.7002	0.600234	0.971325
DIAPH1	1111	6033	17	1	8	7	101	8	25	62	0.366736	0.0597164	0.065639	0.0083485	0.0352618	0.0679083	0.710429	0.568436	0.683965	0.737297	0.288725	0.831527	0.0165196	0.251526
CNOT1	1456	5790	25	2	7	16	290	40	47	199	0.155414	0.152418	0.0659837	0.147382	0.231153	0.151315	0.710429	0.815001	0.834696	0.771071	0.848115	1.5228	0.429736	0.997398
RPAP1	1340	6210	19	1	6	12	128	16	28	83	0.243947	0.322173	0.066598	0.0464412	0.145811	0.264294	0.710429	0.658799	0.799931	0.877635	0.827271	1.40341	0.437886	0.956572
PLEKHG1	1511	5906	21	2	6	13	148	17	37	94	0.5323	0.476681	0.0672634	0.0487976	0.254175	0.112296	0.710429	0.658799	0.866972	0.737297	0.902027	0.965413	0.497502	0.459925
ATG2A	563	6639	13	0	6	7	194	12	72	109	0.412537	0.430273	0.0676962	0.0515008	0.0532461	0.251046	0.710429	0.658799	0.718126	0.873416	0.548167	0.756993	0.208492	0.0387552
NID2	1141	6153	24	0	8	16	194	21	42	131	0.0504627	0.235687	0.0683909	0.0322928	0.050298	0.0155701	0.710429	0.658799	0.705812	0.599826	0.765223	1.26626	0.337371	0.925249
ZC3H18	1626	5595	16	4	4	8	151	55	26	69	0.258369	0.447567	0.069057	0.062122	0.0513228	0.109308	0.710429	0.676503	0.705812	0.737297	0.821027	1.13681	0.473769	0.748231
IKBKAP	1170	6126	12	1	5	6	126	11	30	85	0.513966	0.154066	0.0691348	0.136391	0.0770523	0.102535	0.710429	0.784825	0.718857	0.737297	0.422143	1.06708	0.131741	0.654653
LAMA1	1211	5877	16	2	9	5	154	7	49	98	0.840945	0.0239674	0.0692884	0.0942485	0.0756267	0.0225982	0.710429	0.736006	0.718857	0.669462	0.30246	0.833309	0.0162712	0.166842
ACOX3	1197	6227	11	0	3	8	89	6	24	59	0.536107	0.667032	0.0694374	0.14968	0.122647	0.19311	0.710429	0.815001	0.775507	0.815549	1.10154	1.06712	0.667192	0.645932
TCERG1	1104	6027	11	0	2	8	186	46	45	92	0.252688	0.887611	0.0700254	0.0965375	0.0927519	0.200995	0.710429	0.744091	0.726371	0.816264	1.09921	0.653416	0.669345	0.0123538
RRP12	1519	6022	21	2	11	8	119	7	33	77	0.615441	0.0194258	0.0707267	0.0797758	0.0694826	0.127905	0.711033	0.713381	0.718857	0.751849	0.380056	1.14017	0.0261492	0.767411
FXR2	2270	5274	15	2	5	8	62	15	11	32	0.173599	0.285053	0.0715731	0.103542	0.0642378	0.167847	0.711033	0.76338	0.718126	0.790613	0.639748	1.13087	0.295161	0.692553
VPS13D	1377	6057	31	0	11	20	453	47	119	287	0.0298178	0.295478	0.071882	0.0326998	0.0457261	0.0760516	0.711033	0.658799	0.705812	0.737297	0.664954	0.946582	0.1844	0.322559
NEDD4	1145	6380	12	1	5	6	107	7	28	71	0.668594	0.199537	0.0735032	0.357411	0.400053	0.378967	0.715508	0.907654	0.948231	0.922112	0.330421	0.727713	0.0673774	0.0960912
VPRBP	1816	5730	19	0	5	14	96	11	28	57	0.21854	0.795433	0.07354	0.132198	0.111917	0.197856	0.715508	0.782988	0.775507	0.815549	0.921682	0.728881	0.525047	0.103481
TBC1D4	1419	5578	23	0	10	13	146	23	45	78	0.0232443	0.343767	0.0741812	0.0942101	0.193695	0.0952165	0.715879	0.736006	0.820658	0.737297	0.473976	0.729194	0.0616064	0.0528793
SLIT3	1077	5983	31	1	14	16	139	10	43	85	0.240506	0.129579	0.0770952	0.12495	0.0909425	0.0843536	0.733134	0.782988	0.726371	0.737297	0.534276	1.00021	0.0641578	0.532813
MYCBP2	1386	5595	52	1	13	38	415	42	87	283	0.039373	0.437097	0.0772045	0.0406317	0.100537	0.307804	0.733134	0.658799	0.730475	0.877635	0.917564	1.07576	0.446796	0.743649
ACIN1	1070	6174	12	2	5	5	163	30	34	98	0.304807	0.102214	0.0786193	0.120644	0.067626	0.17682	0.736678	0.782988	0.718126	0.806298	0.318915	1.00364	0.0689171	0.539809
MAN1B1	1123	6043	11	0	6	5	49	5	13	31	0.201581	0.115315	0.0803418	0.139834	0.147127	0.166666	0.736678	0.787015	0.799931	0.790193	0.369027	1.09005	0.0863194	0.657529
KIAA0100	811	6157	15	2	5	8	197	19	48	130	0.68843	0.27455	0.0803867	0.117274	0.137377	0.344805	0.736678	0.777741	0.795531	0.887816	0.644204	1.02894	0.299292	0.595219
IARS	1202	6117	13	1	5	7	91	10	19	60	0.370968	0.172325	0.080693	0.0877373	0.0540224	0.0437292	0.736678	0.730709	0.718126	0.727131	0.562595	1.23993	0.232247	0.829019
MYO1C	2090	5402	19	0	10	9	79	7	25	47	0.124761	0.123143	0.0812376	0.0418528	0.128904	0.0655163	0.736678	0.658799	0.775507	0.737297	0.417249	0.945765	0.0467174	0.45225
RNF123	1793	5726	30	2	10	18	130	5	32	92	0.77953	0.202734	0.0816244	0.233158	0.182164	0.0344467	0.736678	0.885152	0.820658	0.727131	0.781145	1.28835	0.328663	0.911661
ELAC2	2235	5315	12	0	7	5	66	5	21	39	0.27716	0.117987	0.0822843	0.0614835	0.0987885	0.275966	0.736678	0.676503	0.730475	0.877635	0.277176	0.739136	0.0264564	0.162419
PITRM1	1041	5901	11	0	4	6	91	7	27	57	0.426268	0.430461	0.0825427	0.1323	0.0976569	0.244713	0.736678	0.782988	0.730475	0.871455	0.598604	0.916381	0.311483	0.390929
EPB41L2	1441	5950	25	1	8	15	133	10	27	93	0.29908	0.160519	0.0832622	0.0555012	0.0478002	0.0374943	0.737554	0.658799	0.705812	0.727131	0.640435	1.25241	0.211299	0.874318
PTPRK	1463	5934	33	2	9	22	216	25	53	137	0.288389	0.52457	0.0849724	0.154515	0.232259	0.10553	0.746714	0.818703	0.83543	0.737297	0.835952	0.944304	0.388423	0.385446
SH3BP4	860	6497	15	1	5	9	133	10	36	86	0.625771	0.419473	0.0855545	0.0404666	0.204636	0.109707	0.746714	0.658799	0.820658	0.737297	0.995644	1.28604	0.592816	0.917619
RNF145	1094	6003	20	1	6	13	83	11	12	59	0.125057	0.137019	0.0865134	0.180803	0.0395984	0.1422	0.749572	0.825921	0.700332	0.767231	0.802585	1.77715	0.40692	0.980482
UHRF1BP1L	588	6524	12	2	3	7	159	32	28	97	0.455383	0.413312	0.08725	0.0722339	0.0794335	0.19527	0.750392	0.691465	0.718857	0.815549	0.652401	1.07846	0.37855	0.671561
PDCD11	1517	6023	25	0	11	13	184	15	55	114	0.0885902	0.14613	0.0881587	0.0503461	0.361766	0.182333	0.750392	0.658799	0.936362	0.808483	0.505358	0.964068	0.0735027	0.438452
CPE	1369	6183	11	0	3	8	73	8	12	53	0.256917	0.372876	0.0885045	0.0265143	0.119196	0.0899705	0.750392	0.658799	0.775507	0.737297	0.966261	1.84193	0.593141	0.985701
N4BP2L2	1517	5554	12	0	4	8	104	13	9	82	0.0478261	0.0432833	0.0900465	0.0649561	0.0640749	0.0783162	0.758051	0.685199	0.718126	0.737297	0.48584	2.48318	0.193465	0.998943
FRAS1	1092	6417	13	0	4	9	172	19	39	114	0.221226	0.447139	0.0908446	0.164182	0.0913311	0.338507	0.758465	0.821	0.726371	0.887816	0.820381	1.15929	0.473257	0.813681
ATP13A2	1390	6095	14	1	5	7	128	4	34	88	0.870005	0.244872	0.0919258	0.0509541	0.020762	0.0399855	0.758465	0.658799	0.666068	0.727131	0.648802	1.24036	0.321518	0.879967
NUP205	461	5480	10	0	5	5	201	23	47	131	0.150582	0.10704	0.0933401	0.0704776	0.049127	0.0133882	0.758465	0.691465	0.705812	0.588587	0.316027	0.988424	0.0671361	0.499984
ZFYVE26	1383	5989	33	2	10	21	236	16	57	163	0.509788	0.291537	0.0934101	0.131887	0.184519	0.17088	0.758465	0.782988	0.820658	0.795215	0.855825	1.11629	0.403654	0.785181
LARP1B	1277	6331	12	0	4	8	84	15	17	52	0.101604	0.376588	0.0937496	0.0467076	0.0860981	0.0552393	0.758465	0.658799	0.719874	0.737297	0.503586	0.903493	0.208488	0.399183
C15orf39	981	6423	11	1	4	6	107	15	20	72	0.322975	0.180615	0.0939296	0.148465	0.143995	0.116712	0.758465	0.815001	0.799931	0.737297	0.584717	1.4423	0.299172	0.945871
KDM4C	1806	5367	20	1	8	11	101	8	29	64	0.42831	0.252937	0.0953001	0.0375558	0.120971	0.126761	0.759654	0.658799	0.775507	0.751849	0.487337	0.773017	0.0927706	0.147344
TNS1	703	6634	16	1	8	5	247	14	66	152	0.52955	0.0237755	0.0953567	0.179915	0.0911707	0.111399	0.759654	0.825921	0.726371	0.737297	0.313362	0.981235	0.0283142	0.474027
PXDN	386	6628	19	1	8	10	339	31	110	198	0.390002	0.304628	0.0963328	0.166557	0.142328	0.201294	0.759797	0.821	0.799931	0.816264	0.556014	0.83301	0.158305	0.0695009
PAPD4	1434	5906	11	3	5	3	55	12	5	38	0.128105	0.00449694	0.0975024	0.201113	0.154979	0.0920165	0.759797	0.862439	0.812457	0.737297	0.227861	2.56344	0.0300733	0.992474
KIAA0753	2216	5324	20	2	8	10	79	9	17	53	0.335297	0.0835629	0.0984109	0.205229	0.138714	0.0705816	0.759797	0.863091	0.795531	0.737297	0.428454	1.04479	0.0596699	0.607437
SAFB2	1122	6220	14	1	4	8	101	25	30	45	0.271725	0.772696	0.0989849	0.0900516	0.0501258	0.157657	0.759797	0.730709	0.705812	0.776512	0.775385	0.562872	0.436856	0.010526
CAMTA1	1442	5959	26	0	10	16	274	19	86	169	0.151326	0.387854	0.100002	0.117284	0.245284	0.100182	0.759797	0.777741	0.861398	0.737297	0.671411	0.86854	0.214461	0.157077
DDX60L	1377	6172	25	1	6	17	163	18	37	108	0.301053	0.566722	0.100501	0.0756018	0.0997344	0.155763	0.759797	0.708606	0.730475	0.776512	0.935206	0.977332	0.521727	0.482811
AKAP11	1677	5415	28	1	5	22	147	22	28	97	0.202236	0.752623	0.100602	0.262007	0.176599	0.0345885	0.759797	0.891122	0.820658	0.727131	1.31318	1.12151	0.777348	0.736633
BRD8	1116	6023	15	0	5	10	128	17	28	80	0.112016	0.37128	0.100623	0.170896	0.0368777	0.33123	0.759797	0.821	0.683965	0.887816	0.605517	0.983965	0.256965	0.505687
EHMT1	1122	6054	14	0	6	8	158	6	55	97	0.55639	0.410682	0.101136	0.147784	0.18494	0.133786	0.759797	0.815001	0.820658	0.75621	0.549082	0.733773	0.198979	0.0415224
MAP3K5	1434	5937	25	2	10	13	167	16	43	107	0.36103	0.118001	0.102679	0.0478475	0.0260214	0.0856483	0.763883	0.658799	0.683965	0.737297	0.511036	1.0017	0.081525	0.53378
FAM179B	1128	6164	22	1	5	16	177	21	32	123	0.264429	0.463503	0.103452	0.257065	0.121617	0.221101	0.763883	0.887024	0.775507	0.846602	1.05888	1.3236	0.626149	0.938973
MPHOSPH8	1461	5645	16	1	1	14	73	6	10	57	0.862745	0.908227	0.104391	0.0582582	0.701832	0.080129	0.763883	0.671384	0.986255	0.737297	4.80018	1.92007	0.98823	0.985735
ANKRD12	1213	5889	27	3	7	17	218	41	44	129	0.225864	0.431561	0.104455	0.0497343	0.073347	0.0477811	0.763883	0.658799	0.718857	0.727131	0.656398	0.835415	0.23315	0.169384
MICAL3	1347	5948	24	3	7	13	195	23	50	117	0.61732	0.408081	0.104897	0.0766919	0.192608	0.107817	0.763883	0.708606	0.820658	0.737297	0.705996	0.973189	0.300374	0.463538
NOP14	1195	6199	11	0	4	7	86	12	17	56	0.146261	0.277445	0.107557	0.163783	0.332121	0.115562	0.778475	0.821	0.927191	0.737297	0.643133	1.29707	0.339421	0.860388
NFKB2	1506	6022	11	0	6	5	63	8	16	39	0.125659	0.101404	0.10864	0.0794212	0.100452	0.122109	0.780951	0.713381	0.730475	0.751849	0.361927	1.11293	0.0814414	0.688767
LCP2	1067	5978	11	0	5	6	58	10	16	30	0.119763	0.371761	0.110841	0.139899	0.113997	0.149487	0.780951	0.787015	0.775507	0.771071	0.404596	0.737544	0.118108	0.195171
PAM	1335	5893	16	0	3	13	99	11	22	65	0.322129	0.806944	0.111126	0.346375	0.5	0.471641	0.780951	0.905784	0.948231	0.958965	1.2755	0.896417	0.740469	0.367242
TM9SF3	1531	6027	13	2	4	7	63	20	11	32	0.166203	0.357973	0.111703	0.44084	0.48602	0.279162	0.780951	0.931098	0.948231	0.877635	0.564524	0.997081	0.27006	0.553873
MANBA	1273	6349	13	0	3	10	75	6	17	51	0.438462	0.678075	0.114905	0.302931	0.143142	0.15346	0.780951	0.894017	0.799931	0.776512	1.10745	1.07488	0.66553	0.646743
POLG	863	6374	14	1	4	7	135	12	37	69	0.653249	0.58198	0.116307	0.0990429	0.221353	0.189244	0.780951	0.753615	0.820658	0.815549	0.68442	0.782195	0.375251	0.132559
WDFY3	1208	6374	42	4	14	24	414	44	87	281	0.247096	0.0590394	0.116611	0.0689247	0.093649	0.215828	0.780951	0.687509	0.726371	0.837559	0.588581	1.14415	0.0812766	0.878992
ABCC1	512	6277	14	0	8	6	176	15	71	88	0.234369	0.267087	0.117247	0.0917234	0.169705	0.111201	0.780951	0.730709	0.820658	0.737297	0.355042	0.640076	0.0468259	0.00310339
NUP88	2170	5367	16	0	6	9	52	1	12	39	0.684211	0.175292	0.117633	0.0527917	0.0588038	0.0452242	0.780951	0.658799	0.718126	0.727131	0.51637	1.14749	0.162103	0.711878
GAS7	2251	5302	11	1	5	5	74	4	21	49	0.759398	0.181942	0.118082	0.208849	0.521204	0.606038	0.780951	0.863091	0.948231	1	0.394027	0.956924	0.122135	0.476883
CDK5RAP2	1144	6114	17	0	6	11	184	22	42	119	0.0935928	0.290806	0.118951	0.077128	0.0952604	0.087302	0.780951	0.708606	0.72951	0.737297	0.657778	1.13616	0.279237	0.788904
CLMN	1301	5984	12	2	3	7	118	17	25	76	0.682883	0.484967	0.119217	0.344208	0.633119	0.591822	0.780951	0.905784	0.986255	0.991147	1.06876	1.14001	0.647554	0.749659
MBTPS1	1646	5596	12	0	4	8	118	7	39	72	0.535866	0.662153	0.119737	0.173605	0.21576	0.221841	0.780951	0.821	0.820658	0.846704	0.772821	0.743097	0.441131	0.0819419
SACS	1465	5640	52	4	10	38	506	77	99	327	0.206524	0.704467	0.119825	0.0721996	0.114759	0.434347	0.780951	0.691465	0.775507	0.944364	1.23227	1.10839	0.772416	0.832743
PKD2	1229	6365	12	0	4	8	94	17	12	65	0.044477	0.139573	0.1215	0.0842839	0.0331094	0.0542729	0.780951	0.714607	0.683965	0.737297	0.754039	2.45063	0.425674	0.999564
WDR59	1563	5653	13	0	3	10	105	17	31	56	0.287347	0.888843	0.122371	0.228394	0.136745	0.0675159	0.780951	0.875672	0.795531	0.737297	1.25869	0.779573	0.735391	0.152572
PRKCD	1795	5712	13	1	7	5	74	14	22	38	0.156313	0.141592	0.12267	0.116202	0.109602	0.0288917	0.780951	0.777741	0.769808	0.727131	0.293223	0.746387	0.032858	0.166561
FBXO18	1011	5916	10	0	4	6	125	15	36	72	0.267963	0.456739	0.123056	0.167493	0.253618	0.15736	0.780951	0.821	0.866972	0.776512	0.633215	0.961549	0.341969	0.456657
LIG1	912	6175	11	0	5	6	114	5	31	77	0.50306	0.20612	0.12323	0.270277	0.274033	0.355803	0.780951	0.892785	0.898158	0.894783	0.519114	1.13033	0.214655	0.750399
AP3B1	1432	5912	15	1	4	10	118	26	18	69	0.117385	0.360651	0.123335	0.233834	0.453959	0.239907	0.780951	0.885152	0.948231	0.870857	0.735643	1.27511	0.398139	0.854713
HSPG2	1433	6083	43	2	15	26	385	39	129	215	0.225247	0.608006	0.123605	0.237625	0.0879374	0.143235	0.780951	0.885152	0.719874	0.767373	0.786962	0.830604	0.279034	0.0515749
MAPK6	1158	6351	10	0	1	9	65	7	11	47	0.631579	0.877535	0.123984	0.395037	0.428691	0.509783	0.780951	0.913995	0.948231	0.958965	2.38094	1.22654	0.904359	0.775983
MAML3	1248	6319	15	3	9	3	128	19	39	63	0.438054	0.0167181	0.124343	0.106671	0.0746583	0.0742617	0.780951	0.76717	0.718857	0.737297	0.118669	0.648113	0.000582499	0.020833
BAZ1A	1068	6123	12	2	4	6	137	25	26	85	0.38747	0.211452	0.125102	0.103369	0.230886	0.146939	0.780951	0.76338	0.834696	0.771071	0.482675	1.05022	0.198726	0.622583
CHD3	2267	5284	42	5	9	26	221	33	43	139	0.4088	0.470294	0.126169	0.134566	0.482666	0.367558	0.780951	0.782988	0.948231	0.910906	1.19051	1.27165	0.733155	0.931684
ALS2CL	1758	5753	12	1	5	6	63	5	19	38	0.656174	0.328925	0.126349	0.168907	0.204325	0.135811	0.780951	0.821	0.820658	0.756843	0.512546	0.921684	0.208745	0.431999
PTPN23	1772	5743	19	0	5	14	121	16	28	73	0.124463	0.647751	0.126632	0.154801	0.196245	0.115189	0.780951	0.818703	0.820658	0.737297	1.15237	1.17589	0.690088	0.799603
DSP	658	6104	20	2	8	10	302	33	69	198	0.340377	0.0781125	0.127254	0.0834777	0.0486838	0.305109	0.780951	0.714607	0.705812	0.877635	0.495761	1.15482	0.103222	0.867327
RUNX1	997	6281	11	2	2	7	86	27	12	46	0.393023	0.60615	0.128167	0.526402	0.160184	0.450998	0.780951	0.955217	0.812457	0.948438	1.59526	2.165	0.826274	0.997086
FKBP15	1143	6123	19	4	8	7	89	8	27	50	0.863925	0.148744	0.128524	0.378161	0.411684	0.230887	0.780951	0.911538	0.948231	0.858603	0.392881	0.672586	0.0486827	0.0629837
PLCB2	1346	6214	15	1	6	8	69	5	21	43	0.62361	0.336705	0.131235	0.0907682	0.045231	0.0857634	0.780951	0.730709	0.705812	0.737297	0.552242	0.887531	0.201851	0.369575
SMTN	1444	5875	14	4	3	7	110	21	15	73	0.633896	0.267737	0.131827	0.0776064	0.147467	0.486643	0.780951	0.708606	0.799931	0.958965	0.943369	2.12932	0.584308	0.998742
NUP93	1428	5806	11	0	5	6	81	6	24	51	0.365814	0.288487	0.132335	0.108393	0.155042	0.149476	0.780951	0.76717	0.812457	0.771071	0.461028	0.896444	0.163671	0.367022
NBEAL2	1761	5750	29	3	9	17	209	10	56	141	0.892664	0.329047	0.132838	0.111462	0.125231	0.057755	0.780951	0.769218	0.775507	0.737297	0.867569	1.13094	0.434155	0.804324
HSPH1	1467	5598	15	0	5	10	83	13	21	49	0.11425	0.510923	0.133087	0.0831837	0.0310955	0.113276	0.780951	0.714607	0.683965	0.737297	0.598165	0.811796	0.250241	0.243065
FAM193A	1198	6192	19	3	5	11	139	26	28	83	0.430236	0.403691	0.133743	0.0391869	0.0459373	0.182949	0.780951	0.658799	0.705812	0.808483	0.917882	1.08431	0.524355	0.679111
CYFIP2	1102	6010	34	4	16	14	174	8	52	113	0.860256	0.0194314	0.134153	0.170926	0.186788	0.0625692	0.780951	0.821	0.820658	0.737297	0.491154	0.9991	0.0301496	0.526646
CTNNA1	1106	6028	15	3	6	6	109	20	16	72	0.206666	0.0221443	0.134291	0.0914591	0.192966	0.0578122	0.780951	0.730709	0.820658	0.737297	0.549088	1.92181	0.190698	0.99629
SPIRE1	1170	5940	11	0	4	7	55	4	19	32	0.504558	0.648079	0.134366	0.137526	0.13976	0.268081	0.780951	0.784825	0.795539	0.877635	0.652958	0.706962	0.348006	0.14118
EIF4A1	2271	5275	11	0	2	9	36	5	9	22	0.458333	0.866245	0.134507	0.657274	0.357159	0.410315	0.780951	0.996691	0.936362	0.93552	1.64538	1.0563	0.837003	0.619708
ERBB3	384	6542	14	2	4	8	195	7	32	151	0.916052	0.159869	0.134874	0.185797	0.102607	0.218921	0.780951	0.829587	0.733702	0.843699	0.827159	1.79218	0.478618	0.999468
PHKB	1202	5934	15	1	7	7	116	11	32	73	0.386478	0.124467	0.136369	0.102575	0.214521	0.143519	0.785776	0.76338	0.820658	0.767373	0.370366	0.800048	0.0510458	0.168937
NDN	1172	6288	10	1	6	3	78	4	28	46	0.786957	0.0974982	0.137771	0.109799	0.128707	0.155151	0.790022	0.76717	0.775507	0.776512	0.311624	0.818012	0.0624051	0.231549
WDR11	1426	6037	17	2	8	7	111	12	34	65	0.518287	0.12919	0.138754	0.167778	0.087582	0.116775	0.791832	0.821	0.719874	0.737297	0.350333	0.731578	0.0335732	0.0839472
CCDC88B	626	6662	14	0	6	8	122	8	37	76	0.338514	0.317909	0.139917	0.132992	0.170937	0.0949086	0.794646	0.782988	0.820658	0.737297	0.548213	0.877882	0.198192	0.287166
DENND5A	1195	6290	12	0	5	7	127	17	32	78	0.137833	0.277171	0.141091	0.180606	0.0744113	0.134624	0.795026	0.825921	0.718857	0.756843	0.537218	1.04326	0.218921	0.615289
PPP3CA	1276	6351	14	0	1	13	65	13	12	40	0.5	0.968946	0.141323	0.158197	0.157178	0.112334	0.795026	0.821	0.812457	0.737297	4.25582	1.36404	0.981028	0.869702
PTPRF	922	6336	19	0	9	10	238	7	76	153	0.473933	0.158498	0.143112	0.162603	0.22477	0.405274	0.798649	0.821	0.828579	0.93552	0.48784	0.912774	0.0920262	0.277962
TTC37	1388	5901	18	2	6	10	130	16	22	92	0.314495	0.0951777	0.143392	0.12864	0.0934287	0.20653	0.798649	0.782988	0.726371	0.828212	0.574079	1.34387	0.195527	0.917864
DENND4C	1895	5379	26	1	7	18	124	17	25	81	0.132439	0.409232	0.144887	0.127336	0.0162062	0.107192	0.798649	0.782988	0.627492	0.737297	0.782856	1.01524	0.360078	0.563228
DHX30	1778	5732	15	2	4	8	138	10	27	99	0.795857	0.26842	0.145188	0.200039	0.145722	0.23082	0.798649	0.862439	0.799931	0.858603	1.07872	1.67802	0.649178	0.995407
KIAA1598	1449	6058	11	0	2	9	56	9	13	34	0.380435	0.848427	0.145331	0.159221	0.289497	0.646676	0.798649	0.821	0.898158	1	1.39055	0.927036	0.772497	0.45935
PCM1	2259	4805	25	3	8	14	96	17	16	63	0.147155	0.101366	0.146766	0.0266253	0.119825	0.0453647	0.802818	0.658799	0.775507	0.727131	0.474907	1.17144	0.0752755	0.755597
INO80	1334	6214	20	1	3	16	152	22	29	100	0.439929	0.830535	0.149437	0.136678	0.133836	0.30506	0.807995	0.784825	0.790365	0.877635	1.74417	1.31941	0.882014	0.927363
MYO5C	1160	6347	11	2	4	5	117	19	23	74	0.462603	0.165401	0.150126	0.17632	0.0790363	0.100802	0.807995	0.821	0.718857	0.737297	0.612809	1.35503	0.312757	0.923904
NPC1	1205	6012	10	0	5	5	135	11	37	87	0.296433	0.165685	0.150222	0.129319	0.169527	0.196712	0.807995	0.782988	0.820658	0.815549	0.410734	0.999082	0.135507	0.531624
SERPINA3	1304	5992	10	0	4	6	84	5	29	50	0.554359	0.547499	0.150435	0.352416	0.340008	0.256006	0.807995	0.905784	0.930272	0.877635	0.67066	0.832544	0.374454	0.246275
ABCA2	1124	6043	19	1	8	10	211	12	77	122	0.659194	0.405015	0.152429	0.208839	0.29671	0.387748	0.814675	0.863091	0.900725	0.928298	0.705169	0.84587	0.297664	0.138962
MAPK8IP3	688	6122	14	1	8	5	134	6	48	78	0.740225	0.0906221	0.153154	0.154617	0.264501	0.19427	0.814675	0.818703	0.881919	0.815549	0.27817	0.741787	0.0214501	0.0628184
IQGAP2	1438	5901	28	3	6	19	178	25	42	110	0.563473	0.726664	0.154369	0.277226	0.289603	0.274829	0.814675	0.892785	0.898158	0.877635	1.20364	0.984799	0.724794	0.495351
KIAA0368	1154	6132	16	1	5	10	155	15	41	99	0.509136	0.475191	0.154425	0.216386	0.3482	0.392719	0.814675	0.863091	0.932988	0.930161	0.680107	0.904044	0.326	0.319543
NEDD4L	1880	5582	18	0	6	12	87	9	18	57	0.121524	0.296774	0.155281	0.127418	0.0799403	0.054938	0.815006	0.782988	0.718857	0.737297	0.664986	1.14525	0.280925	0.733252
NFATC1	1921	5493	22	0	10	12	96	2	32	62	0.593023	0.223165	0.15586	0.055094	0.0942385	0.0764025	0.815006	0.658799	0.726371	0.737297	0.572555	0.939347	0.138237	0.42427
CHST15	1411	6038	18	3	9	6	105	11	29	63	0.590703	0.0345457	0.157825	0.20126	0.207545	0.0603872	0.82166	0.862439	0.820658	0.737297	0.378055	0.982616	0.03897	0.507002
SPTBN2	485	6534	17	0	6	11	239	13	62	164	0.337257	0.328362	0.159808	0.0344306	0.0599096	0.299305	0.826386	0.658799	0.718126	0.877635	0.793542	1.20079	0.410634	0.905817
DSC2	1482	5849	11	0	4	7	99	12	13	74	0.100206	0.094923	0.160143	0.0620192	0.14826	0.16594	0.826386	0.676503	0.799931	0.790193	0.558448	2.01287	0.264692	0.996064
GEMIN4	2096	5389	15	0	6	9	70	5	25	37	0.378008	0.619449	0.161909	0.210632	0.101787	0.178649	0.826386	0.863091	0.73225	0.806298	0.689851	0.717445	0.323781	0.122488
CIT	547	6520	13	0	2	11	244	13	71	158	0.719015	0.942765	0.162147	0.583636	0.908574	0.731858	0.826386	0.977554	1	1	2.0643	0.893383	0.906664	0.23265
RABEP1	2166	5370	10	2	4	4	71	15	13	41	0.328092	0.13474	0.162214	0.214454	0.288148	0.342641	0.826386	0.863091	0.898158	0.887816	0.442464	1.22529	0.174714	0.786636
PDS5B	1521	5556	19	1	2	16	147	37	20	90	0.30152	0.861293	0.163311	0.18531	0.254059	0.120019	0.8273	0.829587	0.866972	0.751849	2.24984	1.40615	0.929961	0.938194
NFIB	1853	5352	14	3	5	6	59	9	11	38	0.527536	0.120412	0.163787	0.116928	0.264469	0.0660256	0.8273	0.777741	0.881919	0.737297	0.529291	1.26308	0.202471	0.800223
NEBL	1020	6042	14	1	6	6	115	7	32	75	0.648406	0.138715	0.16688	0.194078	0.296898	0.0441887	0.829556	0.843849	0.900725	0.727131	0.38228	0.829411	0.0759932	0.213329
TBP	1567	5821	15	0	5	3	101	1	18	15	0.791667	0.50033	0.167664	0.247241	0.210172	0.278802	0.829556	0.885152	0.820658	0.877635	0.210374	0.311665	0.0319893	0.000719531
IKZF2	687	6628	10	0	2	8	43	7	8	28	0.330882	0.706694	0.168115	0.418454	0.100476	0.391808	0.829556	0.917985	0.730475	0.930161	1.23787	1.27655	0.72377	0.786076
RERE	1435	5981	15	2	5	7	205	37	44	120	0.322017	0.214768	0.171081	0.109514	0.155298	0.130209	0.829556	0.76717	0.812457	0.751849	0.564386	1.17275	0.243574	0.840646
IRS1	774	6602	15	1	6	7	173	25	46	98	0.250996	0.227548	0.171862	0.248799	0.0865813	0.13246	0.829556	0.885152	0.719874	0.752294	0.462911	0.897069	0.134348	0.297216
PLK2	1316	5962	12	1	2	9	83	18	18	46	0.519751	0.856147	0.17256	0.214525	0.287666	0.328991	0.829556	0.863091	0.898158	0.887816	1.64562	0.89595	0.837155	0.390001
TMEM175	1198	6164	11	0	5	6	66	1	19	44	0.8	0.252743	0.172782	0.172491	0.0750012	0.102529	0.829556	0.821	0.718857	0.737297	0.649529	1.25348	0.334795	0.830358
PKD1	667	6134	24	0	11	13	322	16	117	189	0.260286	0.299009	0.173797	0.256812	0.138101	0.120992	0.829556	0.887024	0.795531	0.751849	0.584452	0.836907	0.134316	0.0719226
PDZD8	1447	6062	19	2	5	11	114	15	29	70	0.570812	0.542091	0.174385	0.172032	0.114516	0.308095	0.829556	0.821	0.775507	0.877635	0.9679	1.00128	0.564217	0.53904
FUK	1481	5726	19	1	9	9	74	5	25	42	0.52596	0.239244	0.175696	0.238735	0.134901	0.155497	0.829556	0.885152	0.792707	0.776512	0.450486	0.792856	0.0727543	0.210544
EEF2	1259	6131	13	1	6	6	104	8	37	58	0.650988	0.331877	0.176208	0.136913	0.0638632	0.0719032	0.829556	0.784825	0.718126	0.737297	0.556289	0.798994	0.215991	0.164594
MEF2C	1426	5899	19	0	8	11	66	6	15	45	0.114235	0.127908	0.177444	0.0376566	0.0222206	0.0462441	0.829556	0.658799	0.679695	0.727131	0.472428	1.07656	0.0867217	0.645613
PELP1	2136	5381	24	0	8	15	89	11	21	57	0.0558112	0.313839	0.177762	0.0270027	0.00511428	0.0108787	0.829556	0.658799	0.466973	0.538041	0.744202	1.09622	0.318512	0.681268
PTPRE	1409	6025	15	0	6	9	80	4	30	46	0.507452	0.593501	0.178283	0.383859	0.701963	0.580036	0.829556	0.911538	0.986255	0.989999	0.640851	0.712057	0.276452	0.0894717
TYRO3	1338	6210	18	1	6	11	71	4	18	49	0.652933	0.341846	0.178332	0.243939	0.0985814	0.470968	0.829556	0.885152	0.730475	0.958965	0.838405	1.18774	0.448297	0.774041
AQR	1287	6241	17	1	2	14	164	13	29	121	0.775546	0.842787	0.178467	0.3459	0.193299	0.0828048	0.829556	0.905784	0.820658	0.737297	2.19433	1.31155	0.923881	0.925014
TUBGCP2	1424	6000	20	1	8	11	107	9	41	56	0.522394	0.601702	0.178632	0.207293	0.329771	0.252386	0.829556	0.863091	0.927191	0.873416	0.684641	0.728665	0.276389	0.0733005
AKAP6	1079	6131	11	1	5	5	69	0	17	52	1	0.100831	0.179021	0.332544	0.328085	0.16105	0.829556	0.905784	0.927191	0.780319	0.37248	0.949458	0.0946603	0.472495
BCL9L	1381	5958	30	1	6	23	175	48	36	89	0.0350905	0.868992	0.179341	0.0799324	0.0840639	0.260997	0.829556	0.713381	0.719874	0.877635	1.59781	1.08836	0.895285	0.697947
KARS	1573	5655	11	0	3	8	59	4	12	43	0.469556	0.479803	0.179706	0.375681	0.192773	0.131466	0.829556	0.911538	0.820658	0.751849	0.971554	1.42697	0.596287	0.89767
RANBP6	1809	5357	15	1	5	9	101	13	17	68	0.227585	0.16618	0.18037	0.0470274	0.0861778	0.0222652	0.829556	0.658799	0.719874	0.669462	0.591301	1.26956	0.243986	0.84503
CBL	1392	5959	25	0	7	18	96	7	28	55	0.249256	0.780401	0.180509	0.347594	0.282833	0.212001	0.829556	0.905784	0.898158	0.836031	0.878181	0.71962	0.46008	0.0959855
CROCC	1388	6087	22	2	11	9	211	13	63	134	0.620693	0.0367782	0.181461	0.0517139	0.0698648	0.112503	0.829556	0.658799	0.718857	0.737297	0.391546	0.98446	0.0270728	0.484861
MSR1	2256	4802	20	0	5	15	85	10	19	56	0.152751	0.61514	0.181744	0.381869	0.382166	0.271284	0.829556	0.911538	0.948231	0.877635	0.941612	1.07377	0.539276	0.648606
KDM6B	2273	5277	33	3	9	20	157	18	37	92	0.440287	0.48164	0.184907	0.465863	0.289802	0.424639	0.829556	0.936971	0.898158	0.944364	0.898596	1.03824	0.463896	0.609134
ABCA7	1310	6053	29	3	13	13	207	14	73	118	0.746392	0.173702	0.184982	0.306881	0.399713	0.311053	0.829556	0.89851	0.948231	0.879096	0.510948	0.818917	0.0612543	0.100414
ABCA1	1187	6121	32	4	10	18	242	27	49	166	0.430845	0.105242	0.187174	0.171653	0.284941	0.177756	0.829556	0.821	0.898158	0.806298	0.823419	1.47039	0.372042	0.994384
ULK2	1853	5517	14	1	2	11	87	17	17	53	0.520849	0.857196	0.188048	0.303529	0.0877	0.150721	0.829556	0.894017	0.719874	0.771071	1.8709	1.20057	0.879463	0.784957
CMYA5	1430	5911	19	0	6	13	66	9	12	45	0.0627141	0.261449	0.189727	0.0335203	0.0382481	0.160747	0.829556	0.658799	0.698469	0.780319	0.606759	1.21352	0.221011	0.771486
RBL2	1355	5843	11	2	1	8	114	35	17	62	0.703831	0.886176	0.189901	0.710497	0.27885	0.791952	0.829556	0.998286	0.898158	1	2.92058	1.45074	0.93982	0.939121
CNTROB	2266	5285	13	2	5	6	95	14	22	58	0.475166	0.189673	0.191368	0.266853	0.209791	0.18322	0.829556	0.892785	0.820658	0.808483	0.507053	1.05362	0.19213	0.623975
SMC3	1464	6047	18	0	3	14	112	13	13	83	0.153257	0.4461	0.191612	0.0898921	0.191446	0.124782	0.829556	0.730709	0.820658	0.751849	1.26753	1.94309	0.736674	0.994547
RUSC2	1324	5847	22	0	4	18	127	10	30	86	0.341625	0.850707	0.191842	0.405158	0.696656	0.325972	0.829556	0.913995	0.986255	0.887816	1.76144	1.16124	0.90412	0.789711
UNC13B	1321	5877	20	1	5	14	140	6	31	102	0.752361	0.484339	0.192409	0.163586	0.0838913	0.0393581	0.829556	0.821	0.719874	0.727131	1.16983	1.34594	0.699999	0.942885
LAMC3	1166	6093	10	1	6	3	77	5	22	50	0.640284	0.0407407	0.192471	0.204257	0.124928	0.122695	0.829556	0.863091	0.775507	0.751849	0.290651	1.05031	0.050057	0.619371
WDR36	1325	5874	13	1	2	10	98	11	16	71	0.653202	0.687399	0.193747	0.0763733	0.0789002	0.54315	0.829556	0.708606	0.718857	0.97569	1.62142	1.49244	0.831919	0.949047
CTDP1	1921	5493	17	2	7	8	80	4	24	50	0.85959	0.221999	0.196582	0.236873	0.41483	0.188315	0.829556	0.885152	0.948231	0.815549	0.50382	0.832703	0.134762	0.266447
DOCK1	1405	6031	18	0	8	10	188	8	62	115	0.402627	0.291688	0.197509	0.217409	0.226296	0.162689	0.829556	0.863091	0.830814	0.781827	0.506168	0.783744	0.116582	0.0710997
ELL2	1381	5897	13	1	3	9	65	11	8	46	0.26087	0.316742	0.19863	0.109873	0.17147	0.578244	0.829556	0.76717	0.820658	0.989999	1.02061	2.06674	0.618414	0.987261
SMC2	1184	6122	12	0	2	10	122	27	19	75	0.18617	0.736637	0.199055	0.0826846	0.121063	0.0768888	0.829556	0.714607	0.775507	0.737297	1.44505	1.26252	0.787652	0.850798
DOPEY1	1388	5995	18	3	5	10	234	31	41	160	0.536029	0.192229	0.199232	0.280417	0.0433621	0.0156652	0.829556	0.892785	0.705812	0.599826	0.804509	1.35846	0.426548	0.970977
TMEM2	1214	6134	23	0	7	16	155	6	31	118	0.329334	0.217331	0.200154	0.24664	0.347452	0.156475	0.829556	0.885152	0.932988	0.776512	0.772707	1.31952	0.357439	0.932662
FYCO1	1743	5762	15	1	6	8	153	13	42	97	0.499049	0.246616	0.200591	0.327256	0.165546	0.245196	0.829556	0.905784	0.820658	0.871455	0.503978	0.971958	0.159275	0.468674
HR	2313	4771	14	0	4	10	62	5	20	37	0.447392	0.7782	0.201166	0.37414	0.648579	0.181604	0.829556	0.911538	0.986255	0.808483	1.00026	0.760196	0.6001	0.195985
RANBP3	1085	6249	11	1	4	6	56	8	10	38	0.327231	0.185827	0.201175	0.141494	0.316707	0.0767094	0.829556	0.792234	0.927191	0.737297	0.691907	1.5815	0.381671	0.932916
PTCH1	1218	6098	14	2	6	6	174	26	43	101	0.386943	0.132338	0.201212	0.130606	0.178297	0.161717	0.829556	0.782988	0.820658	0.780319	0.506511	1.09043	0.171064	0.712475
ARAP1	671	6307	13	1	4	8	152	14	42	96	0.641862	0.531902	0.201469	0.216412	0.424788	0.453045	0.829556	0.863091	0.948231	0.948438	0.879276	1.06769	0.524002	0.669344
ARHGAP5	1085	6132	21	5	4	11	171	48	34	88	0.566015	0.644347	0.20193	0.162528	0.205356	0.114838	0.829556	0.821	0.820658	0.737297	0.897037	0.860506	0.51844	0.251081
FBLN2	1500	5821	22	1	6	15	114	10	32	70	0.500436	0.68936	0.203893	0.501215	0.493938	0.519516	0.829556	0.94954	0.948231	0.960846	1.09486	0.962279	0.653426	0.463976
RAD50	1214	5938	24	1	6	17	117	22	20	74	0.0693021	0.402255	0.203935	0.252031	0.0338961	0.131748	0.829556	0.885152	0.683965	0.751849	0.758311	1.12408	0.354777	0.717323
GOLGA4	1601	5842	21	2	5	14	188	25	28	133	0.304193	0.252056	0.204236	0.280737	0.208515	0.0835782	0.829556	0.892785	0.820658	0.737297	0.846827	1.45548	0.456338	0.976452
TCF4	1876	5588	26	2	6	18	120	13	28	79	0.532322	0.6372	0.206881	0.410412	0.449502	0.257382	0.829556	0.913995	0.948231	0.877635	1.11686	1.01714	0.666988	0.567029
RHOT1	930	6115	11	0	4	7	52	7	11	33	0.186603	0.342022	0.206924	0.341208	0.202636	0.3252	0.829556	0.905784	0.820658	0.887816	0.553374	1.06363	0.260214	0.626154
CD109	1208	6133	14	0	3	11	123	13	27	83	0.328985	0.709936	0.208727	0.281947	0.419274	0.103914	0.829556	0.892785	0.948231	0.737297	1.26049	1.1841	0.735337	0.809107
CUL5	1379	5966	13	2	4	6	69	13	12	43	0.359412	0.199443	0.208855	0.12056	0.117478	0.0894227	0.829556	0.782988	0.775507	0.737297	0.475888	1.04242	0.192967	0.602299
SIDT2	1422	5942	10	1	5	4	87	2	23	60	0.912125	0.0929308	0.209091	0.18639	0.201738	0.264032	0.829556	0.829587	0.820658	0.877635	0.532346	1.41187	0.242844	0.939454
NOTCH4	525	6286	15	2	5	8	241	20	64	153	0.779875	0.342936	0.209225	0.10099	0.197877	0.155096	0.829556	0.76338	0.820658	0.776512	0.69473	0.964903	0.346091	0.429496
NCOA7	1465	5913	14	1	3	10	90	10	15	64	0.506758	0.489802	0.209726	0.150468	0.0677591	0.188457	0.829556	0.815548	0.718126	0.815549	1.0943	1.44447	0.658734	0.926282
FRMD4B	1587	5837	10	1	4	5	51	6	12	33	0.508425	0.246723	0.211917	0.425667	0.395267	0.36004	0.829556	0.921161	0.948231	0.89783	0.499837	1.05521	0.223985	0.618003
QSER1	864	6473	19	1	3	15	152	27	31	93	0.38349	0.859355	0.212262	0.275037	0.418164	0.193588	0.829556	0.892785	0.948231	0.815549	1.40414	0.883247	0.789479	0.30282
SYNE2	1342	6024	68	7	20	40	674	79	148	443	0.243316	0.108486	0.213138	0.309596	0.419213	0.12443	0.829556	0.89851	0.948231	0.751849	0.717386	1.07069	0.137154	0.779997
DNAH1	1815	5699	11	0	4	7	100	7	24	66	0.391043	0.360206	0.214325	0.336828	0.221048	0.263138	0.829556	0.905784	0.820658	0.877635	0.756851	1.20736	0.436054	0.8172
SMCHD1	1197	5854	13	0	3	10	184	32	33	118	0.142469	0.575269	0.214456	0.357862	0.22193	0.151356	0.829556	0.907654	0.820658	0.771071	0.928658	1.12283	0.562618	0.751918
NKTR	1680	5806	30	5	4	21	116	24	12	77	0.399666	0.484011	0.214848	0.642119	0.496025	0.519323	0.829556	0.996646	0.948231	0.960846	1.4324	1.73624	0.815583	0.978404
FNIP1	1210	5942	12	1	1	10	109	12	14	83	0.793651	0.823288	0.215583	0.39703	0.267272	0.265779	0.829556	0.913995	0.88866	0.877635	3.03874	1.69696	0.946448	0.980408
MAN2A1	1328	5872	25	2	5	18	127	13	26	86	0.588783	0.653946	0.217136	0.471685	0.325068	0.396958	0.829556	0.936971	0.927191	0.930161	1.14928	1.07018	0.685802	0.65464
COL12A1	1228	6129	70	3	16	51	409	44	91	274	0.107401	0.625761	0.217178	0.445173	0.467292	0.412712	0.829556	0.933605	0.948231	0.93552	1.124	1.10745	0.702541	0.818279
EPHA2	1386	6045	17	2	4	11	153	37	32	82	0.29946	0.650858	0.217386	0.235158	0.410576	0.377958	0.829556	0.885152	0.948231	0.922112	1.2321	1.28811	0.729816	0.910703
RNF31	1086	6173	12	0	3	9	79	14	18	47	0.203209	0.696244	0.217871	0.13077	0.0745273	0.379099	0.829556	0.782988	0.718857	0.922112	1.14459	1.14459	0.685871	0.730992
EXOC6	1529	6022	13	1	3	9	88	11	18	58	0.53629	0.585814	0.219055	0.164863	0.0860326	0.0944378	0.829556	0.821	0.719874	0.737297	1.03685	1.14053	0.627629	0.728659
GBF1	1508	6025	33	0	10	23	167	14	30	122	0.0354214	0.135805	0.219077	0.109148	0.0736455	0.0680627	0.829556	0.76717	0.718857	0.737297	0.915776	1.72537	0.473119	0.99827
MYO18A	802	6150	17	0	5	12	171	11	48	112	0.376376	0.617608	0.219089	0.206348	0.260137	0.490478	0.829556	0.863091	0.87647	0.958965	0.956122	0.962762	0.557502	0.44167
PPL	636	6161	16	2	7	7	188	21	56	110	0.549567	0.174433	0.219657	0.186605	0.217865	0.141355	0.829556	0.829587	0.820658	0.766159	0.531999	0.85711	0.158517	0.192817
FAM13A	1241	6352	15	1	5	9	116	15	32	68	0.405059	0.499467	0.220121	0.271703	0.183967	0.173516	0.829556	0.892785	0.820658	0.798307	0.649263	0.821723	0.297356	0.200937
IFNAR1	931	6325	12	0	3	9	39	6	6	27	0.184615	0.450291	0.220321	0.155188	0.186335	0.172392	0.829556	0.818703	0.820658	0.796221	0.954184	1.59031	0.581955	0.897222
ANK2	1288	6327	18	0	4	13	148	7	42	99	0.557278	0.790044	0.220909	0.153027	0.0758466	0.0953879	0.829556	0.818703	0.718857	0.737297	1.09861	0.828984	0.656225	0.175505
LRP6	624	6071	11	1	2	8	171	19	34	118	0.712121	0.696053	0.221217	0.24513	0.197638	0.294245	0.829556	0.885152	0.820658	0.877635	1.35774	1.16251	0.762489	0.808252
C2CD3	725	6305	18	1	6	11	195	19	43	132	0.338843	0.242799	0.22225	0.214465	0.241924	0.29965	0.829556	0.863091	0.857049	0.877635	0.694238	1.13823	0.309381	0.794922
FRY	1503	5567	28	3	9	16	203	20	49	134	0.539974	0.229937	0.222574	0.211489	0.322973	0.446382	0.829556	0.863091	0.927191	0.948438	0.716915	1.08269	0.267013	0.710221
ADAM19	1105	6003	33	2	10	21	133	12	29	92	0.319467	0.234815	0.222823	0.355015	0.475635	0.294179	0.829556	0.907654	0.948231	0.877635	0.841047	1.30507	0.38821	0.915916
RALGDS	1162	6089	13	0	4	9	84	5	24	54	0.500367	0.615788	0.224097	0.353309	0.348096	0.301266	0.829556	0.905784	0.932988	0.877635	1.0278	1.08491	0.620792	0.670897
MOV10	1173	6211	18	0	6	12	92	7	21	64	0.220097	0.314126	0.22434	0.187473	0.187413	0.0734818	0.829556	0.830336	0.820658	0.737297	0.866052	1.44342	0.47377	0.947988
DNMBP	1525	6010	38	7	9	22	167	14	31	122	0.887851	0.197705	0.224465	0.252252	0.405091	0.347319	0.829556	0.885152	0.948231	0.889014	1.19245	1.59966	0.734602	0.994614
LMBRD1	1109	6184	13	0	3	10	66	7	11	48	0.273684	0.487209	0.224807	0.0719481	0.145823	0.0638177	0.829556	0.691465	0.799931	0.737297	1.09149	1.51817	0.65727	0.925532
DPYD	1212	6232	23	3	7	13	188	11	39	138	0.832006	0.153527	0.225496	0.158311	0.251069	0.236348	0.829556	0.821	0.866972	0.863214	0.78184	1.2542	0.366868	0.912141
POLK	1436	5903	17	0	3	14	70	10	11	49	0.179842	0.648213	0.226581	0.508601	0.450236	0.333611	0.829556	0.949974	0.948231	0.887816	1.22017	1.37863	0.715758	0.872767
ZNF646	446	6332	15	1	5	9	181	19	41	121	0.404825	0.286934	0.226954	0.161018	0.282742	0.137838	0.829556	0.821	0.898158	0.75702	0.714876	1.15949	0.358189	0.819395
RYR1	623	6176	10	0	4	6	97	7	29	61	0.447751	0.431113	0.227392	0.300911	0.497833	0.232671	0.829556	0.894017	0.948231	0.860305	0.669831	1.0009	0.373742	0.540386
CAMSAP1	1157	6068	21	3	6	12	170	18	48	102	0.785927	0.550402	0.228033	0.366466	0.387854	0.563892	0.829556	0.910923	0.948231	0.984813	0.824623	0.901932	0.435399	0.304075
LARP4B	1068	5883	12	3	2	7	145	48	20	76	0.477584	0.601855	0.229473	0.408528	0.201159	0.554082	0.829556	0.913995	0.820658	0.981113	1.83094	1.66615	0.872412	0.988582
ERCC6	1131	6266	12	1	5	6	171	23	29	118	0.198221	0.0595932	0.230392	0.160212	0.158101	0.0705032	0.829556	0.821	0.812457	0.737297	0.477592	1.51747	0.166788	0.986067
ZNF469	1640	5573	11	0	2	8	14	2	3	9	0.47619	0.781955	0.231082	0.71338	0.417326	0.813854	0.829556	0.998286	0.948231	1	1.69473	1.41227	0.846913	0.79223
ME2	1848	5606	15	2	5	8	61	7	14	39	0.602331	0.295269	0.231133	0.0506634	0.12936	0.092168	0.829556	0.658799	0.775507	0.737297	0.507728	0.866361	0.176501	0.369398
ILF3	729	6406	12	0	4	8	94	9	28	57	0.35509	0.607192	0.231711	0.160482	0.129276	0.0813036	0.829556	0.821	0.775507	0.737297	0.803948	0.847017	0.46623	0.268899
FLNB	1750	5753	39	6	16	16	308	33	92	181	0.645069	0.0536057	0.232896	0.0856326	0.370682	0.492857	0.829556	0.720893	0.942184	0.958965	0.533549	0.890794	0.0459146	0.197659
ALPK1	1286	6331	20	0	3	17	150	16	40	94	0.379618	0.957565	0.233591	0.381653	0.606448	0.664779	0.829556	0.911538	0.986255	1	1.93105	0.868973	0.915225	0.252762
DLG4	2251	5288	10	0	5	5	49	2	18	29	0.633333	0.366245	0.236186	0.338293	0.185198	0.289547	0.829556	0.905784	0.820658	0.877635	0.436315	0.727192	0.15682	0.17889
PIGO	1329	5867	23	2	5	16	105	24	29	52	0.338628	0.905592	0.23663	0.319616	0.297459	0.501272	0.829556	0.905784	0.900725	0.958965	1.46459	0.831813	0.838092	0.243277
DNMT1	753	6415	11	0	3	8	178	14	51	111	0.494932	0.725636	0.237108	0.29543	0.178399	0.464781	0.829556	0.894017	0.820658	0.954456	1.05902	0.887711	0.645322	0.264822
ZNF609	1035	6456	14	1	3	10	145	33	34	76	0.339865	0.814182	0.237338	0.298056	0.15189	0.121492	0.829556	0.894017	0.808489	0.751849	1.14483	0.888926	0.684193	0.311223
RAB11FIP1	1353	5162	10	0	3	7	119	8	32	78	0.530346	0.602183	0.237627	0.360063	0.226776	0.557686	0.829556	0.907964	0.830814	0.982156	0.873367	0.959145	0.540328	0.455914
SNX19	1364	5975	17	0	5	12	95	9	20	66	0.190939	0.395496	0.237704	0.173852	0.219154	0.483659	0.829556	0.821	0.820658	0.958965	0.923713	1.36633	0.531856	0.914996
ZDHHC8	1300	5968	12	1	3	8	94	24	23	47	0.319928	0.756965	0.239499	0.250634	0.164531	0.287237	0.829556	0.885152	0.820658	0.877635	1.23281	1.02511	0.727112	0.582694
LRP1	387	6595	22	0	5	17	555	43	171	338	0.331453	0.905463	0.239925	0.245142	0.511411	0.290514	0.829556	0.885152	0.948231	0.877635	1.42116	0.862867	0.822116	0.063274
RABGAP1	1125	6119	18	2	5	11	90	17	24	49	0.41958	0.655246	0.240212	0.249365	0.175979	0.201487	0.829556	0.885152	0.820658	0.816264	0.835518	0.736434	0.454195	0.131406
ARSB	1429	5917	11	1	2	8	49	2	13	34	0.943627	0.811041	0.241057	0.404858	0.511522	0.342275	0.829556	0.913995	0.948231	0.887816	1.73383	1.06697	0.854715	0.632416
RAI1	2079	5408	40	7	15	18	181	25	47	103	0.508133	0.0901433	0.241856	0.319923	0.208179	0.131442	0.829556	0.905784	0.820658	0.751849	0.597076	1.00722	0.0894003	0.546445
PHF2	1208	6108	22	1	7	14	149	31	43	65	0.104743	0.787226	0.241985	0.565848	0.432258	0.261284	0.829556	0.971535	0.948231	0.877635	0.964863	0.712054	0.5487	0.0515727
SETD5	1487	5810	23	2	4	17	130	18	21	91	0.44729	0.590401	0.242157	0.425778	0.318604	0.476206	0.829556	0.921161	0.927191	0.958965	1.42016	1.51784	0.809926	0.972128
ARHGEF10	2123	4881	28	2	10	16	116	7	42	67	0.757456	0.587109	0.242692	0.440656	0.613948	0.331661	0.829556	0.931098	0.986255	0.887816	0.671549	0.639571	0.210855	0.0160706
TBC1D9	1235	6338	16	1	8	7	185	16	59	107	0.417339	0.13891	0.242835	0.413577	0.438194	0.491563	0.829556	0.915084	0.948231	0.958965	0.339974	0.770498	0.0337068	0.0620318
ZBTB40	1433	6093	12	2	5	4	134	15	42	69	0.730898	0.241667	0.243196	0.139471	0.360858	0.302064	0.829556	0.787015	0.936362	0.877635	0.382906	0.692877	0.113505	0.0370381
KIF11	1523	6031	10	1	1	8	59	7	9	43	0.816993	0.824567	0.243305	0.309428	0.5	0.592896	0.829556	0.89851	0.948231	0.991147	2.70308	1.6352	0.927653	0.942154
PDGFRA	826	6512	20	1	6	13	240	19	58	162	0.468212	0.399045	0.243905	0.245862	0.279053	0.338666	0.829556	0.885152	0.898158	0.887816	0.88847	1.16201	0.487726	0.857248
AFF4	1214	5933	13	1	2	10	119	15	23	81	0.666041	0.782113	0.244886	0.370662	0.414964	0.21358	0.830512	0.910923	0.948231	0.836697	1.61099	1.12069	0.82956	0.721225
MTHFD1L	1512	5903	13	0	4	9	92	10	15	67	0.163193	0.241654	0.246322	0.406877	0.644672	0.357124	0.832666	0.913995	0.986255	0.896209	0.88377	1.91156	0.522052	0.994731
TACC2	1409	6038	63	1	20	42	380	35	103	241	0.0247347	0.409777	0.247682	0.222628	0.318688	0.10683	0.832666	0.872142	0.927191	0.737297	0.798736	0.908925	0.241549	0.22338
FCGBP	681	6163	20	1	9	10	425	17	145	258	0.718813	0.22029	0.248029	0.119147	0.304838	0.313679	0.832666	0.782988	0.916057	0.88369	0.506903	0.827475	0.106099	0.03864
GJA1	1498	5904	16	2	4	10	86	9	20	56	0.731025	0.546297	0.248465	0.559721	0.327968	0.169549	0.832666	0.971535	0.927191	0.79234	0.962211	1.15465	0.574427	0.749147
C2CD2L	1385	5960	12	0	6	6	61	2	18	41	0.584615	0.16643	0.249521	0.367971	0.316528	0.335358	0.832666	0.910923	0.927191	0.887816	0.451676	1.02882	0.136304	0.588564
ITGAE	2120	5400	33	4	9	20	114	9	24	78	0.730395	0.276474	0.249989	0.154473	0.218447	0.103903	0.832666	0.818703	0.820658	0.737297	1.08345	1.43086	0.645669	0.954149
WHSC1L1	1302	5178	13	0	4	9	103	10	23	69	0.265728	0.441042	0.250955	0.308756	0.216038	0.295415	0.832666	0.89851	0.820658	0.877635	0.666514	0.991721	0.344078	0.5249
PLOD1	1381	6046	11	1	6	4	74	4	26	44	0.767018	0.150513	0.251269	0.149643	0.0936044	0.116236	0.832666	0.815001	0.726371	0.737297	0.37313	0.809406	0.0891957	0.227482
AKNA	1135	6125	23	0	7	16	136	9	37	89	0.248604	0.548148	0.251834	0.225657	0.332161	0.321816	0.832666	0.874262	0.927191	0.887816	0.87482	0.982695	0.461226	0.497072
KIF1B	1401	6014	27	1	9	17	257	11	62	183	0.557253	0.210983	0.258422	0.184263	0.0847448	0.247499	0.833568	0.829587	0.719874	0.871818	0.698859	1.07083	0.247635	0.702459
SLC12A6	1274	6247	18	1	4	13	125	16	27	82	0.411618	0.647385	0.258774	0.306166	0.532217	0.623681	0.833568	0.89851	0.949802	1	1.24086	1.18178	0.732723	0.805932
GTPBP1	1505	5836	11	0	3	8	61	6	15	40	0.403162	0.630452	0.258885	0.384921	0.123035	0.106704	0.833568	0.911978	0.775507	0.737297	1.1634	1.19249	0.696817	0.764199
AHDC1	1406	6114	12	2	4	6	160	24	45	87	0.657642	0.473798	0.258906	0.273098	0.341611	0.258557	0.833568	0.892785	0.930272	0.877635	0.653573	0.929526	0.359707	0.373102
HERC2	1218	6288	73	7	24	42	602	54	172	373	0.537494	0.255496	0.259044	0.325375	0.619084	0.679152	0.833568	0.905784	0.986255	1	0.735552	0.90547	0.139286	0.148969
PTPRM	1216	5886	23	1	8	14	213	10	53	150	0.584339	0.215505	0.259558	0.158265	0.29487	0.197875	0.833568	0.821	0.900725	0.815549	0.703897	1.11915	0.275905	0.782954
WTAP	1579	5861	12	0	3	9	38	4	8	26	0.362637	0.601116	0.259813	0.267891	0.509117	0.669861	0.833568	0.892785	0.948231	1	0.92261	1.15326	0.562198	0.70007
XYLT1	512	6277	12	0	5	7	160	8	54	98	0.518386	0.444713	0.260025	0.112564	0.211635	0.0973535	0.833568	0.772329	0.820658	0.737297	0.596728	0.813003	0.273323	0.126322
AHNAK	612	6672	64	4	22	38	692	44	187	458	0.442803	0.136817	0.26192	0.1023	0.369398	0.178358	0.833568	0.76338	0.942184	0.806298	0.636151	0.95915	0.0628428	0.327593
EP300	1573	5798	33	9	6	17	264	57	35	169	0.549683	0.214817	0.262044	0.719852	0.285473	0.282015	0.833568	0.998286	0.898158	0.877635	1.22475	1.81963	0.737882	0.999829
EFTUD2	888	6131	13	1	5	7	107	5	25	76	0.743822	0.179509	0.262086	0.373582	0.278164	0.24362	0.833568	0.911538	0.898158	0.871455	0.559601	1.2631	0.239205	0.871555
DMXL1	1282	5901	39	6	6	27	270	42	47	177	0.688472	0.718383	0.262315	0.299717	0.293228	0.359342	0.833568	0.894017	0.900725	0.89783	1.43919	1.15403	0.8473	0.831877
MYO6	1234	6111	20	3	5	12	141	25	21	95	0.30996	0.214455	0.262335	0.498959	0.385782	0.430718	0.833568	0.94954	0.948231	0.944364	0.848285	1.48594	0.46249	0.965607
SEC24D	1285	6312	14	2	6	6	109	13	19	77	0.349622	0.0297599	0.263263	0.41381	0.341542	0.478663	0.833568	0.915084	0.930272	0.958965	0.435302	1.44337	0.104966	0.945291
ABCC4	1243	5662	15	1	4	10	136	22	30	82	0.321201	0.554665	0.264514	0.129864	0.231352	0.608534	0.833568	0.782988	0.834696	1	1.00992	1.13846	0.60386	0.761733
LIMCH1	1133	6344	12	0	3	9	98	24	22	52	0.124837	0.743316	0.264933	0.515017	0.358073	0.454137	0.833568	0.95222	0.936362	0.949051	0.979682	0.831246	0.597377	0.268292
RANBP2	352	6899	11	0	4	7	324	47	54	222	0.0887551	0.16186	0.266022	0.0611233	0.0365793	0.182681	0.833568	0.676503	0.683965	0.808483	0.489957	1.27544	0.204941	0.957279
PARD3	943	6123	23	3	7	13	172	25	35	112	0.370434	0.206216	0.266107	0.243459	0.306809	0.220512	0.833568	0.885152	0.917337	0.846602	0.739365	1.29142	0.326365	0.927034
MAP1A	1291	6259	31	2	8	20	265	23	62	178	0.480424	0.454801	0.266604	0.285811	0.194706	0.319617	0.833568	0.892785	0.820658	0.887816	0.882951	1.00909	0.451704	0.548894
ZNF33A	919	6184	14	2	5	7	118	14	27	77	0.570835	0.204647	0.266619	0.46766	0.546346	0.264871	0.833568	0.936971	0.958879	0.877635	0.554896	1.00475	0.217596	0.54464
PRR12	875	6170	13	2	6	5	176	23	53	100	0.556563	0.157696	0.266854	0.251276	0.181644	0.074788	0.833568	0.885152	0.820658	0.737297	0.370826	0.864793	0.0875749	0.218386
SASH1	1515	5900	20	2	6	12	148	10	41	95	0.80174	0.487453	0.267609	0.40243	0.450058	0.552325	0.833602	0.913995	0.948231	0.981113	0.840784	0.955938	0.446748	0.435175
GAPVD1	1131	6110	16	1	5	10	140	21	24	95	0.171445	0.197683	0.268754	0.26777	0.0886731	0.115812	0.833602	0.892785	0.720925	0.737297	0.674352	1.4049	0.315113	0.950786
NPR2	1327	5844	13	0	4	9	29	2	5	20	0.381818	0.360483	0.269456	0.172449	0.220669	0.216622	0.833602	0.821	0.820658	0.837559	0.91727	1.71224	0.546562	0.909842
PRDM2	1384	6060	20	1	5	13	229	20	54	151	0.499805	0.543066	0.269674	0.175667	0.175402	0.488324	0.833602	0.821	0.820658	0.958965	0.859462	0.973322	0.475117	0.457975
SKIV2L2	1219	6014	12	0	2	10	103	13	20	69	0.388235	0.790258	0.270847	0.420366	0.123188	0.385187	0.835053	0.918008	0.775507	0.928298	1.33962	1.0449	0.755832	0.609013
SMG6	2112	5417	24	1	6	17	129	9	36	84	0.593762	0.729423	0.272291	0.255031	0.183865	0.411238	0.83733	0.885152	0.820658	0.93552	1.09502	0.922652	0.652182	0.373502
PIK3R1	1452	5892	27	9	3	8	229	77	17	76	0.402505	0.355552	0.273045	0.4651	0.623675	0.593787	0.837478	0.936971	0.986255	0.991147	1.38436	1.69264	0.782449	0.987006
REXO1	1332	6054	12	1	5	6	105	6	34	55	0.778591	0.4381	0.275189	0.276026	0.357779	0.451419	0.838202	0.892785	0.936362	0.948438	0.54611	0.776333	0.239218	0.144243
MGAT1	1014	5963	11	0	4	7	54	3	16	35	0.547149	0.502267	0.275976	0.21191	0.306404	0.300986	0.838202	0.863091	0.917337	0.877635	0.821212	1.08517	0.487176	0.657308
CUL3	777	6597	11	0	1	10	103	13	17	73	0.580645	0.898441	0.276737	0.901887	0.894543	0.686531	0.838202	1	1	1	2.85914	1.37911	0.937097	0.911982
IGSF3	1102	6209	15	2	7	6	161	9	53	91	0.861636	0.179918	0.277217	0.479453	0.288363	0.250093	0.838202	0.939276	0.898158	0.873416	0.501594	0.80326	0.140857	0.116624
A2M	560	6094	12	1	4	7	209	15	64	130	0.759726	0.525073	0.277346	0.13328	0.149923	0.148571	0.838202	0.782988	0.805243	0.771071	0.802946	0.890768	0.465432	0.242842
SORBS1	1510	6049	19	0	3	16	106	6	21	79	0.498522	0.79236	0.278135	0.316383	0.644316	0.653684	0.838202	0.905784	0.986255	1	1.92581	1.42716	0.913793	0.945808
CHD8	1058	6187	20	2	4	14	255	38	42	173	0.407273	0.491291	0.278224	0.275266	0.360367	0.310087	0.838202	0.892785	0.936362	0.879096	1.28358	1.48987	0.7527	0.99397
SHROOM3	1048	6403	19	1	7	11	174	14	54	104	0.503232	0.437443	0.279719	0.261134	0.198424	0.296187	0.839124	0.890707	0.820658	0.877635	0.607171	0.801385	0.213372	0.106355
ZNF91	529	6577	10	0	2	8	158	16	26	115	0.399577	0.586041	0.280408	0.637593	0.637028	0.653684	0.839124	0.994374	0.986255	1	1.06921	1.31595	0.656267	0.919096
TNKS	2206	4825	17	0	4	13	90	8	20	60	0.295495	0.657579	0.280815	0.110817	0.324459	0.290511	0.839124	0.769218	0.927191	0.877635	1.172	1.11791	0.697921	0.70701
TRIM5	1235	6261	11	2	3	6	65	9	18	38	0.791226	0.609653	0.282975	0.337533	0.394497	0.591859	0.839124	0.905784	0.948231	0.991147	0.961382	0.861238	0.590224	0.342198
SLC12A2	1225	5935	19	1	2	15	124	14	30	78	0.764724	0.965187	0.283464	0.129447	0.701787	0.724531	0.839124	0.782988	0.986255	1	2.75875	1.00005	0.965192	0.535417
WDR47	1188	6208	11	1	2	8	89	21	6	60	0.165517	0.282374	0.283746	0.276488	0.15951	0.182131	0.839124	0.892785	0.812457	0.808483	1.39847	3.57386	0.774847	0.999902
TPP2	1207	5683	14	1	4	9	117	10	31	76	0.657005	0.560225	0.283789	0.316052	0.181292	0.328923	0.839124	0.905784	0.820658	0.887816	0.765647	0.810104	0.423474	0.18568
BICD2	1200	6113	11	1	3	6	109	4	25	80	0.90066	0.386493	0.284791	0.263153	0.486294	0.402841	0.839124	0.892465	0.948231	0.93552	1.08512	1.50677	0.66232	0.974396
PHLDB1	1383	5954	14	2	5	7	135	9	40	85	0.871742	0.350275	0.284892	0.277592	0.214416	0.585932	0.839124	0.892785	0.820658	0.991147	0.751349	0.907881	0.397806	0.337387
DMXL2	1161	6353	42	4	6	32	333	36	61	234	0.704612	0.820583	0.285624	0.316868	0.380498	0.673544	0.839197	0.905784	0.948231	1	1.64687	1.15191	0.914276	0.856243
KIAA0556	470	6313	13	1	4	8	200	18	57	125	0.659916	0.555122	0.287221	0.290578	0.192214	0.494266	0.841807	0.893245	0.820658	0.958965	0.874202	0.927029	0.514886	0.340965
PSD3	2279	4799	43	4	10	29	101	18	23	60	0.245896	0.672915	0.288195	0.294697	0.378104	0.178215	0.84258	0.894017	0.948231	0.806298	0.98854	0.98854	0.547967	0.520915
ANKS6	1207	6101	11	0	4	7	76	7	27	42	0.426268	0.688256	0.289473	0.536578	0.376819	0.479307	0.843627	0.956693	0.948231	0.958965	0.778135	0.774017	0.453293	0.173644
FUCA2	1475	5936	12	2	2	8	34	5	7	22	0.807692	0.7502	0.289975	0.285311	0.126206	0.263298	0.843627	0.892785	0.775507	0.877635	1.53652	1.26824	0.812102	0.771586
ZMIZ1	1251	6121	22	3	6	11	147	22	38	79	0.580034	0.508312	0.292936	0.405205	0.53145	0.434175	0.850159	0.913995	0.949802	0.944364	0.887449	0.980864	0.493079	0.49467
FREM2	1629	5461	23	1	5	17	99	7	18	73	0.502714	0.480122	0.295071	0.243449	0.234949	0.263448	0.850962	0.885152	0.842552	0.877635	1.35873	1.61454	0.797031	0.978504
GLB1	1571	5845	12	1	5	6	62	3	12	47	0.684211	0.0849761	0.295088	0.372246	0.544732	0.42329	0.850962	0.911538	0.958879	0.944364	0.503265	1.4379	0.188821	0.902497
ENTPD1	1516	6040	10	0	4	6	60	7	15	38	0.259264	0.347522	0.295363	0.369843	0.296549	0.139018	0.850962	0.910923	0.900725	0.75702	0.576455	1.12729	0.291834	0.702063
CHL1	1499	5815	18	0	4	14	103	5	22	76	0.475131	0.614155	0.30099	0.191268	0.207114	0.197193	0.855969	0.839518	0.820658	0.815549	1.04263	1.08325	0.619939	0.66731
CELSR1	1677	5677	35	3	8	24	302	36	100	166	0.674007	0.947875	0.301673	0.513416	0.521568	0.507157	0.855969	0.95222	0.948231	0.958965	1.59368	0.85323	0.91432	0.115304
MICAL2	1131	6308	22	0	6	16	151	8	39	103	0.354789	0.597708	0.30194	0.176373	0.190031	0.128207	0.855969	0.821	0.820658	0.751849	1.06396	1.10488	0.630725	0.731439
IDE	1523	6031	21	1	5	15	88	15	24	48	0.2916	0.836559	0.302702	0.454534	0.492169	0.308161	0.855969	0.936971	0.948231	0.877635	0.955284	0.67666	0.550299	0.0761236
EXTL3	2185	4853	13	1	5	7	91	6	27	58	0.709804	0.352577	0.302805	0.248299	0.198911	0.325968	0.855969	0.885152	0.820658	0.887816	0.597526	0.980069	0.27406	0.505119
PKN1	628	6473	11	1	4	6	108	12	39	56	0.672003	0.649817	0.304116	0.107098	0.460291	0.325767	0.855969	0.76717	0.948231	0.887816	0.827661	0.715487	0.492127	0.0658741
VPS13A	1212	6143	28	1	7	20	324	54	52	213	0.0381232	0.289651	0.305448	0.244198	0.159414	0.149798	0.855969	0.885152	0.812457	0.771071	0.865949	1.34333	0.442319	0.979921
RNF219	1387	5602	13	2	2	9	81	11	20	50	0.866176	0.862911	0.305957	0.339055	0.617195	0.717944	0.855969	0.905784	0.986255	1	1.58166	0.805209	0.822746	0.2393
VWF	514	6088	25	2	7	16	350	33	99	217	0.605846	0.617101	0.306184	0.280072	0.249375	0.0872516	0.855969	0.892785	0.866972	0.737297	1.03138	0.999509	0.603533	0.519075
FHDC1	1346	6219	17	2	3	12	131	12	26	90	0.814237	0.692529	0.306585	0.323292	0.392916	0.369841	0.855969	0.905784	0.948231	0.914587	1.62439	1.32643	0.8536	0.918627
EP400	647	6423	21	1	6	13	379	38	132	200	0.519087	0.828751	0.30705	0.67327	0.735137	0.932262	0.855969	0.996691	0.986255	1	0.899751	0.688971	0.50078	0.000534726
NUP210	1504	5828	20	0	6	14	210	11	73	126	0.446444	0.796887	0.308441	0.342176	0.254984	0.233377	0.855969	0.905784	0.867236	0.860305	1.08736	0.842654	0.649862	0.136015
NCAPD3	1367	5955	16	2	2	12	172	24	41	107	0.853384	0.928423	0.30883	0.391149	0.444198	0.819471	0.855969	0.913995	0.948231	1	2.33113	1.06133	0.934972	0.657245
IL10RA	1406	5941	15	0	6	9	51	4	18	29	0.357265	0.569045	0.30925	0.378959	0.341701	0.275552	0.855969	0.911538	0.930272	0.877635	0.647739	0.76769	0.283081	0.225253
RCBTB2	1677	5384	14	1	3	10	47	2	9	36	0.846154	0.540755	0.309591	0.253038	0.523527	0.797481	0.855969	0.885152	0.948231	1	1.095	1.3505	0.659101	0.836995
CDC42BPB	1253	5995	14	1	5	8	182	17	67	98	0.65544	0.666155	0.310789	0.260702	0.316806	0.216477	0.855969	0.890707	0.927191	0.837559	0.724767	0.625007	0.373678	0.00206544
BAHD1	1351	6213	10	1	4	5	92	10	21	61	0.510037	0.204847	0.31084	0.302353	0.516055	0.200946	0.855969	0.894017	0.948231	0.816264	0.550247	1.1529	0.268537	0.751454
SNAPC4	1151	6058	13	1	4	6	128	10	36	65	0.70807	0.517306	0.311496	0.438013	0.454686	0.301727	0.855969	0.931098	0.948231	0.877635	0.639678	0.829212	0.347619	0.208054
MYBBP1A	2135	5381	25	0	8	17	97	5	27	62	0.306039	0.527023	0.312421	0.254304	0.414957	0.147718	0.855969	0.885152	0.948231	0.771071	0.975474	1.08811	0.55182	0.680731
CYB5R4	1395	5988	11	3	3	5	49	13	11	24	0.604598	0.521615	0.313857	0.299277	0.151656	0.297526	0.855969	0.894017	0.808489	0.877635	0.737905	0.776238	0.444996	0.293367
LRRK1	870	6287	15	0	6	9	210	7	79	124	0.61334	0.568634	0.315016	0.38303	0.386229	0.229863	0.855969	0.911538	0.948231	0.858603	0.670588	0.730007	0.305144	0.0175527
ATP10A	1192	6285	12	1	5	6	71	1	22	48	0.963054	0.277482	0.3164	0.226759	0.212641	0.222965	0.855969	0.874262	0.820658	0.848267	0.625211	0.994654	0.299686	0.536293
BDP1	1439	5904	40	1	7	32	260	39	45	174	0.0655765	0.714982	0.316699	0.301437	0.426171	0.215757	0.855969	0.894017	0.948231	0.837559	1.19006	1.09915	0.722223	0.739469
COL6A1	1059	6163	14	1	6	7	131	4	47	79	0.894425	0.366231	0.31694	0.5	0.197388	0.414999	0.855969	0.94954	0.820658	0.936509	0.539076	0.786494	0.200168	0.113208
UBR1	1308	6248	15	2	4	9	158	20	27	111	0.511499	0.263077	0.316973	0.126436	0.239017	0.283491	0.855969	0.782988	0.850939	0.877635	0.799468	1.33514	0.447139	0.931453
MAGI1	1636	5827	42	5	9	25	154	15	33	102	0.742336	0.48207	0.317454	0.350005	0.340593	0.450939	0.855969	0.905784	0.930272	0.948438	1.0759	1.17371	0.637635	0.815641
MFHAS1	2203	4829	10	1	4	5	56	4	17	35	0.764275	0.370962	0.317852	0.488994	0.5	0.427659	0.855969	0.944223	0.948231	0.944364	0.589715	1.0268	0.318596	0.586673
ZEB1	976	6097	22	1	4	17	194	21	40	133	0.455697	0.749665	0.319658	0.254838	0.314382	0.42146	0.855969	0.885152	0.927191	0.944173	1.27059	1.07627	0.746513	0.68678
CRTAC1	1530	6013	11	1	3	7	22	1	8	13	0.923077	0.797966	0.31982	0.216673	0.370385	0.391857	0.855969	0.863091	0.942184	0.930161	1.19293	0.782862	0.710075	0.36369
CCDC80	514	6147	11	0	4	7	127	14	29	84	0.229417	0.327703	0.320027	0.248719	0.34742	0.194519	0.855969	0.885152	0.932988	0.815549	0.64664	1.14675	0.342489	0.76966
MAP1B	1444	5898	48	7	17	24	319	36	90	191	0.627986	0.153747	0.321317	0.325527	0.334842	0.528648	0.855969	0.905784	0.928559	0.96264	0.506454	0.761629	0.0240807	0.0196117
FRG1	1479	6016	24	2	5	13	53	5	9	35	0.571852	0.376624	0.322077	0.369819	0.352438	0.306047	0.855969	0.910923	0.936362	0.877635	0.836562	1.1464	0.449504	0.698953
STARD13	1531	5558	16	2	6	8	123	5	42	76	0.94488	0.397585	0.322141	0.330443	0.591941	0.388176	0.855969	0.905784	0.984081	0.928298	0.56703	0.711037	0.206929	0.0476564
SLMAP	1753	5754	12	2	4	6	60	7	18	34	0.780896	0.503907	0.322359	0.407393	0.328827	0.241856	0.855969	0.913995	0.927191	0.871455	0.583519	0.648354	0.278108	0.0867903
KDR	829	6525	24	3	7	14	302	27	66	208	0.678059	0.240852	0.322862	0.290369	0.124769	0.167092	0.855969	0.893245	0.775507	0.790193	0.874048	1.2433	0.458089	0.95011
TSR1	2116	5409	14	0	4	10	56	4	13	38	0.397661	0.531062	0.323258	0.361853	0.148019	0.0450788	0.855969	0.909998	0.799931	0.727131	0.81125	1.02342	0.460986	0.581083
MLH3	1355	6001	15	1	3	11	128	22	22	83	0.336879	0.600898	0.325	0.31854	0.485368	0.556124	0.855969	0.905784	0.948231	0.981113	1.21189	1.38216	0.714271	0.933636
SBF1	1664	5683	19	2	6	10	175	19	43	110	0.549926	0.300782	0.325891	0.360279	0.25048	0.521301	0.855969	0.907964	0.866972	0.960846	0.73664	1.18205	0.36185	0.847013
CLASP2	1570	5850	18	3	2	13	112	16	21	75	0.881533	0.867841	0.325981	0.588676	0.645192	0.506766	0.855969	0.977554	0.986255	0.958965	2.13446	1.17613	0.916836	0.779897
WRAP53	2279	5267	10	1	3	6	55	10	18	27	0.573276	0.769222	0.327636	0.391746	0.588047	0.477756	0.855969	0.913995	0.980169	0.958965	0.766983	0.639152	0.475159	0.0906333
ARID4A	1252	6097	17	2	2	13	149	39	27	83	0.552391	0.909014	0.327726	0.410339	0.471927	0.306118	0.855969	0.913995	0.948231	0.877635	1.83268	0.940584	0.874348	0.423993
FAM135A	1146	6164	12	1	3	8	112	12	21	78	0.559285	0.445595	0.327793	0.299929	0.283119	0.330584	0.855969	0.894017	0.898158	0.887816	0.756003	1.134	0.451663	0.73231
ARAP3	1108	6030	22	5	4	13	151	28	38	85	0.864527	0.815067	0.32811	0.33792	0.515615	0.612	0.855969	0.905784	0.948231	1	1.5449	1.05161	0.849693	0.635291
TNC	1136	6131	45	2	16	27	323	31	102	189	0.195256	0.453174	0.329679	0.133951	0.138732	0.138521	0.858059	0.782988	0.795531	0.75702	0.742869	0.819717	0.21124	0.0585714
SEC23IP	1445	6046	14	1	3	10	100	11	22	67	0.609433	0.667809	0.330356	0.531326	0.484413	0.567764	0.858059	0.955217	0.948231	0.984813	1.16877	1.07218	0.694316	0.651195
GPHN	1381	6001	12	1	4	7	104	11	18	75	0.410104	0.176624	0.33323	0.175981	0.218109	0.208448	0.858392	0.821	0.820658	0.829224	0.665139	1.51504	0.349893	0.961575
CEP164	1423	5945	14	3	6	5	158	19	41	97	0.694249	0.0886763	0.333454	0.352357	0.405923	0.34334	0.858392	0.905784	0.948231	0.887816	0.367695	0.923722	0.0746664	0.363751
ERBB2	784	5982	13	0	4	9	125	5	41	77	0.64696	0.716901	0.333492	0.474406	0.457969	0.666061	0.858392	0.936971	0.948231	1	0.942549	0.796952	0.564446	0.140788
TP53BP1	1296	6255	22	4	3	14	220	41	42	136	0.782979	0.800439	0.335012	0.329818	0.476884	0.632438	0.858392	0.905784	0.948231	1	1.62065	1.15037	0.854137	0.81286
DOCK6	742	6420	13	2	6	5	176	12	54	109	0.830797	0.132565	0.335469	0.324599	0.160803	0.275422	0.858392	0.905784	0.812457	0.877635	0.519246	0.923104	0.182299	0.341686
SLC12A4	1482	5729	13	1	6	6	104	4	36	63	0.846017	0.269091	0.338184	0.291979	0.444722	0.538624	0.858392	0.893245	0.948231	0.97313	0.444398	0.790041	0.130385	0.152661
GCN1L1	545	6520	11	1	4	6	274	19	83	166	0.766333	0.447881	0.338204	0.400769	0.352865	0.187604	0.858392	0.913995	0.936362	0.815549	0.687252	0.988097	0.388632	0.487298
PLA2G4F	1327	6222	12	0	5	7	25	0	8	16	1	0.446777	0.339219	0.733222	0.627992	0.479108	0.858392	0.998859	0.986255	0.958965	0.601733	0.859618	0.27795	0.437921
TLE1	1214	6147	11	0	3	8	89	17	24	46	0.220855	0.784856	0.34029	0.335231	0.330592	0.594521	0.858392	0.905784	0.927191	0.991147	1.11002	0.936581	0.671405	0.436646
SATB1	1523	5861	23	0	6	16	99	10	31	57	0.216509	0.830632	0.341187	0.314057	0.237985	0.277729	0.858392	0.905784	0.850868	0.877635	0.92172	0.70244	0.51311	0.0694427
NOTCH1	1148	6046	33	9	11	13	354	55	80	199	0.72903	0.0665025	0.341569	0.426047	0.192662	0.343379	0.858392	0.921161	0.820658	0.887816	0.714147	1.28231	0.247027	0.977155
GTF3C1	478	6306	14	1	4	9	286	31	71	184	0.528215	0.517239	0.341966	0.463794	0.209891	0.243437	0.858392	0.936971	0.820658	0.871455	0.892454	1.09497	0.528493	0.763686
PLEKHG3	1349	6006	12	0	4	8	112	4	33	73	0.652167	0.554906	0.342042	0.289832	0.512175	0.489534	0.858392	0.893245	0.948231	0.958965	0.809995	0.920449	0.471027	0.380476
TMF1	1597	5835	18	1	4	13	97	16	19	61	0.279911	0.617146	0.342238	0.239257	0.217322	0.105525	0.858392	0.885152	0.820658	0.737297	0.854354	1.02384	0.485075	0.577369
CSF1R	1084	6014	23	0	7	16	109	11	30	68	0.139829	0.597883	0.342663	0.325366	0.320159	0.413772	0.858392	0.905784	0.927191	0.93552	1.03737	1.08923	0.609662	0.687873
SRCAP	443	6318	15	2	3	10	417	56	99	260	0.747927	0.740249	0.343021	0.451543	0.462804	0.74171	0.858392	0.936971	0.948231	1	1.24267	1.04686	0.728685	0.670755
NOL8	1202	6115	13	0	4	9	96	10	13	73	0.135613	0.157219	0.343382	0.258494	0.256258	0.434392	0.858392	0.889368	0.867967	0.944364	0.629908	1.63668	0.311946	0.968021
ANO10	1705	5797	15	3	1	11	67	20	13	34	0.865925	0.97431	0.344114	0.465912	0.326391	0.280948	0.858392	0.936971	0.927191	0.877635	4.75144	1.06837	0.987237	0.633735
ERAP2	1375	5890	12	1	6	5	72	9	20	43	0.354602	0.132309	0.344225	0.195077	0.165011	0.145318	0.858392	0.845095	0.820658	0.771071	0.317254	0.76141	0.04606	0.186418
DVL2	2253	5287	20	1	8	11	65	3	14	48	0.568562	0.0862961	0.345614	0.123849	0.246787	0.163889	0.860049	0.782988	0.864117	0.784422	0.556318	1.41608	0.15218	0.904745
UBE4A	1399	5937	21	3	6	12	93	10	21	62	0.685612	0.334308	0.346919	0.297847	0.243225	0.0822602	0.861307	0.894017	0.857049	0.737297	0.82106	1.20646	0.424685	0.808293
WDR81	2100	5401	16	0	3	12	137	14	35	77	0.381719	0.887158	0.34757	0.457758	0.473538	0.280839	0.861307	0.936971	0.948231	0.877635	1.8467	1.08164	0.897962	0.683866
FNDC3A	1683	5404	16	2	5	9	98	6	18	72	0.758642	0.164245	0.354857	0.356432	0.37546	0.0619953	0.875788	0.907654	0.948231	0.737297	0.571256	1.23772	0.225873	0.82578
GLG1	1557	5669	24	2	7	15	100	15	25	60	0.3235	0.508057	0.35489	0.480806	0.43851	0.711193	0.875788	0.939276	0.948231	1	0.869308	0.944989	0.453359	0.444164
AKAP13	896	6405	33	2	8	23	291	38	68	180	0.261863	0.648539	0.357122	0.226244	0.314116	0.29506	0.877061	0.874262	0.927191	0.877635	0.967971	0.925266	0.535983	0.312384
USP48	1437	6080	14	2	5	7	121	14	28	79	0.58758	0.208519	0.357453	0.49273	0.475339	0.407953	0.877061	0.949465	0.948231	0.93552	0.564616	0.99704	0.226302	0.530226
PIGG	1198	6164	22	2	9	11	102	3	28	69	0.897237	0.126292	0.357654	0.486482	0.641101	0.509672	0.877061	0.942235	0.986255	0.958965	0.595412	1.0158	0.164149	0.566063
IPO7	1192	6282	17	0	3	13	86	7	17	62	0.389744	0.708856	0.359386	0.784139	0.487103	0.409299	0.877061	1	0.948231	0.93552	1.23098	1.13628	0.721236	0.721067
MYH14	876	6169	14	0	3	10	210	10	62	136	0.646872	0.823019	0.35965	0.866316	0.250285	0.340067	0.877061	1	0.866972	0.887816	1.39958	0.961646	0.788015	0.424562
DAAM1	1268	6075	11	0	1	9	117	12	28	76	0.707317	0.954023	0.359839	0.538043	0.771851	0.334277	0.877061	0.956693	1	0.887816	2.88103	0.971776	0.937786	0.483831
MRVI1	1172	6290	12	1	3	8	72	7	14	51	0.618182	0.466248	0.361984	0.274917	0.34524	0.302738	0.877671	0.892785	0.932988	0.877635	1.10979	1.4533	0.668777	0.921544
TLR2	1351	6225	15	1	5	9	59	5	14	39	0.547149	0.353094	0.362665	0.278319	0.187057	0.255677	0.877671	0.892785	0.820658	0.877635	0.620201	1.03367	0.27707	0.59343
CAMTA2	2143	5382	21	5	4	12	123	28	25	69	0.69326	0.658838	0.36349	0.422268	0.46428	0.693617	0.877671	0.918008	0.948231	1	1.19052	1.1136	0.707742	0.714704
TP53	2282	5260	530	215	22	269	715	304	21	356	0.139852	0.189123	0.363528	0.344309	0.36135	0.777859	0.877671	0.905784	0.936362	1	5.93999	8.04799	1	1
COL5A3	772	6415	21	3	4	14	261	19	71	171	0.955412	0.81754	0.363815	0.849611	0.879244	0.911817	0.877671	1	1	1	1.41245	0.960202	0.806083	0.409273
PDCD4	1467	6039	10	1	4	5	51	2	8	41	0.758242	0.0772509	0.364967	0.468704	0.626546	0.546803	0.877671	0.936971	0.986255	0.978966	0.359112	1.50827	0.119337	0.897046
PHF3	818	6302	15	0	3	12	241	42	47	148	0.156076	0.739957	0.365775	0.357779	0.575806	0.405202	0.877671	0.907654	0.976789	0.93552	1.06425	0.956695	0.639069	0.420562
TTC17	843	6540	16	1	3	12	132	6	30	95	0.865653	0.737898	0.366105	0.746633	0.819762	0.562693	0.877671	0.998859	1	0.984813	1.46746	1.11753	0.81021	0.733819
CDCA2	2291	4780	11	0	2	9	46	5	10	31	0.485294	0.793329	0.366744	0.353066	0.451431	0.429622	0.877671	0.905784	0.948231	0.944364	1.27419	0.991037	0.734984	0.548153
SMARCAL1	701	6648	10	0	2	8	107	10	23	73	0.504202	0.736274	0.367629	0.231112	0.0774176	0.270611	0.87802	0.882091	0.718857	0.877635	1.57369	1.40263	0.821189	0.942407
ENTPD4	2317	4758	10	0	5	5	48	6	18	24	0.283348	0.474923	0.369389	0.389176	0.44502	0.292773	0.879357	0.913995	0.948231	0.877635	0.359701	0.539551	0.096276	0.0329948
DCHS1	1216	6271	49	4	15	29	397	33	98	253	0.472525	0.246012	0.369671	0.33614	0.517277	0.0966494	0.879357	0.905784	0.948231	0.737297	0.863263	1.13378	0.372263	0.869231
INTS6	1659	5426	13	0	1	11	70	7	11	52	0.631579	0.897855	0.372845	0.413985	0.653342	0.849999	0.883846	0.915084	0.986255	1	3.26387	1.53753	0.955755	0.9329
TRERF1	522	6269	10	2	4	4	119	18	23	76	0.488482	0.1086	0.373135	0.207133	0.49817	0.247517	0.883846	0.863091	0.948231	0.871818	0.50738	1.41184	0.244966	0.945259
INPP5F	1447	6047	15	3	3	9	124	20	27	75	0.783846	0.661191	0.375246	0.378543	0.48185	0.351354	0.883846	0.911538	0.948231	0.889014	1.17744	0.975251	0.698425	0.491817
COL17A1	1517	6010	16	1	7	8	101	11	35	54	0.424589	0.396262	0.378332	0.189372	0.36358	0.082902	0.883846	0.835629	0.936362	0.737297	0.431354	0.657816	0.0874433	0.0329564
TNKS1BP1	608	6722	11	0	4	7	216	29	58	128	0.208722	0.474685	0.37886	0.191668	0.210752	0.330479	0.883846	0.839518	0.820658	0.887816	0.641217	0.85285	0.337743	0.174817
PHRF1	1284	6176	24	2	8	13	188	7	55	117	0.895614	0.367888	0.379095	0.381007	0.542918	0.502316	0.883846	0.911538	0.958879	0.958965	0.66965	0.89911	0.249405	0.281688
NYNRIN	1084	6170	29	1	9	19	244	27	75	141	0.230923	0.679833	0.379458	0.752752	0.280356	0.457492	0.883846	0.998859	0.898158	0.951039	0.941601	0.85874	0.510019	0.156837
KIAA1109	1268	6328	68	3	12	53	500	53	106	338	0.225768	0.870751	0.379735	0.395319	0.120711	0.0340567	0.883846	0.913995	0.775507	0.727131	1.27911	0.95416	0.82112	0.352352
DNM2	735	6409	13	0	5	7	142	17	48	74	0.237105	0.553036	0.381713	0.466196	0.512636	0.417618	0.883846	0.936971	0.948231	0.93885	0.642922	0.794085	0.316081	0.119748
WWC1	1092	5969	10	1	2	6	120	20	32	67	0.677149	0.788802	0.382374	0.288879	0.451218	0.627635	0.883846	0.893245	0.948231	1	1.41692	1.01208	0.782118	0.558504
KIAA0232	1193	6218	14	2	2	10	132	16	27	89	0.850172	0.80697	0.382709	0.464013	0.730664	0.474063	0.883846	0.936971	0.986255	0.958965	1.35482	1.01361	0.760697	0.559608
DLG5	1232	6130	27	3	12	12	183	8	58	114	0.885718	0.0929644	0.382955	0.350748	0.527319	0.344511	0.883846	0.905784	0.948376	0.887816	0.528355	0.921368	0.0782572	0.330845
FRMD4A	1013	5978	10	1	1	7	141	32	34	71	0.768218	0.95418	0.384169	0.636293	0.423209	0.231247	0.883846	0.994374	0.948231	0.858603	3.10416	1.00429	0.946938	0.543975
AASDH	868	6517	10	3	3	4	70	10	15	44	0.817628	0.285431	0.384662	0.297734	0.178338	0.28124	0.883846	0.894017	0.820658	0.877635	0.725039	0.994339	0.435279	0.540973
PLEKHG4	1477	5736	11	1	3	7	77	9	22	46	0.680863	0.685146	0.38482	0.381845	0.454236	0.458893	0.883846	0.911538	0.948231	0.952284	0.947497	0.904429	0.586787	0.390666
DOCK8	1795	5348	51	2	15	34	184	21	55	108	0.143464	0.717048	0.3849	0.216711	0.271977	0.108925	0.883846	0.863091	0.897219	0.737297	0.940055	0.805761	0.473562	0.111457
PABPC3	1462	5651	19	4	4	10	121	23	20	76	0.578133	0.362351	0.385216	0.421002	0.487209	0.435456	0.883846	0.918008	0.948231	0.944616	0.929628	1.255	0.545403	0.848629
ATM	1390	5957	62	14	7	41	398	94	53	246	0.681424	0.7655	0.385582	0.71419	0.982849	0.63239	0.883846	0.998286	1	1	2.08735	1.66515	0.984102	0.999886
PTPN13	1215	6362	28	3	6	19	208	23	53	131	0.724362	0.765412	0.385705	0.373222	0.239439	0.213171	0.883846	0.911538	0.850939	0.836697	1.10461	0.852618	0.657328	0.179275
DSE	1543	5863	28	2	9	16	116	7	25	84	0.583187	0.136607	0.387348	0.531928	0.38456	0.231468	0.885232	0.955217	0.948231	0.858603	0.738803	1.34462	0.2909	0.925042
ARHGAP21	1021	6051	21	2	3	16	184	30	41	113	0.649481	0.909442	0.388666	0.801018	0.568293	0.713953	0.885232	1	0.973137	1	1.95107	1.06278	0.918743	0.66151
RBMXL1	1199	6217	22	5	5	12	70	10	11	46	0.694085	0.282261	0.388946	0.605861	0.336973	0.388681	0.885232	0.977554	0.928559	0.928298	0.726551	1.15588	0.351526	0.716623
THBS2	1580	5823	36	3	12	21	222	15	75	132	0.7635	0.566388	0.389595	0.466475	0.552127	0.560184	0.885232	0.936971	0.961466	0.98426	0.773322	0.79863	0.291806	0.0677568
IL16	923	6423	15	0	6	9	118	9	37	71	0.299455	0.432761	0.39026	0.561013	0.583839	0.341642	0.885232	0.971535	0.978031	0.887816	0.580331	0.773775	0.21917	0.121698
MAP2K3	1748	5570	19	1	6	12	88	4	30	54	0.804496	0.672889	0.392153	0.567963	0.460269	0.881459	0.885232	0.971535	0.948231	1	0.867264	0.809447	0.474873	0.205053
ATP9B	1920	5495	26	3	5	18	96	9	23	64	0.829638	0.762651	0.392462	0.494946	0.84527	0.523008	0.885232	0.94954	1	0.961007	1.54171	1.23478	0.864782	0.839787
KIAA0020	1797	5360	14	1	4	9	55	9	11	35	0.313439	0.431106	0.392833	0.281283	0.197988	0.109704	0.885232	0.892785	0.820658	0.737297	0.849191	1.14255	0.491141	0.703371
DALRD3	1792	5724	12	2	3	7	36	3	7	26	0.833167	0.424712	0.393022	0.409675	0.280468	0.509596	0.885232	0.913995	0.898158	0.958965	0.975664	1.41123	0.598716	0.844104
WRN	2071	4931	35	2	8	24	115	14	25	70	0.289095	0.641551	0.394513	0.329396	0.11398	0.314168	0.885859	0.905784	0.775507	0.88369	0.886023	0.873264	0.449316	0.31319
ANKRD50	1277	6323	22	2	1	19	171	23	27	121	0.901818	0.979635	0.394793	0.461102	0.789083	0.642535	0.885859	0.936971	1	1	6.00319	1.42933	0.99604	0.96739
KIF2A	1361	5941	12	1	0	11	51	8	4	37	1	1	0.396065	0.658816	0.280263	0.571473	0.887036	0.996691	0.898158	0.986506	Inf	2.48685	1	0.98424
DYNC2H1	1226	6036	34	5	9	20	121	17	20	84	0.369065	0.134982	0.396991	0.219009	0.118655	0.251788	0.887436	0.863667	0.775507	0.873416	0.666917	1.26866	0.204197	0.861519
ABL1	1169	6089	14	1	5	7	149	9	54	78	0.793488	0.594361	0.397793	0.562515	0.553228	0.538361	0.887558	0.971535	0.961466	0.97313	0.684823	0.657874	0.344869	0.0114834
HIVEP2	1464	5941	42	2	9	31	267	28	74	165	0.399215	0.900464	0.406815	0.185616	0.297302	0.245946	0.892965	0.829587	0.900725	0.871455	1.10759	0.782171	0.665539	0.0456403
ZFHX3	1543	5683	63	12	20	29	540	73	131	288	0.654286	0.117664	0.408188	0.181605	0.361359	0.340321	0.892965	0.825921	0.936362	0.887816	0.672721	0.942474	0.104821	0.300896
LONP2	1215	5923	12	0	2	10	89	9	17	62	0.452381	0.769299	0.40835	0.436297	0.814448	0.8872	0.892965	0.931098	1	1	1.84046	1.45072	0.873996	0.936949
NOL6	1417	5797	19	2	6	11	120	17	33	70	0.475622	0.495926	0.410344	0.241023	0.220689	0.236101	0.892965	0.885152	0.820658	0.863214	0.963712	1.0648	0.556008	0.653207
PIK3AP1	1527	6032	26	1	6	19	86	12	28	46	0.363537	0.936388	0.41107	0.205141	0.470717	0.395196	0.892965	0.863091	0.948231	0.930161	1.34953	0.737422	0.803515	0.120937
HJURP	862	6510	10	1	1	8	71	4	11	54	0.926471	0.816451	0.412321	0.461683	0.523572	0.367585	0.892965	0.936971	0.948231	0.910906	2.6017	1.68519	0.920671	0.964544
MDC1	522	6240	12	1	4	7	198	19	49	129	0.580958	0.37155	0.413098	0.593147	0.172369	0.271421	0.892965	0.977554	0.820658	0.877635	0.724335	1.03476	0.400792	0.608815
INF2	1243	5977	14	1	2	11	118	25	39	54	0.667571	0.988591	0.413534	0.637174	0.713019	0.761319	0.892965	0.994374	0.986255	1	2.57929	0.685405	0.952147	0.0447987
KIFC3	1443	5792	11	0	2	9	56	5	10	40	0.485294	0.694447	0.41354	0.332412	0.394473	0.434015	0.892965	0.905784	0.948231	0.944364	2.07578	1.98353	0.906373	0.987012
EPB41L4B	1169	6125	10	1	2	7	82	6	21	55	0.872414	0.761855	0.415143	0.477279	0.570277	0.741158	0.892965	0.939276	0.973137	1	1.37371	1.1027	0.769748	0.689754
HDLBP	914	6424	11	0	2	9	195	27	48	119	0.41866	0.867394	0.415335	0.181369	0.324273	0.0784299	0.892965	0.825921	0.927191	0.737297	1.74421	1.0659	0.856658	0.674332
CCNL2	1370	6009	12	2	3	6	70	8	19	42	0.838154	0.585028	0.415986	0.707004	0.471832	0.715718	0.892965	0.996691	0.948231	1	1.08295	1.00458	0.657786	0.553116
NNMT	1439	5929	11	0	4	7	40	4	13	23	0.397661	0.627312	0.4168	0.439363	0.628102	0.569837	0.892965	0.931098	0.986255	0.986001	0.817944	0.89884	0.484655	0.437025
HIPK3	861	6463	11	2	3	5	106	10	29	66	0.884207	0.477493	0.417267	0.436029	0.545967	0.304472	0.892965	0.931098	0.958879	0.877635	0.716943	0.75226	0.429111	0.120689
GUF1	1090	6393	10	1	3	6	61	6	13	42	0.648221	0.399062	0.41771	0.331778	0.231196	0.23962	0.892965	0.905784	0.834696	0.870857	0.732651	1.03859	0.44104	0.598803
BIRC6	298	6736	15	2	2	11	509	49	86	366	0.860156	0.740228	0.418062	0.554049	0.190686	0.327459	0.892965	0.971535	0.820658	0.887816	1.94626	1.49741	0.891495	0.999832
OXSR1	1609	5833	11	1	2	8	57	10	14	33	0.642735	0.844231	0.418156	0.540556	0.483249	0.627131	0.892965	0.959103	0.948231	1	1.25652	0.919956	0.730381	0.444837
SYNE1	1512	5914	219	17	58	144	1352	102	312	935	0.419635	0.151691	0.419779	0.27873	0.189017	0.296817	0.892965	0.892785	0.820658	0.877635	0.961423	1.13044	0.424146	0.973764
MYO1F	917	6341	13	0	3	10	169	8	61	100	0.698592	0.918262	0.4211	0.575349	0.714867	0.727235	0.892965	0.975717	0.986255	1	1.49498	0.764646	0.817758	0.0581609
UGGT2	1235	5665	22	2	5	15	128	21	21	85	0.263042	0.396271	0.422321	0.0841439	0.0763324	0.126358	0.892965	0.714607	0.718857	0.751849	0.928175	1.39502	0.526426	0.937307
RAPGEF2	1374	6192	24	2	4	18	181	20	32	129	0.589215	0.6683	0.422562	0.368969	0.544616	0.764664	0.892965	0.910923	0.958879	1	1.55905	1.35443	0.856643	0.952916
ZNF407	1888	5529	45	3	14	28	216	19	56	138	0.373671	0.343912	0.422836	0.524408	0.500445	0.437488	0.892965	0.955217	0.948231	0.945898	0.708143	0.921807	0.184833	0.325971
XAF1	2226	5314	10	0	3	7	18	0	5	13	1	0.614756	0.423077	0.529165	0.26398	0.490271	0.892965	0.955217	0.881919	0.958965	0.709925	0.79106	0.423731	0.414386
RC3H2	1124	6123	11	1	3	7	79	13	11	54	0.297778	0.275041	0.42339	0.0949929	0.303449	0.137036	0.892965	0.736971	0.914199	0.75702	0.807677	1.73467	0.48935	0.972599
NFAT5	1481	5728	20	2	5	13	138	23	30	78	0.374652	0.600257	0.423723	0.530999	0.333878	0.514448	0.892965	0.955217	0.928133	0.958965	0.737192	0.897863	0.364885	0.336015
FANCI	864	6374	13	0	4	9	116	8	25	83	0.359618	0.379128	0.424792	0.378909	0.33716	0.432541	0.892965	0.911538	0.928559	0.944364	0.77857	1.21803	0.439476	0.836183
SKI	1370	6009	10	0	5	5	44	1	21	22	0.814815	0.610954	0.42505	0.284591	0.374885	0.352589	0.892965	0.892785	0.948231	0.889014	0.491965	0.538819	0.205836	0.02972
NEO1	968	6445	14	1	2	11	145	15	33	97	0.771429	0.876514	0.42512	0.518405	0.773068	0.781567	0.892965	0.955217	1	1	2.04994	1.11815	0.905553	0.741873
RNF43	590	6097	17	8	1	8	180	101	20	57	0.806355	0.930485	0.425384	0.328239	0.416587	0.196784	0.892965	0.905784	0.948231	0.815549	4.43617	1.33085	0.983252	0.896924
TSHZ1	1895	5525	15	0	6	8	142	9	57	75	0.434882	0.616247	0.425653	0.692315	0.395493	0.670342	0.892965	0.996691	0.948231	1	0.620068	0.620068	0.265384	0.0045921
BCLAF1	1431	5947	69	4	13	52	269	36	49	183	0.117856	0.637596	0.426154	0.343415	0.231167	0.10248	0.892965	0.905784	0.834696	0.737297	1.06716	1.04655	0.631091	0.637157
COL11A1	1202	6230	43	6	8	29	267	29	33	205	0.51444	0.161571	0.428049	0.530984	0.308361	0.5785	0.892965	0.955217	0.919661	0.989999	1.21788	2.00408	0.747935	0.999981
HSPA8	1383	5971	16	0	4	9	88	8	21	58	0.30914	0.493367	0.428249	0.497938	0.353029	0.448821	0.892965	0.94954	0.936362	0.948438	0.753853	1.00514	0.418978	0.549883
STC1	2307	4763	13	1	5	7	38	1	13	24	0.921053	0.468467	0.428924	0.407366	0.260652	0.544151	0.892965	0.913995	0.87647	0.97569	0.56722	0.779149	0.246167	0.284489
MAP2K7	995	6303	10	2	4	4	77	9	17	50	0.670143	0.147094	0.428975	0.511075	0.49444	0.376318	0.892965	0.950857	0.948231	0.921609	0.690321	1.40771	0.391238	0.915586
MATR3	1111	6014	10	1	2	7	81	11	11	58	0.531304	0.464903	0.429091	0.612619	0.289128	0.348317	0.892965	0.982768	0.898158	0.889014	0.89751	1.49196	0.576065	0.920573
TEP1	1048	6177	24	2	8	14	294	40	80	174	0.314761	0.39971	0.430918	0.383967	0.386007	0.348573	0.892965	0.911538	0.948231	0.889014	0.701042	0.9414	0.277097	0.347197
SH3RF1	1382	6159	18	1	6	11	83	9	21	51	0.373769	0.411506	0.431618	0.34491	0.407548	0.50369	0.892965	0.905784	0.948231	0.958965	0.700211	0.982114	0.320449	0.515761
ELP2	1586	5784	15	3	4	8	53	10	18	25	0.786176	0.805375	0.431905	0.369842	0.336199	0.251378	0.892965	0.910923	0.928559	0.873416	0.769307	0.564159	0.426531	0.0389621
C10orf2	1514	6016	15	0	3	12	76	14	21	41	0.239924	0.91605	0.432135	0.243671	0.191949	0.351038	0.892965	0.885152	0.820658	0.889014	1.59852	0.970528	0.846639	0.498515
TNK1	2263	5278	10	1	4	5	32	3	9	20	0.670168	0.360483	0.432733	0.45198	0.252725	0.272867	0.892965	0.936971	0.866972	0.877635	0.526641	0.93625	0.262209	0.504375
PDE4A	748	6403	10	1	2	7	108	6	34	68	0.935905	0.854948	0.433698	0.740552	0.67958	0.649041	0.892965	0.998859	0.986255	1	1.70546	0.87781	0.848998	0.299096
SLFN11	951	6105	11	1	3	7	134	7	35	91	0.865907	0.566108	0.435642	0.464982	0.650697	0.372497	0.892965	0.936971	0.986255	0.918501	0.901492	0.946566	0.552976	0.422717
HYOU1	1383	5961	11	0	2	9	99	7	20	72	0.568966	0.732024	0.43567	0.464046	0.621785	0.859867	0.892965	0.936971	0.986255	1	1.8834	1.5695	0.880255	0.975565
TCF12	1160	6373	16	3	1	11	95	29	12	53	0.75865	0.910632	0.435811	0.280726	0.117876	0.10042	0.892965	0.892785	0.775507	0.737297	3.19366	1.40327	0.953056	0.891093
PDGFRB	1079	6023	22	0	7	15	165	7	55	102	0.455832	0.69875	0.435822	0.761801	0.530838	0.535415	0.892965	1	0.949802	0.97177	0.982855	0.892313	0.564689	0.27129
AKAP12	1509	5897	20	2	8	10	192	26	63	102	0.421624	0.391043	0.436941	0.324112	0.332758	0.359304	0.892965	0.905784	0.927191	0.89783	0.473901	0.618191	0.0877209	0.00180935
COL5A1	1171	6075	56	2	15	38	371	32	114	225	0.265253	0.821882	0.437064	0.291389	0.500712	0.388281	0.892965	0.893245	0.948231	0.928298	0.957347	0.785634	0.495037	0.02091
SMYD4	2103	5401	17	0	5	11	54	4	18	32	0.416809	0.737928	0.437079	0.528405	0.598435	0.429204	0.892965	0.955217	0.986255	0.944364	0.815959	0.70057	0.444444	0.142543
LMO7	1411	5580	22	2	5	15	205	26	40	139	0.451264	0.488107	0.438691	0.226851	0.319868	0.125209	0.894719	0.874262	0.927191	0.751849	0.92695	1.11524	0.52541	0.755737
ATG2B	1294	6000	24	4	8	12	201	19	40	142	0.668274	0.0688569	0.439946	0.678872	0.203093	0.259528	0.89574	0.996691	0.820658	0.877635	0.584229	1.17625	0.158576	0.841118
PER3	1439	5959	15	2	4	9	110	13	27	70	0.703416	0.52746	0.442132	0.352332	0.409818	0.430666	0.897333	0.905784	0.948231	0.944364	0.846981	1.12931	0.494105	0.740795
PDPR	1473	5735	11	0	2	9	108	6	27	75	0.682353	0.830326	0.442241	0.303502	0.364444	0.125442	0.897333	0.894017	0.936362	0.751849	1.73452	1.11352	0.854845	0.718954
NFKB1	1270	6353	12	1	4	7	76	6	21	49	0.70356	0.457364	0.44462	0.35097	0.281527	0.227221	0.899205	0.905784	0.898158	0.858603	0.624862	0.918164	0.323381	0.412669
GOLGA3	651	6432	12	0	2	10	177	10	45	121	0.677318	0.874916	0.445184	0.402023	0.579326	0.506607	0.899205	0.913995	0.976789	0.958965	2.04075	1.17003	0.90297	0.839248
METTL3	1065	6181	19	0	3	16	48	5	7	36	0.263736	0.651891	0.445436	0.402167	0.643653	0.380378	0.899205	0.913995	0.986255	0.923332	1.7897	1.91753	0.890921	0.969138
NCKAP1L	402	6602	10	0	3	7	182	6	54	122	0.736824	0.639734	0.447852	0.748417	0.82837	0.751261	0.902548	0.998859	1	1	0.922325	0.922325	0.571472	0.335695
IFNGR1	1427	5946	12	5	2	4	62	18	10	34	0.783401	0.447225	0.449132	0.584035	0.585232	0.727141	0.903593	0.977554	0.978031	1	1.31334	1.24767	0.749559	0.782315
MEX3C	1858	5595	12	1	3	3	26	1	7	15	0.909091	0.357796	0.45029	0.636815	0.579214	0.52013	0.904391	0.994374	0.976789	0.960846	0.406563	0.871206	0.235678	0.460306
STK11IP	728	6617	12	0	4	8	106	8	32	65	0.433919	0.607134	0.452773	0.32517	0.364448	0.443977	0.90784	0.905784	0.936362	0.948438	0.836541	0.901896	0.491764	0.349581
THBS1	1342	6221	27	2	6	18	158	16	53	87	0.724831	0.928602	0.454689	0.781905	0.823065	0.631802	0.910146	1	1	1	1.13788	0.65764	0.68208	0.0101176
HECTD1	1075	6142	14	1	2	11	204	16	47	138	0.83951	0.877648	0.457686	0.387154	0.675062	0.465569	0.91229	0.913995	0.986255	0.954456	1.54295	0.889359	0.813329	0.266055
SECISBP2	1195	6142	11	0	1	10	69	7	16	45	0.708333	0.96041	0.458059	0.443258	0.367129	0.721376	0.91229	0.932508	0.940658	1	3.19326	0.977935	0.952562	0.516812
PLAA	1743	5459	12	2	3	7	60	4	17	39	0.93758	0.641256	0.458066	0.576224	0.687558	0.68861	0.91229	0.975717	0.986255	1	0.933812	0.750712	0.569292	0.197346
HDAC4	877	6472	16	4	6	5	158	17	45	96	0.880536	0.116831	0.461073	0.456587	0.41767	0.571791	0.915569	0.936971	0.948231	0.986506	0.549191	1.04608	0.209434	0.62941
SPRED1	1334	6225	15	5	2	8	58	10	11	36	0.939614	0.729121	0.461657	0.675933	0.750987	0.463397	0.915569	0.996691	0.993782	0.954456	1.22239	1.08657	0.716373	0.649333
ZNF462	1178	6113	22	3	5	14	280	20	75	184	0.928043	0.684775	0.462027	0.819941	0.660511	0.603573	0.915569	1	0.986255	1	1.08603	0.926746	0.646859	0.30939
RAP1GAP	1440	6080	12	1	6	5	88	3	32	53	0.877111	0.224646	0.46378	0.480176	0.439295	0.581181	0.915757	0.939276	0.948231	0.989999	0.364405	0.737919	0.0831289	0.106911
CDKN2A	1511	5008	59	28	2	26	52	21	1	28	0.616742	0.486603	0.464342	0.456835	0.412797	0.452989	0.915757	0.936971	0.948231	0.948438	4.67074	10.5468	0.998162	0.999924
FAM160A2	1224	6264	19	4	8	7	110	14	25	71	0.579242	0.0359298	0.465533	0.25983	0.204045	0.45208	0.915757	0.890707	0.820658	0.948438	0.404579	1.27847	0.0599185	0.882708
DNAH2	2272	5278	10	0	3	7	28	1	7	20	0.727273	0.554423	0.466672	0.592645	0.446773	0.548543	0.915757	0.977554	0.948231	0.97933	0.937572	1.14805	0.580805	0.692658
DDHD1	1153	6148	14	0	2	10	93	7	20	60	0.568966	0.839474	0.468121	0.130456	0.373112	0.448314	0.915757	0.782988	0.946334	0.948438	1.73691	1.11162	0.855628	0.699532
AHNAK2	1248	5978	93	3	31	59	832	60	272	496	0.127535	0.614332	0.470086	0.302041	0.666522	0.448801	0.915757	0.894017	0.986255	0.948438	0.839232	0.810654	0.245206	0.00311053
SBF2	1184	6292	26	4	6	16	161	11	29	120	0.875095	0.27693	0.470533	0.573632	0.562643	0.5	0.915757	0.975717	0.966508	0.958965	1.07664	1.42562	0.6373	0.969231
EGR1	1103	6024	11	0	2	9	76	13	20	40	0.388235	0.918014	0.470612	0.486597	0.409858	0.848313	0.915757	0.942235	0.948231	1	2.00341	0.957183	0.897332	0.482934
DLC1	2225	4820	60	3	15	41	181	17	41	123	0.228386	0.459607	0.470759	0.331241	0.193478	0.270461	0.915757	0.905784	0.820658	0.877635	1.01792	1.18989	0.573998	0.855518
LRCH1	1681	5399	11	1	2	8	76	6	19	50	0.854701	0.808559	0.471792	0.657732	0.864558	0.652785	0.915757	0.996691	1	1	1.61233	1.01831	0.829823	0.571535
ITSN1	942	6322	14	2	3	7	207	32	56	118	0.744993	0.676478	0.471943	0.625739	0.558713	0.38666	0.915757	0.991659	0.963942	0.928298	0.926667	0.78808	0.568956	0.0819872
PAPLN	1360	6013	11	1	2	8	104	1	35	68	0.995951	0.899727	0.473516	0.743198	0.889431	0.674142	0.915757	0.998859	1	1	1.55356	0.754585	0.816493	0.107375
MLPH	857	6498	11	0	2	9	43	2	17	23	0.814286	0.971554	0.473636	0.509	0.681465	0.495392	0.915757	0.949974	0.986255	0.958965	1.79872	0.564304	0.866431	0.0522518
JMY	1434	5907	16	0	2	7	122	14	16	45	0.308468	0.73514	0.474196	0.323036	0.284899	0.514626	0.915757	0.905784	0.898158	0.958965	1.21902	1.21902	0.719209	0.796051
USP20	1169	6094	15	2	5	8	95	6	32	55	0.905668	0.567474	0.476494	0.566762	0.323466	0.274267	0.915757	0.971535	0.927191	0.877635	0.803014	0.808591	0.443628	0.195877
ZNF532	1866	5589	26	3	11	12	155	9	50	96	0.83375	0.152333	0.476973	0.291194	0.660025	0.63882	0.915757	0.893245	0.986255	1	0.416432	0.718826	0.0287325	0.0360449
NLRP1	2177	5361	25	5	7	13	82	10	20	52	0.807409	0.356322	0.477774	0.528213	0.467412	0.410822	0.915757	0.955217	0.948231	0.93552	0.928491	1.1374	0.51314	0.72893
ADCY7	1316	5871	11	2	4	5	121	8	39	73	0.926752	0.402841	0.477879	0.602023	0.537232	0.494649	0.915757	0.977554	0.953206	0.958965	0.636411	1.0052	0.359637	0.545368
GAK	1198	6164	17	2	4	10	138	17	32	89	0.661732	0.542837	0.478312	0.733988	0.578031	0.692171	0.915757	0.998859	0.976789	1	1.30235	1.28878	0.761435	0.911935
THOP1	1293	6103	13	0	5	8	63	3	22	38	0.566502	0.570035	0.478788	0.369572	0.427204	0.335386	0.915757	0.910923	0.948231	0.887816	0.732865	0.811981	0.388692	0.256495
NFATC3	1486	5731	12	0	3	9	108	9	23	76	0.39725	0.568102	0.479326	0.315766	0.40614	0.560539	0.915757	0.905784	0.948231	0.98426	0.874617	1.05208	0.530777	0.622566
UBR4	1427	6074	37	0	11	25	472	34	134	298	0.091398	0.589184	0.479362	0.455736	0.693762	0.807808	0.915757	0.936971	0.986255	1	0.902484	0.939391	0.450123	0.287856
FLT1	1432	5645	37	1	11	25	223	16	57	150	0.253437	0.424097	0.480969	0.379952	0.58151	0.334589	0.915757	0.911538	0.978031	0.887816	0.804947	1.00039	0.331526	0.526859
PTGFRN	1087	6200	12	2	3	7	102	7	30	65	0.942826	0.664988	0.481357	0.396486	0.533535	0.690714	0.915757	0.913995	0.949802	1	1.15368	1.00947	0.692329	0.55481
DIP2A	1051	6161	26	2	7	17	174	12	55	106	0.788784	0.75945	0.481714	0.421793	0.52916	0.449626	0.915757	0.918008	0.949802	0.948438	1.15464	0.906219	0.697662	0.301147
UACA	969	6464	21	2	2	17	153	27	29	97	0.719001	0.948213	0.48218	0.691652	0.674648	0.634138	0.915757	0.996691	0.986255	1	2.521	1.14544	0.952289	0.771685
CELSR2	1180	6199	36	1	6	28	322	13	94	198	0.794624	0.978094	0.484112	0.474231	0.895819	0.894488	0.91672	0.936971	1	1	2.18358	0.975642	0.980531	0.443274
DST	553	6364	59	8	13	38	724	105	149	463	0.481052	0.484933	0.484232	0.857679	0.445189	0.372972	0.91672	1	0.948231	0.918501	1.06795	1.12447	0.632714	0.90602
MUC16	870	6355	145	19	32	94	656	73	149	431	0.777674	0.567188	0.48567	0.890525	0.641285	0.605001	0.917977	1	0.986255	1	1.16109	1.2094	0.796537	0.982205
PCDH18	1261	6332	12	0	1	10	146	8	41	97	0.84	0.977537	0.488995	0.685557	0.650033	0.75865	0.922793	0.996691	0.986255	1	3.29008	0.794434	0.956228	0.127221
SH3PXD2A	1512	6021	14	3	3	8	124	15	30	78	0.893557	0.63566	0.491493	0.418996	0.608675	0.644453	0.926035	0.917985	0.986255	1	1.33922	1.22018	0.767323	0.850296
BBS7	1266	6328	15	1	3	11	83	8	21	54	0.704839	0.794726	0.494181	0.667579	0.54158	0.668594	0.929624	0.996691	0.958879	1	1.21073	0.850393	0.712842	0.30038
MAP4	1770	5742	15	1	5	9	82	7	19	55	0.523761	0.318378	0.497489	0.264227	0.272869	0.171504	0.932953	0.892785	0.897219	0.795215	0.64912	1.15779	0.30385	0.749765
ITPRIP	1521	6015	16	2	8	6	73	3	29	41	0.921836	0.215378	0.497788	0.60532	0.663314	0.432786	0.932953	0.977554	0.986255	0.944364	0.420941	0.680141	0.0770184	0.0726199
DHX37	608	6470	12	1	4	6	136	5	35	74	0.875183	0.424767	0.498308	0.568843	0.477061	0.484211	0.932953	0.971535	0.948231	0.958965	0.788767	1.00447	0.461785	0.5441
BRWD1	1094	6130	25	1	3	21	207	31	33	143	0.352886	0.849898	0.500618	0.415169	0.0977255	0.301278	0.934663	0.915996	0.730475	0.877635	2.00396	1.30837	0.92797	0.935797
CUX1	355	5507	11	0	4	7	208	33	61	112	0.187427	0.587604	0.500974	0.206876	0.160849	0.20007	0.934663	0.863091	0.812457	0.816264	0.749225	0.912405	0.429803	0.301715
TGIF1	1186	5833	16	8	2	6	43	20	3	20	0.485122	0.385037	0.5036	0.522065	0.481573	0.680455	0.934663	0.955217	0.948231	1	1.35549	2.71099	0.764317	0.97998
ZCCHC11	1024	6340	15	0	3	12	181	29	35	116	0.176099	0.714152	0.50363	0.538243	0.505731	0.461473	0.934663	0.956693	0.948231	0.952879	1.24934	1.16902	0.729918	0.818621
TLE4	1219	6144	20	2	7	11	102	7	30	65	0.764728	0.362981	0.505244	0.429528	0.384422	0.641384	0.934663	0.925045	0.948231	1	0.700331	0.842193	0.294623	0.248839
ARHGEF17	693	6300	12	1	3	8	191	17	53	116	0.752851	0.72279	0.506261	0.52525	0.675644	0.227064	0.934663	0.955217	0.986255	0.858603	1.14205	0.977743	0.686877	0.474122
NPEPPS	737	6192	10	0	1	9	62	5	8	47	0.642857	0.801093	0.509903	0.651345	0.724622	0.892699	0.934663	0.996691	0.986255	1	2.91889	2.10809	0.939734	0.988961
ZNF644	1212	6210	12	0	1	10	149	18	29	98	0.625	0.940029	0.511093	0.476316	0.614972	0.455374	0.934663	0.939182	0.986255	0.949725	2.90477	1.08178	0.939501	0.678442
SPEN	1391	6043	52	15	13	24	438	78	109	249	0.916592	0.338535	0.511466	0.738755	0.631858	0.588622	0.934663	0.998859	0.986255	0.991147	0.749338	0.943356	0.244033	0.320028
SMARCC2	382	6554	16	5	4	7	154	31	31	89	0.746644	0.331052	0.511892	0.396061	0.505476	0.443187	0.934663	0.913995	0.948231	0.948438	0.922829	1.20265	0.546577	0.840924
LIG3	958	6086	11	2	2	7	94	14	22	58	0.833023	0.759129	0.512619	0.338155	0.319436	0.682077	0.934663	0.905784	0.927191	1	1.67417	1.0992	0.843001	0.687895
TSC22D1	1669	5411	11	0	1	8	92	9	20	57	0.7	0.930485	0.512747	0.66371	0.492254	0.566195	0.934663	0.996691	0.948231	0.984813	2.77237	1.03964	0.931291	0.60211
MCM3AP	1052	6160	19	1	6	12	204	28	56	119	0.281018	0.548957	0.513313	0.514366	0.496228	0.393901	0.934663	0.95222	0.948231	0.930161	0.761302	0.863262	0.374809	0.200901
PLXNB1	1788	5724	23	2	8	13	178	12	51	114	0.709029	0.331374	0.513703	0.704187	0.459034	0.485945	0.934663	0.996691	0.948231	0.958965	0.74895	0.998601	0.327638	0.525576
TRPM7	1176	6341	11	1	3	7	155	13	25	115	0.592683	0.278957	0.514103	0.560348	0.685924	0.72754	0.934663	0.971535	0.986255	1	0.724253	1.34711	0.427647	0.931819
ZNF33B	1006	6299	13	1	2	10	98	10	23	65	0.784314	0.858552	0.514722	0.536912	0.22049	0.687561	0.934663	0.956693	0.820658	1	1.72579	1.00956	0.853784	0.555024
CCDC88C	1291	6000	16	2	5	6	140	5	44	88	0.965136	0.307169	0.516924	0.277397	0.45908	0.168879	0.934663	0.892785	0.948231	0.79233	0.597295	0.90176	0.273847	0.315065
RRP9	1814	5713	10	1	4	5	45	2	14	26	0.87218	0.4328	0.517847	0.616587	0.746684	0.708251	0.934663	0.987704	0.99224	1	0.494996	0.763708	0.233915	0.254064
ZZEF1	2123	5393	44	6	14	24	252	18	78	154	0.919901	0.414077	0.518101	0.437612	0.611582	0.416108	0.934663	0.931098	0.986255	0.93723	0.79294	0.804859	0.287276	0.067185
TMEM181	1575	5859	11	0	4	7	50	1	21	28	0.846154	0.765622	0.518377	0.804947	0.480615	0.771573	0.934663	1	0.948231	1	0.755874	0.575904	0.435256	0.0404503
ZNF445	1715	5791	24	0	4	20	113	9	23	81	0.297937	0.804393	0.519271	0.307944	0.557952	0.495436	0.934663	0.89851	0.963942	0.958965	1.52646	1.1548	0.846851	0.763397
MAP3K4	1590	5846	39	3	5	29	191	29	32	123	0.440498	0.848945	0.519643	0.684325	0.407723	0.512525	0.934663	0.996691	0.948231	0.958965	2.01604	1.44903	0.960662	0.979352
LPIN2	1185	5850	11	2	4	5	79	6	15	56	0.772555	0.13023	0.519751	0.329572	0.520235	0.568321	0.934663	0.905784	0.948231	0.984813	0.536829	1.38382	0.256622	0.898696
PPIL4	1525	5898	10	2	3	5	41	5	6	30	0.634615	0.196027	0.521941	0.36479	0.490496	0.679599	0.934663	0.910923	0.948231	1	0.655541	1.5452	0.381062	0.885196
NFX1	1423	5793	15	2	4	9	81	8	19	51	0.754727	0.513044	0.523097	0.365821	0.525195	0.341644	0.934663	0.910923	0.948231	0.887816	0.698109	0.914482	0.37154	0.411481
COL3A1	418	6761	17	1	4	12	300	32	57	210	0.422116	0.465529	0.523126	0.46207	0.270102	0.208878	0.934663	0.936971	0.895563	0.829224	0.902102	1.11028	0.52231	0.780269
PCNT	1051	6161	49	4	12	31	353	25	111	216	0.83651	0.831763	0.523751	0.744058	0.675303	0.64744	0.934663	0.998859	0.986255	1	1.01753	0.797521	0.577344	0.0298878
MPRIP	2117	5379	20	2	6	9	87	14	27	45	0.477063	0.537697	0.523928	0.575732	0.649765	0.511342	0.934663	0.975717	0.986255	0.958965	0.600278	0.696619	0.237804	0.0864613
WAPAL	1471	6038	15	1	1	13	103	13	21	67	0.855556	0.974635	0.524257	0.288272	0.735044	0.48518	0.934663	0.893245	0.986255	0.958965	4.18631	1.02522	0.980241	0.580078
TAF1C	1648	5589	13	2	4	7	98	17	35	46	0.698374	0.772649	0.524362	0.691029	0.567218	0.711736	0.934663	0.996691	0.972959	1	0.990385	0.603663	0.596819	0.0165904
PDIA3	1284	6266	11	2	3	6	43	4	13	26	0.899522	0.642095	0.525502	0.508719	0.46962	0.464031	0.934663	0.949974	0.948231	0.954456	0.793604	0.706395	0.48578	0.194462
SVEP1	1166	6128	27	3	7	17	169	15	38	116	0.697548	0.402358	0.526585	0.750831	0.677788	0.63514	0.934663	0.998859	0.986255	1	0.903276	1.09469	0.483146	0.715216
CDAN1	1315	6241	11	2	3	6	102	11	26	65	0.837612	0.51481	0.526771	0.759934	0.648511	0.450866	0.934663	1	0.986255	0.948438	0.954404	1.10124	0.590906	0.698717
TBC1D1	1163	6318	15	2	6	7	140	11	45	83	0.801275	0.308807	0.526842	0.607093	0.426274	0.412589	0.934663	0.977554	0.948231	0.93552	0.536505	0.699444	0.179534	0.0336522
KAT2B	1540	5846	17	3	5	9	97	16	28	53	0.683588	0.578441	0.527589	0.655437	0.649211	0.554024	0.934663	0.996691	0.986255	0.981113	0.702206	0.815061	0.346486	0.213284
FAM160B2	2312	4772	14	1	5	8	47	2	13	32	0.815789	0.367877	0.527707	0.407255	0.448126	0.440835	0.934663	0.913995	0.948231	0.948438	0.732549	1.127	0.388407	0.694555
SH3PXD2B	1041	5975	16	1	4	11	88	10	28	49	0.62013	0.845659	0.529174	0.501853	0.461305	0.45606	0.934663	0.94954	0.948231	0.949725	1.11027	0.764213	0.665777	0.151235
ARHGAP32	1369	5948	26	3	6	17	200	16	63	121	0.90346	0.845509	0.530357	0.431104	0.562357	0.775835	0.934663	0.925353	0.966508	1	0.985096	0.682791	0.565307	0.00908374
MAP2	641	6672	10	0	2	8	171	15	42	112	0.552893	0.803482	0.531178	0.467174	0.4371	0.234787	0.934663	0.936971	0.948231	0.862826	1.18622	0.868481	0.704611	0.240266
WDR19	1160	6325	11	0	2	9	86	8	32	46	0.651568	0.969493	0.531364	0.701712	0.666565	0.664785	0.934663	0.996691	0.986255	1	1.37793	0.468881	0.7687	0.000923675
MMP2	1394	5828	17	0	7	10	135	7	53	74	0.444096	0.615593	0.531506	0.480514	0.721342	0.644389	0.934663	0.939276	0.986255	1	0.594557	0.612506	0.207937	0.00440638
ZNF518B	1207	6238	18	0	1	17	119	13	33	73	0.723404	0.998153	0.533275	0.753916	0.678224	0.729199	0.935842	0.998859	0.986255	1	5.11618	0.711341	0.991224	0.065245
SYNJ1	975	6302	17	1	3	13	111	6	25	78	0.829011	0.783176	0.533753	0.53448	0.515754	0.879561	0.935842	0.956693	0.948231	1	1.33464	1.01022	0.764153	0.555101
TBC1D2	1207	6102	12	0	3	9	88	3	25	60	0.72881	0.735692	0.536753	0.566041	0.786609	0.270712	0.938984	0.971535	1	0.877635	1.35548	1.08438	0.773127	0.67197
INSR	1021	6287	23	0	8	15	184	11	58	115	0.272957	0.537774	0.537137	0.433476	0.287331	0.398864	0.938984	0.928766	0.898158	0.930161	0.801763	0.899449	0.37995	0.277485
KIF1C	2149	5381	20	2	4	14	97	9	28	59	0.836409	0.869612	0.538271	0.671098	0.651036	0.574617	0.938984	0.996691	0.986255	0.989942	1.388	0.892283	0.796562	0.344661
SMAD2	1776	5663	13	3	2	8	58	12	9	37	0.726087	0.636646	0.539307	0.675537	0.704985	0.510239	0.938984	0.996691	0.986255	0.958965	1.61569	1.50145	0.830627	0.904561
UTP20	584	6533	18	1	4	13	271	33	66	170	0.470599	0.742924	0.539902	0.505925	0.347027	0.857884	0.938984	0.949974	0.932988	1	1.11526	0.956683	0.666082	0.402381
DOCK2	1075	5975	48	2	12	34	260	17	76	167	0.529195	0.808378	0.540292	0.510703	0.507122	0.713436	0.938984	0.950857	0.948231	1	1.22125	0.948075	0.773254	0.371413
IGF2R	1580	5860	29	4	7	18	269	29	68	167	0.787962	0.619822	0.543761	0.620088	0.709621	0.852572	0.943633	0.990639	0.986255	1	1.11526	1.06347	0.668897	0.689333
GAS6	1189	5649	13	3	5	5	66	7	20	39	0.859697	0.262398	0.546196	0.513477	0.624042	0.582611	0.945783	0.95222	0.986255	0.990772	0.477245	0.954489	0.19259	0.480696
SORBS3	2319	4760	12	3	5	4	41	2	14	25	0.972332	0.237348	0.546594	0.399771	0.632127	0.310386	0.945783	0.913995	0.986255	0.879096	0.394895	0.761583	0.122818	0.251437
TULP4	1576	5862	26	3	8	14	167	17	47	103	0.673866	0.402016	0.548107	0.748843	0.835296	0.699621	0.945915	0.998859	1	1	0.874071	1.00425	0.452972	0.539914
TCF7L2	1450	6035	17	2	2	13	123	26	32	61	0.763628	0.980212	0.548264	0.632813	0.436775	0.789131	0.945915	0.992271	0.948231	1	2.97101	0.854167	0.973413	0.262135
CTNNB1	1650	5829	19	1	3	13	137	19	19	91	0.340525	0.558482	0.550034	0.268694	0.403307	0.452319	0.947351	0.892785	0.948231	0.948438	1.43835	1.6222	0.801013	0.98367
BMP1	2314	4769	27	3	7	17	88	12	27	49	0.641535	0.79243	0.550709	0.458648	0.416986	0.436099	0.947351	0.936971	0.948231	0.944616	1.07978	0.839828	0.642093	0.264458
MAML1	1007	5960	14	3	5	6	80	7	24	49	0.902521	0.309897	0.551491	0.530142	0.659053	0.7283	0.947351	0.955217	0.986255	1	0.719382	0.882575	0.368753	0.345707
SON	922	6331	32	1	7	23	205	9	62	131	0.734048	0.883219	0.553505	0.896144	0.901782	0.708266	0.949437	1	1	1	1.01885	0.675182	0.587434	0.00760571
FANCA	1626	5586	12	1	1	10	105	10	26	69	0.921764	0.967492	0.555066	0.601235	0.787275	0.565629	0.950498	0.977554	1	0.984813	3.94934	1.13923	0.974301	0.750069
SGSM2	2114	5408	23	1	7	15	79	4	29	43	0.753533	0.832401	0.555725	0.549037	0.402712	0.642142	0.950498	0.968361	0.948231	1	0.902873	0.653805	0.491079	0.0499605
AMPD3	1173	6287	10	0	3	7	73	9	17	47	0.311987	0.543465	0.558838	0.410228	0.300971	0.421577	0.952234	0.913995	0.909039	0.944173	0.950249	1.2457	0.588432	0.820664
EPB41L3	1210	5886	27	2	6	19	202	25	43	134	0.407226	0.598543	0.560063	0.428793	0.386408	0.350865	0.952234	0.925045	0.948231	0.889014	1.31228	1.31664	0.785865	0.955639
FYN	1541	5856	13	1	2	10	66	8	15	43	0.732308	0.853125	0.560778	0.489214	0.428762	0.245766	0.952234	0.944223	0.948231	0.871455	1.8144	1.18541	0.869614	0.76029
COL18A1	1066	6164	26	6	7	13	202	43	61	91	0.737312	0.75041	0.560959	0.697947	0.603708	0.657336	0.952234	0.996691	0.986255	1	0.88684	0.697841	0.478441	0.0183393
CHD6	198	5541	12	0	2	10	283	27	67	185	0.514474	0.867643	0.561146	0.404647	0.33222	0.605701	0.952234	0.913995	0.927191	1	1.6805	1.03338	0.844483	0.61508
CDON	1386	5950	12	0	3	9	32	4	7	21	0.32967	0.644739	0.561553	0.600394	0.355219	0.381483	0.952234	0.977554	0.936362	0.924123	1.03653	1.1846	0.630057	0.718066
ZNF142	709	6628	12	1	1	10	149	22	35	89	0.852133	0.971833	0.564353	0.501322	0.801163	0.662194	0.952802	0.94954	1	1	3.9528	1.00617	0.974878	0.545454
AFAP1L2	1449	6049	18	1	6	11	69	7	21	41	0.484214	0.563901	0.56465	0.430181	0.46819	0.710625	0.952802	0.925045	0.948231	1	0.884122	0.989374	0.490101	0.529386
COL6A3	854	6499	49	3	21	25	627	33	189	403	0.520968	0.0426618	0.565702	0.285115	0.320401	0.22852	0.952802	0.892785	0.927191	0.858603	0.527306	0.959967	0.0223703	0.334292
MIIP	1380	6046	12	0	4	8	47	2	16	28	0.662338	0.697544	0.566161	0.407007	0.492177	0.593126	0.952802	0.913995	0.948231	0.991147	0.829943	0.7262	0.486659	0.193339
L3MBTL2	1565	5801	11	0	2	8	73	5	22	46	0.679803	0.879552	0.566604	0.411997	0.432511	0.256946	0.952802	0.915084	0.948231	0.877635	1.60248	0.910498	0.827691	0.39991
SETX	1164	6096	28	1	4	21	261	26	53	180	0.481095	0.848498	0.566704	0.838269	0.735159	0.959516	0.952802	1	0.986255	1	1.62682	1.08827	0.876155	0.730133
AGRN	1370	6009	12	2	3	4	168	24	54	90	0.825465	0.532266	0.568038	0.595888	0.46206	0.579949	0.953693	0.977554	0.948231	0.989999	0.795418	0.83077	0.506362	0.158766
NIN	1128	6136	23	1	5	17	225	27	61	134	0.418921	0.859084	0.569174	0.223764	0.549733	0.390362	0.95422	0.873711	0.96102	0.930161	1.10708	0.827377	0.659384	0.120614
FCHSD1	1109	6030	10	2	1	7	45	2	13	30	0.995098	0.939368	0.570132	0.582877	0.712734	0.495592	0.95422	0.977554	0.986255	0.958965	3.61663	0.989165	0.965881	0.543026
UBA6	977	6491	10	1	1	8	120	15	28	77	0.878788	0.936479	0.571242	0.713472	0.390029	0.403211	0.95422	0.998286	0.948231	0.93552	2.47105	0.813877	0.911612	0.201706
ZNF721	1198	6164	13	1	3	9	129	7	34	87	0.860465	0.70281	0.571573	0.563699	0.604927	0.397934	0.95422	0.971535	0.986255	0.930161	0.956721	0.776632	0.580296	0.124995
HDAC10	1664	5683	14	0	3	11	33	2	11	20	0.65	0.90415	0.572894	0.285737	0.597762	0.135624	0.95422	0.892785	0.986255	0.756843	1.67992	0.874668	0.865029	0.423724
KIAA1462	988	6090	34	3	7	24	248	16	76	146	0.912898	0.936756	0.573175	0.679244	0.78729	0.48246	0.95422	0.996691	1	0.958965	1.45598	0.764887	0.862208	0.0343917
ODF2	1146	6097	13	1	4	8	117	14	29	74	0.497071	0.469172	0.575134	0.551883	0.457551	0.293385	0.955079	0.970496	0.948231	0.877635	0.773537	1.05361	0.441715	0.630636
PHF10	1575	5820	12	4	4	4	34	6	7	21	0.732198	0.177926	0.5753	0.525292	0.525237	0.433405	0.955079	0.955217	0.948231	0.944364	0.525402	0.943578	0.235634	0.518337
TBCK	1281	6343	11	1	1	9	94	9	23	62	0.919786	0.954306	0.578967	0.587711	0.713428	0.676298	0.958498	0.977554	0.986255	1	3.07468	0.855563	0.947609	0.29738
USP10	1648	5589	12	2	4	6	88	6	27	55	0.91233	0.45107	0.578975	0.596074	0.717797	0.588203	0.958498	0.977554	0.986255	0.991147	0.64188	0.787916	0.338324	0.182255
BTRC	1513	6025	14	4	4	6	82	18	17	47	0.623511	0.298864	0.581116	0.459886	0.495811	0.766533	0.959597	0.936971	0.948231	1	0.827796	1.01283	0.474262	0.564282
USP24	1038	6325	12	2	1	9	181	24	45	110	0.956405	0.96591	0.582802	0.339853	0.555162	0.764251	0.959597	0.905784	0.962011	1	3.07566	0.979654	0.947117	0.481675
KIF15	1725	5787	17	1	2	14	76	8	14	54	0.713043	0.865858	0.582922	0.486068	0.588762	0.306977	0.959597	0.942235	0.980169	0.877635	2.21357	1.24381	0.925866	0.807576
RIN3	1291	6009	21	0	5	11	125	7	44	58	0.499208	0.880136	0.583748	0.350912	0.611065	0.398838	0.959597	0.905784	0.986255	0.930161	1.01606	0.629789	0.604635	0.0138109
RPS6KA2	1587	5831	19	0	5	14	112	5	38	69	0.562165	0.851679	0.583906	0.473693	0.570601	0.51304	0.959597	0.936971	0.973137	0.958965	1.27525	0.874934	0.757252	0.282836
DHX29	1213	6017	11	3	3	5	105	19	18	67	0.645076	0.256545	0.584489	0.70644	0.870677	0.772474	0.959597	0.996691	1	1	0.759895	1.18734	0.454563	0.779499
TMX3	1901	5538	15	1	3	11	47	8	9	29	0.413534	0.696807	0.58606	0.590213	0.513437	0.732295	0.960847	0.977554	0.948231	1	1.01433	1.0758	0.612476	0.635838
LONP1	1105	6231	13	1	3	8	97	5	25	66	0.86534	0.62912	0.589014	0.568588	0.484265	0.472108	0.961539	0.971535	0.948231	0.958965	1.27401	1.29949	0.743703	0.892903
ABR	2096	5389	29	4	10	15	100	11	32	56	0.72166	0.456756	0.591721	0.620024	0.546892	0.750578	0.961539	0.990639	0.958879	1	0.707567	0.854977	0.25733	0.271718
ADAM12	1396	6036	22	1	5	16	100	6	33	61	0.770317	0.897114	0.59185	0.663982	0.659037	0.352759	0.961539	0.996691	0.986255	0.889014	1.35099	0.806742	0.793268	0.183007
WNK1	504	6041	13	2	3	8	274	23	74	176	0.90687	0.679218	0.591927	0.673684	0.818359	0.81075	0.961539	0.996691	1	1	0.991904	0.844459	0.604601	0.123213
MED16	1303	6055	17	2	5	10	82	6	25	51	0.853879	0.596368	0.591976	0.598667	0.764309	0.830726	0.961539	0.977554	1	1	0.998555	1.09841	0.594903	0.690602
PRKCH	1287	6050	13	1	2	10	73	12	17	44	0.643548	0.882422	0.592434	0.702208	0.553133	0.460203	0.961539	0.996691	0.961466	0.952879	1.97171	1.18303	0.893859	0.766086
SIPA1L1	1383	6008	33	3	10	20	274	30	70	170	0.438067	0.389836	0.592467	0.740316	0.744739	0.543881	0.961539	0.998859	0.99215	0.97569	0.707305	0.939705	0.23958	0.351225
ACO1	1531	5722	14	2	3	9	80	9	19	52	0.806869	0.67196	0.59436	0.568629	0.65781	0.695653	0.961539	0.971535	0.986255	1	1.22483	1.10235	0.721025	0.684976
SLK	1514	6015	15	2	1	12	119	20	14	80	0.801802	0.876738	0.595348	0.727026	0.678825	0.320242	0.961539	0.998859	0.986255	0.887816	3.74291	1.91259	0.971055	0.994668
MAGI3	1165	6211	13	4	4	5	107	16	29	60	0.878442	0.353879	0.595492	0.593628	0.624226	0.339074	0.961539	0.977554	0.986255	0.887816	0.590176	0.790778	0.292753	0.171984
MUC5B	1276	6196	27	2	7	18	311	29	93	184	0.639338	0.782244	0.596289	0.193372	0.355638	0.686482	0.961539	0.843849	0.936362	1	1.27207	1.00003	0.770991	0.522516
RFX7	1140	6386	19	3	4	12	133	16	38	78	0.872331	0.817246	0.596439	0.695793	0.668736	0.562601	0.961539	0.996691	0.986255	0.984813	0.977769	0.672958	0.577689	0.0292837
TET2	1295	6334	14	2	2	10	196	47	35	112	0.579213	0.817774	0.597013	0.666163	0.453312	0.746293	0.961539	0.996691	0.948231	1	1.46677	1.14827	0.793676	0.792795
ARHGEF10L	1413	6074	12	2	3	7	140	10	31	99	0.897106	0.454918	0.597908	0.341523	0.364261	0.361693	0.961675	0.905784	0.936362	0.900063	1.23032	1.53293	0.726074	0.987688
RGS12	1194	6204	24	3	2	19	182	26	47	107	0.939247	0.993546	0.599326	0.6036	0.630856	0.523939	0.962652	0.977554	0.986255	0.96123	4.22884	0.976875	0.995727	0.476001
COL4A1	1158	5674	33	1	9	23	247	14	67	166	0.481029	0.602747	0.602728	0.393705	0.400056	0.395217	0.966286	0.913995	0.948231	0.930161	0.853006	0.856881	0.407802	0.158887
PIBF1	1425	5556	13	3	1	8	59	8	9	42	0.944862	0.830521	0.60394	0.850697	0.92824	0.478145	0.966286	1	1	0.958965	2.43285	1.35159	0.908614	0.840213
CDH5	1474	5749	16	1	3	12	111	6	35	69	0.891755	0.917539	0.604031	0.693333	0.639328	0.623702	0.966286	0.996691	0.986255	1	2.01481	0.956482	0.923593	0.450454
PITPNM2	578	6487	10	0	4	6	136	5	47	82	0.680389	0.53479	0.606164	0.443865	0.525641	0.44523	0.966432	0.932508	0.948231	0.948438	0.67631	0.815409	0.379299	0.151501
SH2D3C	1125	6100	10	1	3	6	67	7	22	38	0.758798	0.706453	0.607848	0.781432	0.67828	0.527897	0.966432	1	0.986255	0.96264	0.859557	0.840022	0.538746	0.293525
VAV2	1166	6081	20	1	5	14	81	1	20	59	0.957265	0.568727	0.608715	0.779752	0.837896	0.866613	0.966432	1	1	1	1.30979	1.28796	0.773966	0.865897
ATP2A3	2124	5393	28	2	10	16	116	8	50	58	0.772551	0.826371	0.608798	0.87461	0.779138	0.877872	0.966432	1	1	1	0.877774	0.614442	0.439543	0.00716288
SP100	800	6585	13	1	3	9	137	15	23	99	0.505226	0.422226	0.610403	0.657665	0.604412	0.340827	0.966432	0.996691	0.986255	0.887816	0.880386	1.378	0.534642	0.937582
HEATR5A	1079	6134	18	2	1	15	127	14	23	88	0.94332	0.972506	0.610932	0.592686	0.53648	0.543656	0.966432	0.977554	0.953206	0.97569	4.71484	1.32562	0.987388	0.910365
RNF111	1115	6404	15	2	0	13	118	32	20	65	1	1	0.61187	0.399084	0.367705	0.943509	0.966432	0.913995	0.940658	1	Inf	1.15746	1	0.756703
RBM26	1384	5606	14	1	3	10	86	13	19	54	0.490196	0.704538	0.612252	0.228693	0.253916	0.323714	0.966432	0.875672	0.866972	0.887816	1.00507	0.865614	0.607035	0.332492
ANK3	1176	6230	36	3	5	27	462	60	101	298	0.659054	0.930867	0.615651	0.687797	0.573946	0.512608	0.966432	0.996691	0.976037	0.958965	1.95347	1.06377	0.953371	0.722934
TCF20	1602	5770	31	7	9	15	233	35	50	138	0.682633	0.187506	0.618415	0.597242	0.613282	0.410813	0.966432	0.977554	0.986255	0.93552	0.594414	0.976326	0.151067	0.46914
NPHP4	1448	5947	14	1	5	8	145	5	47	93	0.888251	0.469015	0.619021	0.650705	0.444634	0.716012	0.966432	0.996691	0.948231	1	0.78772	0.893867	0.430233	0.2919
FBLN1	1656	5712	13	2	1	10	116	8	24	84	0.981665	0.934513	0.61952	0.746909	0.481991	0.889799	0.966432	0.998859	0.948231	1	4.68849	1.59835	0.985883	0.986955
BPTF	477	6057	14	0	1	13	272	29	55	179	0.658824	0.975147	0.619829	0.628196	0.495882	0.413135	0.966432	0.992265	0.948231	0.93552	4.19083	1.13709	0.979999	0.819469
FNBP4	814	6584	17	0	5	12	128	12	24	69	0.158467	0.482214	0.619938	0.505947	0.0670882	0.304106	0.966432	0.949974	0.718126	0.877635	0.677037	0.893313	0.312888	0.351715
FOXRED2	1511	5835	11	1	1	9	53	1	11	41	0.989011	0.904461	0.620634	0.605775	0.861958	0.330098	0.966432	0.977554	1	0.887816	4.02796	1.70883	0.975245	0.964106
ITGAX	452	6330	10	1	3	6	181	13	64	104	0.863807	0.731897	0.620882	0.659166	0.67604	0.65543	0.966432	0.996691	0.986255	1	1.03911	0.786288	0.638578	0.0737216
SEC16A	1147	6055	23	1	5	17	208	19	65	122	0.59937	0.918455	0.621102	0.662433	0.618376	0.549481	0.966432	0.996691	0.986255	0.97933	1.33819	0.772033	0.787902	0.052546
CELSR3	1787	5717	14	2	3	9	152	15	30	106	0.790553	0.526889	0.622055	0.449558	0.58379	0.583725	0.966432	0.936971	0.978031	0.991147	1.42686	1.62663	0.796974	0.994816
ITPR2	401	6176	18	2	4	12	292	42	58	192	0.512291	0.535847	0.622449	0.405767	0.354995	0.191883	0.966432	0.913995	0.936362	0.815549	1.09554	1.22049	0.654383	0.923446
ARAP2	1192	6305	30	4	7	18	244	34	59	151	0.63239	0.586423	0.623181	0.674759	0.593229	0.636722	0.966432	0.996691	0.984844	1	0.893754	0.862769	0.469086	0.181746
USP19	1787	5727	23	3	7	13	134	3	32	97	0.983551	0.239598	0.623687	0.41623	0.426526	0.673403	0.966432	0.916633	0.948231	1	0.703028	1.15932	0.29736	0.793934
ERBB2IP	1412	5927	20	3	3	14	115	13	26	75	0.892745	0.847051	0.623958	0.890044	0.938626	0.698346	0.966432	1	1	1	1.27594	0.775381	0.739887	0.156854
VLDLR	1801	5349	11	1	3	7	44	2	9	32	0.846154	0.433444	0.624497	0.556142	0.221619	0.308318	0.966432	0.971535	0.820658	0.877635	0.749649	1.17802	0.45377	0.724244
TYK2	754	6411	13	3	3	6	146	12	53	80	0.984113	0.765608	0.625163	0.701274	0.884428	0.801462	0.966432	0.996691	1	1	1.01582	0.681775	0.62599	0.0195334
PLEKHA7	1045	6394	17	4	4	9	104	14	27	63	0.893175	0.592414	0.62592	0.663871	0.686529	0.69576	0.966432	0.996691	0.986255	1	1.25481	1.00099	0.739729	0.540184
EIF3A	1444	6054	15	0	1	14	159	13	31	113	0.711111	0.971261	0.626012	0.822075	0.598914	0.832491	0.966432	1	0.986255	1	3.62893	1.03684	0.968484	0.603036
DSEL	1901	5543	12	2	2	8	30	6	6	18	0.715385	0.768866	0.626426	0.605029	0.698026	0.656393	0.966432	0.977554	0.986255	1	1.15719	1.06076	0.693275	0.623868
BTAF1	1524	6025	22	1	3	17	174	21	36	116	0.542888	0.879931	0.626919	0.821423	0.941969	0.93192	0.966432	1	1	1	1.82126	1.07083	0.897844	0.670668
MYO9B	579	6523	19	2	6	11	189	13	54	120	0.806614	0.454039	0.629707	0.438613	0.437095	0.27405	0.967288	0.931098	0.948231	0.877635	0.911636	1.07202	0.514439	0.691682
ZC3H7B	1563	5797	18	2	3	13	101	6	36	59	0.971132	0.966824	0.630174	0.743342	0.496958	0.50909	0.967288	0.998859	0.948231	0.958965	1.82103	0.735418	0.894474	0.0876327
PCDH7	1219	6287	14	0	1	13	140	8	33	99	0.809524	0.980066	0.63084	0.395508	0.453142	0.662986	0.967288	0.913995	0.948231	1	5.84061	1.40229	0.994455	0.965739
ATXN7	1652	5815	12	2	3	7	100	15	30	52	0.790553	0.771405	0.630987	0.623646	0.604743	0.3048	0.967288	0.991659	0.986255	0.877635	0.964984	0.651364	0.59238	0.041
TOP2B	1539	5866	15	2	3	10	108	15	20	70	0.64595	0.593455	0.632577	0.892624	0.904601	0.828714	0.967288	1	1	1	0.924836	1.06819	0.560166	0.642681
PLCE1	1522	6034	22	3	5	14	183	20	49	113	0.819732	0.725459	0.633876	0.667374	0.620788	0.518726	0.967288	0.996691	0.986255	0.960846	1.14881	0.937802	0.686768	0.378608
ATF7IP	609	6106	10	3	1	6	161	36	26	98	0.885877	0.809649	0.634235	0.681342	0.515502	0.778078	0.967288	0.996691	0.948231	1	2.33552	1.31373	0.900271	0.916292
OBSCN	257	5517	20	0	4	16	724	48	238	437	0.482916	0.956342	0.634941	0.497817	0.52653	0.828487	0.967288	0.94954	0.948376	1	1.78612	0.8743	0.9072	0.0507551
SGK223	2196	4844	27	3	7	15	145	17	49	71	0.755774	0.849294	0.634972	0.37058	0.561227	0.210596	0.967288	0.910923	0.966508	0.833258	1.04468	0.702304	0.614603	0.0332284
MICAL1	1545	5842	16	0	4	12	103	11	28	60	0.291386	0.79614	0.636116	0.692536	0.43829	0.72553	0.967288	0.996691	0.948231	1	1.2532	0.969739	0.739308	0.484914
PCSK7	1421	5944	11	1	4	6	84	4	25	55	0.853566	0.408664	0.636782	0.502368	0.381734	0.352022	0.967288	0.94954	0.948231	0.889014	0.657668	0.982118	0.363254	0.511904
HERC1	1022	6454	26	4	2	20	414	56	83	273	0.955757	0.9759	0.637646	0.845427	0.77356	0.756591	0.967288	1	1	1	3.35831	1.13292	0.986086	0.857942
IMPDH2	1792	5724	11	0	2	8	55	2	19	34	0.83004	0.915221	0.63852	0.65838	0.459486	0.426658	0.967288	0.996691	0.948231	0.944364	1.59234	0.733315	0.825431	0.172349
FLCN	2119	5379	11	4	3	4	69	17	16	36	0.751819	0.401751	0.63929	0.612678	0.522145	0.554403	0.967288	0.982768	0.948231	0.981113	1.04099	1.14323	0.639578	0.72081
HSP90AA1	1270	6003	14	1	2	10	96	13	16	64	0.596371	0.732157	0.639698	0.842957	0.987808	0.816595	0.967288	1	1	1	1.85756	1.51983	0.877309	0.954565
DAB2IP	1139	6123	23	3	6	14	119	10	46	61	0.92971	0.910473	0.640898	0.59655	0.668128	0.709706	0.96787	0.977554	0.986255	1	1.22791	0.650658	0.739145	0.0174995
DYRK1A	1002	6245	11	2	2	7	97	12	12	73	0.702222	0.400452	0.64225	0.706411	0.646246	0.405877	0.968679	0.996691	0.986255	0.93552	1.34337	1.96531	0.757972	0.993456
TRAPPC10	1062	6170	15	2	3	10	129	11	42	76	0.930905	0.889914	0.646813	0.735237	0.848542	0.826783	0.971624	0.998859	1	1	1.60449	0.744943	0.848134	0.076429
FOXP1	1613	5796	21	4	5	12	108	19	30	58	0.757119	0.739245	0.646818	0.504137	0.641197	0.608594	0.971624	0.949974	0.986255	1	0.870642	0.814831	0.484746	0.201
PFAS	2248	5308	19	1	3	15	111	9	27	75	0.744119	0.884791	0.646837	0.738877	0.694069	0.752079	0.971624	0.998859	0.986255	1	2.086	1.18979	0.933923	0.811184
NT5E	1428	5961	11	0	3	8	54	2	20	31	0.77	0.86245	0.651415	0.496526	0.678921	0.651311	0.971624	0.94954	0.986255	1	1.0464	0.647458	0.638583	0.0843193
SCAP	1773	5744	30	4	8	18	107	11	36	60	0.858562	0.805179	0.651915	0.56851	0.457814	0.541359	0.971624	0.971535	0.948231	0.97569	1.14686	0.802803	0.695455	0.171896
FAM120B	1573	5821	12	3	4	5	107	7	25	73	0.943055	0.198573	0.652091	0.673425	0.682642	0.598016	0.971624	0.996691	0.986255	0.994181	0.595055	1.0745	0.29707	0.659183
RAPGEF1	1161	6088	16	2	4	9	110	4	34	72	0.974573	0.648746	0.653268	0.702665	0.616718	0.717485	0.971624	0.996691	0.986255	1	0.946572	0.928012	0.567243	0.393704
MANEA	1500	5911	10	0	1	9	66	4	11	51	0.75	0.859395	0.653302	0.70569	0.478506	0.801137	0.971624	0.996691	0.948231	1	2.61473	1.39981	0.921957	0.881491
AP4E1	1171	6342	11	1	3	7	113	13	19	80	0.490196	0.324883	0.654267	0.620997	0.554844	0.268553	0.971624	0.990757	0.962011	0.877635	0.834058	1.51447	0.507882	0.965667
NFRKB	1359	5966	16	1	5	10	96	8	29	59	0.631385	0.596266	0.654305	0.525263	0.720958	0.748419	0.971624	0.955217	0.986255	1	0.810054	0.851954	0.444048	0.272578
WFS1	1203	6209	15	0	5	10	110	2	46	61	0.818578	0.838593	0.654388	0.531659	0.446282	0.522416	0.971624	0.955217	0.948231	0.961007	1.05962	0.702577	0.636829	0.0446956
ADD1	1199	6195	12	3	3	6	90	8	29	48	0.970651	0.725013	0.654473	0.747104	0.867978	0.841733	0.971624	0.998859	1	1	0.980037	0.65899	0.601286	0.0487043
COG4	1483	5727	12	0	3	9	74	5	23	45	0.57842	0.823903	0.654843	0.218563	0.525529	0.257405	0.971624	0.863667	0.948231	0.877635	1.25608	0.891999	0.735326	0.36741
CLU	2229	4816	10	1	3	6	48	2	19	27	0.943478	0.790692	0.65795	0.78629	0.726903	0.705878	0.974817	1	0.986255	1	0.839582	0.618639	0.525573	0.073348
ACTA2	1528	5953	13	1	2	10	42	3	8	31	0.824176	0.751229	0.658663	0.206014	0.243324	0.622223	0.974817	0.863091	0.857049	1	2.03057	1.72598	0.90168	0.947766
ARIH2	1793	5724	11	1	2	7	56	8	17	30	0.765568	0.886753	0.659815	0.729589	0.713078	0.672345	0.974817	0.998859	0.986255	1	1.06663	0.627428	0.658459	0.080284
USP4	1787	5728	13	2	3	8	89	4	28	56	0.977584	0.766332	0.660969	0.753685	0.741635	0.695074	0.974817	0.998859	0.990237	1	1.04127	0.743764	0.632677	0.120975
CEP192	1167	5942	20	0	3	17	219	24	46	147	0.296225	0.883821	0.661102	0.827789	0.695133	0.678213	0.974817	1	0.986255	1	1.75631	1.105	0.885003	0.749195
NLRX1	1390	5955	19	1	3	15	114	12	30	71	0.685406	0.928874	0.663167	0.831098	0.813082	0.837456	0.976649	1	1	1	2.33986	1.18553	0.95716	0.813767
RBM5	1799	5717	13	3	2	8	67	12	10	44	0.759903	0.604095	0.665723	0.590925	0.272672	0.398483	0.978728	0.977554	0.897219	0.930161	1.40487	1.59218	0.776729	0.939399
NUP160	807	6591	10	0	0	10	123	15	36	72	1	1	0.666883	0.733926	0.721248	0.701183	0.978728	0.998859	0.986255	1	Inf	0.741592	1	0.0843384
USP28	1436	5936	22	7	3	12	142	31	23	87	0.863972	0.645457	0.667402	0.751997	0.726565	0.861985	0.978728	0.998859	0.986255	1	1.7804	1.50264	0.889723	0.974089
UTRN	1481	5930	55	6	15	34	352	32	80	238	0.612869	0.258415	0.668521	0.507975	0.351759	0.196784	0.978728	0.949974	0.936362	0.815549	0.891674	1.10345	0.402185	0.796888
DSG2	1494	5850	10	1	2	7	87	7	30	50	0.903644	0.902657	0.669013	0.59652	0.533714	0.606646	0.978728	0.977554	0.949802	1	1.19059	0.623645	0.708761	0.0270224
SRRM2	666	6139	23	1	5	17	383	27	87	260	0.57218	0.680627	0.669526	0.471728	0.723798	0.521051	0.978728	0.936971	0.986255	0.960846	1.03727	0.971344	0.610502	0.426532
XPO7	2311	4779	27	1	8	18	60	7	19	34	0.317919	0.756128	0.67258	0.631973	0.395262	0.145704	0.981983	0.992265	0.948231	0.771071	0.929803	0.844807	0.503719	0.31533
BMS1	1006	6297	20	1	3	15	143	17	30	94	0.556735	0.842814	0.675582	0.57994	0.521146	0.761665	0.983769	0.977554	0.948231	1	1.83322	1.21451	0.898818	0.851107
NOTCH3	572	6491	18	5	6	7	261	26	59	174	0.906434	0.0948628	0.676213	0.825492	0.60196	0.664134	0.983769	1	0.986255	1	0.554669	1.30441	0.204063	0.969905
MYO9A	954	6453	16	1	1	14	137	18	30	88	0.860408	0.985633	0.676616	0.846819	0.764626	0.860345	0.983769	1	1	1	4.09578	0.975186	0.978706	0.486004
FBXW7	1351	6225	37	11	3	23	196	76	20	96	0.598189	0.84362	0.677606	0.471496	0.77834	0.648425	0.983769	0.936971	1	1	3.11627	2.21255	0.991898	0.999913
FRYL	840	6605	18	3	5	10	274	25	54	193	0.773567	0.229795	0.677947	0.481493	0.511631	0.682572	0.983769	0.939276	0.948231	1	0.743036	1.21546	0.374217	0.914012
SMCR8	2027	5445	15	2	3	9	80	4	23	53	0.965756	0.754987	0.681666	0.894365	0.882351	0.916744	0.985848	1	1	1	1.17142	0.933739	0.698496	0.433264
NOTCH2	894	6227	18	7	3	8	296	78	56	160	0.85698	0.57916	0.681772	0.497799	0.533163	0.576807	0.985848	0.94954	0.949802	0.989999	1.07654	1.14062	0.65167	0.824333
TIAM1	1020	6279	35	2	9	24	214	13	64	136	0.720864	0.76909	0.681948	0.807908	0.579127	0.475908	0.985848	1	0.976789	0.958965	1.12785	0.908925	0.683355	0.284221
MTUS1	2253	4812	26	3	4	18	96	14	22	59	0.734971	0.874141	0.683236	0.547963	0.428063	0.637033	0.985848	0.967905	0.948231	1	1.60163	0.960976	0.868557	0.476577
CD248	513	6571	18	1	3	14	92	6	27	59	0.845257	0.929651	0.683532	0.804416	0.671901	0.5	0.985848	1	0.986255	0.958965	2.18602	1.00395	0.944311	0.546686
THRAP3	1011	6325	14	2	3	9	135	34	27	74	0.412545	0.668297	0.6845	0.625261	0.310797	0.590362	0.986045	0.991659	0.924602	0.991147	1.12615	1.08065	0.673386	0.672648
ARHGAP29	1225	6202	15	2	3	10	161	20	30	110	0.689301	0.561986	0.686838	0.46365	0.58583	0.374689	0.986197	0.936971	0.978031	0.920819	1.10876	1.21964	0.664489	0.858737
LCP1	1690	5395	13	0	2	11	76	7	18	49	0.541311	0.894795	0.686891	0.629902	0.820221	0.767001	0.986197	0.992265	1	1	2.00089	1.07119	0.898526	0.643505
STAB1	1812	5695	46	5	9	32	285	32	84	168	0.830149	0.952298	0.687642	0.56018	0.796613	0.748886	0.986197	0.971535	1	1	1.56891	0.88004	0.920111	0.184094
ZNF236	1906	5513	45	4	6	35	165	28	40	96	0.612777	0.985336	0.687928	0.882695	0.918308	0.491509	0.986197	1	1	0.958965	2.4853	1.1282	0.993251	0.770595
PDGFC	1369	6196	11	2	3	6	39	3	10	26	0.901261	0.517782	0.690305	0.542488	0.818686	0.406786	0.987163	0.960827	1	0.93552	0.751907	0.837839	0.455447	0.377456
FRMD6	1141	6141	11	3	2	6	96	10	19	67	0.941414	0.57186	0.691412	0.650543	0.678451	0.656332	0.987163	0.996691	0.986255	1	1.59935	1.38424	0.826917	0.92048
SMARCA2	1791	5363	35	0	5	30	180	8	39	123	0.417863	0.93669	0.691812	0.883086	0.980957	0.8423	0.987163	1	1	1	2.20956	1.19921	0.976265	0.86078
TBC1D9B	1004	5960	24	1	8	15	124	9	42	71	0.532649	0.670392	0.691929	0.56224	0.729683	0.788335	0.987163	0.971535	0.986255	1	0.840066	0.778728	0.420479	0.117195
ZCCHC6	1198	6163	13	2	2	9	120	13	23	82	0.860597	0.735393	0.693535	0.627619	0.735841	0.757378	0.988103	0.992265	0.986255	1	1.58441	1.1022	0.823395	0.696354
MAN2B2	1198	6211	19	0	4	15	110	5	39	65	0.634238	0.954537	0.694252	0.736352	0.945463	0.845816	0.988103	0.998859	1	1	1.75204	0.790666	0.899751	0.144659
FLII	2028	5443	17	1	4	12	101	4	32	64	0.896075	0.82803	0.701121	0.691085	0.442267	0.548718	0.994948	0.996691	0.948231	0.97933	1.36362	0.923287	0.786625	0.39253
MADD	816	6552	10	1	1	8	195	10	54	130	0.974359	0.95477	0.703011	0.857173	0.411094	0.509254	0.994948	1	0.948231	0.958965	3.05279	0.968131	0.945479	0.447296
SEC24C	1214	6166	16	4	4	8	103	23	22	58	0.626084	0.455239	0.703233	0.607618	0.474876	0.461588	0.994948	0.977554	0.948231	0.952879	0.908147	1.17417	0.539978	0.777049
DPYSL2	2276	4791	15	3	3	9	48	4	12	32	0.94643	0.690166	0.704217	0.698961	0.490272	0.755603	0.994948	0.996691	0.948231	1	1.26772	1.16207	0.740044	0.723791
COL27A1	1136	6124	11	0	3	8	89	4	21	63	0.617827	0.562046	0.704396	0.913831	0.974824	0.960778	0.994948	1	1	1	1.04097	1.18968	0.635649	0.789855
LRIG1	1615	5841	24	3	9	12	108	9	37	62	0.796615	0.407549	0.705143	0.709863	0.688499	0.697627	0.994948	0.998286	0.986255	1	0.582816	0.779713	0.157846	0.134578
SLC39A6	1584	5787	12	1	3	8	78	9	21	47	0.66556	0.71489	0.707343	0.724414	0.425359	0.617446	0.994948	0.998859	0.948231	1	0.819906	0.790624	0.498001	0.215084
TLN2	1043	6448	20	1	7	12	293	13	103	177	0.776829	0.587649	0.708818	0.642012	0.70917	0.736892	0.994948	0.996646	0.986255	1	0.769717	0.756496	0.365386	0.0143269
SYK	1199	6135	15	1	4	10	80	8	27	44	0.688587	0.834882	0.709121	0.565232	0.64755	0.731624	0.994948	0.971535	0.986255	1	1.10173	0.756747	0.660839	0.147218
SEL1L3	1221	6260	12	1	2	8	123	16	28	79	0.706445	0.782633	0.710399	0.63131	0.496744	0.622802	0.994948	0.992265	0.948231	1	1.40751	1.11847	0.778361	0.7296
LRBA	1310	6270	37	2	6	29	285	36	67	182	0.441715	0.930617	0.710457	0.717129	0.551291	0.492619	0.994948	0.998286	0.961466	0.958965	1.51018	0.960671	0.872209	0.410611
NOLC1	1509	6020	19	1	3	15	78	12	18	43	0.501876	0.9223	0.71275	0.565752	0.69728	0.625425	0.994948	0.971535	0.986255	1	1.83113	0.89649	0.898452	0.392167
LTBP2	1364	5998	28	1	6	21	217	18	62	137	0.521799	0.881855	0.714026	0.483961	0.836431	0.691112	0.994948	0.941741	1	1	1.45043	0.955815	0.846503	0.408873
CDKN1A	548	6300	14	9	0	5	52	27	4	21	1	1	0.714156	0.667157	0.693461	0.641439	0.994948	0.996691	0.986255	1	Inf	2.31388	1	0.973068
TUBGCP6	1664	5683	17	2	3	11	184	14	56	112	0.93801	0.890783	0.715804	0.873039	0.618763	0.912002	0.994948	1	0.986255	1	1.60068	0.943256	0.846585	0.38611
VPS39	1326	6226	10	1	2	7	81	3	26	50	0.965323	0.865777	0.717506	0.834069	0.829038	0.743713	0.994948	1	1	1	1.34685	0.76963	0.761695	0.166407
AGGF1	1431	5910	14	2	3	9	84	9	14	60	0.70989	0.437129	0.717542	0.506173	0.497945	0.382899	0.994948	0.949974	0.948231	0.925663	0.908536	1.26546	0.54959	0.825199
UBA7	1802	5714	16	1	3	11	67	2	18	46	0.938735	0.797174	0.71786	0.419164	0.570582	0.33781	0.994948	0.917985	0.973137	0.887816	1.51469	1.10159	0.823747	0.680995
PTPN21	1299	6012	19	2	4	13	113	11	32	70	0.818323	0.82447	0.718662	0.575792	0.724517	0.812027	0.994948	0.975717	0.986255	1	1.51337	0.958469	0.840236	0.456249
SMC5	1221	6119	11	2	2	7	101	10	19	70	0.875	0.616687	0.718739	0.789307	0.737799	0.514015	0.994948	1	0.987336	0.958965	1.29593	1.16709	0.742431	0.762769
EIF4G3	1432	6079	18	5	4	9	190	34	39	116	0.80546	0.436406	0.718884	0.69763	0.716693	0.566828	0.994948	0.996691	0.986255	0.984813	0.984651	1.12772	0.584545	0.771092
INADL	1051	6299	15	2	2	11	181	28	42	108	0.820928	0.912034	0.720356	0.92527	0.910102	0.912039	0.994948	1	1	1	2.25672	1.00023	0.928957	0.530442
ADAMTS1	1037	6262	13	1	3	9	116	5	33	77	0.909006	0.748512	0.72058	0.799236	0.824757	0.834718	0.994948	1	1	1	1.1596	0.913625	0.692993	0.3658
CD163	522	6109	13	2	4	7	279	15	63	200	0.905864	0.268895	0.720614	0.473795	0.343363	0.324425	0.994948	0.936971	0.932658	0.887816	0.613952	1.03787	0.304959	0.625076
ASPM	210	5571	11	0	1	10	351	40	66	244	0.626168	0.927308	0.721003	0.728722	0.941976	0.864328	0.994948	0.998859	1	1	3.02419	1.24633	0.945331	0.954977
C2CD2	1064	6199	13	1	6	6	73	0	30	43	1	0.392432	0.721293	0.649263	0.576966	0.502499	0.994948	0.996691	0.976789	0.958965	0.450011	0.645016	0.134942	0.0440518
LAMA2	1456	5941	42	5	10	27	283	30	66	184	0.684493	0.537964	0.721722	0.551083	0.499286	0.325167	0.994948	0.970496	0.948231	0.887816	1.04281	1.02956	0.605172	0.604471
ATP10D	988	6468	22	2	2	18	205	22	42	141	0.877598	0.958403	0.722532	0.776455	0.952954	0.80634	0.994948	1	1	1	3.29613	1.23089	0.984081	0.900303
IFT140	691	6119	11	0	3	8	146	5	54	86	0.773665	0.85786	0.72492	0.775834	0.814435	0.78565	0.995041	1	1	1	1.13566	0.709787	0.683846	0.0298965
WWC2	1492	6028	17	4	3	9	69	8	12	47	0.889855	0.489901	0.72515	0.672619	0.383727	0.63895	0.995041	0.996691	0.948231	1	1.23365	1.40187	0.723885	0.88795
MYOF	1529	6018	42	5	9	28	214	26	54	133	0.712286	0.774494	0.725394	0.538392	0.502763	0.512626	0.995041	0.956693	0.948231	0.958965	1.17143	0.982925	0.718616	0.483806
HERC4	1214	6232	10	3	2	5	88	10	20	57	0.947581	0.592827	0.726639	0.679948	0.573461	0.505597	0.995041	0.996691	0.976037	0.958965	1.11306	1.00175	0.678233	0.544987
COL15A1	1200	6102	32	2	10	20	219	18	62	139	0.489735	0.466983	0.727419	0.779668	0.6793	0.592059	0.995041	1	0.986255	0.991147	0.784667	0.897967	0.324492	0.260467
ACADVL	2253	5286	13	2	3	8	41	6	11	23	0.767145	0.749752	0.73017	0.667062	0.330358	0.791728	0.995041	0.996691	0.927191	1	1.13337	1.00458	0.682752	0.566785
NUP188	1158	6097	24	2	7	15	161	11	50	100	0.785747	0.642214	0.730408	0.591932	0.740626	0.799941	0.995041	0.977554	0.990004	1	0.930752	0.879561	0.515272	0.251515
ACACB	553	6543	21	2	5	13	280	16	97	164	0.932102	0.8544	0.731445	0.979402	0.962095	0.896546	0.995041	1	1	1	1.21833	0.771549	0.727866	0.0250546
GPSM1	1153	6058	10	2	2	6	38	6	15	17	0.919209	0.939432	0.733935	0.623844	0.650665	0.489175	0.995041	0.991659	0.986255	0.958965	1.41586	0.566342	0.783289	0.0745583
LIMD1	1734	5770	12	4	3	5	50	5	17	28	0.983562	0.650508	0.737397	0.800308	0.651871	0.59798	0.995041	1	0.986255	0.994181	0.896212	0.63262	0.555084	0.093332
SETBP1	1735	5684	45	6	11	28	204	15	56	133	0.935091	0.638632	0.737438	0.60442	0.718825	0.611132	0.995041	0.977554	0.986255	1	1.05495	0.929161	0.618322	0.346755
ROBO4	1391	5958	26	2	6	18	142	9	44	89	0.852205	0.846441	0.739788	0.797753	0.733168	0.845612	0.995041	1	0.986255	1	1.39542	0.875306	0.823883	0.260899
CDH3	1482	5719	10	0	3	7	71	4	29	38	0.694678	0.873781	0.739864	0.631231	0.647266	0.633127	0.995041	0.992265	0.986255	1	1.04392	0.632525	0.641133	0.0403787
VPS13C	1055	6442	29	3	4	22	369	64	52	250	0.40053	0.680404	0.740159	0.642566	0.463995	0.732872	0.995041	0.996646	0.948231	1	1.80457	1.67154	0.915768	0.999879
VIM	1007	6016	11	2	3	6	71	4	25	42	0.9713	0.718708	0.740184	0.939343	0.87405	0.780628	0.995041	1	1	1	1.14638	0.722217	0.688917	0.123875
BRD3	1162	6079	11	2	3	6	95	11	34	49	0.897007	0.785258	0.74151	0.828073	0.773305	0.754457	0.995041	1	1	1	1.03126	0.662951	0.634379	0.0421695
ANKFY1	2127	5388	16	3	4	8	91	6	26	59	0.963011	0.542653	0.741871	0.737175	0.779477	0.774269	0.995041	0.998859	1	1	1.03516	0.987381	0.622571	0.518542
FAM53C	1115	6018	12	3	2	7	43	9	6	27	0.693498	0.556617	0.742026	0.441679	0.696219	0.747885	0.995041	0.931214	0.986255	1	1.45662	1.76008	0.792017	0.935088
RNF213	538	6025	22	1	5	16	470	29	143	296	0.733374	0.860986	0.742246	0.848275	0.940466	0.903118	0.995041	1	1	1	1.44514	0.921418	0.831107	0.223277
COL5A2	415	6762	19	2	2	15	264	19	45	199	0.915894	0.847236	0.743268	0.66573	0.818126	0.856736	0.995041	0.996691	1	1	2.16472	1.25073	0.921188	0.927584
STC2	1041	5969	11	0	1	10	37	2	15	20	0.888889	0.995905	0.74491	0.454623	0.687065	0.705559	0.995041	0.936971	0.986255	1	4.21294	0.561726	0.979084	0.0666239
RALGAPA1	1071	6104	25	4	4	17	143	19	28	96	0.814955	0.732395	0.746531	0.559831	0.667184	0.731519	0.995041	0.971535	0.986255	1	1.45047	1.07749	0.821588	0.669774
NRP1	943	6117	11	2	3	6	129	8	36	85	0.948942	0.541442	0.747075	0.891912	0.772732	0.672601	0.995041	1	1	1	1.00897	0.977439	0.617939	0.487051
CBFB	1477	5736	25	8	1	16	19	5	1	13	0.857143	0.804301	0.747197	0.822021	0.957002	0.883334	0.995041	1	1	1	5.70417	4.75348	0.994648	0.987777
TGFBR3	1219	6214	14	3	3	8	115	9	28	78	0.958066	0.598834	0.747202	0.779823	0.886733	0.853462	0.995041	1	1	1	1.29079	1.17554	0.74837	0.800501
LONRF1	2223	4814	13	3	2	8	45	5	10	30	0.942208	0.763551	0.74939	0.690847	0.639287	0.667852	0.995041	0.996691	0.986255	1	1.99822	1.19893	0.898167	0.745391
ANKRD17	968	6437	21	1	3	17	253	18	59	174	0.767202	0.90972	0.749769	0.828515	0.791464	0.762165	0.995041	1	1	1	1.88875	0.981722	0.909293	0.475622
NISCH	1814	5690	22	2	8	12	130	4	48	77	0.952114	0.538514	0.7503	0.920098	0.821458	0.863952	0.995041	1	1	1	0.769	0.714072	0.348955	0.0422111
AIM1	1529	5816	32	2	6	24	164	23	41	98	0.42677	0.902314	0.750411	0.715201	0.595271	0.629324	0.995041	0.998286	0.986121	1	1.41775	0.937789	0.835843	0.392124
UBAP2	1387	5817	13	3	4	6	96	13	29	53	0.854344	0.513272	0.751919	0.64316	0.515308	0.924444	0.995041	0.996646	0.948231	1	0.789033	0.73764	0.44804	0.11016
PER1	2248	5306	38	3	10	24	100	6	32	62	0.845637	0.757804	0.752597	0.638343	0.860488	0.693707	0.995041	0.994374	1	1	1.05152	0.834135	0.615766	0.230057
SEC24B	1273	6339	17	2	2	13	118	10	32	75	0.951129	0.959327	0.753017	0.735386	0.810565	0.778171	0.995041	0.998859	1	1	2.14927	0.786788	0.918498	0.148772
MAST3	569	6544	10	0	2	7	134	11	45	78	0.653962	0.894619	0.753398	0.359891	0.432264	0.784213	0.995041	0.907964	0.948231	1	1.54638	0.795279	0.815196	0.128206
LCMT2	1300	6251	13	1	2	10	83	8	17	58	0.765568	0.794718	0.754493	0.776722	0.638663	0.790956	0.995041	1	0.986255	1	1.79005	1.30568	0.865375	0.866587
MAPKBP1	1336	6217	19	2	5	12	144	11	43	90	0.840575	0.690525	0.755252	0.677922	0.647033	0.829775	0.995041	0.996691	0.986255	1	0.991567	0.860304	0.582284	0.231469
ZNF395	2213	4832	11	1	3	5	58	6	16	25	0.712977	0.676107	0.75641	0.715615	0.74923	0.862126	0.995041	0.998286	0.992563	1	0.804675	0.628653	0.501825	0.100699
APP	1040	6244	12	3	2	7	106	5	27	72	0.995214	0.753953	0.756579	0.67814	0.898021	0.818257	0.995041	0.996691	1	1	1.61909	1.01276	0.831317	0.560002
FGD5	1495	5839	18	1	6	11	134	4	43	87	0.879837	0.526633	0.757251	0.889303	0.700208	0.579704	0.995041	1	0.986255	0.989999	0.775076	0.802113	0.38814	0.137767
DAPK1	1200	6150	26	2	5	19	178	24	63	89	0.703709	0.987128	0.7577	0.722953	0.404333	0.712969	0.995041	0.998859	0.948231	1	1.67351	0.685062	0.899759	0.0128144
FBXO31	1654	5573	11	2	3	6	58	3	18	37	0.966464	0.623241	0.758794	0.870106	0.549679	0.816842	0.995041	1	0.96102	1	0.915235	0.966082	0.573859	0.502121
MBD1	1852	5626	14	5	3	6	97	16	16	63	0.847968	0.29985	0.759185	0.678291	0.734988	0.622561	0.995041	0.996691	0.986255	1	0.848085	1.35164	0.517534	0.890435
DCLK1	1584	5515	10	2	3	5	44	3	14	27	0.94509	0.576521	0.759747	0.741435	0.843193	0.616167	0.995041	0.998859	1	1	0.750415	0.750415	0.46311	0.235836
HIPK1	1157	6205	12	0	1	11	125	11	35	79	0.765957	0.985932	0.760913	0.86511	0.59566	0.682307	0.995041	1	0.986121	1	4.13709	0.913383	0.978312	0.3586
SYNPO2	1281	6311	20	2	4	14	166	13	41	109	0.841244	0.766109	0.761133	0.543146	0.546657	0.753996	0.995041	0.960827	0.958879	1	1.17309	0.964632	0.697812	0.451392
KBTBD6	1677	5408	13	4	3	6	82	16	13	51	0.693548	0.3082	0.762528	0.719782	0.451131	0.78674	0.995041	0.998286	0.948231	1	0.840454	1.46849	0.518386	0.921262
MAST4	1423	5915	21	1	7	13	186	14	58	111	0.534376	0.566432	0.762813	0.705795	0.649925	0.765882	0.995041	0.996691	0.986255	1	0.683811	0.749109	0.277925	0.0445749
SYNPO	1077	6012	12	1	2	9	92	11	24	57	0.770507	0.877966	0.765322	0.528677	0.583357	0.725751	0.995041	0.955217	0.978031	1	2.19042	1.0587	0.920024	0.633401
RNF214	1423	5944	13	2	2	9	61	6	14	41	0.909091	0.812202	0.765724	0.730585	0.660852	0.86995	0.995041	0.998859	0.986255	1	1.87427	1.09535	0.880001	0.665187
KANK2	740	6421	14	0	4	10	90	7	35	48	0.504035	0.8972	0.766579	0.600443	0.294134	0.663123	0.995041	0.977554	0.900725	1	1.11902	0.66502	0.672378	0.0411902
MOXD1	1448	5946	13	0	4	9	51	2	20	29	0.710769	0.836389	0.768576	0.784574	0.748151	0.841653	0.995041	1	0.99224	1	0.841135	0.542065	0.489568	0.0271416
PHACTR2	1481	5932	10	1	1	8	72	16	15	41	0.742424	0.935731	0.768621	0.601663	0.681066	0.528762	0.995041	0.977554	0.986255	0.96264	2.73232	1.00185	0.928949	0.55219
TOPORS	1517	5731	16	1	1	14	110	11	19	80	0.866935	0.955404	0.769793	0.535171	0.779187	0.948473	0.995041	0.956693	1	1	4.08611	1.24734	0.978817	0.839707
ZEB2	480	6822	11	1	2	7	199	23	47	129	0.750016	0.740815	0.770989	0.827805	0.758886	0.490098	0.995041	1	0.998667	0.958965	1.26425	0.988538	0.733074	0.500257
XPO4	1477	5638	12	4	1	7	104	16	23	65	0.985724	0.909737	0.772708	0.518264	0.767428	0.918906	0.995041	0.955217	1	1	3.1092	1.06794	0.949106	0.646589
JMJD1C	1214	6203	28	6	4	16	242	35	40	165	0.870676	0.576418	0.775653	0.878195	0.7945	0.761168	0.995041	1	1	1	1.34184	1.3136	0.778814	0.953459
KDM3B	1111	6021	28	4	5	19	198	25	46	123	0.819802	0.817424	0.77677	0.877632	0.810126	0.942449	0.995041	1	1	1	1.42834	1.05573	0.826458	0.652019
HYDIN	1511	5714	17	0	4	12	13	1	5	7	0.6	0.910145	0.777445	0.768794	0.438093	0.473211	0.995041	1	0.948231	0.958965	1.19215	0.635811	0.709284	0.299549
ARID1A	1472	6073	68	43	6	18	559	317	55	168	0.748095	0.570847	0.779618	0.83562	0.83199	0.920509	0.995041	1	1	1	2.55859	2.09339	0.994818	1
RPTOR	539	6021	11	2	3	6	149	7	51	91	0.981913	0.686906	0.780389	0.848594	0.753125	0.706237	0.995041	1	0.995501	1	1.10443	0.872406	0.671846	0.241406
CCAR1	1216	6229	24	5	4	14	109	25	18	65	0.584745	0.589475	0.784979	0.470578	0.507362	0.347925	0.995041	0.936971	0.948231	0.889014	1.19956	1.15514	0.710327	0.746535
ZNF202	1382	5971	14	0	3	11	80	3	28	49	0.75117	0.922466	0.785103	0.693559	0.705814	0.737596	0.995041	0.996691	0.986255	1	1.26305	0.639725	0.736405	0.0395837
NT5DC2	1813	5694	12	1	4	7	47	2	19	26	0.915385	0.753739	0.789537	0.706659	0.821846	0.855418	0.995041	0.996691	1	1	0.766045	0.622052	0.44354	0.0774658
SNX9	1581	5859	12	1	3	8	57	3	15	39	0.864525	0.643483	0.790087	0.749656	0.776142	0.860435	0.995041	0.998859	1	1	0.979619	0.892542	0.597339	0.402613
LZTS1	2302	4784	12	0	3	9	27	2	8	9	0.576923	0.946521	0.790784	0.873161	0.746672	0.53314	0.995041	1	0.99224	0.969122	1.32319	0.496196	0.761456	0.11539
TRPM2	1061	6183	23	2	8	13	256	18	97	141	0.800177	0.676757	0.791201	0.671472	0.708072	0.872783	0.995041	0.996691	0.986255	1	0.841736	0.75372	0.425707	0.0182651
SIK1	1058	6192	14	1	3	10	77	7	32	38	0.848554	0.969609	0.791319	0.812382	0.757069	0.736398	0.995041	1	0.998383	1	1.56454	0.557369	0.836821	0.0110066
MPDZ	1843	5364	34	6	7	21	144	14	37	92	0.945997	0.72917	0.79266	0.856716	0.823683	0.745087	0.995041	1	1	1	1.05888	0.862282	0.622137	0.248559
ADAMTS9	1643	5829	12	1	1	10	151	17	32	102	0.88	0.948127	0.792864	0.721426	0.508916	0.565721	0.995041	0.998859	0.948231	0.984813	3.60465	1.13669	0.966671	0.76676
DENND1A	1124	6119	14	2	3	9	109	10	37	61	0.92605	0.884394	0.793965	0.882481	0.715596	0.846153	0.995041	1	0.986255	1	1.63414	0.782944	0.854662	0.139626
ANKHD1	1101	6030	39	4	8	27	179	20	39	120	0.624775	0.657506	0.795509	0.942027	0.888127	0.773151	0.995041	1	1	1	0.528619	0.458224	0.088711	4.91606e-05
DPP9	1178	6190	11	1	4	6	77	4	29	44	0.880452	0.62119	0.797233	0.716461	0.405224	0.161437	0.995041	0.998286	0.948231	0.780319	0.676487	0.684263	0.37945	0.0729719
PFKL	1060	6178	12	0	2	10	78	7	29	42	0.661451	0.978535	0.797303	0.897077	0.899177	0.735135	0.995041	1	1	1	2.36901	0.718873	0.936339	0.104987
ARID2	452	6548	23	13	3	7	304	109	48	143	0.903937	0.487744	0.79801	0.922786	0.912837	0.87591	0.995041	1	1	1	1.48832	1.30228	0.817085	0.960762
TBC1D5	1519	5855	12	2	2	8	87	6	18	62	0.94188	0.70329	0.798487	0.724043	0.770523	0.590749	0.995041	0.998859	1	0.991147	1.59729	1.17135	0.826414	0.761718
SLCO2B1	739	6282	13	2	3	8	90	8	28	53	0.916517	0.790195	0.798748	0.676771	0.875655	0.784966	0.995041	0.996691	1	1	1.69203	0.997089	0.866746	0.536204
SVIL	993	6090	24	2	4	18	275	41	75	156	0.644176	0.953686	0.799361	0.481903	0.697868	0.584882	0.995041	0.939276	0.986255	0.991147	2.0399	0.941076	0.947291	0.352842
XPNPEP1	1479	6034	13	1	2	10	64	5	18	41	0.876923	0.9132	0.799564	0.844294	0.867931	0.854003	0.995041	1	1	1	1.98088	1.01245	0.895119	0.564877
KIAA0586	1253	6095	12	2	0	10	114	12	24	78	1	1	0.799786	0.910743	0.945709	0.72739	0.995041	1	1	1	Inf	0.933697	1	0.421107
TRIOBP	1489	5834	44	4	6	31	327	41	89	186	0.818619	0.98929	0.800749	0.602818	0.474395	0.743808	0.995041	0.977554	0.948231	1	1.97297	0.872874	0.965509	0.156144
IQGAP1	836	6374	10	1	2	7	157	18	33	104	0.719642	0.682528	0.803175	0.593809	0.717982	0.376563	0.995041	0.977554	0.986255	0.921609	1.40388	1.18053	0.777315	0.824116
MUC6	1274	6196	10	3	0	3	99	30	13	40	1	1	0.804556	0.691153	0.681222	0.773675	0.995041	0.996691	0.986255	1	Inf	1.465	1	0.914909
DYNC1H1	1268	6009	50	2	13	35	445	35	146	260	0.434509	0.918252	0.805901	0.821321	0.855456	0.738348	0.995041	1	1	1	1.11688	0.752583	0.6851	0.00352718
IRS2	1154	5676	10	3	2	5	49	6	9	34	0.902477	0.486709	0.805915	0.843977	0.761381	0.528601	0.995041	1	1	0.96264	1.25949	2.01519	0.739718	0.984557
JAK2	1803	5352	25	8	2	15	99	20	21	56	0.98654	0.960111	0.806552	0.691048	0.768274	0.556267	0.995041	0.996691	1	0.981113	2.82107	0.926924	0.969564	0.420652
TOP3A	2028	5447	14	2	3	9	104	14	28	61	0.790612	0.780055	0.806694	0.787502	0.838632	0.666341	0.995041	1	1	1	1.23901	0.889436	0.727131	0.337253
LARP1	1086	6017	14	3	1	10	140	25	39	76	0.974858	0.987958	0.807514	0.819357	0.825506	0.84336	0.995041	1	1	1	3.77682	0.72191	0.971044	0.0597887
SPG11	1265	6271	20	3	1	16	211	20	57	134	0.994678	0.997054	0.80763	0.85758	0.89437	0.93161	0.995041	1	1	1	5.86996	0.841017	0.995312	0.151709
UNC5B	1224	6195	19	0	7	12	124	4	45	75	0.576863	0.615828	0.807836	0.796999	0.789489	0.684997	0.995041	1	1	1	0.845351	0.854743	0.445463	0.227207
ITPR1	1504	5805	28	3	4	21	316	16	91	209	0.985636	0.965865	0.807929	0.97144	0.941001	0.992627	0.995041	1	1	1	2.15023	0.912281	0.959873	0.248447
MCPH1	2194	4848	23	4	4	15	69	14	15	40	0.68594	0.796825	0.810072	0.719909	0.695485	0.72088	0.995041	0.998286	0.986255	1	1.32828	0.895941	0.772763	0.405943
MCC	1310	5878	27	4	4	18	112	10	18	66	0.872596	0.727641	0.810705	0.753424	0.95815	0.924915	0.995041	0.998859	1	1	2.10188	1.62367	0.954359	0.979124
TTC7B	1287	6017	15	0	1	14	91	5	25	60	0.83871	0.9928	0.812174	0.980873	0.89694	0.964101	0.995041	1	1	1	5.98142	1.07666	0.995186	0.661188
COL16A1	1179	6244	10	0	2	8	150	9	53	88	0.736607	0.93406	0.814306	0.585177	0.757829	0.637307	0.995041	0.977554	0.998383	1	1.52621	0.647917	0.809904	0.00876242
CASZ1	1400	6007	13	2	2	8	176	11	58	99	0.983577	0.929155	0.815526	0.861881	0.933503	0.922771	0.995041	1	1	1	2.13971	0.819814	0.91366	0.131717
TNFRSF10B	2327	4755	12	1	2	9	23	4	5	14	0.636364	0.828647	0.815634	0.668871	0.486053	0.317764	0.995041	0.996691	0.948231	0.887816	1.88154	1.35471	0.880597	0.79527
KDM4B	1132	6218	12	1	2	8	120	4	52	63	0.983082	0.974723	0.815939	0.733459	0.470582	0.773213	0.995041	0.998859	0.948231	1	1.81769	0.568028	0.869101	0.00183741
ATP8B1	1880	5582	21	5	4	11	99	13	17	67	0.847388	0.396606	0.816047	0.803194	0.718476	0.798603	0.995041	1	0.986255	1	1.2497	1.61726	0.737009	0.976756
ITGA4	416	6752	10	0	1	9	142	12	37	92	0.76	0.963933	0.816676	0.861795	0.806209	0.939234	0.995041	1	1	1	2.97453	0.866456	0.942477	0.257156
POSTN	1607	5482	19	0	4	15	151	16	30	104	0.201372	0.651077	0.81728	0.92888	0.698998	0.921135	0.995041	1	0.986255	1	1.27824	1.24983	0.750312	0.882848
PLCG2	1636	5594	28	1	5	22	160	11	49	99	0.701939	0.96353	0.819423	0.875561	0.861434	0.91847	0.995041	1	1	1	1.8761	0.89893	0.940159	0.294756
NLN	1405	5924	12	1	2	9	57	1	15	40	0.982456	0.842806	0.81944	0.932295	0.838686	0.769121	0.995041	1	1	1	1.52125	0.811334	0.808038	0.290385
RIPK4	1060	6192	14	2	3	9	98	13	27	58	0.802025	0.786175	0.821292	0.834167	0.908223	0.887993	0.995041	1	1	1	1.47081	1.19844	0.810439	0.816319
LRRC16A	581	6203	10	1	1	8	120	11	22	87	0.889076	0.868581	0.822232	0.588143	0.869159	0.640896	0.995041	0.977554	1	1	3.14249	1.52363	0.949956	0.974598
ZBED4	1664	5683	16	2	4	10	109	11	36	62	0.850307	0.812792	0.823426	0.571856	0.613891	0.751586	0.995041	0.975278	0.986255	1	1.03825	0.738311	0.624512	0.08991
FGFR2	1400	6033	10	0	1	9	110	5	26	78	0.84375	0.941216	0.823763	0.781375	0.925134	0.855971	0.995041	1	1	1	3.5595	1.21692	0.964297	0.83606
ALDH1B1	1374	5886	11	1	1	9	66	1	18	47	0.995238	0.957045	0.82418	0.881849	0.76205	0.797556	0.995041	1	1	1	4.61533	1.20511	0.984615	0.788551
ZBTB4	2261	5283	27	4	8	14	96	5	24	65	0.935711	0.267023	0.824524	0.770719	0.729762	0.655531	0.995041	1	0.986255	1	0.722024	1.16899	0.29912	0.778229
PIK3C2A	1039	6399	19	2	1	16	140	16	33	90	0.963077	0.993735	0.826228	0.861571	0.821775	0.814613	0.995041	1	1	1	5.10068	0.850113	0.991264	0.237756
ZC3H12C	1400	5958	10	0	2	8	87	5	23	59	0.689655	0.817363	0.826248	0.790193	0.827848	0.904999	0.995041	1	1	1	1.25027	0.842576	0.728184	0.277702
PRDM15	1059	6201	13	1	3	9	98	6	37	53	0.900121	0.921276	0.826841	0.762069	0.802216	0.875829	0.995041	1	1	1	1.28146	0.634959	0.745515	0.022679
VCAN	1415	5924	102	8	21	73	548	45	124	376	0.639224	0.735888	0.826936	0.936708	0.826117	0.881308	0.995041	1	1	1	1.06152	0.937553	0.634498	0.279697
TRIM2	1344	6224	10	1	1	7	71	6	22	43	0.951724	0.96006	0.827141	0.824624	0.957881	0.988144	0.995041	1	1	1	3.28921	0.859681	0.954935	0.321046
HERC6	1237	6359	10	0	1	9	104	9	23	70	0.727273	0.938932	0.828309	0.769062	0.524536	0.612723	0.995041	1	0.948231	1	2.92141	1.08671	0.939862	0.673747
ATHL1	1291	6174	10	2	3	5	56	4	24	28	0.96869	0.797553	0.830336	0.700721	0.808191	0.700976	0.995041	0.996691	1	1	0.772552	0.5601	0.490488	0.0260685
RIOK1	660	6103	14	1	0	2	85	3	8	30	1	1	0.831104	0.919514	0.946497	0.918606	0.995041	1	1	1	Inf	1.26948	1	0.781739
OBSL1	725	6618	20	1	6	13	186	13	70	102	0.702261	0.845637	0.831713	0.60778	0.647601	0.44043	0.995041	0.977554	0.986255	0.948438	1.1344	0.736202	0.682077	0.0290822
HINFP	1389	5956	11	1	2	8	50	1	10	39	0.967033	0.657323	0.831912	0.853112	0.833968	0.954354	0.995041	1	1	1	1.53717	1.36638	0.812263	0.853788
SLC7A2	2258	4810	12	0	3	9	46	2	14	30	0.701754	0.787126	0.832079	0.858451	0.877117	0.527567	0.995041	1	1	0.96264	1.17607	0.868055	0.70064	0.383591
PTPRS	1133	6214	26	3	6	17	192	15	53	124	0.876771	0.727986	0.83348	0.893181	0.848728	0.891203	0.995041	1	1	1	1.45464	1.14407	0.846651	0.817435
ELF1	1667	5421	13	3	0	10	70	11	15	44	1	1	0.833896	0.967417	0.957044	0.866294	0.995041	1	1	1	Inf	1.11434	1	0.689028
NLRC5	1427	5804	52	6	15	31	238	34	73	130	0.496068	0.723328	0.834956	0.791077	0.637157	0.745825	0.995041	1	0.986255	1	1.06124	0.915863	0.628371	0.292016
POLI	1859	5601	10	2	2	3	65	7	12	30	0.852964	0.471807	0.835429	0.840857	0.673785	0.718792	0.995041	1	0.986255	1	0.705773	0.823402	0.477957	0.332608
PRDM10	1362	5966	12	0	0	12	100	8	23	68	1	1	0.83546	0.950697	0.896945	0.915635	0.995041	1	1	1	Inf	1.21566	1	0.823793
ECE1	1430	6084	17	0	3	13	84	2	28	54	0.823864	0.939493	0.836094	0.809064	0.727612	0.90617	0.995041	1	0.986255	1	1.93664	0.877871	0.91297	0.324734
UBXN11	1443	6097	13	4	3	6	74	3	16	35	0.994337	0.593444	0.837765	0.893476	0.731919	0.900127	0.995041	1	0.986255	1	0.966012	0.931512	0.59775	0.458295
WDR6	1793	5723	22	3	5	14	108	5	23	80	0.946216	0.452182	0.837841	0.785297	0.743098	0.775098	0.995041	1	0.991076	1	1.1799	1.4022	0.705925	0.942248
HPS4	1411	5929	12	0	3	8	82	4	33	45	0.722672	0.902242	0.838133	0.76137	0.882842	0.820953	0.995041	1	1	1	1.05559	0.563782	0.643501	0.00901481
LAMA3	1214	6001	36	3	4	28	264	28	63	173	0.860134	0.980955	0.83834	0.772249	0.854331	0.869234	0.995041	1	1	1	2.72307	1.08923	0.990026	0.742942
SCAF1	882	6165	11	4	2	3	130	28	29	59	0.894786	0.542744	0.840111	0.89157	0.857111	0.843889	0.995041	1	1	1	0.879674	0.940341	0.591583	0.430955
LZTR1	1300	5968	32	2	5	21	111	6	24	75	0.84368	0.784716	0.841	0.968992	0.985603	0.966011	0.995041	1	1	1	1.93475	1.42908	0.947496	0.952894
SLC4A7	1544	5863	26	5	6	15	121	13	19	87	0.738311	0.202024	0.841654	0.78138	0.698408	0.775254	0.995041	1	0.986255	1	0.891863	1.53338	0.482038	0.970271
KIAA1211	864	6517	16	1	1	9	99	11	30	47	0.92691	0.9911	0.841962	0.820424	0.720687	0.851022	0.995041	1	0.986255	1	3.47541	0.630723	0.961816	0.0327498
STK11	1317	6064	56	26	2	28	74	33	15	26	0.998237	0.999687	0.842894	0.99072	0.984252	0.996776	0.995041	1	1	1	9.11873	1.27818	0.999997	0.830845
BRCA1	913	6148	26	6	4	12	158	22	31	105	0.922901	0.527459	0.843776	0.949958	0.894829	0.581322	0.995041	1	1	0.989999	1.27017	1.11994	0.746226	0.742365
P4HA2	1208	5938	10	1	2	7	65	4	22	39	0.931582	0.886765	0.844282	0.813103	0.718546	0.830594	0.995041	1	0.986255	1	1.4918	0.695042	0.801267	0.108788
EDC4	1482	5728	18	3	3	12	118	8	38	68	0.985755	0.939466	0.844779	0.867238	0.769642	0.819373	0.995041	1	1	1	1.75052	0.78667	0.881313	0.136047
LOXL2	2321	4760	15	1	3	11	90	4	32	54	0.93101	0.931376	0.845129	0.933743	0.860497	0.89844	0.995041	1	1	1	1.67836	0.734282	0.865464	0.101363
MYLK	492	6093	13	1	3	9	263	14	83	164	0.896087	0.82268	0.846163	0.891872	0.984348	0.974641	0.995041	1	1	1	1.2192	0.851972	0.719833	0.129069
INPP5B	975	6342	10	1	1	8	82	8	21	53	0.922581	0.94724	0.847997	0.869932	0.886317	0.906019	0.995041	1	1	1	3.50347	1.07514	0.962665	0.653184
GPATCH8	908	6128	14	1	3	9	179	23	34	120	0.483899	0.525992	0.848484	0.719379	0.636635	0.752772	0.995041	0.998286	0.986255	1	1.01254	1.17038	0.613761	0.817955
ITGA2	1112	6092	16	0	3	13	100	12	30	57	0.384496	0.942853	0.849284	0.851563	0.798066	0.910582	0.995041	1	1	1	1.41344	0.684976	0.792604	0.0583312
PLD2	2138	5384	22	2	7	13	94	9	36	47	0.739261	0.824435	0.849436	0.528109	0.436926	0.765574	0.995041	0.955217	0.948231	1	0.883307	0.561064	0.472159	0.00658215
LRRC8A	1154	6097	11	1	3	7	89	3	36	49	0.962702	0.863071	0.84948	0.679701	0.683293	0.673237	0.995041	0.996691	0.986255	1	1.42836	0.743936	0.797549	0.107525
PHLPP1	1869	5568	31	7	7	17	101	14	23	61	0.86544	0.525559	0.849825	0.87975	0.556367	0.788702	0.995041	1	0.962693	1	1.21475	1.34261	0.737416	0.912192
MLLT4	1586	5819	31	8	4	19	191	28	40	121	0.974854	0.853092	0.850848	0.90719	0.949295	0.763313	0.995041	1	1	1	2.03053	1.19293	0.948421	0.858598
SAFB	1122	6216	14	0	0	14	81	16	16	48	1	1	0.852208	0.812621	0.817863	0.476253	0.995041	1	1	0.958965	Inf	1.12001	1	0.698339
DEAF1	1276	6177	11	2	3	6	60	4	24	32	0.96869	0.815023	0.852339	0.859803	0.807021	0.816627	0.995041	1	1	1	1.19487	0.634773	0.710924	0.059882
FAT4	1279	6323	31	0	6	25	340	21	85	232	0.278616	0.869763	0.852808	0.757068	0.757293	0.920698	0.995041	1	0.998383	1	1.45301	0.996933	0.849799	0.51138
SH3TC1	1197	6224	19	3	5	10	160	9	61	88	0.983152	0.800313	0.85514	0.934816	0.943295	0.965566	0.995041	1	1	1	1.26781	0.735426	0.753537	0.0388883
FNDC1	1570	5871	27	3	5	16	164	10	39	104	0.929916	0.717665	0.85569	0.92164	0.697954	0.647737	0.995041	1	0.986255	1	1.53884	1.11104	0.863907	0.741147
TLN1	1326	5838	31	3	3	25	199	13	43	143	0.965959	0.967182	0.856614	0.817952	0.835884	0.912546	0.995041	1	1	1	3.68535	1.48337	0.99701	0.992477
KIAA2026	1814	5354	33	5	6	22	189	31	50	108	0.785965	0.908076	0.857316	0.715397	0.82324	0.660218	0.995041	0.998286	1	1	1.28492	0.777379	0.772427	0.0808741
YTHDC2	1305	5881	23	5	2	16	136	20	30	86	0.976746	0.961592	0.858005	0.892006	0.732618	0.908474	0.995041	1	0.986255	1	2.81524	0.947797	0.969312	0.431896
MEN1	618	6653	10	4	1	5	70	23	16	31	0.925664	0.915157	0.858338	0.813736	0.906604	0.982132	0.995041	1	1	1	2.78856	1.13285	0.930875	0.709674
OSBPL5	1273	6211	15	0	3	12	78	6	29	42	0.587956	0.969603	0.859908	0.753983	0.879382	0.724481	0.995041	0.998859	1	1	1.85796	0.720762	0.899833	0.10583
TCOF1	1075	6015	23	1	3	19	101	7	32	58	0.848554	0.991321	0.860508	0.907977	0.905368	0.876887	0.995041	1	1	1	2.63019	0.727413	0.976429	0.0920815
CARS	1282	6200	11	1	3	7	98	5	35	57	0.916612	0.797679	0.860759	0.834036	0.701961	0.88404	0.995041	1	0.986255	1	1.02371	0.669068	0.62619	0.0389926
DDX60	1374	6177	25	3	4	18	187	20	39	128	0.814776	0.788036	0.861759	0.670914	0.929976	0.817256	0.995041	0.996691	1	1	1.58814	1.09366	0.865365	0.716539
MALT1	1869	5586	16	2	2	12	62	8	13	41	0.841107	0.878079	0.862121	0.788474	0.854685	0.962323	0.995041	1	1	1	2.13419	1.13655	0.916233	0.705525
XPC	1501	5836	15	0	2	13	73	0	23	42	1	0.981805	0.862598	0.861617	0.930214	0.964585	0.995041	1	1	1	2.3019	0.646687	0.93313	0.0634192
FAT2	1092	6018	40	10	8	22	97	16	24	56	0.91724	0.714702	0.862747	0.818202	0.654693	0.627032	0.995041	1	0.986255	1	1.51255	1.14745	0.892498	0.753156
PTPRG	1684	5802	22	3	3	16	140	12	33	94	0.945969	0.898746	0.86308	0.934454	0.934846	0.883645	0.995041	1	1	1	1.97627	1.07797	0.921676	0.677458
RGS3	1137	6124	22	1	3	18	136	13	28	90	0.633545	0.897942	0.865157	0.765557	0.789737	0.88172	0.995041	1	1	1	2.50355	1.40079	0.969423	0.955528
SFMBT1	1802	5713	13	3	3	7	81	9	24	48	0.939909	0.706307	0.865932	0.815871	0.839805	0.888798	0.995041	1	1	1	0.95271	0.674836	0.581049	0.0746537
RXRA	1166	6080	11	1	2	7	63	5	23	34	0.912125	0.926	0.866142	0.870166	0.733682	0.830387	0.995041	1	0.986255	1	1.71413	0.809154	0.850378	0.249831
KANK1	1795	5348	20	2	5	13	116	7	38	70	0.910013	0.809541	0.867307	0.887433	0.816098	0.873663	0.995041	1	1	1	1.18582	0.738539	0.709364	0.0816023
TRANK1	1605	5842	52	7	12	33	381	23	104	253	0.981174	0.692693	0.870525	0.880909	0.731421	0.911543	0.995041	1	0.986255	1	1.09291	0.949294	0.658349	0.34447
CES2	1474	5735	12	1	3	8	58	4	23	31	0.888289	0.902714	0.871407	0.96052	0.9683	0.889353	0.995041	1	1	1	1.24368	0.61283	0.73021	0.0487858
HPS1	1534	6014	13	3	2	8	84	10	31	43	0.981848	0.95901	0.871475	0.806627	0.934056	0.865037	0.995041	1	1	1	2.34991	0.682233	0.934776	0.0656487
CTBP2	1416	6017	18	2	3	12	99	6	35	58	0.969299	0.952685	0.871674	0.897075	0.950991	0.778776	0.995041	1	1	1	1.9558	0.786619	0.915705	0.152927
RREB1	659	6110	15	2	3	10	168	16	65	86	0.940404	0.959567	0.871961	0.883344	0.812384	0.952305	0.995041	1	1	1	1.60927	0.654963	0.848701	0.00582415
AGTPBP1	1197	6171	12	0	2	10	116	14	28	72	0.459831	0.886136	0.872139	0.901075	0.768106	0.648546	0.995041	1	1	1	1.51748	0.910486	0.807076	0.368522
DICER1	1301	5989	20	1	2	17	204	17	45	142	0.81669	0.958898	0.873802	0.631097	0.894341	0.886304	0.995041	0.992265	1	1	2.69664	1.02539	0.962994	0.586133
APCDD1	1194	5920	11	1	2	8	47	3	15	29	0.920301	0.89707	0.873945	0.7269	0.931501	0.749112	0.995041	0.998859	1	1	1.73679	0.897342	0.854918	0.419058
SFXN4	1444	6052	11	0	1	10	29	4	9	16	0.714286	0.98714	0.873963	0.671526	0.692847	0.750957	0.995041	0.996691	0.986255	1	3.8913	0.864733	0.973095	0.426549
NCOR2	603	6467	20	2	3	14	316	28	91	171	0.909106	0.963009	0.874387	0.922283	0.788619	0.867535	0.995041	1	1	1	2.22412	0.870095	0.947818	0.155206
ADAMTS2	1007	5967	13	2	2	8	106	6	42	58	0.99064	0.960774	0.876341	0.880357	0.828069	0.840651	0.995041	1	1	1	1.99074	0.621449	0.895657	0.0130758
ZCCHC2	1870	5570	13	2	3	7	69	4	22	43	0.962445	0.717743	0.877123	0.843648	0.83474	0.915096	0.995041	1	1	1	1.17273	0.799588	0.699101	0.231237
RAP1GAP2	2122	5406	10	0	2	8	49	3	20	25	0.77	0.967826	0.877495	0.984214	0.896119	0.89201	0.995041	1	1	1	1.72247	0.559802	0.852243	0.0375718
QARS	1787	5727	14	1	3	10	71	3	18	49	0.893676	0.726056	0.877805	0.965634	0.784178	0.727854	0.995041	1	1	1	1.30801	1.13361	0.755085	0.718523
KIAA0922	1351	6223	13	1	2	10	140	6	42	92	0.95395	0.925339	0.878028	0.857632	0.82482	0.658067	0.995041	1	1	1	1.65267	0.763376	0.838664	0.0876311
COL4A2	1162	5669	19	2	4	13	197	14	49	134	0.867648	0.708332	0.878204	0.929292	0.939391	0.891378	0.995041	1	1	1	1.41159	1.08318	0.805765	0.710442
CSPG4	970	6424	21	1	5	15	232	15	77	140	0.7474	0.884986	0.881078	0.854127	0.625546	0.799867	0.995041	1	0.986255	1	1.37933	0.871786	0.804391	0.182877
KLHL18	1769	5749	11	0	2	9	70	7	24	38	0.61553	0.957272	0.882021	0.706136	0.816758	0.677004	0.995041	0.996691	1	1	1.81664	0.723292	0.86949	0.127686
TRIM16	2177	5351	11	2	2	7	37	2	12	23	0.981373	0.864235	0.882651	0.986576	0.983706	0.936896	0.995041	1	1	1	1.811	0.838425	0.868535	0.365642
PDE4DIP	292	5938	21	3	4	14	475	41	124	310	0.92814	0.799909	0.883383	0.811148	0.837723	0.537083	0.995041	1	1	0.97313	1.58515	1.0317	0.862382	0.63413
EVPL	519	6010	13	1	2	10	159	6	52	97	0.967519	0.953826	0.883706	0.683667	0.747674	0.86578	0.995041	0.996691	0.99224	1	2.50588	0.876182	0.947435	0.244538
GRK5	1445	6054	11	3	2	6	50	3	16	31	0.993506	0.816087	0.884512	0.92256	0.769238	0.802267	0.995041	1	1	1	1.99779	0.943402	0.896593	0.476587
UBE4B	1401	6015	16	2	3	11	168	19	55	93	0.886147	0.933917	0.886183	0.874674	0.898661	0.866983	0.995041	1	1	1	1.4708	0.681915	0.811044	0.0151373
KLHL36	1648	5589	13	1	4	8	68	5	28	35	0.831044	0.848895	0.886656	0.785629	0.809704	0.840958	0.995041	1	1	1	0.936314	0.618636	0.56471	0.038046
EPS8L2	1272	6179	11	4	2	5	59	10	19	29	0.972249	0.834312	0.886994	0.923801	0.932498	0.869628	0.995041	1	1	1	1.39632	0.759402	0.777914	0.211204
F2R	1435	5907	12	0	1	11	60	3	13	43	0.823529	0.952897	0.887489	0.928546	0.951922	0.98503	0.995041	1	1	1	4.90048	1.54211	0.987983	0.940515
PTK2B	2241	4803	31	1	8	22	91	3	37	50	0.851017	0.962684	0.887694	0.911588	0.701029	0.913708	0.995041	1	0.986255	1	1.22028	0.596517	0.747444	0.0119426
DOCK5	2286	4782	37	4	4	29	81	8	19	53	0.929677	0.9753	0.887738	0.8955	0.965777	0.892976	0.995041	1	1	1	2.96435	1.10723	0.994418	0.690732
SPTAN1	1152	6089	63	14	13	36	251	29	68	153	0.98963	0.773733	0.887803	0.855996	0.6241	0.812923	0.995041	1	0.986255	1	1.28713	0.940527	0.828844	0.357556
TNPO1	1435	5907	11	2	0	9	86	17	14	53	1	1	0.888304	0.795476	0.811413	0.689412	0.995041	1	1	1	Inf	1.25124	1	0.813968
PLEKHA5	506	6154	12	2	0	10	121	25	24	72	1	1	0.888344	0.944033	0.889531	0.632307	0.995041	1	1	1	Inf	0.987137	1	0.516067
B2M	1257	6272	15	12	0	3	63	42	5	15	1	1	0.88858	0.823199	0.86605	0.849626	0.995041	1	1	1	Inf	1.72846	1	0.91624
IL6ST	1251	5995	14	4	1	9	75	10	12	49	0.975201	0.886993	0.89471	0.768127	0.984282	0.837055	1	1	1	1	3.14273	1.19043	0.950986	0.751855
MLH1	1599	5843	11	6	0	5	91	22	20	47	1	1	0.897406	0.911608	0.830314	0.831054	1	1	1	1	Inf	0.90791	1	0.40012
NDOR1	1120	6047	11	1	3	7	54	3	19	32	0.901338	0.78365	0.89819	0.928367	0.924254	0.933121	1	1	1	1	1.02312	0.73849	0.629977	0.183384
DIP2C	1070	5875	17	2	2	12	206	17	55	132	0.953928	0.944945	0.898244	0.737864	0.604377	0.837367	1	0.998859	0.986255	1	3.24896	1.18988	0.981106	0.880109
DOPEY2	998	6260	30	5	6	19	250	27	77	146	0.952829	0.902876	0.898853	0.882189	0.887537	0.888953	1	1	1	1	1.53632	0.848873	0.876706	0.13482
KIF13B	2160	4862	32	5	7	20	125	11	31	81	0.915739	0.656871	0.898857	0.759535	0.878507	0.886707	1	1	1	1	1.18269	1.06824	0.716704	0.657533
TJP1	1241	6267	30	3	4	23	176	25	32	117	0.641261	0.85408	0.899808	0.697611	0.697449	0.88815	1	0.996691	0.986255	1	1.89077	1.209	0.930961	0.855686
TNRC6B	1558	5820	21	7	4	10	184	37	36	109	0.870199	0.487311	0.900738	0.957995	0.964106	0.846199	1	1	1	1	1.12087	1.15645	0.668362	0.804837
RHOBTB2	2324	4758	13	1	3	9	59	4	19	36	0.855556	0.835082	0.901899	0.62551	0.256661	0.251099	1	0.991659	0.867967	0.873416	1.25026	0.811569	0.732934	0.271923
FAM160B1	1448	6048	13	1	2	10	83	5	22	56	0.906404	0.887911	0.902866	0.980144	0.991962	0.974229	1	1	1	1	1.73541	0.874878	0.855648	0.334477
DIS3	1432	5552	14	1	0	13	76	9	23	43	1	1	0.903883	0.980334	0.980279	0.978069	1	1	1	1	Inf	0.616338	1	0.0414335
MGA	1342	6208	43	15	7	21	343	76	74	190	0.962811	0.706216	0.904835	0.888555	0.944458	0.733543	1	1	1	1	1.42227	0.94585	0.85147	0.359509
AMBRA1	808	6548	13	4	3	6	161	24	38	99	0.909889	0.487554	0.905389	0.905329	0.924945	0.732703	1	1	1	1	1.14987	1.13978	0.688391	0.783429
CNDP2	1884	5532	11	0	2	9	57	4	21	30	0.720798	0.967934	0.905457	0.865125	0.704124	0.722622	1	1	0.986255	1	1.98858	0.673382	0.895369	0.104029
ACTN1	1381	5998	12	0	2	10	95	4	37	53	0.820598	0.980248	0.907927	0.9166	0.935627	0.940653	1	1	1	1	2.06819	0.637225	0.906361	0.0228248
SREBF1	2071	5412	18	3	2	12	84	4	20	60	0.993339	0.893343	0.909937	0.909623	0.978614	0.935971	1	1	1	1	2.81451	1.40725	0.965304	0.929037
TRPV2	2158	5355	11	1	2	7	62	4	19	37	0.915385	0.861393	0.911233	0.919839	0.903532	0.961913	1	1	1	1	1.82145	0.934692	0.869724	0.453307
LAMA4	1543	5857	37	4	8	25	263	22	75	163	0.878004	0.853892	0.911946	0.772823	0.765955	0.63194	1	1	1	1	1.17964	0.846921	0.719767	0.129077
AP1G1	1516	5703	11	3	2	6	87	9	26	50	0.977733	0.818462	0.912516	0.877239	0.870969	0.908329	1	1	1	1	1.36202	0.759586	0.764892	0.148612
CYFIP1	1166	6291	21	0	5	16	162	9	74	79	0.575292	0.992207	0.912576	0.835682	0.799128	0.693211	1	1	1	1	1.37353	0.48723	0.802496	6.5751e-06
SIK3	1423	5940	17	5	4	8	143	16	40	77	0.973788	0.637474	0.916341	0.932102	0.890859	0.962299	1	1	1	1	1.14718	0.812586	0.685291	0.162308
IKBKB	998	5358	11	3	1	7	75	6	24	44	0.997283	0.96623	0.917523	0.863663	0.954953	0.970589	1	1	1	1	3.12995	0.815092	0.948788	0.240426
PIKFYVE	622	6671	19	1	3	15	220	18	56	144	0.752088	0.911506	0.91873	0.946555	0.817486	0.91426	1	1	1	1	1.62546	0.854457	0.855334	0.175512
PARP4	1459	5646	24	1	4	19	168	6	50	112	0.903704	0.948336	0.918734	0.931092	0.926423	0.901034	1	1	1	1	1.56946	0.759947	0.859146	0.0645926
SPRY1	1273	6325	13	2	2	9	32	3	6	23	0.881119	0.720944	0.920318	0.688018	0.900063	0.916081	1	0.996691	1	1	1.67363	1.39469	0.843066	0.826108
COL7A1	1787	5714	29	6	6	17	229	24	52	152	0.94008	0.562198	0.921469	0.979622	0.909265	0.876175	1	1	1	1	1.25996	1.15577	0.757831	0.837407
PPRC1	1509	6019	22	2	4	16	175	15	41	117	0.799978	0.799071	0.923512	0.495948	0.814421	0.429699	1	0.94954	1	0.944364	1.5156	1.06984	0.842061	0.674292
TRIM8	1504	6023	16	1	3	12	47	1	15	31	0.968421	0.898517	0.923644	0.938458	0.693288	0.866783	1	1	0.986255	1	1.9269	1.02768	0.910546	0.589081
PTPRJ	796	6598	12	1	0	11	150	6	40	104	1	1	0.92472	0.938115	0.912585	0.8929	1	1	1	1	Inf	1.03846	1	0.611354
MAML2	1135	6121	14	2	4	8	97	6	34	47	0.944081	0.809912	0.927842	0.793999	0.73616	0.70607	1	1	0.986255	1	0.664574	0.478884	0.349401	0.000978535
DMBT1	1415	6034	10	2	2	5	128	12	33	82	0.935146	0.648904	0.929536	0.904981	0.865308	0.940693	1	1	1	1	1.15125	1.04659	0.697216	0.622017
ITGA1	1105	6090	13	1	1	11	127	9	36	82	0.958372	0.985545	0.929937	0.948903	0.981583	0.82789	1	1	1	1	3.5103	0.780067	0.963975	0.125319
NBEA	1565	5528	24	2	2	19	105	10	24	70	0.915803	0.977945	0.931102	0.816841	0.874519	0.920982	1	1	1	1	2.93247	1.00321	0.973665	0.543753
PCLO	288	5623	11	2	1	8	132	16	27	88	0.946245	0.908626	0.932587	0.966026	0.963027	0.822418	1	1	1	1	2.24771	1.0198	0.892312	0.570845
AP3D1	1307	6079	11	2	3	6	128	3	51	72	0.997088	0.793893	0.933378	0.884597	0.917086	0.856291	1	1	1	1	0.900169	0.644239	0.564591	0.0110989
CSDE1	1137	6208	12	4	2	5	112	18	22	71	0.92456	0.535654	0.934868	0.760281	0.726756	0.639425	1	1	0.986255	1	1.00284	1.24596	0.634247	0.849112
TECPR2	1265	5996	17	2	2	13	135	11	47	76	0.973597	0.990537	0.935449	0.896555	0.986431	0.934989	1	1	1	1	2.64729	0.710565	0.95772	0.0396917
HIVEP1	618	6131	15	2	2	11	252	26	62	164	0.917636	0.90627	0.937542	0.83256	0.932903	0.852837	1	1	1	1	2.29927	1.02697	0.932894	0.59593
WHSC1	1184	6149	13	2	2	9	166	18	45	103	0.923775	0.889718	0.937626	0.964749	0.988823	0.975512	1	1	1	1	1.81479	0.863035	0.86968	0.228319
IPO11	1362	5946	14	2	1	11	72	10	18	43	0.951057	0.981344	0.938026	0.969662	0.97338	0.912252	1	1	1	1	3.48119	0.789715	0.963533	0.234127
MAP2K4	2240	5295	38	16	1	20	56	12	8	36	0.99865	0.977823	0.93982	0.997622	0.997707	0.943191	1	1	1	1	8.74292	1.84946	0.999601	0.968706
MTMR3	1420	5878	12	1	1	10	107	8	34	64	0.961945	0.989107	0.940661	0.957438	0.968718	0.942604	1	1	1	1	3.71094	0.684638	0.969448	0.0469455
ARID1B	1586	5855	51	15	8	22	244	46	44	140	0.926958	0.45032	0.940912	0.893977	0.58419	0.554852	1	1	0.978031	0.981113	1.47904	1.44	0.882079	0.989096
MLLT10	1017	6036	15	3	2	10	106	20	17	67	0.762664	0.737939	0.941297	0.740472	0.867655	0.945721	1	0.998859	1	1	1.62622	1.26967	0.832994	0.845109
SEMA3F	1796	5710	19	5	3	11	82	5	27	47	0.998765	0.923392	0.94272	0.933134	0.917242	0.729541	1	1	1	1	1.83903	0.785911	0.897594	0.186672
FAT1	1482	6010	130	45	29	56	649	159	141	347	0.910137	0.198251	0.94293	0.947453	0.979406	0.959491	1	1	1	1	1.07667	1.11752	0.668601	0.884358
CREBBP	677	6144	33	6	2	25	379	68	76	230	0.973473	0.994632	0.943416	0.96124	0.965711	0.919042	1	1	1	1	5.46561	1.31366	0.999391	0.986456
ATP11A	1173	5665	15	1	5	9	137	7	51	77	0.840647	0.717196	0.943766	0.839177	0.876626	0.826363	1	1	1	1	0.861619	0.684227	0.488271	0.0223728
CENPE	1278	6348	22	4	1	17	195	15	32	148	0.995526	0.968164	0.94416	0.842162	0.934427	0.775062	1	1	1	1	5.40277	1.28637	0.993505	0.921062
SORBS2	1484	6026	23	3	4	16	139	24	36	77	0.713572	0.912483	0.946498	0.953684	0.841381	0.924967	1	1	1	1	1.51218	0.784092	0.841486	0.132378
PLCB1	488	5625	11	2	0	9	140	8	40	91	1	1	0.946608	0.829463	0.980323	0.886963	1	1	1	1	Inf	0.766033	1	0.0959651
MYO5B	1840	5642	24	2	5	17	146	7	56	81	0.959453	0.972156	0.946931	0.888433	0.850437	0.867752	1	1	1	1	1.33236	0.594802	0.784939	0.00202635
FANCD2	1497	5807	14	6	2	6	140	25	36	79	0.987106	0.77115	0.947902	0.915632	0.924752	0.984903	1	1	1	1	1.18232	0.844517	0.705648	0.222862
C3	1050	6289	19	5	3	11	324	23	95	203	0.998479	0.870628	0.948946	0.975493	0.981433	0.966922	1	1	1	1	2.06812	0.998294	0.931023	0.515909
MKI67	1414	6026	56	10	8	37	456	53	112	291	0.986031	0.951766	0.949251	0.951718	0.965766	0.991721	1	1	1	1	1.9285	0.976494	0.976742	0.432496
SEMA6A	1299	5888	12	0	1	11	108	10	39	58	0.8	0.997187	0.952328	0.89389	0.915086	0.961079	1	1	1	1	4.28716	0.58961	0.980734	0.00798215
DDX41	998	5966	11	1	2	8	62	3	17	42	0.933371	0.829794	0.952823	0.905995	0.943749	0.765107	1	1	1	1	1.71085	1.13218	0.850035	0.71288
ZBTB7A	1245	6143	12	1	2	9	37	0	15	21	1	0.967538	0.954741	0.964888	0.960285	0.971478	1	1	1	1	2.29309	0.713405	0.928798	0.202366
PVRL1	1400	5955	18	3	4	10	82	3	24	51	0.990439	0.707238	0.955461	0.918491	0.93838	0.907328	1	1	1	1	1.5097	1.02582	0.837774	0.583758
GSR	2093	4926	14	3	2	9	34	4	12	18	0.974888	0.958491	0.955652	0.94735	0.892925	0.973605	1	1	1	1	2.09907	0.699689	0.910029	0.212082
GPS2	2263	5274	14	10	1	3	29	11	6	11	0.983575	0.832749	0.956224	0.963045	0.980928	0.996157	1	1	1	1	3.12289	0.983133	0.949141	0.564961
LAMB2	1787	5724	39	6	8	25	164	5	51	107	0.999378	0.868876	0.958862	0.938139	0.889343	0.801377	1	1	1	1	1.33332	0.766876	0.817222	0.0712178
CUBN	1010	6016	19	2	3	13	78	5	19	54	0.925258	0.822456	0.959313	0.933598	0.921048	0.856793	1	1	1	1	1.80059	1.09931	0.892312	0.681304
ENC1	1441	5892	15	1	3	11	66	2	21	43	0.951453	0.878375	0.961458	0.843877	0.96901	0.963232	1	1	1	1	1.58811	0.831865	0.844001	0.284085
MTOR	1388	6042	39	0	7	32	280	16	59	205	0.20485	0.793696	0.964539	0.703923	0.901649	0.862761	1	0.996691	1	1	1.79115	1.43444	0.950376	0.995312
VCAM1	1216	6225	14	0	0	14	126	7	29	90	1	1	0.969013	0.901975	0.975846	0.88992	1	1	1	1	Inf	1.16384	1	0.791105
PASK	903	6437	19	4	5	10	139	7	58	74	0.997338	0.856178	0.969018	0.925275	0.974908	0.95847	1	1	1	1	1.20191	0.584673	0.718842	0.00150475
RBM47	1149	6334	10	0	0	10	126	12	30	56	1	1	0.969144	0.9749	0.935394	0.964914	1	1	1	1	Inf	0.961993	1	0.469782
OTUD4	1250	6311	16	3	0	13	118	14	32	64	1	1	0.969803	0.941362	0.973521	0.999629	1	1	1	1	Inf	0.631841	1	0.0224395
FLI1	1370	5960	10	0	1	9	55	3	17	35	0.857143	0.976923	0.969886	0.908938	0.890245	0.920247	1	1	1	1	3.71294	0.873633	0.96838	0.371849
PPP6C	1132	6103	10	3	0	7	43	3	13	27	1	1	0.970394	0.990962	0.991161	0.992464	1	1	1	1	Inf	0.752887	1	0.243088
DOT1L	1308	6077	21	7	5	8	175	10	60	105	0.999788	0.549163	0.970477	0.981256	0.984602	0.802689	1	1	1	1	1.205	0.857406	0.720902	0.189144
LATS2	1482	5637	10	1	1	7	125	12	39	72	0.943396	0.966734	0.974215	0.97458	0.982251	0.976485	1	1	1	1	3.44106	0.860265	0.960041	0.249972
TSC2	670	6129	24	4	4	16	166	15	63	86	0.988306	0.987538	0.974744	0.995471	0.993545	0.976391	1	1	1	1	2.08764	0.699563	0.950974	0.0181277
FBXO30	1493	5920	10	1	1	8	77	5	16	56	0.940711	0.894435	0.975229	0.967124	0.986508	0.991444	1	1	1	1	2.55902	1.04849	0.918112	0.611386
ZFP36L1	1388	5984	15	8	1	4	83	33	18	30	0.976301	0.903036	0.975286	0.894104	0.868252	0.945239	1	1	1	1	2.59675	0.84154	0.919329	0.322298
VCL	1211	6164	17	4	3	9	74	4	19	51	0.993339	0.681892	0.975367	0.979372	0.998599	0.999143	1	1	1	1	1.48195	1.05296	0.814446	0.620427
FAM65A	1479	5737	18	2	2	14	96	8	29	59	0.961193	0.981026	0.975382	0.989214	0.990831	0.941246	1	1	1	1	3.28886	0.907273	0.982931	0.368898
EDIL3	1429	5910	13	3	1	9	45	6	12	27	0.982775	0.969069	0.976617	0.984985	0.885393	0.98749	1	1	1	1	3.15006	0.739786	0.95129	0.234725
NCOR1	2169	5340	74	22	13	38	266	36	58	169	0.996487	0.566835	0.976691	0.946455	0.990412	0.947712	1	1	1	1	1.23795	0.999946	0.796347	0.524427
JAK1	1068	6316	14	7	1	6	146	33	29	81	0.991854	0.882178	0.976701	0.983451	0.997009	0.981934	1	1	1	1	3.4493	1.16298	0.961008	0.789196
SUPT6H	804	6156	13	1	2	10	196	18	59	108	0.861246	0.956829	0.97694	0.89102	0.951556	0.906908	1	1	1	1	1.93181	0.714383	0.888817	0.0226145
PALLD	1375	6167	14	0	1	13	133	6	41	85	0.875	0.994988	0.977169	0.991937	0.986209	0.937635	1	1	1	1	4.69827	0.793329	0.98669	0.129479
MYO19	949	6103	11	2	2	7	86	7	27	51	0.965292	0.870864	0.977945	0.977162	0.921026	0.828073	1	1	1	1	1.40701	0.804007	0.779344	0.208809
MYH9	1514	5835	34	5	3	24	288	24	86	168	0.997261	0.997908	0.978411	0.89724	0.947119	0.98694	1	1	1	1	3.95967	0.91263	0.998304	0.261257
MED23	1442	5948	27	10	3	14	129	23	33	72	0.9965	0.931439	0.978638	0.997651	0.993406	0.994257	1	1	1	1	2.08524	0.838086	0.936478	0.223193
SLCO3A1	842	6369	10	1	2	7	117	3	42	72	0.984505	0.89713	0.979282	0.893573	0.981748	0.985196	1	1	1	1	1.78868	0.888255	0.863656	0.30112
STK10	1048	5973	19	1	3	15	101	13	33	54	0.689818	0.982064	0.983905	0.958458	0.728919	0.937692	1	1	0.986255	1	2.05535	0.734944	0.930365	0.0971499
KIAA1217	1021	6048	52	4	8	40	294	28	100	163	0.893158	0.999254	0.984281	0.996451	0.994622	0.993817	1	1	1	1	1.93427	0.641073	0.976584	0.000330166
APC	1319	5875	134	78	14	42	511	231	54	224	0.832451	0.21966	0.98641	0.98859	0.987467	0.746	1	1	1	1	1.47712	1.65003	0.93585	0.999888
ITGB2	1070	6164	16	1	1	14	140	11	64	64	0.977444	0.999943	0.986491	0.993917	0.992378	0.968761	1	1	1	1	6.53201	0.524894	0.996798	0.00014807
CABIN1	1342	5956	15	3	1	9	195	14	65	116	0.998705	0.987342	0.987047	0.987815	0.988232	0.967693	1	1	1	1	3.64267	0.772121	0.966577	0.0551347
SFI1	1452	5869	13	1	0	12	109	12	27	70	1	1	0.987803	0.992476	0.895104	0.993457	1	1	1	1	Inf	1.02001	1	0.572486
SETD2	1764	5746	82	31	6	45	244	74	24	146	0.899411	0.7403	0.988314	0.99783	0.998247	0.959115	1	1	1	1	2.99856	2.21432	0.999174	0.999983
C10orf76	1516	6020	14	2	1	11	47	3	12	31	0.987745	0.974795	0.988568	0.995228	0.936872	0.887278	1	1	1	1	4.60693	1.08775	0.985358	0.653159
AXIN1	697	6099	21	6	2	13	96	15	34	47	0.997344	0.99482	0.989514	0.977802	0.9974	0.988905	1	1	1	1	2.85835	0.588484	0.968544	0.0130168
COL6A2	1053	6168	27	0	6	21	205	7	76	121	0.602577	0.972673	0.990493	0.967764	0.949672	0.891447	1	1	1	1	1.60108	0.758407	0.894635	0.0347961
EVC	1203	6212	11	0	1	10	110	9	44	57	0.833333	0.997551	0.990536	0.986211	0.994271	0.977188	1	1	1	1	4.18715	0.570976	0.978662	0.00370993
NLGN2	2265	5277	16	3	2	11	71	4	22	45	0.994933	0.951478	0.991422	0.904507	0.938174	0.847894	1	1	1	1	2.91712	1.03867	0.96956	0.602969
JAG2	1252	5973	12	3	1	8	102	8	36	58	0.998304	0.985252	0.991625	0.988127	0.977615	0.996817	1	1	1	1	4.43364	0.73894	0.982345	0.0933214
VHL	1490	5818	175	82	8	82	40	12	7	20	0.999383	0.993694	0.992091	0.994378	0.998686	0.994907	1	1	1	1	5.55407	1.32995	1	0.80364
RASA1	1440	5889	30	17	1	12	126	34	17	70	0.998381	0.937261	0.992176	0.989483	0.99859	0.984755	1	1	1	1	7.70381	1.57701	0.999073	0.971856
TRAK1	1668	5816	16	6	3	6	139	11	49	78	0.999522	0.741827	0.992591	0.985731	0.99575	0.983631	1	1	1	1	0.949759	0.681168	0.58814	0.0223895
SLC26A6	1788	5714	11	2	0	9	55	4	24	27	1	1	0.994023	0.998874	0.997642	0.991835	1	1	1	1	Inf	0.520955	1	0.0140923
DEPDC5	1457	5868	27	7	3	16	174	16	49	109	0.999163	0.957007	0.994602	0.992141	0.996721	0.971889	1	1	1	1	2.59707	0.923741	0.975378	0.346756
IRF2	1482	6022	12	4	0	7	73	10	15	47	1	1	0.99461	0.996792	0.999347	0.99804	1	1	1	1	Inf	1.23875	1	0.805878
CDH11	1471	5766	37	3	7	27	223	9	81	133	0.982581	0.986818	0.994692	0.98809	0.993651	0.988963	1	1	1	1	1.61657	0.688537	0.913302	0.00531431
PSIP1	1869	5359	30	17	3	9	56	11	6	37	0.966194	0.303156	0.995749	0.996025	0.999665	0.995229	1	1	1	1	1.48719	1.95193	0.816948	0.96613
ATG7	1508	5818	10	5	1	4	60	0	21	39	1	0.883461	0.996564	0.998899	0.99893	0.997038	1	1	1	1	2.76829	0.642639	0.931057	0.0701049
PLXNB2	1664	5683	35	3	5	23	232	24	83	122	0.913781	0.995945	0.997231	0.995503	0.995442	0.929339	1	1	1	1	2.31521	0.755466	0.980091	0.028141
ANKRD11	1625	5591	55	11	12	31	301	27	107	163	0.998446	0.951755	0.997305	0.987972	0.999328	0.996729	1	1	1	1	1.25603	0.68084	0.798688	0.00127051
SMAD4	1841	5599	107	37	2	65	77	21	8	44	0.998588	0.997535	0.997735	0.999437	0.999838	0.999996	1	1	1	1	13.4078	2.17325	1	0.991997
KEAP1	747	6398	57	9	2	46	158	20	27	111	0.997297	0.998999	0.998154	0.99923	0.999928	0.999142	1	1	1	1	11.4577	2.01363	1	0.999847
USP54	1218	6167	13	4	2	7	140	9	35	95	0.996895	0.746085	0.99873	0.998483	0.99701	0.92436	1	1	1	1	1.65578	0.95562	0.839325	0.440962
CYLD	1318	5864	20	9	3	8	97	6	23	68	0.999872	0.568648	0.999738	0.999844	0.999901	0.999264	1	1	1	1	1.34792	0.946702	0.769189	0.449421
SMARCA4	748	6403	30	12	3	15	295	13	72	201	1	0.887527	0.999738	0.999931	0.996861	0.997184	1	1	1	1	3.49107	1.22769	0.995603	0.943525
TGFBR2	1563	5841	27	12	1	13	105	10	22	71	0.999993	0.973905	0.99989	0.998738	0.996421	0.999089	1	1	1	1	7.7351	1.37122	0.998958	0.925728
BRD7	1317	5871	14	11	0	3	72	16	13	42	1	1	0.999947	0.999937	0.999847	0.998553	1	1	1	1	Inf	1.21752	1	0.779159
NSD1	987	5958	71	29	9	33	284	48	55	180	0.999679	0.676516	0.999953	0.999987	0.99999	0.999917	1	1	1	1	1.65052	1.12995	0.945397	0.809324
RB1	1679	5386	101	78	6	15	150	65	16	67	0.995999	0.257049	0.999986	0.999999	1	0.999949	1	1	1	1	2.81249	1.9587	0.998228	0.997551
BAP1	1812	5692	65	32	5	27	80	9	15	55	0.999992	0.829241	0.999992	0.999981	0.999992	0.999929	1	1	1	1	3.62482	1.64764	0.999653	0.973257
TSC1	1165	6090	35	19	4	10	131	20	37	69	0.999988	0.775338	0.999995	0.999995	0.999994	0.999999	1	1	1	1	1.93152	0.730845	0.934966	0.0735087
FUBP1	1154	6251	54	37	5	8	71	15	16	39	0.99997	0.364404	1	0.999996	0.999975	0.999997	1	1	1	1	1.18277	0.827237	0.706046	0.299821
PBRM1	1815	5693	153	97	5	48	146	47	24	75	1	0.994471	1	1	1	1	1	1	1	1	5.55195	1.18127	1	0.797778
NF1	921	6108	79	54	2	20	385	140	71	171	1	0.994097	1	1	1	1	1	1	1	1	7.46183	1.12252	0.999978	0.822199
CDH1	1483	5718	88	64	7	15	122	19	21	79	1	0.205117	1	1	0.999969	1	1	1	1	1	1.91035	1.71135	0.965828	0.992294
CIC	814	6195	101	59	4	36	191	47	41	103	1	0.997463	1	1	1	0.999948	1	1	1	1	4.747	1.16295	0.999948	0.819921

## Sheet: 2) Normalized CADD
	Median_CADDnorm_HeZD	Median_CADDnorm_CNN	p_CADDnorm	q_norm	p_CADDnorm_OS_HeZD	p_CADDnorm_OS_CNN
INTS10	-1	0.0897287	0.000140649	0.166951	0.00145822	0.169105
BRPF1	-1	0.0494641	0.000406183	0.241069	0.00217847	0.444509
SMG1	-1	0.0211238	0.000981249	0.297902	0.00304398	0.87173
KIF20B	-0.401222	0.0799263	0.00110811	0.297902	0.00347466	0.218953
RTTN	-1	0.0541025	0.00125485	0.297902	0.00289072	0.327165
UPF2	-1	0.105013	0.00171318	0.338924	0.0258561	0.00939782
SORL1	-0.171374	0.101844	0.00219993	0.373045	0.000279947	0.796353
BRD1	-1	0.0992604	0.00259855	0.385559	0.00947051	0.13209
ACACA	-0.783658	0.144362	0.00308628	0.407046	0.00829668	0.0297147
SNX25	-0.182596	0.19934	0.00463873	0.484072	0.032783	0.0255392
REV3L	-0.0564137	0.131244	0.00368905	0.437891	0.0773875	0.000295169
MYO5A	-0.245767	0.119609	0.00570281	0.484072	0.020704	0.114572
RSF1	-1	0.032399	0.00541867	0.484072	0.0176108	0.743238
POLR2A	-0.263716	0.128258	0.00686509	0.493674	0.00284187	0.581566
PRICKLE2	-0.269945	0.0495573	0.00598202	0.484072	0.00134337	0.786281
PRPF8	-0.0362775	0.0955951	0.00896992	0.507014	0.00905438	0.684684
STXBP5	-1	0.0666961	0.00611716	0.484072	0.00384164	0.552286
ASCC3	-0.00430242	0.177829	0.00752914	0.493674	0.0993859	0.000235452
MST1R	-0.701954	0.08787	0.00791612	0.493674	0.00498965	0.491052
TLR4	-0.591426	0.0220147	0.011036	0.518431	0.00338679	0.996894
BUD13	-1	0.0362505	0.00831801	0.493674	0.0286271	0.39854
AP2A2	-0.558012	0.128984	0.0100241	0.518431	0.0115517	0.146691
NEURL4	-0.162659	0.139033	0.0107158	0.518431	0.0161078	0.506078
TTC3	-0.533167	0.0739787	0.00793825	0.493674	0.0120187	0.118287
PPIP5K2	-0.999398	0.0524475	0.0109005	0.518431	0.0104052	0.501701
PPP1R13B	-0.664882	0.173859	0.0117924	0.518431	0.0212868	0.16246
SREBF2	-1	0.0579235	0.011405	0.518431	0.0142625	0.819905
PI4KA	-0.268307	0.109765	0.0147393	0.603295	0.0252169	0.718272
MINK1	-0.72858	0.0743173	0.0152671	0.60407	0.00856018	0.819737
MYH10	-0.0520887	0.136385	0.0143996	0.603295	0.041848	0.169924
MON1B	-0.0813492	0.146086	0.019564	0.638933	0.0252169	0.339146
SYNJ2	-0.446994	0.0712939	0.0182134	0.638933	0.00572686	0.690156
EIF2AK4	-0.196078	0.137381	0.0177283	0.638933	0.0167974	0.617057
INTS9	-1	0.0919918	0.0197148	0.638933	0.010514	0.724226
CTCF	0.225865	0.634367	0.0209928	0.638933	0.758516	5.34638e-12
USP31	-0.759708	0.138314	0.0183004	0.638933	0.0399599	0.292105
RAPGEF6	-0.153717	0.381308	0.01983	0.638933	0.252018	4.97174e-06
ST5	-0.999466	0.15878	0.023868	0.67412	0.04278	0.231014
ARHGEF12	-0.198482	0.0699606	0.0207915	0.638933	0.0537983	0.128213
LRP4	-0.560488	0.129226	0.0231859	0.671259	0.0202462	0.814402
DDX24	-1	0.104974	0.0249884	0.67412	0.019783	0.400163
YLPM1	0.016673	0.135468	0.0201151	0.638933	0.32265	0.000103409
ATP2C2	-0.88683	0.111226	0.0230765	0.671259	0.0212868	0.635327
FIG4	-0.225254	0.0266223	0.0297485	0.707733	0.0207017	0.57263
AHI1	-0.203265	0.220156	0.0246763	0.67412	0.128065	0.00722227
FARP1	-0.328438	0.0230057	0.03468	0.707733	0.0124229	0.949707
CUL9	-1	0.0282306	0.0280433	0.707733	0.0195923	0.955738
AARS	-0.58884	0.115693	0.0322513	0.707733	0.0256869	0.641934
CHD4	0.0197764	0.064612	0.0342647	0.707733	0.132983	0.0545963
CHD1	-0.207151	0.0770415	0.0305209	0.707733	0.099192	0.0451062
TRIP12	-0.125728	0.158879	0.028847	0.707733	0.0954463	0.0111937
PCNX	-0.216876	0.0892511	0.0367154	0.707733	0.0355969	0.439057
GUCY1A3	-0.532883	0.0293145	0.0324604	0.707733	0.0557466	0.537507
HSPA4	-0.0451213	0.145388	0.0368361	0.707733	0.172859	0.0377355
UPF1	-1	0.0338165	0.0390907	0.707733	0.0156795	0.953325
LLGL1	-0.331441	0.0973016	0.0379545	0.707733	0.0269297	0.351289
CSGALNACT1	-1	-0.117942	0.0352605	0.707733	0.00576733	0.908418
PNPLA6	-1	-0.00263084	0.0369991	0.707733	0.0142299	0.999682
MDN1	-0.020903	0.0474914	0.0343637	0.707733	0.00410908	0.808731
GEMIN5	-0.694869	0.0163395	0.036716	0.707733	0.00499453	0.953625
DHX34	-0.291456	0.0771249	0.0410243	0.707733	0.0156365	0.949465
ALS2	-0.614007	0.0558733	0.0385063	0.707733	0.0180851	0.919943
RBM25	-0.105078	0.0222835	0.0482013	0.707733	0.05363	0.405931
NUP98	-0.161132	0.0898305	0.0361561	0.707733	0.0535077	0.0662083
DDX17	-0.102736	0.214403	0.0408916	0.707733	0.2373	0.00226196
ENPP1	-0.300586	0.213479	0.0365197	0.707733	0.0849026	0.0873326
EXPH5	-1	-0.0159937	0.0429782	0.707733	0.0137458	0.990405
RAP1GDS1	-0.281553	-0.0291577	0.0514724	0.707733	0.0334947	0.671569
ZNF292	-0.0755048	0.117092	0.0388646	0.707733	0.154172	0.0257296
WDR7	-0.116667	0.140179	0.0434396	0.707733	0.0641561	0.225801
SNW1	-1	0.0891089	0.0456119	0.707733	0.0656002	0.242743
LARS	-0.343114	0.00677679	0.0413724	0.707733	0.053878	0.484177
ABLIM1	-0.564345	-0.0842105	0.049563	0.707733	0.0468972	0.750879
DYM	-1	0.0804598	0.0456093	0.707733	0.0547037	0.353435
TNRC6A	-0.521914	0.0876466	0.0521853	0.707733	0.0520538	0.100903
SEC31A	-0.276392	0.130875	0.0542909	0.707733	0.127287	0.0935916
SETD1A	-0.561708	-0.00396432	0.0468576	0.707733	0.0143743	0.999492
MACF1	-0.162523	-0.0231246	0.0533767	0.707733	0.00634304	0.999771
TTLL5	-0.0540867	0.166338	0.0536866	0.707733	0.162466	0.0110863
PCDH1	-0.908217	-0.0019516	0.0560241	0.707733	0.00225135	0.976372
NUP214	-0.331973	0.0467813	0.0534271	0.707733	0.0218609	0.915002
SPG7	-0.954874	-0.0368497	0.0533259	0.707733	0.0150463	0.950396
USP8	-0.235583	0.113375	0.0501669	0.707733	0.06327	0.266831
ARID5B	-0.199846	0.0602365	0.054805	0.707733	0.0409193	0.461985
BRD4	-0.476179	0.0642136	0.0522928	0.707733	0.0331479	0.834571
OSBPL1A	-0.116303	0.0742768	0.0547413	0.707733	0.12583	0.132192
SENP6	-0.481022	-0.00213523	0.0611424	0.707733	0.0594954	0.68616
PDE4D	-0.010655	0.256569	0.0456727	0.707733	0.292957	0.000504183
LRP5	-0.672604	0.0170618	0.0610641	0.707733	0.00736525	0.999677
NOC3L	-0.431646	0.0460184	0.0605613	0.707733	0.0529096	0.428364
ZC3H13	0.0146795	0.10853	0.0498363	0.707733	0.698516	4.86555e-07
VPS53	-0.179482	0.175897	0.0600312	0.707733	0.140568	0.0559027
CHD9	-0.0637102	0.0939709	0.0511869	0.707733	0.204923	0.015738
ING1	-0.994317	0.0638458	0.0584971	0.707733	0.0174136	0.724149
MAP3K1	0.0677535	0.392289	0.0575699	0.707733	0.593294	3.85196e-10
FAM178A	-0.190439	0.0425611	0.0661964	0.707733	0.0363736	0.239508
TRRAP	-0.716965	-0.0445948	0.062431	0.707733	0.0178291	0.999913
INVS	-0.272646	0.087298	0.0574863	0.707733	0.0503401	0.463328
BTBD7	0.0559782	0.198328	0.0606282	0.707733	0.348594	0.00108615
FBN1	-0.156028	0.0475361	0.0552768	0.707733	0.0202836	0.587006
CDC27	0.0106242	0.347168	0.0722271	0.715651	0.807256	1.76953e-05
HTT	-0.400324	0.0504808	0.0628013	0.707733	0.00674463	0.996523
USP6NL	-0.488317	-0.0183913	0.0628883	0.707733	0.00781094	0.93844
FN1	-0.30901	0.0640842	0.0637973	0.707733	0.0192775	0.802558
ESCO1	-0.281355	0.186391	0.0670736	0.707733	0.343065	0.00508321
CXXC1	-0.0261544	0.0693722	0.0660613	0.707733	0.134517	0.142876
DIAPH1	-0.303756	0.0718675	0.0814826	0.725421	0.0507894	0.589349
CNOT1	0.00321987	0.268716	0.0682481	0.707733	0.294225	0.000148854
RPAP1	0.0513676	0.159182	0.0585557	0.707733	0.160704	0.374899
PLEKHG1	-0.304379	0.083815	0.067569	0.707733	0.0313814	0.847781
ATG2A	-0.999072	-0.0590912	0.0803575	0.725421	0.00986962	0.999995
NID2	-0.139442	0.05748	0.0692826	0.707733	0.0373221	0.624782
ZC3H18	0.0272711	0.230469	0.0665682	0.707733	0.489539	3.38407e-05
IKBKAP	-0.293245	0.0460348	0.0691361	0.707733	0.0558627	0.759388
LAMA1	-1	-0.0585571	0.0748223	0.715651	0.0282529	0.999904
ACOX3	-0.235528	0.0869417	0.0636942	0.707733	0.0594954	0.818184
TCERG1	-0.113957	0.0348416	0.0559934	0.707733	0.0263166	0.349406
RRP12	-1	-0.0149042	0.0735336	0.715651	0.0226297	0.979881
FXR2	-0.22205	0.115948	0.0752159	0.715651	0.2405	0.0626138
VPS13D	0.00902379	0.021886	0.0729406	0.715651	0.0458019	0.969204
NEDD4	-0.53779	0.0380152	0.0647752	0.707733	0.0400994	0.795513
VPRBP	-0.296671	0.103522	0.0671792	0.707733	0.0397076	0.619307
TBC1D4	-0.220361	0.0428656	0.0697597	0.707733	0.0294712	0.759088
SLIT3	-0.488917	-0.0045045	0.0753635	0.715651	0.00348977	0.989099
MYCBP2	-0.0542105	0.0266798	0.0622859	0.707733	0.045632	0.720585
ACIN1	-0.249036	0.0792373	0.0751845	0.715651	0.106936	0.160455
MAN1B1	-1	0.0972419	0.0803635	0.725421	0.0566464	0.604059
KIAA0100	-0.248109	0.0894897	0.0819488	0.725421	0.075574	0.597296
IARS	-0.247095	0.206081	0.0799833	0.725421	0.136761	0.142998
MYO1C	-1	0.0172483	0.0846716	0.725421	0.0213766	0.867947
RNF123	-0.106308	0.121534	0.0887515	0.725421	0.070575	0.579869
ELAC2	-1	0.0107807	0.0889397	0.725421	0.011142	0.93439
PITRM1	-0.593505	0.00593161	0.0842393	0.725421	0.0200869	0.991167
EPB41L2	-0.245936	0.0727561	0.0863349	0.725421	0.0816061	0.480473
PTPRK	-0.0473773	0.0844071	0.0760015	0.715982	0.0989734	0.354939
SH3BP4	-0.274453	0.0710391	0.0855553	0.725421	0.0612416	0.945892
RNF145	0.0269176	0.0755323	0.0962435	0.725421	0.333076	0.451099
UHRF1BP1L	-0.45072	0.0749529	0.086769	0.725421	0.110216	0.314234
PDCD11	-0.151452	-0.00620636	0.112523	0.742964	0.0148411	0.999429
CPE	-0.136373	0.0794981	0.074413	0.715651	0.127304	0.244783
N4BP2L2	-0.307238	0.0187305	0.0937597	0.725421	0.0840826	0.778312
FRAS1	-0.340391	0.0636595	0.0841581	0.725421	0.0615126	0.760381
ATP13A2	-0.621865	0.00606623	0.0889925	0.725421	0.0358172	0.993165
NUP205	-0.630883	0.0338266	0.091283	0.725421	0.0692042	0.686449
ZFYVE26	-0.160059	0.00636755	0.0953249	0.725421	0.0194373	0.985419
LARP1B	-0.162963	0.0707771	0.0865812	0.725421	0.0725756	0.433486
C15orf39	-0.0535714	0.0794078	0.0908494	0.725421	0.130818	0.10392
KDM4C	-0.461215	-0.0907112	0.0988256	0.725421	0.0123865	0.992191
TNS1	-1	-0.0259631	0.0963452	0.725421	0.0402841	0.999907
PXDN	-0.495967	0.0753998	0.0975071	0.725421	0.021867	0.99953
PAPD4	-0.0417434	0.311187	0.0990043	0.725421	0.321238	0.000401557
KIAA0753	-0.393622	0.00988403	0.0918003	0.725421	0.0579677	0.645444
SAFB2	-0.171032	0.111709	0.103773	0.733919	0.0698859	0.480992
CAMTA1	-0.410397	0.0329059	0.0955022	0.725421	0.00870618	0.997687
DDX60L	-0.52975	0.0858555	0.0963878	0.725421	0.00368957	0.990473
AKAP11	-0.339177	0.0794582	0.0906028	0.725421	0.0190139	0.787981
BRD8	-0.204336	0.0296026	0.0855297	0.725421	0.0362204	0.795352
EHMT1	-0.859658	-0.168005	0.0957071	0.725421	0.0056547	0.999992
MAP3K5	-0.0358265	0.0309447	0.0983811	0.725421	0.0929036	0.802755
FAM179B	0.00862635	0.0855383	0.0916439	0.725421	0.330222	0.126612
MPHOSPH8	-0.173723	0.0940008	0.106347	0.733919	0.189648	0.109811
ANKRD12	-0.0402736	0.0843645	0.112665	0.742964	0.149337	0.391109
MICAL3	-0.237189	-0.0347592	0.102979	0.733919	0.0265143	0.977955
NOP14	-0.0274207	0.0855711	0.102419	0.733919	0.223776	0.438336
NFKB2	-1	0.0188088	0.11005	0.741698	0.0388203	0.731742
LCP2	-0.250396	0.0928209	0.0941833	0.725421	0.0832563	0.413951
PAM	0	0.0662063	0.0990014	0.725421	0.182598	0.553691
TM9SF3	0.115367	0.302036	0.0915055	0.725421	0.556856	0.00522931
MANBA	-0.585926	-0.00823045	0.105985	0.733919	0.0212208	0.927099
POLG	-0.403282	0.0208261	0.115514	0.750318	0.0382078	0.955084
WDFY3	-0.0392272	0.0302007	0.115677	0.750318	0.0833674	0.779331
ABCC1	-1	-0.21176	0.110599	0.741698	0.00883812	0.999996
NUP88	-0.0237812	0.0124018	0.0895346	0.725421	0.0723332	0.835355
GAS7	-0.215635	0.0395852	0.11681	0.75355	0.119725	0.66793
CDK5RAP2	-0.156664	0.038118	0.109004	0.741698	0.063967	0.91038
CLMN	-0.126396	0.0320631	0.105541	0.733919	0.142925	0.355233
MBTPS1	-0.263636	-0.0126642	0.12055	0.767099	0.0321119	0.988655
SACS	-0.0709981	0.0790496	0.10405	0.733919	0.160978	0.233752
PKD2	0.12478	0.201286	0.124502	0.769709	0.391418	0.000908626
WDR59	-0.0250804	0.0809816	0.121495	0.767099	0.146959	0.61639
PRKCD	-1	-0.00174403	0.10622	0.733919	0.0706636	0.799989
FBXO18	-0.348047	-0.00183125	0.129716	0.776879	0.0491616	0.977687
LIG1	-0.449328	-0.0900298	0.133725	0.781931	0.0263791	0.997864
AP3B1	0.0320433	0.115607	0.112643	0.742964	0.255975	0.0490996
HSPG2	-0.0826087	0.0281638	0.120917	0.767099	0.0126027	0.999992
MAPK6	-0.0903983	0.0511569	0.127183	0.776879	0.3125	0.174075
MAML3	-1	0	0.122892	0.767751	0.05151	0.972259
BAZ1A	-0.309616	0.0848977	0.117965	0.756889	0.201857	0.107336
CHD3	0.0270052	0.0921337	0.114876	0.750318	0.168711	0.0370028
ALS2CL	-0.157038	0.0640174	0.105221	0.733919	0.132781	0.937014
PTPN23	0.0648978	0.118919	0.153616	0.811094	0.133735	0.524991
DSP	-0.0485511	0.0105386	0.122612	0.767751	0.0956237	0.959804
RUNX1	0.216495	0.486385	0.129386	0.776879	0.902448	1.17256e-05
FKBP15	-0.750039	-0.145247	0.135709	0.783029	0.0507443	0.991511
PLCB2	-0.0133235	0.0868908	0.104611	0.733919	0.157364	0.562596
SMTN	0.0851027	0.228539	0.14908	0.810075	0.437106	0.00109984
NUP93	0.0179453	0.135005	0.132374	0.77786	0.150865	0.57734
NBEAL2	-0.61186	0.0737757	0.124334	0.769709	0.0134374	0.963816
HSPH1	-0.256997	-0.0215686	0.13963	0.79302	0.0584136	0.817697
FAM193A	-0.0208614	0.199061	0.130243	0.776879	0.327627	0.00842129
CYFIP2	-0.270819	0.0576068	0.146545	0.810075	0.0280333	0.931711
CTNNA1	-0.0138045	0.184149	0.136833	0.784643	0.270489	0.00417765
SPIRE1	-0.329518	0.0756931	0.128849	0.776879	0.0273597	0.925599
EIF4A1	-0.0407459	-0.027818	0.147384	0.810075	0.0499165	0.564399
ERBB3	-0.355496	0.0669106	0.135892	0.783029	0.171089	0.364178
PHKB	-0.127744	0.0271072	0.129601	0.776879	0.0863299	0.878152
NDN	-1	0.0557579	0.107604	0.738299	0.0691812	0.994871
WDR11	-0.494165	0.00439805	0.135073	0.783029	0.0415752	0.97573
CCDC88B	-0.198064	-0.0581614	0.164593	0.811094	0.0436543	0.998613
DENND5A	0.0283556	0.189623	0.147073	0.810075	0.18154	0.338888
PPP3CA	0.0433962	0.161842	0.109922	0.741698	0.834869	0.0213966
PTPRF	-0.123506	0.00270533	0.138097	0.78808	0.0240835	0.999945
TTC37	-0.324252	0.0424093	0.131951	0.77786	0.08071	0.590024
DENND4C	-0.0368577	0.0310927	0.131138	0.77786	0.118004	0.468046
DHX30	-0.159313	0.0652051	0.154004	0.811094	0.171089	0.534474
KIAA1598	-0.125897	0.00767998	0.15126	0.811094	0.114897	0.571735
PCM1	-0.108278	0.0282135	0.126157	0.7759	0.100042	0.538767
INO80	-0.0534648	0.137737	0.149458	0.810075	0.368327	0.0579961
MYO5C	-0.0882353	0.088647	0.156202	0.811094	0.194991	0.293569
NPC1	-0.798056	0.0567061	0.143475	0.80713	0.0580279	0.838449
SERPINA3	-0.28277	-0.0752814	0.141921	0.80219	0.0119993	0.998803
ABCA2	-0.595823	-0.0483871	0.175591	0.811094	0.021867	0.999992
MAPK8IP3	-1	-0.0181245	0.149239	0.810075	0.0402841	0.999019
IQGAP2	-0.154655	0.0727071	0.148451	0.810075	0.110658	0.571805
KIAA0368	-0.241986	0.107054	0.151943	0.811094	0.137352	0.67598
NEDD4L	-0.0384573	0.190519	0.170035	0.811094	0.179211	0.186744
NFATC1	-0.995825	-0.0377179	0.152443	0.811094	0.00509194	0.999502
CHST15	-0.564307	0.187783	0.161433	0.811094	0.0993031	0.647205
SPTBN2	-0.147982	0.0270877	0.172995	0.811094	0.0701428	0.977368
DSC2	-0.0265211	0.0831494	0.144851	0.810075	0.174068	0.163303
GEMIN4	-0.934655	-0.0108902	0.168031	0.811094	0.0138239	0.994135
CIT	-0.0547235	0.0563758	0.177713	0.811094	0.220953	0.902633
RABEP1	-0.28321	0.104842	0.153483	0.811094	0.232604	0.160353
PDS5B	0.192547	0.174825	0.157713	0.811094	0.692599	0.000329789
NFIB	-0.0129601	0.156682	0.181277	0.811094	0.338427	0.0433307
NEBL	-0.112138	-0.0068203	0.176813	0.811094	0.0883278	0.991575
TBP	-1	-1	0.167675	0.811094	0.0130181	0.999062
IKZF2	0.0552151	0.191655	0.162566	0.811094	0.41918	0.085953
RERE	-0.134275	0.203748	0.178483	0.811094	0.222455	0.00278964
IRS1	-0.553394	0.125548	0.169166	0.811094	0.0906318	0.769843
PLK2	-0.00235722	0.12901	0.178338	0.811094	0.422141	0.10903
TMEM175	-0.472271	0.105181	0.201578	0.811094	0.0820104	0.978475
PKD1	-0.969925	-0.202825	0.180544	0.811094	0.00315879	1
PDZD8	-0.268235	0.0247253	0.171836	0.811094	0.0572455	0.971418
FUK	-0.819935	0.0335014	0.186582	0.811094	0.018421	0.967396
EEF2	-0.0429522	0.0765809	0.169387	0.811094	0.10027	0.960575
MEF2C	-0.311922	0.111009	0.166746	0.811094	0.0590466	0.315258
PELP1	0.042867	0.00493281	0.176803	0.811094	0.070902	0.913324
PTPRE	-0.125506	0.0631681	0.175637	0.811094	0.0578554	0.98477
TYRO3	-0.0555576	0.0425861	0.178335	0.811094	0.118257	0.888062
AQR	0.0162116	0.159556	0.188135	0.811094	0.334951	0.115873
TUBGCP2	-0.419824	-0.053701	0.200804	0.811094	0.0150252	0.998343
AKAP6	-0.389461	0.0346275	0.190329	0.811094	0.102604	0.894791
BCL9L	0.0966651	0.129828	0.175358	0.811094	0.689479	0.0250492
KARS	0.0385109	0.161262	0.204071	0.814108	0.377594	0.286481
RANBP6	0.014345	0.0412222	0.163065	0.811094	0.195441	0.730968
CBL	-0.0690608	0.0840463	0.173515	0.811094	0.0557353	0.914691
CROCC	-0.670212	0.00359396	0.187797	0.811094	0.0166068	0.999744
MSR1	-0.110857	0.0496575	0.187537	0.811094	0.0658689	0.710126
KDM6B	0.0383697	0.0575491	0.197324	0.811094	0.0970806	0.843566
ABCA7	-0.578862	0.0121457	0.188546	0.811094	0.0132895	0.999978
ABCA1	-0.0191832	0.0770094	0.19404	0.811094	0.213766	0.320951
ULK2	-0.0806633	0.151861	0.184088	0.811094	0.5	0.0209855
CMYA5	0.0608378	0.0535286	0.162674	0.811094	0.239862	0.36864
RBL2	0.142105	0.266185	0.199896	0.811094	0.990407	4.10342e-05
CNTROB	-0.226588	0.0543434	0.186267	0.811094	0.159731	0.612202
SMC3	0.0293333	0.0464701	0.194513	0.811094	0.30118	0.0652948
RUSC2	0.03937	0.0655085	0.208299	0.816428	0.114678	0.560953
UNC13B	-0.116608	0.0495616	0.195206	0.811094	0.115399	0.591275
LAMC3	-1	0.00571528	0.174725	0.811094	0.0691812	0.969072
WDR36	-0.239628	0.0283834	0.175062	0.811094	0.11712	0.716363
CTDP1	-0.341651	0.0610574	0.204701	0.814108	0.0560197	0.972662
DOCK1	-0.306441	0.000805679	0.198652	0.811094	0.0269297	0.999038
ELL2	-0.0551761	0.0673839	0.1835	0.811094	0.27497	0.167284
SMC2	0.0690751	0.111404	0.190554	0.811094	0.482262	0.0268135
DOPEY1	-0.0774366	0.0867306	0.191585	0.811094	0.271318	0.178126
TMEM2	-0.0370844	0.0384013	0.185836	0.811094	0.0779646	0.869641
FYCO1	-0.444611	0.000336022	0.186675	0.811094	0.0398715	0.998537
HR	-0.279336	-0.0777419	0.201168	0.811094	0.029199	0.984445
RANBP3	-0.679361	0.203285	0.196517	0.811094	0.130818	0.0248764
PTCH1	-0.115413	0.195161	0.207919	0.816428	0.152476	0.25558
ARAP1	-0.0150602	0.0811204	0.284113	0.832698	0.33655	0.817406
ARHGAP5	-0.226149	0.0131746	0.189418	0.811094	0.292164	0.222165
FBLN2	0.0463618	0.086697	0.18419	0.811094	0.156207	0.840314
RAD50	0.124402	0.129896	0.183104	0.811094	0.446352	0.0119487
GOLGA4	-0.0800882	0.0571318	0.187803	0.811094	0.155707	0.630123
TCF4	0.128215	0.208247	0.199144	0.811094	0.618383	0.207957
RHOT1	0.0418237	0.016129	0.22879	0.816428	0.223776	0.541281
CD109	-0.00131591	0.0718707	0.218818	0.816428	0.264876	0.879791
CUL5	-0.192762	0.166667	0.199481	0.811094	0.330917	0.0618314
SIDT2	0.110606	0.0711056	0.226234	0.816428	0.207707	0.830276
NOTCH4	-0.0842349	0.0306726	0.220994	0.816428	0.17159	0.985323
NCOA7	0.040113	0.192291	0.215281	0.816428	0.234621	0.450236
FRMD4B	-0.0950363	0.0584122	0.201303	0.811094	0.130818	0.761611
QSER1	-0.00479452	0.0840275	0.171442	0.811094	0.198792	0.307339
SYNE2	-0.0471252	0.00545703	0.19873	0.811094	0.0221913	0.999941
DNAH1	-0.144224	0.0297184	0.214328	0.816428	0.132015	0.815001
SMCHD1	0.0169036	0.0787922	0.187088	0.811094	0.444353	0.0497099
NKTR	0.0839054	0.125189	0.197804	0.811094	0.801221	0.00308812
FNIP1	0.158529	0.221008	0.205822	0.81437	0.468724	0.00900654
MAN2A1	-0.121307	0.0200318	0.19962	0.811094	0.0931187	0.858771
COL12A1	-0.00889804	0.0365646	0.183939	0.811094	0.111187	0.899108
EPHA2	0.214469	0.334581	0.209305	0.816428	0.820789	0.000851247
RNF31	-5.44987e-05	0.00420008	0.228212	0.816428	0.204698	0.740608
EXOC6	-0.0517903	0.0924335	0.221994	0.816428	0.190447	0.236607
GBF1	0.134609	0.1437	0.229743	0.816428	0.346639	0.090561
MYO18A	-0.253886	0.0147982	0.22614	0.816428	0.0772033	0.967415
PPL	-0.424305	0.0647306	0.220979	0.816428	0.0979951	0.989707
FAM13A	0.0410433	0.0359625	0.191902	0.811094	0.246226	0.910577
IFNAR1	0.0630882	0.0862909	0.19703	0.811094	0.444353	0.217741
ANK2	-0.417259	-0.0564984	0.215498	0.816428	0.0202165	0.997554
LRP6	-0.214513	0.0715667	0.232855	0.816428	0.281272	0.33716
C2CD3	0.025868	0.0638049	0.236201	0.816428	0.178606	0.949507
FRY	-0.103179	0.0425691	0.192202	0.811094	0.121679	0.713448
ADAM19	-0.0166788	0.0210262	0.203997	0.814108	0.0947838	0.868864
RALGDS	0.0578194	0.113081	0.233222	0.816428	0.44992	0.843285
MOV10	0.0228397	0.0321821	0.253057	0.816428	0.190884	0.827371
DNMBP	-0.0420105	0.129044	0.222254	0.816428	0.32119	0.161929
LMBRD1	-0.153446	0.053115	0.245191	0.816428	0.11712	0.666093
DPYD	-0.103394	0.0428157	0.21214	0.816428	0.143177	0.757827
POLK	-0.0891813	0.0433771	0.201328	0.811094	0.210352	0.338664
ZNF646	0.0305379	0.095093	0.222666	0.816428	0.264605	0.934744
RYR1	-0.110889	0.0279012	0.217776	0.816428	0.0911393	0.96563
CAMSAP1	-0.146283	0.0452937	0.21428	0.816428	0.123526	0.9475
LARP4B	0.14228	0.246596	0.222392	0.816428	0.796758	5.55846e-06
ERCC6	-0.2236	0.124752	0.231256	0.816428	0.169968	0.0987367
ZNF469	-0.204497	0.0309065	0.231082	0.816428	0.0630164	0.376214
ME2	-0.152985	0.102703	0.223076	0.816428	0.157364	0.542726
ILF3	0.026808	0.0141859	0.228642	0.816428	0.277386	0.807732
FLNB	-0.122335	0.0131883	0.225632	0.816428	0.0667986	0.980373
ALPK1	-0.0527444	0.0769772	0.209821	0.816428	0.152306	0.903244
DLG4	-0.569119	-0.0606629	0.262621	0.816428	0.0741007	0.968244
PIGO	-0.108225	0.00984173	0.268487	0.817525	0.0973299	0.819234
DNMT1	-0.0255034	0.0287008	0.239779	0.816428	0.152799	0.938792
ZNF609	0.00872419	0.107988	0.234481	0.816428	0.437493	0.0888133
RAB11FIP1	-0.21275	0.00381944	0.228582	0.816428	0.0707894	0.989444
SNX19	-0.286871	0.0582791	0.251801	0.816428	0.0437287	0.742153
ZDHHC8	0.0270975	0.123997	0.239499	0.816428	0.318285	0.239285
LRP1	-0.00591716	0.00443662	0.244158	0.816428	0.0877035	0.999978
RABGAP1	0.00131234	0.101345	0.228198	0.816428	0.306462	0.2859
ARSB	-0.370322	0.0481262	0.232167	0.816428	0.152799	0.796308
RAI1	-0.0275439	0.0892191	0.229183	0.816428	0.103457	0.896802
PHF2	0.0495631	0.10685	0.274393	0.824569	0.317972	0.577303
SETD5	0.0510288	0.0819089	0.262307	0.816428	0.518231	0.0777059
ARHGEF10	-0.375588	-0.0715421	0.227747	0.816428	0.00503911	0.999829
TBC1D9	-0.582369	0.0032077	0.241397	0.816428	0.0597411	0.992115
ZBTB40	-0.155925	0.0388723	0.244465	0.816428	0.126421	0.952294
KIF11	-0.169379	0.169485	0.215699	0.816428	0.287407	0.360796
PDGFRA	-0.148479	0.00655613	0.239119	0.816428	0.0743174	0.993613
AFF4	-0.00882872	0.0509752	0.183525	0.811094	0.389783	0.444588
MTHFD1L	0.26499	0.197917	0.216896	0.816428	0.472057	0.0462593
TACC2	0.0188745	0.00356252	0.258208	0.816428	0.0103386	0.99966
FCGBP	-0.347778	-0.0752537	0.234117	0.816428	0.0291089	1
GJA1	-0.0298628	0.102077	0.231007	0.816428	0.219946	0.547318
C2CD2L	-0.272134	-0.150493	0.254065	0.816428	0.0600709	0.990287
ITGAE	-0.0464665	0.032649	0.306047	0.842274	0.128405	0.951584
WHSC1L1	-0.126234	0.0548451	0.249557	0.816428	0.241652	0.566555
PLOD1	-0.949127	0.00236407	0.263175	0.816428	0.0589373	0.961181
AKNA	-0.118563	-0.0241779	0.247972	0.816428	0.0163936	0.999334
KIF1B	-0.181359	0.00428322	0.255289	0.816428	0.108856	0.975388
SLC12A6	0.0646889	0.104617	0.260754	0.816428	0.48259	0.3097
GTPBP1	0.0511044	0.132948	0.288599	0.83383	0.377536	0.189618
AHDC1	-0.0535599	0.0516196	0.283751	0.832698	0.201857	0.796458
HERC2	-0.0397311	0.0185621	0.237813	0.816428	0.0288947	0.999304
PTPRM	0.0236052	0.014767	0.25858	0.816428	0.145687	0.850849
WTAP	-0.0696705	0.0178571	0.245878	0.816428	0.252123	0.530697
XYLT1	-0.0218271	0.100302	0.249274	0.816428	0.161524	0.993179
AHNAK	0.00420173	-0.0418704	0.265389	0.817525	0.00367795	1
EP300	0.171047	0.206883	0.261706	0.816428	0.85683	1.68842e-07
EFTUD2	-0.0538503	0.0228075	0.267637	0.817525	0.188603	0.757296
DMXL1	-0.0140935	0.0715737	0.257284	0.816428	0.285304	0.406661
MYO6	0.111563	0.154338	0.263133	0.816428	0.660452	0.00655414
SEC24D	0.0561431	0.0879035	0.259437	0.816428	0.260706	0.244929
ABCC4	-0.028866	0.0345224	0.243197	0.816428	0.220692	0.489261
LIMCH1	0.0730482	0.0793223	0.248564	0.816428	0.277845	0.334518
RANBP2	0.0198289	0.0594572	0.268606	0.817525	0.280689	0.653501
PARD3	-0.0665201	0.0634245	0.241573	0.816428	0.249646	0.27845
MAP1A	0.0322313	0.052567	0.269953	0.819525	0.080042	0.996993
ZNF33A	-0.448978	-0.144053	0.250035	0.816428	0.101471	0.999071
PRR12	-0.0705252	0.0119425	0.261614	0.816428	0.111281	0.998412
SASH1	-0.18556	0.0534262	0.25245	0.816428	0.0738167	0.984531
GAPVD1	0.111646	0.163578	0.270677	0.819626	0.520741	0.00744596
NPR2	0.211132	0.128386	0.261066	0.816428	0.534022	0.115514
PRDM2	-0.0362069	0.0210487	0.277049	0.82473	0.120763	0.998322
SKIV2L2	0.196025	0.243813	0.252926	0.816428	0.779047	0.0557678
SMG6	0.0348658	0.0485981	0.29025	0.83383	0.13498	0.986793
PIK3R1	0.568257	0.543981	0.275736	0.82473	0.984911	1.95015e-15
REXO1	-0.77129	-0.372009	0.234621	0.816428	0.0400994	0.999947
MGAT1	0.143637	0.197828	0.25846	0.816428	0.343809	0.789594
CUL3	-0.0032591	0.176814	0.248527	0.816428	0.681152	0.00394533
IGSF3	-0.465762	-0.0295922	0.281021	0.831482	0.0768699	0.999834
A2M	-0.315145	0.0588235	0.295262	0.839312	0.142925	0.992077
SORBS1	-0.0273684	0.0156067	0.281597	0.831482	0.216192	0.737889
CHD8	0.0820189	0.139044	0.265908	0.817525	0.552138	0.00109927
SHROOM3	-0.129144	-0.00190658	0.254999	0.816428	0.071981	0.999707
ZNF91	0.00102957	0.0531519	0.262579	0.816428	0.237623	0.979654
TNKS	-0.0655045	0.0582053	0.247234	0.816428	0.268833	0.54068
TRIM5	-0.377008	0.00250871	0.292525	0.834679	0.0781686	0.927444
SLC12A2	0.0252476	0.14345	0.20507	0.814108	0.743304	0.219784
WDR47	0.175996	0.201077	0.257529	0.816428	0.718825	9.03368e-05
TPP2	-0.086412	0.00440335	0.297089	0.839563	0.171993	0.854113
BICD2	0.152235	0.120659	0.296269	0.839312	0.561154	0.470216
PHLDB1	-0.17197	0.00829974	0.307873	0.842274	0.169811	0.982441
DMXL2	0.0134786	0.0707565	0.267724	0.817525	0.257443	0.491067
KIAA0556	-0.0922136	0.0274943	0.279648	0.829856	0.156389	0.991915
PSD3	0.0509909	0.0994475	0.27155	0.820177	0.284945	0.422457
ANKS6	-0.155925	-0.216942	0.263577	0.816428	0.04072	0.992764
FUCA2	0.0942324	0.179374	0.277226	0.82473	0.795846	0.161516
ZMIZ1	-0.0613178	0.0824601	0.288512	0.83383	0.345995	0.406372
FREM2	-0.0724864	0.0239391	0.290554	0.83383	0.100269	0.872512
GLB1	-0.134601	0.0627608	0.302775	0.842274	0.169968	0.642521
ENTPD1	-0.0725436	0.0591075	0.323654	0.853891	0.152077	0.789642
CHL1	0.0465116	0.0384636	0.289074	0.83383	0.228065	0.917684
CELSR1	0.0875424	0.14755	0.235936	0.816428	0.380511	0.987924
MICAL2	0.0127121	0.118243	0.331654	0.854581	0.247191	0.656776
IDE	-0.00299581	0.0577139	0.295958	0.839312	0.216484	0.574236
EXTL3	-0.273376	-0.0654058	0.302807	0.842274	0.0525445	0.996411
PKN1	-0.422507	0.0323708	0.358636	0.864231	0.0964345	0.988071
VPS13A	0.0502121	0.0690202	0.291525	0.83383	0.471241	0.177534
RNF219	-0.00292398	0.0805544	0.287095	0.83383	0.416717	0.374061
VWF	0.0304306	0.00883685	0.356348	0.864231	0.108626	0.999922
FHDC1	-0.0739332	0.108048	0.301228	0.842274	0.20983	0.900634
EP400	-0.0433531	0.00447853	0.312472	0.842964	0.0797352	0.999996
NUP210	-0.326683	-0.0381687	0.264118	0.816428	0.0106397	0.999999
NCAPD3	-0.00299012	0.100039	0.307166	0.842274	0.428072	0.555862
IL10RA	0.0790763	-0.0586466	0.380286	0.869519	0.109381	0.956395
RCBTB2	-0.112504	-0.000228122	0.273293	0.823348	0.19778	0.561452
CDC42BPB	-0.139848	-0.0799247	0.297773	0.839563	0.0771065	0.999849
BAHD1	-0.472184	0.038288	0.306845	0.842274	0.176311	0.813282
SNAPC4	0.0238637	0.0400982	0.337687	0.854581	0.343065	0.990969
MYBBP1A	-0.00615655	0.00831579	0.306598	0.842274	0.0525532	0.991644
CYB5R4	-0.162333	0.0850249	0.320913	0.853891	0.428192	0.286914
LRRK1	-0.141028	-0.0573861	0.315017	0.847904	0.0691175	1
ATP10A	-0.295498	0.0408135	0.309806	0.842274	0.108178	0.978007
BDP1	-0.00543971	0.0202263	0.276009	0.82473	0.0637604	0.821665
COL6A1	-0.141593	-0.19732	0.306268	0.842274	0.063274	0.999997
UBR1	-0.0531496	0.0662985	0.311282	0.842274	0.274049	0.425106
MAGI1	-0.0385694	0.070566	0.291021	0.83383	0.149533	0.870424
MFHAS1	0.00154028	0.0356487	0.311507	0.842274	0.302788	0.963962
ZEB1	-0.0607966	0.00620091	0.339652	0.854581	0.149107	0.961568
CRTAC1	-0.447382	0.0621266	0.333339	0.854581	0.105477	0.671527
CCDC80	0.159074	0.080714	0.308871	0.842274	0.174068	0.716424
MAP1B	-0.162277	-0.00440302	0.286474	0.83383	0.0200025	0.999961
FRG1	0.0520833	0.0790514	0.284857	0.832822	0.376704	0.235617
STARD13	-0.603698	0.0425139	0.305417	0.842274	0.067479	0.995785
SLMAP	-0.313668	-0.0314958	0.335811	0.854581	0.160098	0.929232
KDR	-0.070023	0.0646246	0.303399	0.842274	0.218283	0.906933
TSR1	-0.136537	-0.13522	0.317894	0.85371	0.0831032	0.949902
MLH3	-0.282769	-0.0491344	0.308493	0.842274	0.0859907	0.969538
SBF1	0.0490008	0.0813407	0.330712	0.854581	0.362447	0.667759
CLASP2	0.0142248	0.199028	0.323716	0.853891	0.772164	0.0344831
WRAP53	0.00829256	0.125613	0.327642	0.854581	0.322152	0.714796
ARID4A	-0.0441767	0.050906	0.300411	0.842274	0.424804	0.115162
FAM135A	-0.0131258	0.0664629	0.31873	0.853891	0.318285	0.586442
ARAP3	0.0326271	0.136833	0.347933	0.862387	0.615823	0.300549
TNC	-0.140627	0.00774136	0.323503	0.853891	0.0134811	0.999804
SEC23IP	0.0942454	0.0420238	0.322684	0.853891	0.296353	0.528061
GPHN	0.2827	0.108376	0.330082	0.854581	0.362576	0.106804
CEP164	-0.119326	-0.105719	0.389615	0.870627	0.218691	0.99914
ERBB2	0.00507246	0.0280677	0.310885	0.842274	0.200118	0.983645
TP53BP1	0.0358423	0.0973654	0.338563	0.854581	0.5	0.166393
DOCK6	-0.328561	0.0204391	0.325847	0.854581	0.125486	0.987911
SLC12A4	-0.323606	-0.0685565	0.339816	0.854581	0.10027	0.998691
GCN1L1	-0.0070879	0.0458209	0.326296	0.854581	0.250797	0.966967
PLA2G4F	-0.551195	-0.119127	0.339219	0.854581	0.031596	0.977181
TLE1	0.0141051	0.101073	0.344444	0.862387	0.411878	0.348359
SATB1	-0.0954336	-0.03357	0.320182	0.853891	0.0518645	0.947923
NOTCH1	0.181752	0.247494	0.334703	0.854581	0.532926	0.047395
GTF3C1	0.0565832	0.0829797	0.33743	0.854581	0.224508	0.660473
PLEKHG3	0.107207	0.0484096	0.357906	0.864231	0.204154	0.992877
TMF1	-0.0083087	0.0405738	0.326445	0.854581	0.347202	0.64831
CSF1R	0.0989582	-0.0118897	0.389363	0.870627	0.0872526	0.975081
SRCAP	-0.180786	0.0332379	0.337591	0.854581	0.204151	0.995471
NOL8	0.112898	0.0506436	0.34166	0.8574	0.311819	0.897775
ANO10	0.0879754	0.216732	0.332995	0.854581	0.787203	0.0210805
ERAP2	-0.45002	0.0204513	0.327976	0.854581	0.101471	0.918538
DVL2	-0.0268436	0.159037	0.380908	0.869519	0.141125	0.361797
UBE4A	-0.0167641	0.178939	0.368103	0.864231	0.435008	0.149676
WDR81	-0.0837994	0.111504	0.351326	0.863403	0.221432	0.731735
FNDC3A	0.00395901	-0.0171674	0.350251	0.863403	0.274121	0.883612
GLG1	0.113411	0.121412	0.363733	0.864231	0.435525	0.315183
AKAP13	0.0558812	0.0422976	0.34786	0.862387	0.414836	0.766931
USP48	-0.0593413	0.0244108	0.353455	0.864231	0.283341	0.782299
PIGG	-0.119609	0.0552237	0.361444	0.864231	0.0832161	0.98585
IPO7	-0.0591826	0.00337976	0.332201	0.854581	0.258883	0.746466
MYH14	0.0920221	0.0488586	0.347206	0.862387	0.264432	0.991918
DAAM1	0.0173669	0.0617726	0.386676	0.870627	0.539062	0.509034
MRVI1	0.0627086	0.17769	0.350029	0.863403	0.653117	0.276311
TLR2	0.004722	0.0883225	0.339678	0.854581	0.228554	0.419893
CAMTA2	0.0758983	0.130996	0.36349	0.864231	0.700609	0.0649041
TP53	0.371179	0.373673	0.353829	0.864231	1	2.85963e-90
COL5A3	-0.0403936	0.0219359	0.398247	0.879097	0.207636	0.998932
PDCD4	-0.114332	-0.0501186	0.283554	0.832698	0.222636	0.829576
PHF3	0.0401951	0.0397984	0.367826	0.864231	0.17415	0.83991
TTC17	0.0661318	0.0390351	0.363793	0.864231	0.438258	0.723861
CDCA2	-0.0709067	-0.0576299	0.370312	0.864231	0.111919	0.92941
SMARCAL1	0.107573	0.0310714	0.37108	0.864231	0.199036	0.702252
ENTPD4	-0.850618	-0.100906	0.37334	0.864231	0.0492191	0.979254
DCHS1	0.0420792	0.0651061	0.364093	0.864231	0.0575152	0.995382
INTS6	0.13524	0.139691	0.363076	0.864231	0.604492	0.350243
TRERF1	0.0742891	0.112386	0.359791	0.864231	0.417358	0.0365336
INPP5F	0.0635838	0.113388	0.379144	0.869519	0.545541	0.182049
COL17A1	0.0123789	-0.107268	0.35112	0.863403	0.147088	0.999101
TNKS1BP1	0.0749037	-0.0145673	0.37251	0.864231	0.223776	0.997254
PHRF1	-0.200445	-0.0372439	0.354471	0.864231	0.0413636	0.999986
NYNRIN	0.0326442	-0.0156766	0.413664	0.884018	0.195373	0.999826
KIAA1109	-0.0205069	0.0241592	0.366676	0.864231	0.287798	0.748371
DNM2	-0.200248	0.0302955	0.381716	0.869668	0.162453	0.969794
WWC1	0.0861514	0.102508	0.384163	0.870627	0.547318	0.618015
KIAA0232	-0.087416	0.0750507	0.371378	0.864231	0.376511	0.549357
DLG5	-0.139092	0.0666279	0.412161	0.884018	0.0911368	0.995707
FRMD4A	0.128425	0.194294	0.364022	0.864231	0.870013	0.0651968
AASDH	-0.327637	0.139351	0.373505	0.864231	0.397116	0.411522
PLEKHG4	0.0130835	0.0364104	0.399186	0.879097	0.429084	0.860095
DOCK8	0.055171	0.0834273	0.398685	0.879097	0.12855	0.785089
PABPC3	0.0746804	0.0724388	0.365756	0.864231	0.395912	0.23776
ATM	0.211444	0.251101	0.380918	0.869519	0.995476	2.50879e-12
PTPN13	-0.140413	-0.000634018	0.384032	0.870627	0.106401	0.965948
DSE	-0.0510733	0.0425613	0.388227	0.870627	0.174679	0.909171
ARHGAP21	0.0620825	0.128469	0.362918	0.864231	0.615077	0.362425
RBMXL1	-0.0669046	-0.00410678	0.422301	0.884018	0.40277	0.598753
THBS2	-0.126338	-0.0200733	0.335715	0.854581	0.0209368	0.999961
IL16	-0.178128	0.0158382	0.379197	0.869519	0.109381	0.99848
MAP2K3	0.00982533	0.0202059	0.436046	0.893932	0.160704	0.9758
ATP9B	0.113747	0.11583	0.380862	0.869519	0.644131	0.412567
KIAA0020	0.158141	0.106748	0.398352	0.879097	0.5	0.406201
DALRD3	-0.0655692	0.0901709	0.36916	0.864231	0.303671	0.58674
WRN	-0.0166059	-0.000621423	0.348006	0.862387	0.114996	0.951678
ANKRD50	-0.0383117	0.0342332	0.367832	0.864231	0.461195	0.410218
KIF2A	0.0140976	0.0345612	0.321524	0.853891	0.661377	0.0405914
DYNC2H1	-0.0992861	0.0663308	0.370838	0.864231	0.381438	0.39077
ABL1	-0.305357	-0.0742836	0.392689	0.874525	0.136761	0.998779
HIVEP2	-0.00416257	0.0148712	0.360933	0.864231	0.0385334	0.994914
ZFHX3	0.022418	0.0405722	0.388786	0.870627	0.118236	0.968371
LONP2	0.148959	0.194897	0.406317	0.88282	0.902317	0.123992
NOL6	0.0184056	0.0329835	0.477699	0.916764	0.198721	0.849586
PIK3AP1	-0.104466	-0.00553503	0.413683	0.884018	0.0928036	0.961595
HJURP	-0.0025288	0.0630969	0.395162	0.878383	0.323124	0.772862
MDC1	0.0249716	0.0107745	0.400654	0.880395	0.391006	0.994221
INF2	-0.0482889	0.0433884	0.422359	0.884018	0.244713	0.723475
KIFC3	0.108347	0.0603517	0.487092	0.916764	0.718438	0.411725
EPB41L4B	-0.0403281	0.0869212	0.410638	0.884018	0.622406	0.390835
HDLBP	0.10219	0.0996536	0.431674	0.889587	0.687668	0.189424
CCNL2	0.140645	0.104435	0.405678	0.88282	0.547198	0.59547
NNMT	0.100514	-0.121505	0.5	0.920155	0.152077	0.953083
HIPK3	-0.171925	0.0111895	0.405658	0.88282	0.33976	0.931544
GUF1	0.0643629	0.124838	0.414822	0.884018	0.535599	0.262445
BIRC6	0.0379832	0.107852	0.457478	0.909593	0.68866	0.00741356
OXSR1	0.20904	0.1525	0.418159	0.884018	0.553153	0.316892
SYNE1	0.0102515	0.0116585	0.39661	0.879097	0.00429759	0.999999
MYO1F	-0.19016	0.0541681	0.385222	0.870627	0.200551	0.999336
UGGT2	0.196049	0.118728	0.415363	0.884018	0.506086	0.0835352
RAPGEF2	0.0438141	0.148653	0.417616	0.884018	0.749409	0.0208964
ZNF407	-0.0180258	0.00202566	0.419808	0.884018	0.0571376	0.9983
XAF1	-0.345737	-0.240339	0.423077	0.884018	0.0411655	0.97526
RC3H2	0.173034	0.108245	0.385971	0.870627	0.672559	0.023507
NFAT5	-0.00690021	0.0260426	0.401258	0.880395	0.293226	0.726092
FANCI	0.0828685	-0.0760109	0.415715	0.884018	0.287467	0.986806
SKI	-0.975728	-0.890385	0.42505	0.884018	0.0395653	0.999853
NEO1	0.0807167	0.103537	0.421601	0.884018	0.40077	0.5649
RNF43	0.716111	1	0.425385	0.884018	0.996973	3.13915e-15
TSHZ1	-0.680122	-0.663541	0.419329	0.884018	0.0183216	1
BCLAF1	0.000623701	-0.0176248	0.369291	0.864231	0.11663	0.979671
COL11A1	0.0018545	0.0459002	0.415904	0.884018	0.52256	0.193634
HSPA8	-0.0812808	-0.0793103	0.38025	0.869519	0.200118	0.980063
STC1	0.0671587	0.0624827	0.404264	0.88282	0.233235	0.932607
MAP2K7	0.259097	0.129403	0.426563	0.884018	0.417358	0.180587
MATR3	0.0303541	0.00885329	0.438162	0.894946	0.588122	0.284797
TEP1	0.054413	0.0569714	0.424267	0.884018	0.437038	0.942311
SH3RF1	0.0522745	0.0864353	0.406826	0.88282	0.228039	0.826857
ELP2	-0.288811	0.0501674	0.421143	0.884018	0.169972	0.832371
C10orf2	0.220995	0.123976	0.540422	0.928621	0.853601	0.681749
TNK1	-0.0859133	-0.209779	0.443863	0.894946	0.150865	0.964574
PDE4A	-0.1509	0.0383906	0.389182	0.870627	0.237191	0.979053
SLFN11	-0.605597	0.0177961	0.420855	0.884018	0.1227	0.99314
HYOU1	-0.0677618	0.15144	0.47652	0.916764	0.37777	0.612267
TCF12	0.274169	0.294404	0.415809	0.884018	0.978309	4.433e-05
PDGFRB	0.0452576	-0.0256089	0.441613	0.894946	0.17233	0.999783
AKAP12	-0.160084	-0.0710784	0.433177	0.889587	0.0744882	0.999586
COL5A1	-0.00718194	0.00955657	0.346343	0.862387	0.00617668	0.999892
SMYD4	0.102633	-0.182819	0.404774	0.88282	0.258321	0.990306
LMO7	0.141874	0.100157	0.441338	0.894946	0.289802	0.3973
ATG2B	0.177453	0.0663915	0.470528	0.916764	0.351354	0.369018
PER3	0.0537759	0.0643988	0.449703	0.901684	0.443144	0.728658
PDPR	0.157214	0.0898068	0.45482	0.905825	0.517738	0.631239
NFKB1	0.0109375	-0.00212014	0.442329	0.894946	0.240977	0.894459
GOLGA3	0.030725	0.0105863	0.4591	0.909736	0.25237	0.98609
METTL3	0.256308	0.315225	0.432574	0.889587	0.922993	0.0106733
NCKAP1L	0.1077	0.0788077	0.484896	0.916764	0.540699	0.958013
IFNGR1	0.100885	0.055092	0.426741	0.884018	0.664169	0.0780624
MEX3C	0.154527	0.17631	0.440423	0.894946	0.365323	0.536528
STK11IP	-0.178598	0.024219	0.44408	0.894946	0.0840826	0.990723
THBS1	-0.00890008	0.0486479	0.423209	0.884018	0.332422	0.954554
HECTD1	-0.185725	-0.112878	0.432323	0.889587	0.307585	0.989418
SECISBP2	-0.132694	0.0224525	0.494398	0.918117	0.232422	0.870585
PLAA	-0.281107	-0.159976	0.428373	0.885851	0.12583	0.989949
HDAC4	0.0432499	0.0208012	0.483435	0.916764	0.344633	0.981466
SPRED1	-0.0188434	0.109203	0.472592	0.916764	0.666716	0.171039
ZNF462	0.0492505	0.0365058	0.5	0.920155	0.353667	0.974056
RAP1GAP	-0.413016	0.0301548	0.467796	0.91487	0.122457	0.983291
CDKN2A	0.543963	0.435241	0.520391	0.920973	1	1.83895e-07
FAM160A2	0.14884	0.0743893	0.497345	0.918117	0.302141	0.553534
DNAH2	-0.0540823	-0.109353	0.466672	0.91487	0.237191	0.891215
DDHD1	-0.077441	0.0444436	0.459646	0.909736	0.391786	0.604556
AHNAK2	0.00664419	-0.0721103	0.419838	0.884018	0.000914697	1
SBF2	0.134481	0.0917431	0.462246	0.911963	0.543304	0.341503
EGR1	0.103593	0.0948407	0.444032	0.894946	0.866917	0.336287
DLC1	-0.031463	0.0205203	0.444939	0.895157	0.0596645	0.982363
LRCH1	0.177677	0.078375	0.441189	0.894946	0.517764	0.713694
ITSN1	0.0824291	0.0410273	0.480437	0.916764	0.647481	0.628036
PAPLN	-0.101695	-0.0677403	0.447151	0.898084	0.152799	0.999693
MLPH	-0.434455	-0.230752	0.491206	0.916764	0.0496649	0.992286
JMY	0.210264	0.0709962	0.451347	0.902955	0.452806	0.305502
USP20	-0.244565	-0.0820749	0.472884	0.916764	0.108389	0.999017
ZNF532	-0.131051	-0.0672154	0.490127	0.916764	0.0618183	0.999957
NLRP1	-0.107625	0.0220419	0.454143	0.905825	0.252092	0.86883
ADCY7	-0.155753	0.0379544	0.488935	0.916764	0.226314	0.993856
GAK	0.0694395	0.0915684	0.480593	0.916764	0.572228	0.633711
THOP1	-0.0307394	-0.00323908	0.465557	0.91487	0.128065	0.985838
NFATC3	-0.0169907	0.0319026	0.451858	0.902955	0.332827	0.771368
UBR4	0.156137	0.0365464	0.488332	0.916764	0.299889	0.981053
FLT1	0.0358318	0.0123502	0.47418	0.916764	0.0786242	0.998419
PTGFRN	-0.146595	0.0569806	0.472049	0.916764	0.303671	0.92562
DIP2A	0.0482931	0.0735415	0.46784	0.91487	0.313869	0.984954
UACA	0.0693269	0.0537222	0.444034	0.894946	0.435482	0.426579
CELSR2	-0.139089	0.0277469	0.490971	0.916764	0.0425532	0.999929
DST	0.0256205	0.0164112	0.462512	0.911963	0.372307	0.968432
MUC16	0.0189235	0.0195674	0.497213	0.918117	0.119845	0.999997
PCDH18	0.0531994	0.0217554	0.513755	0.920881	0.550781	0.989063
SH3PXD2A	0.0383763	0.0891012	0.478741	0.916764	0.462163	0.77301
BBS7	-0.0255665	0.0578303	0.474801	0.916764	0.454689	0.666955
MAP4	-0.0399687	-0.0321772	0.496234	0.918117	0.226847	0.987124
ITPRIP	-0.860609	-0.253033	0.493363	0.918117	0.0582898	0.999699
DHX37	-0.0235808	-0.00599829	0.532108	0.927001	0.222636	0.997295
BRWD1	0.0892876	0.0596053	0.483945	0.916764	0.605183	0.289894
CUX1	0.175955	0.0737674	0.486361	0.916764	0.343809	0.811572
TGIF1	0.699002	0.338184	0.5036	0.920881	0.982191	6.02655e-05
ZCCHC11	0.126644	0.0663644	0.501815	0.920881	0.817402	0.442076
TLE4	-0.103674	-0.028388	0.473798	0.916764	0.180884	0.938594
ARHGEF17	-0.14287	-0.00071582	0.526069	0.92237	0.264347	0.99726
NPEPPS	0.148977	0.234079	0.516501	0.920881	0.947266	0.00452153
ZNF644	0.0250091	0.0028996	0.45985	0.909736	0.350098	0.952438
SPEN	0.0411675	0.087337	0.523964	0.92237	0.559046	0.839634
SMARCC2	0.148166	0.151552	0.52593	0.92237	0.728057	0.0104032
LIG3	0.155679	0.225968	0.510516	0.920881	0.62276	0.186102
TSC22D1	-0.252341	-0.0393282	0.466891	0.91487	0.0644531	0.991332
MCM3AP	0.0763149	0.0162237	0.511095	0.920881	0.278653	0.988437
PLXNB1	0.00341686	0.0223516	0.48858	0.916764	0.159127	0.992344
TRPM7	0.00803043	0.00167294	0.502565	0.920881	0.5	0.651965
ZNF33B	0.056982	0.00444403	0.494478	0.918117	0.583132	0.975516
CCDC88C	-0.41587	-0.110619	0.519526	0.920973	0.139575	0.999956
RRP9	0.0779423	0.0237067	0.513387	0.920881	0.411182	0.886555
ZZEF1	-0.0505479	-0.0622356	0.506549	0.920881	0.110896	0.999651
TMEM181	0.0721201	-0.238368	0.525718	0.92237	0.204154	0.996292
ZNF445	-0.0236602	-0.018018	0.478464	0.916764	0.112201	0.995299
MAP3K4	0.24812	0.198172	0.485967	0.916764	0.849587	0.0222464
LPIN2	0.138001	0.15316	0.495061	0.918117	0.410514	0.528312
PPIL4	0.0425084	-0.0606154	0.513169	0.920881	0.446423	0.700655
NFX1	-0.0790051	-0.0653984	0.510503	0.920881	0.37653	0.818889
COL3A1	0.112664	0.0235566	0.540424	0.928621	0.462175	0.666598
PCNT	-0.121344	-0.231018	0.505463	0.920881	0.0100537	1
MPRIP	0.0926871	0.0968553	0.517096	0.920881	0.42402	0.673773
WAPAL	0.0962525	0.0708567	0.525871	0.92237	0.567661	0.429186
TAF1C	0.0089852	0.0315747	0.520618	0.920973	0.361961	0.933218
PDIA3	-0.0809179	-0.0211223	0.482995	0.916764	0.343065	0.790753
SVEP1	-0.0217087	0.00972006	0.477004	0.916764	0.185963	0.995291
CDAN1	-0.0192691	0.0493783	0.509567	0.920881	0.411182	0.726294
TBC1D1	0.171325	-0.0481928	0.541439	0.928741	0.272017	0.99884
KAT2B	0.16269	0.114743	0.490797	0.916764	0.41466	0.429134
FAM160B2	0.127581	-0.109973	0.479214	0.916764	0.387837	0.964958
SH3PXD2B	0.137408	0.0508494	0.505475	0.920881	0.210647	0.929627
ARHGAP32	-0.218887	-0.0197019	0.51076	0.920881	0.120188	0.998559
MAP2	0.0996241	0.00972326	0.531178	0.927001	0.344469	0.997504
WDR19	-0.0909091	-0.0962025	0.517934	0.920881	0.199036	0.986142
MMP2	0.0305998	-0.209148	0.524245	0.92237	0.158174	0.99999
ZNF518B	-0.0398857	0.0128018	0.533275	0.927001	0.221149	0.949491
SYNJ1	0.0155417	-0.0840961	0.515484	0.920881	0.415539	0.931674
TBC1D2	0.0902064	0.0173695	0.685021	0.978483	0.337306	0.983605
INSR	0.0624331	0.0318352	0.534959	0.927001	0.160277	0.99767
KIF1C	-0.011674	0.0449951	0.555831	0.946069	0.403846	0.850758
SMAD2	0.27344	0.279497	0.533704	0.927001	0.955751	0.00831953
UTP20	-0.0120168	0.0642791	0.559727	0.946434	0.300192	0.866873
DOCK2	0.0229851	0.0672069	0.527353	0.923257	0.243715	0.989412
IGF2R	0.0982702	0.0851008	0.512922	0.920881	0.405398	0.962458
GAS6	0.0891652	0.0766501	0.536501	0.928319	0.457147	0.920005
SORBS3	-0.237427	0.022408	0.538148	0.928462	0.313248	0.908945
TULP4	0.150103	0.055102	0.556323	0.946069	0.4389	0.845051
TCF7L2	0.22527	0.204528	0.546964	0.934718	0.964178	0.16205
CTNNB1	0.111489	0.0756234	0.57128	0.952068	0.856924	0.0609597
BMP1	0.0161053	-0.0176317	0.568583	0.950574	0.381984	0.914156
MAML1	-0.11454	-0.0944239	0.534381	0.927001	0.292878	0.994808
SON	-0.0555127	-0.0246723	0.517506	0.920881	0.035418	0.999991
FANCA	0.0354683	0.0660763	0.516568	0.920881	0.288574	0.857697
SGSM2	-0.0520974	-0.100195	0.540587	0.928621	0.14237	0.994689
AMPD3	0.311936	-0.0778372	0.561615	0.948275	0.459301	0.645483
EPB41L3	0.132309	0.110989	0.537702	0.928462	0.390841	0.458208
FYN	0.264981	0.111564	0.566011	0.948948	0.712182	0.23012
COL18A1	0.0268817	0.0211575	0.530241	0.926946	0.368764	0.937649
CHD6	0.0297486	0.129074	0.563838	0.948948	0.453129	0.775752
CDON	0.168316	0.168653	0.571704	0.952068	0.695284	0.393887
ZNF142	0.108804	0.0955197	0.576039	0.952068	0.759996	0.689348
AFAP1L2	0.0433973	-0.000738304	0.603542	0.955322	0.269676	0.947923
COL6A3	0.0654643	0.0114821	0.563208	0.948948	0.0206134	1
MIIP	-0.0125231	-0.106881	0.558437	0.946434	0.182567	0.991533
L3MBTL2	0.0839902	0.0110064	0.547286	0.934718	0.45938	0.901449
SETX	-0.0153022	0.0203644	0.553945	0.944731	0.314558	0.989416
AGRN	0.0867981	0.068734	0.565394	0.948948	0.404697	0.95146
NIN	0.0243994	0.0117474	0.567962	0.950574	0.246179	0.989039
FCHSD1	-0.114208	0.0422642	0.61846	0.95662	0.446847	0.772867
UBA6	0.0105519	-0.0533155	0.577787	0.952068	0.464559	0.912226
ZNF721	-0.292476	-0.214829	0.517645	0.920881	0.0476887	0.999999
HDAC10	0.0211468	-0.0408149	0.677015	0.97618	0.189501	0.950762
KIAA1462	-0.0301083	0.0144272	0.581968	0.952068	0.123532	0.998622
ODF2	-0.0201638	0.0464153	0.558741	0.946434	0.389254	0.565569
PHF10	0.263028	0.108134	0.565358	0.948948	0.548418	0.185396
TBCK	-0.151584	-0.0552616	0.580963	0.952068	0.671758	0.7976
USP10	-0.109385	-0.19241	0.587381	0.95221	0.22498	0.999444
BTRC	0.194533	0.138481	0.583162	0.952068	0.739294	0.0347066
USP24	-0.129802	0.0593792	0.577819	0.952068	0.583132	0.319933
KIF15	0.0213366	0.000583647	0.588748	0.95221	0.5	0.77504
RIN3	0.0113756	-0.296966	0.573406	0.952068	0.275371	0.999988
RPS6KA2	0.00110462	0.0121669	0.64261	0.969476	0.306825	0.997582
DHX29	-0.0541045	0.0820595	0.547184	0.934718	0.571808	0.242752
TMX3	0.0711893	0.0516078	0.577272	0.952068	0.738901	0.603709
LONP1	-0.00899222	0.0879596	0.581547	0.952068	0.406619	0.681826
ABR	0.1668	0.0214828	0.572226	0.952068	0.32658	0.885049
ADAM12	-0.243419	-0.203753	0.581508	0.952068	0.0937684	0.99818
WNK1	-0.0218772	-0.0360153	0.584716	0.952068	0.33655	0.999591
MED16	0.120411	0.0867966	0.606362	0.955322	0.556911	0.924128
PRKCH	0.316928	0.171391	0.6017	0.955322	0.853041	0.231873
SIPA1L1	0.0787001	0.0198753	0.588814	0.95221	0.203848	0.914403
ACO1	0.0732038	0.129061	0.606124	0.955322	0.854335	0.378293
SLK	0.171951	0.131714	0.626181	0.960236	0.855596	0.234035
MAGI3	0.129045	0.0840431	0.593818	0.955322	0.528599	0.436795
MUC5B	0.00526389	0.00076773	0.605619	0.955322	0.164222	0.999999
RFX7	0.0304606	-0.0334755	0.607392	0.955322	0.265225	0.98937
TET2	0.16046	0.0605564	0.580202	0.952068	0.77493	0.200332
ARHGEF10L	0.209936	0.142962	0.580821	0.952068	0.44408	0.471789
RGS12	0.0904897	0.080938	0.604993	0.955322	0.77575	0.536419
COL4A1	0.0413519	0.0260804	0.390205	0.870627	0.158195	0.999627
PIBF1	0.104584	0.155332	0.559449	0.946434	0.845292	0.0305718
CDH5	-0.0230048	0.00337618	0.604024	0.955322	0.234184	0.997783
PITPNM2	0.138277	0.0867862	0.609249	0.955322	0.236322	0.993045
SH2D3C	0.103256	0.0327784	0.636734	0.968979	0.359763	0.946651
VAV2	0.103738	0.0806505	0.584056	0.952068	0.544723	0.83811
ATP2A3	-0.102789	-0.0507834	0.58841	0.95221	0.0824742	0.999781
SP100	0.0601329	0.039109	0.619127	0.95662	0.541872	0.957368
HEATR5A	0.035764	0.110409	0.58869	0.95221	0.652522	0.330986
RNF111	0.121212	0.0858586	0.518238	0.920881	0.922246	0.0249656
RBM26	0.0519295	0.0333492	0.584683	0.952068	0.612008	0.509338
ANK3	0.019745	0.0579985	0.57923	0.952068	0.609816	0.749164
TCF20	0.0932563	0.0721925	0.594122	0.955322	0.594483	0.284162
NPHP4	-0.0913297	-0.247049	0.629564	0.961766	0.115786	1
FBLN1	0.0904103	0.0645939	0.595279	0.955322	0.43763	0.59052
BPTF	0.10812	0.0223857	0.634099	0.966208	0.357422	0.984218
FNBP4	0.197339	0.0143796	0.598499	0.955322	0.481069	0.774878
FOXRED2	0.14835	0.147421	0.62063	0.95662	0.733254	0.274518
ITGAX	0.00994172	0.0203659	0.633706	0.966208	0.5	0.999837
SEC16A	0.0628123	-0.0133333	0.591452	0.955174	0.129737	0.999651
CELSR3	0.0915332	0.0689054	0.618885	0.95662	0.420899	0.568952
ITPR2	0.2324	0.0912576	0.61212	0.95662	0.760138	0.162945
ARAP2	0.107713	0.0548944	0.62136	0.95662	0.598037	0.963805
USP19	-0.030719	-0.0696217	0.623686	0.958957	0.279786	0.999405
ERBB2IP	0.0724763	0.0884184	0.606873	0.955322	0.642789	0.50545
VLDLR	-0.0338892	-0.0331833	0.608334	0.955322	0.464401	0.698572
TYK2	-0.0350427	0.00759855	0.603633	0.955322	0.348807	0.998378
PLEKHA7	0.126469	0.032635	0.617401	0.95662	0.5	0.784023
EIF3A	0.0323741	0.00728745	0.659524	0.969476	0.44519	0.930404
DSEL	0.117027	0.104452	0.626426	0.960236	0.873339	0.175499
BTAF1	0.0276631	0.016073	0.620769	0.95662	0.668146	0.604974
MYO9B	0.165125	0.0716505	0.618621	0.95662	0.403438	0.985582
ZC3H7B	0.0543127	0.0319501	0.608588	0.955322	0.379963	0.985398
PCDH7	0.0741509	0.0904315	0.595535	0.955322	0.6651	0.716557
ATXN7	-0.0269871	0.0919847	0.612285	0.95662	0.515765	0.730958
TOP2B	0.191829	0.135159	0.616514	0.95662	0.762025	0.108886
PLCE1	0.0199938	0.0266932	0.6509	0.969476	0.467476	0.963926
ATF7IP	0.348381	0.177458	0.640305	0.969476	0.923747	0.000284488
OBSCN	0.0501345	0.00219539	0.626944	0.960236	0.200253	1
SGK223	0.104538	0.044517	0.605001	0.955322	0.291254	0.986983
MICAL1	0.0683129	-0.0551508	0.664581	0.969476	0.428072	0.982619
PCSK7	0.055048	0.0109569	0.628411	0.961242	0.391006	0.96449
HERC1	0.0579164	0.118972	0.647385	0.969476	0.919073	0.0126599
IMPDH2	0.0407925	-0.0774241	0.645299	0.969476	0.270277	0.978501
FLCN	0.232586	0.163754	0.618148	0.95662	0.692563	0.12289
HSP90AA1	0.0831224	0.0684211	0.60667	0.955322	0.836357	0.177996
DAB2IP	0.101466	0.0800129	0.684791	0.978483	0.481678	0.993419
DYRK1A	0.261261	0.129444	0.640364	0.969476	0.80202	0.00834854
TRAPPC10	-0.220069	-0.036191	0.618686	0.95662	0.220692	0.997857
FOXP1	0.225204	0.227926	0.607418	0.955322	0.732957	0.222046
PFAS	0.114737	0.0513109	0.643299	0.969476	0.440595	0.871752
NT5E	0.00714473	-0.0707581	0.618926	0.95662	0.227716	0.993642
SCAP	0.11935	0.127485	0.663383	0.969476	0.565845	0.766311
FAM120B	0.0655227	-0.0877216	0.66591	0.969476	0.410514	0.999064
RAPGEF1	0.0198276	0.00128041	0.665645	0.969476	0.37653	0.99094
MANEA	-0.0265665	-0.0630873	0.598581	0.955322	0.395508	0.955907
AP4E1	0.220377	0.0243993	0.651008	0.969476	0.429084	0.763247
NFRKB	0.0796805	-0.045955	0.654303	0.969476	0.397405	0.988995
WFS1	-0.00786678	0.0137429	0.654387	0.969476	0.145714	0.999963
ADD1	-0.177585	0.110436	0.65039	0.969476	0.405718	0.889965
COG4	0.352227	0.0770095	0.65479	0.969476	0.687915	0.729111
CLU	0.0408942	-0.0371431	0.650448	0.969476	0.295339	0.986824
ACTA2	0.0787437	0.0439219	0.669292	0.971209	0.757946	0.217578
ARIH2	0.208368	0.00735624	0.653352	0.969476	0.695316	0.754293
USP4	0.0502373	0.00335332	0.659195	0.969476	0.623786	0.981773
CEP192	0.127093	-0.00104378	0.658646	0.969476	0.522336	0.990162
NLRX1	0.13906	0.0626566	0.774043	0.996976	0.84305	0.946016
RBM5	0.0854225	0.0764625	0.68053	0.97618	0.826632	0.0984224
NUP160	-0.0445748	0.0266781	0.665413	0.969476	0.817383	0.735217
USP28	0.241052	0.237217	0.64742	0.969476	0.954392	3.08501e-05
UTRN	-0.0678295	-0.00137587	0.650603	0.969476	0.209721	0.996534
DSG2	0.0240846	-0.107213	0.681763	0.97618	0.379579	0.999005
SRRM2	0.0210246	-0.0815448	0.666464	0.969476	0.427454	1
XPO7	0.0112348	-0.0659426	0.674137	0.974666	0.22259	0.957742
BMS1	0.126039	0.0313414	0.693762	0.983865	0.485097	0.804563
NOTCH3	0.153357	0.114197	0.666426	0.969476	0.58849	0.420538
MYO9A	0.0644689	0.075719	0.670175	0.971304	0.892737	0.649718
FBXW7	0.399765	0.414772	0.672637	0.973683	0.999929	2.07638e-15
FRYL	0.081652	0.0759165	0.638428	0.969476	0.677924	0.202205
SMCR8	0.0610913	0.103947	0.662276	0.969476	0.525152	0.969076
NOTCH2	0.250654	0.261745	0.66865	0.971209	0.889103	0.000100174
TIAM1	0.072332	0.0127745	0.660912	0.969476	0.355727	0.986219
MTUS1	0.0706681	0.024407	0.659584	0.969476	0.639221	0.779732
CD248	0.00770053	0.0444868	0.658436	0.969476	0.263594	0.965847
THRAP3	0.236161	0.0960591	0.65834	0.969476	0.858251	0.0215419
ARHGAP29	0.235341	0.0872954	0.681153	0.97618	0.623105	0.222416
LCP1	0.315911	0.0963654	0.686876	0.978778	0.714006	0.501058
STAB1	0.0473815	0.00393842	0.662375	0.969476	0.300241	0.998958
ZNF236	0.0720029	0.066886	0.675271	0.975118	0.928857	0.538687
PDGFC	0.096871	0.0912348	0.648473	0.969476	0.553577	0.773095
FRMD6	0.189423	0.0670803	0.696826	0.985481	0.720295	0.242427
SMARCA2	0.142468	0.0552561	0.658595	0.969476	0.953038	0.553816
TBC1D9B	0.0764613	-0.129271	0.734108	0.996976	0.307441	0.997962
ZCCHC6	0.0625489	0.0260351	0.686825	0.978778	0.637018	0.828582
MAN2B2	0.141326	-0.104624	0.751949	0.996976	0.491965	0.999875
FLII	0.175	0.045294	0.72342	0.99574	0.317496	0.93236
MADD	-0.0137384	-0.0237236	0.706387	0.991113	0.531276	0.927822
SEC24C	0.240814	0.147339	0.715836	0.99255	0.890976	0.0487466
DPYSL2	0.0225495	0.064462	0.734321	0.996976	0.746946	0.518489
COL27A1	0.143676	0.0490127	0.700713	0.985481	0.411878	0.936822
LRIG1	0.155944	-0.0929259	0.681216	0.97618	0.155072	0.998476
SLC39A6	0.261822	0.0483031	0.711447	0.99255	0.623619	0.735485
TLN2	0.127882	-0.0639517	0.693471	0.983865	0.251665	0.999982
SYK	0.0428571	-0.021708	0.716204	0.99255	0.420899	0.972973
SEL1L3	0.197324	0.076937	0.693562	0.983865	0.687926	0.695074
LRBA	0.125	0.0918146	0.69959	0.985481	0.630167	0.646204
NOLC1	0.0917139	0.0430869	0.725687	0.99574	0.420187	0.779736
LTBP2	0.0803506	0.0221648	0.691866	0.983865	0.364469	0.995844
CDKN1A	1	1	0.719954	0.99255	0.997098	1.11537e-05
TUBGCP6	0.106302	0.0692187	0.7088	0.992325	0.468984	0.989853
VPS39	0.196924	-0.0229953	0.719602	0.99255	0.65575	0.944707
AGGF1	0.204543	0.0654139	0.744413	0.996976	0.858251	0.412634
UBA7	0.0250089	-0.0136635	0.698917	0.985481	0.5	0.979874
PTPN21	0.0815194	0.0510689	0.708923	0.992325	0.581588	0.919523
SMC5	0.144347	0.0984665	0.712077	0.99255	0.776224	0.328131
EIF4G3	0.0921075	0.0776173	0.717502	0.99255	0.786781	0.137641
INADL	0.155172	0.00140994	0.726606	0.99574	0.622864	0.932245
ADAMTS1	0.165386	0.0508752	0.679708	0.97618	0.462397	0.977463
CD163	0.104626	-0.00809062	0.703043	0.987589	0.38875	0.999927
ASPM	0.0768662	0.0214991	0.717546	0.99255	0.681152	0.983283
C2CD2	-0.805085	-0.230595	0.725424	0.99574	0.0774788	0.999939
LAMA2	0.0561201	0.0448466	0.69502	0.984473	0.511694	0.963122
ATP10D	0.0744986	0.0635941	0.697564	0.985481	0.648178	0.825315
IFT140	0.0523677	-0.103455	0.699889	0.985481	0.422141	0.999995
WWC2	0.276742	0.0996078	0.717636	0.99255	0.747931	0.276848
MYOF	0.0978697	0.0641849	0.711998	0.99255	0.703255	0.788725
HERC4	0.200238	0.0830599	0.712706	0.99255	0.732265	0.414753
COL15A1	0.136507	0.0327533	0.679874	0.97618	0.241696	0.979832
ACADVL	0.170114	0.0695529	0.719931	0.99255	0.688716	0.448003
NUP188	0.0329441	-0.055339	0.746129	0.996976	0.505734	0.997275
ACACB	0.196348	0.0322368	0.737596	0.996976	0.389213	0.999779
GPSM1	0.201295	0.105874	0.770913	0.996976	0.870462	0.881874
LIMD1	-0.251166	0.0137411	0.743276	0.996976	0.515992	0.906871
SETBP1	0.0405215	0.0515654	0.748414	0.996976	0.42588	0.982516
ROBO4	0.0353565	-0.0262113	0.747504	0.996976	0.372925	0.999495
CDH3	0.0687979	-0.30241	0.739862	0.996976	0.540699	0.999448
VPS13C	0.174391	0.13821	0.727667	0.99574	0.965247	0.000456703
VIM	-0.12388	0.0539248	0.751138	0.996976	0.517907	0.941775
BRD3	0.0399217	-0.0481581	0.741506	0.996976	0.623357	0.972025
ANKFY1	0.127476	-0.0975458	0.74899	0.996976	0.465665	0.982923
FAM53C	0.233058	0.104666	0.761908	0.996976	0.857075	0.0872562
RNF213	0.0351716	0.00278038	0.724037	0.99574	0.185428	1
COL5A2	0.0197942	0.00471813	0.656893	0.969476	0.638694	0.709137
STC2	-0.0249158	-0.0881513	0.728979	0.99574	0.318848	0.965351
RALGAPA1	0.256668	0.150697	0.757425	0.996976	0.919916	0.0498708
NRP1	0.0915102	-0.0721123	0.728732	0.99574	0.547198	0.990813
CBFB	0.144196	0.0893946	0.761398	0.996976	0.999306	0.0118543
TGFBR3	0.0223961	0.00674946	0.729978	0.995958	0.512629	0.948102
LONRF1	0.107916	0.0945779	0.743719	0.996976	0.688716	0.56744
ANKRD17	0.121971	0.0238288	0.75158	0.996976	0.734286	0.927048
NISCH	0.121385	-0.118805	0.714412	0.99255	0.244795	0.999942
AIM1	0.134367	0.0439276	0.735818	0.996976	0.605832	0.793971
UBAP2	0.169729	-0.0879501	0.734745	0.996976	0.437484	0.978256
PER1	0.0598712	0.0207792	0.74795	0.996976	0.224147	0.990162
SEC24B	0.0885287	0.10736	0.753973	0.996976	0.847841	0.94545
MAST3	0.108796	-0.0332103	0.752123	0.996976	0.658357	0.998327
LCMT2	0.0923894	-0.0502128	0.796328	0.996976	0.555647	0.978133
MAPKBP1	0.106591	0.0297265	0.76518	0.996976	0.649496	0.96597
ZNF395	0.400564	-0.101828	0.752819	0.996976	0.523827	0.943013
APP	-0.0850832	0.0484755	0.760771	0.996976	0.638988	0.809863
FGD5	0.0926586	-0.0946399	0.735099	0.996976	0.202421	0.999986
DAPK1	0.034206	0.0408023	0.757122	0.996976	0.489846	0.98405
FBXO31	0.207961	0.0251293	0.770783	0.996976	0.720295	0.83866
MBD1	0.241875	0.127714	0.764658	0.996976	0.75597	0.4323
DCLK1	0.0451772	-0.0147942	0.756343	0.996976	0.5	0.904581
HIPK1	0.0241327	-0.0601329	0.771426	0.996976	0.715332	0.958456
SYNPO2	0.0772963	0.051222	0.754088	0.996976	0.652912	0.990493
KBTBD6	0.231502	0.118284	0.785992	0.996976	0.856941	0.0943079
MAST4	0.16992	0.00112613	0.738537	0.996976	0.403286	0.995388
SYNPO	0.145961	0.0985757	0.788288	0.996976	0.747877	0.668994
RNF214	0.0417178	0.0672716	0.790802	0.996976	0.938545	0.427384
KANK2	0.103048	0.0167797	0.776711	0.996976	0.307323	0.997833
MOXD1	0.0302561	-0.0442992	0.748893	0.996976	0.264571	0.989882
PHACTR2	0.244528	0.0289276	0.778065	0.996976	0.92111	0.337754
TOPORS	0.0782593	0.0307032	0.756189	0.996976	0.882879	0.904568
ZEB2	0.0911762	0.0270801	0.775863	0.996976	0.846598	0.982733
XPO4	0.109355	0.115287	0.758362	0.996976	0.88403	0.104104
JMJD1C	0.0876158	0.0952381	0.746349	0.996976	0.894872	0.0990491
KDM3B	0.164269	0.100225	0.776762	0.996976	0.822738	0.421527
HYDIN	0.0121866	-0.209868	0.777445	0.996976	0.183878	0.926221
ARID1A	1	1	0.785734	0.996976	1	1.84978e-50
RPTOR	0.167011	-0.0417947	0.788325	0.996976	0.623357	0.999045
CCAR1	0.118216	0.0384374	0.768397	0.996976	0.918383	0.128162
ZNF202	0.126874	-0.188724	0.808029	0.996976	0.330016	0.999848
NT5DC2	0.146333	-0.0649735	0.770583	0.996976	0.331849	0.988678
SNX9	0.076677	-0.0302491	0.766341	0.996976	0.531384	0.968156
LZTS1	0.179466	0.0680484	0.766105	0.996976	0.608336	0.810578
TRPM2	0.16341	0.0400733	0.795872	0.996976	0.306181	0.999999
SIK1	0.0915217	-0.216967	0.776568	0.996976	0.611485	0.998127
MPDZ	0.0905576	0.070008	0.765151	0.996976	0.759802	0.680229
ADAMTS9	0.18057	0.0591527	0.78002	0.996976	0.864045	0.660992
DENND1A	0.190867	0.0688316	0.796225	0.996976	0.647481	0.956307
ANKHD1	0.0931753	0.0569915	0.768273	0.996976	0.811453	0.346849
DPP9	0.12182	-0.124907	0.798964	0.996976	0.411182	0.997261
PFKL	0.0685746	0.00962224	0.783517	0.996976	0.608214	0.992811
ARID2	0.672348	0.209457	0.792514	0.996976	0.984429	8.89549e-09
TBC1D5	0.146079	0.000333766	0.776865	0.996976	0.667538	0.824403
SLCO2B1	0.151018	0.0168185	0.852321	0.996976	0.66345	0.975251
SVIL	0.193856	0.0591427	0.815819	0.996976	0.745784	0.913953
XPNPEP1	0.130997	0.033551	0.817709	0.996976	0.779256	0.684954
KIAA0586	0.0933532	0.0521242	0.80402	0.996976	0.868326	0.696376
TRIOBP	0.0536222	0.0103794	0.789239	0.996976	0.432995	0.996697
IQGAP1	0.28526	0.0557202	0.803172	0.996976	0.695316	0.633858
MUC6	0.607235	0.176188	0.804555	0.996976	0.971804	0.000734796
DYNC1H1	0.13755	-0.00688863	0.808037	0.996976	0.341267	0.999987
IRS2	0.234783	0.154837	0.80028	0.996976	0.823689	0.594667
JAK2	0.223938	0.23913	0.793672	0.996976	0.976943	0.0851081
TOP3A	0.0899476	0.0243106	0.807855	0.996976	0.793933	0.957905
LARP1	0.265015	0.128749	0.796305	0.996976	0.99154	0.418174
SPG11	0.063486	-0.00549882	0.791549	0.996976	0.493062	0.996733
UNC5B	0.00381971	-0.161169	0.814317	0.996976	0.170753	0.999945
ITPR1	0.0612333	0.0884002	0.789762	0.996976	0.865339	0.986406
MCPH1	0.106179	-0.01761	0.805294	0.996976	0.758978	0.815238
MCC	0.171179	0.108687	0.811558	0.996976	0.939973	0.161426
TTC7B	0.0926464	0.0312372	0.829069	0.996976	0.87381	0.855668
COL16A1	0.0612892	-0.0818432	0.824859	0.996976	0.58082	0.999979
CASZ1	0.204918	0.0546407	0.820072	0.996976	0.608582	0.997977
TNFRSF10B	0.200606	0.114224	0.854627	0.997314	0.915423	0.304866
KDM4B	0.0138122	-0.318236	0.826524	0.996976	0.34425	0.999991
ATP8B1	0.345426	0.158289	0.822371	0.996976	0.88349	0.0350589
ITGA4	0.167019	-0.0049435	0.810772	0.996976	0.615234	0.990053
POSTN	0.117169	-0.0092751	0.803454	0.996976	0.74207	0.882959
PLCG2	0.116439	0.0174013	0.822866	0.996976	0.752987	0.975476
NLN	0.0573906	-0.0745259	0.807381	0.996976	0.610217	0.986921
RIPK4	0.231302	0.0838726	0.829151	0.996976	0.793933	0.659985
LRRC16A	0.17966	0.0856916	0.793708	0.996976	0.893439	0.391373
ZBED4	0.121995	0.0351589	0.827296	0.996976	0.489626	0.986046
FGFR2	0.179092	0.0830091	0.813599	0.996976	0.8125	0.742751
ALDH1B1	0.16603	0.031488	0.870635	1	0.857117	0.92253
ZBTB4	0.111589	0.0103739	0.82202	0.996976	0.48975	0.985509
PIK3C2A	0.0766949	0.00492409	0.816664	0.996976	0.733688	0.941628
ZC3H12C	0.0572937	-0.00192308	0.820035	0.996976	0.761595	0.958738
PRDM15	0.0652469	0.0147695	0.832599	0.996976	0.487449	0.99559
VCAN	0.0634916	0.0378279	0.762521	0.996976	0.154253	0.999995
TRIM2	0.148733	-0.0291541	0.825173	0.996976	0.779566	0.930313
HERC6	0.0718669	0	0.793274	0.996976	0.862305	0.967027
ATHL1	0.0471194	-0.062596	0.850842	0.996976	0.411182	0.996457
RIOK1	0.398148	0.0227394	0.831096	0.996976	0.875	0.589225
OBSL1	0.123042	-0.00352423	0.850719	0.996976	0.306249	0.999991
HINFP	0.29593	0.119912	0.851962	0.996976	0.846598	0.358931
SLC7A2	0.172804	-0.10509	0.811806	0.996976	0.204698	0.98746
PTPRS	0.131107	0.0556759	0.822607	0.996976	0.754616	0.943692
ELF1	0.0521198	0.0286037	0.844511	0.996976	0.853041	0.64176
NLRC5	0.0693627	0.054472	0.814091	0.996976	0.479251	0.990986
POLI	0.168593	0.0186948	0.816147	0.996976	0.726567	0.889187
PRDM10	0.0957771	0.117492	0.826412	0.996976	0.945068	0.514916
ECE1	0.140546	0.00327065	0.846146	0.996976	0.631711	0.980144
UBXN11	-0.0720803	-0.10015	0.839661	0.996976	0.528346	0.993418
WDR6	0.0293381	-0.044712	0.821031	0.996976	0.351444	0.997459
HPS4	0.159225	-0.224991	0.81834	0.996976	0.377594	0.999856
LAMA3	0.106533	0.0132824	0.822025	0.996976	0.477121	0.99188
SCAF1	0.17768	0.101153	0.835608	0.996976	0.912493	0.214791
LZTR1	0.349872	0.231596	0.844701	0.996976	0.952397	0.254878
SLC4A7	0.291339	0.0849854	0.845192	0.996976	0.884695	0.0748777
KIAA1211	0.0338933	-0.154548	0.8376	0.996976	0.5	0.998801
STK11	0.544434	0.520094	0.845891	0.996976	1	7.66203e-05
BRCA1	0.0382006	-0.0786667	0.836659	0.996976	0.693819	0.985061
P4HA2	0.211817	0.0862237	0.852511	0.996976	0.816876	0.854416
EDC4	-0.0114017	-0.00505532	0.863841	0.998344	0.532188	0.994216
LOXL2	0.107331	-0.00310193	0.844046	0.996976	0.715576	0.973229
MYLK	0.112628	-0.00953778	0.836465	0.996976	0.596907	0.999959
INPP5B	0.203075	0.108376	0.845227	0.996976	0.807019	0.689014
GPATCH8	0.173613	0.0644969	0.858171	0.997813	0.81925	0.272759
ITGA2	0.194201	0.0320522	0.829081	0.996976	0.952612	0.896048
PLD2	0.0740944	-0.216045	0.846856	0.996976	0.323409	0.999623
LRRC8A	0.0862391	-0.496148	0.90294	1	0.429084	0.999983
PHLPP1	0.31723	0.234764	0.838632	0.996976	0.907836	0.0983516
MLLT4	0.229167	0.156797	0.847762	0.996976	0.902148	0.15878
SAFB	0.142372	0.0829828	0.85827	0.997813	0.99884	0.291606
DEAF1	0.0505162	-0.0823232	0.846603	0.996976	0.623357	0.99028
FAT4	0.0730539	0.00470333	0.839422	0.996976	0.330055	0.999956
SH3TC1	0.0423542	0.0287371	0.835533	0.996976	0.195718	0.999965
FNDC1	0.0581062	0.0116525	0.838771	0.996976	0.505388	0.984188
TLN1	0.153433	0.0388751	0.874704	1	0.939361	0.494429
KIAA2026	0.0667114	0.00522975	0.835919	0.996976	0.5	0.982551
YTHDC2	0.0862986	0.0752883	0.828538	0.996976	0.922035	0.346358
MEN1	0.582645	0.334796	0.863021	0.998344	0.986102	0.00984479
OSBPL5	0.0463187	-0.253831	0.845349	0.996976	0.665061	0.997965
TCOF1	0.0438062	-0.0273843	0.883854	1	0.313497	0.997614
CARS	0.169107	-0.150973	0.853877	0.997314	0.327522	0.999841
DDX60	0.107644	0.0431445	0.844253	0.996976	0.362914	0.9659
MALT1	0.320653	0.139298	0.859473	0.998233	0.888234	0.409175
XPC	0.0451764	-0.129197	0.851889	0.996976	0.489685	0.99957
FAT2	0.197889	0.0788835	0.85629	0.997464	0.80745	0.645894
PTPRG	0.162357	0.0640761	0.844041	0.996976	0.823144	0.668584
RGS3	0.192099	0.0541383	0.899429	1	0.974274	0.560201
SFMBT1	0.28952	0.0626588	0.867106	0.999049	0.725906	0.818091
RXRA	0.154781	-0.134667	0.862751	0.998344	0.867272	0.982305
KANK1	0.227357	-0.0723946	0.868592	0.999049	0.5	0.998106
TRANK1	0.0445044	-0.025771	0.848186	0.996976	0.205446	1
CES2	0.0234113	-0.059507	0.877889	1	0.376381	0.99457
HPS1	0.199687	0.021555	0.864615	0.998344	0.869718	0.977225
CTBP2	0.0457582	0.00512295	0.888782	1	0.746846	0.99872
RREB1	0.0615866	-0.0286807	0.86352	0.998344	0.334435	0.999941
AGTPBP1	0.431766	0.0948617	0.867888	0.999049	0.816692	0.702613
DICER1	0.233951	0.135087	0.855321	0.997314	0.951732	0.557465
APCDD1	0.0985813	-0.0325397	0.891699	1	0.718728	0.960628
SFXN4	0.134562	0.017213	0.873963	1	0.617676	0.905141
NCOR2	0.0493741	0.0152884	0.865948	0.998912	0.678578	0.999899
ADAMTS2	0.0609197	-0.0152045	0.874462	1	0.547016	0.998702
ZCCHC2	0.0898786	-0.0383198	0.852218	0.996976	0.749203	0.992847
RAP1GAP2	0.0720612	-0.127043	0.877491	1	0.62223	0.994139
QARS	0.132958	-0.138617	0.887557	1	0.612008	0.985063
KIAA0922	-0.0320055	-0.204232	0.860615	0.998344	0.376688	0.999996
COL4A2	0.0991379	0.0341236	0.851712	0.996976	0.734021	0.991242
CSPG4	0.148688	-0.00284298	0.878538	1	0.61647	1
KLHL18	0.454374	0.0653069	0.879202	1	0.718438	0.894009
TRIM16	0.010191	-0.0893577	0.882651	1	0.515704	0.993342
PDE4DIP	0.132279	0.0150979	0.904024	1	0.623296	0.999895
EVPL	0.102172	0.011687	0.886613	1	0.416868	0.999792
GRK5	0.0624754	0.0185574	0.888169	1	0.849135	0.874253
UBE4B	0.478923	0.0491788	0.882249	1	0.856283	0.901519
KLHL36	0.292929	-0.156745	0.886654	1	0.471971	0.996523
EPS8L2	0.153355	0.0343367	0.896306	1	0.779101	0.864509
F2R	0.17264	-0.107804	0.913864	1	0.809814	0.991247
PTK2B	0.0952965	-0.0769981	0.886561	1	0.481308	0.998851
DOCK5	0.155235	0.0978964	0.889392	1	0.978514	0.582429
SPTAN1	0.132677	0.0631089	0.875915	1	0.879708	0.573713
TNPO1	0.424826	0.131603	0.880959	1	0.987343	0.0261734
PLEKHA5	0.254423	0.0751154	0.888335	1	0.928954	0.3356
B2M	1	1	0.885957	1	0.99985	3.60371e-08
IL6ST	0.117828	-0.0128365	0.889477	1	0.941586	0.660528
MLH1	0.50522	0.293578	0.893869	1	0.982549	0.0197943
NDOR1	0.202977	-0.367974	0.904288	1	0.672478	0.999273
DIP2C	0.109015	0.0670913	0.894775	1	0.86221	0.839914
DOPEY2	0.144292	0.0589949	0.89496	1	0.711784	0.995639
KIF13B	0.213645	0.0901318	0.894943	1	0.680974	0.72591
TJP1	0.187358	0.0641021	0.896289	1	0.958216	0.301292
TNRC6B	0.227417	0.0302326	0.896944	1	0.904554	0.247008
RHOBTB2	0.181423	0.0197025	0.905693	1	0.700469	0.919655
FAM160B1	0.290718	0.0910683	0.907304	1	0.88288	0.698152
DIS3	0.267261	0.0552017	0.890986	1	0.997375	0.64292
MGA	0.130008	0.0699923	0.907261	1	0.961275	0.207429
AMBRA1	0.322702	0.0785875	0.909451	1	0.898529	0.459514
CNDP2	0.114609	0.0145955	0.901015	1	0.747665	0.958713
ACTN1	0.187956	-0.113397	0.915066	1	0.608214	0.999062
SREBF1	0.121624	0.0842872	0.916356	1	0.956271	0.470228
TRPV2	0.155645	0.0290301	0.902878	1	0.730118	0.925915
LAMA4	0.103607	-0.0200515	0.912716	1	0.436029	0.999902
AP1G1	0.150508	-0.121096	0.918688	1	0.777364	0.984489
CYFIP1	0.0578902	-0.421027	0.910035	1	0.417272	1
SIK3	0.378089	0.101982	0.90824	1	0.892987	0.649174
IKBKB	0.0797186	0.0508475	0.917513	1	0.955219	0.921187
PIKFYVE	0.145956	-0.0564516	0.918728	1	0.822909	0.997494
PARP4	0.111427	0.0215342	0.913313	1	0.318495	0.999973
SPRY1	0.127825	0.0289741	0.923977	1	0.929503	0.741123
COL7A1	0.0661427	0.0178632	0.911632	1	0.752996	0.993075
PPRC1	0.0828708	0.0125369	0.921461	1	0.810191	0.979727
TRIM8	0.171631	0.0412455	0.930284	1	0.861637	0.88105
PTPRJ	0.172756	-0.00589908	0.92343	1	0.863281	0.996222
MAML2	0.083024	-0.379111	0.919137	1	0.624235	0.999981
DMBT1	0.216151	0.0453975	0.92594	1	0.798608	0.995128
ITGA1	0.129689	-0.0281124	0.923357	1	0.938025	0.979174
NBEA	0.229759	0.0468271	0.925995	1	0.962529	0.558699
PCLO	0.186422	0.0308542	0.932085	1	0.90178	0.925523
AP3D1	0.147204	-0.171281	0.93719	1	0.578338	0.999996
CSDE1	0.322109	0.0566469	0.933314	1	0.939929	0.259378
TECPR2	0.197183	-0.0339614	0.937647	1	0.803248	0.995588
HIVEP1	0.11361	-0.0633956	0.930427	1	0.840361	0.99953
WHSC1	0.311741	-0.0141127	0.936607	1	0.868984	0.948789
IPO11	0.260299	0.0665014	0.931457	1	0.986073	0.589777
MAP2K4	0.386699	0.337494	0.940199	1	1	0.000156407
MTMR3	0.254909	-0.111266	0.931723	1	0.735016	0.998495
ARID1B	0.24322	0.185652	0.898055	1	0.98974	0.000153139
MLLT10	0.37577	0.121468	0.944023	1	0.975432	0.0738055
SEMA3F	0.308404	0.0380567	0.944741	1	0.854358	0.957378
FAT1	0.221888	0.11877	0.932647	1	0.971545	0.0346174
CREBBP	0.182415	0.113625	0.930317	1	0.998621	0.00670032
ATP11A	0.219784	-0.0580401	0.937626	1	0.342974	0.999912
CENPE	0.0252809	-0.108657	0.939362	1	0.762874	0.999946
SORBS2	0.230685	0.108665	0.937382	1	0.962875	0.78596
PLCB1	0.082006	0.0223848	0.936643	1	0.97274	0.979563
MYO5B	0.16146	-0.0673712	0.952453	1	0.790817	0.999901
FANCD2	0.429641	0.073991	0.946899	1	0.888431	0.577003
C3	0.214887	0.0689537	0.947943	1	0.922284	0.999392
MKI67	0.0579664	0.0147931	0.95519	1	0.575081	0.999958
SEMA6A	0.113563	0.0167708	0.945442	1	0.98291	0.988906
DDX41	0.442151	0.0206379	0.954211	1	0.915423	0.678377
ZBTB7A	0.165636	-0.0308519	0.952373	1	0.915423	0.982816
PVRL1	0.239316	0.0673762	0.953623	1	0.817681	0.870776
GSR	0.268996	0.0266446	0.949991	1	0.858251	0.862301
GPS2	1	0.250986	0.956219	1	0.997602	0.0322101
LAMB2	0.0852535	0.0250482	0.955281	1	0.553027	0.99722
CUBN	0.156147	-0.173865	0.954111	1	0.586401	0.999689
ENC1	0.131873	-0.00978823	0.963472	1	0.872486	0.983754
MTOR	0.208942	0.0848806	0.963144	1	0.967866	0.226535
VCAM1	0.129651	0.0105694	0.964084	1	0.940552	0.982536
PASK	0.0609228	-0.219347	0.96612	1	0.447472	0.999999
RBM47	0.27557	0.0220907	0.968771	1	0.99707	0.851927
OTUD4	0.146221	0	0.963958	1	0.962881	0.952306
FLI1	0.176134	-0.0500311	0.96863	1	0.967773	0.95446
PPP6C	0.466951	0.0703882	0.963364	1	0.977543	0.655093
DOT1L	0.129892	0.0111636	0.963469	1	0.835544	0.99901
LATS2	0.381179	0.057645	0.971934	1	0.957222	0.959785
TSC2	0.172611	-0.0138282	0.974163	1	0.877264	0.999441
FBXO30	0.192977	-0.047541	0.968344	1	0.857905	0.989996
ZFP36L1	1	0.203141	0.975285	1	0.996385	0.00473384
VCL	0.375635	0.0406091	0.97506	1	0.899532	0.790404
FAM65A	0.223762	0.0283546	0.974047	1	0.944233	0.983128
EDIL3	0.207957	-0.12564	0.974603	1	0.95824	0.912075
NCOR1	0.0911681	0.0499821	0.971299	1	0.982626	0.316053
JAK1	0.633926	0.234635	0.974773	1	0.994092	0.0117782
SUPT6H	0.485714	0.0145055	0.977617	1	0.908151	0.967079
PALLD	0.170333	-0.00185517	0.972714	1	0.923462	0.998821
MYO19	0.380361	-0.0130187	0.981374	1	0.902448	0.971659
MYH9	0.243584	0.100505	0.980345	1	0.981303	0.879055
MED23	0.49028	0.14066	0.977803	1	0.991984	0.255756
SLCO3A1	0.401578	-0.0369853	0.979277	1	0.846756	0.998339
STK10	0.209531	-0.00119178	0.98025	1	0.878638	0.991854
KIAA1217	0.179796	0.00240751	0.986695	1	0.896654	0.999954
APC	1	0.309514	0.98311	1	1	2.56759e-25
ITGB2	0.122757	-0.459179	0.985641	1	0.849513	1
CABIN1	0.307312	0.048676	0.986578	1	0.968308	0.989131
SFI1	0.152098	-0.132629	0.984924	1	0.976074	0.996765
SETD2	0.572967	0.342561	0.987918	1	1	8.46761e-12
C10orf76	0.306346	-0.097913	0.988566	1	0.980945	0.862462
AXIN1	0.201614	0.0996429	0.985723	1	0.999075	0.928223
COL6A2	0.108458	-0.253918	0.989646	1	0.663111	1
EVC	0.120885	-0.566457	0.984846	1	0.898193	0.999997
NLGN2	0.264724	0.0740979	0.992389	1	0.974148	0.814505
JAG2	0.142003	-0.1501	0.987511	1	0.988807	0.999617
VHL	0.683794	0.328594	0.992091	1	1	0.0216957
RASA1	1	0.378279	0.989701	1	0.999966	3.30498e-07
TRAK1	0.502333	0.00957943	0.992459	1	0.931184	0.988738
SLC26A6	0.263552	-0.155512	0.994586	1	0.973683	0.996407
DEPDC5	0.307035	0.046875	0.994656	1	0.989668	0.910387
IRF2	0.359227	0.0700861	0.994201	1	0.999067	0.209944
CDH11	0.227848	-0.0287096	0.994796	1	0.881259	0.999963
PSIP1	1	0.154991	0.994846	1	0.999822	0.0153383
ATG7	0.526999	-0.104487	0.995478	1	0.95722	0.998246
PLXNB2	0.294434	0.0636584	0.996193	1	0.937025	0.999546
ANKRD11	0.133223	-0.272747	0.99642	1	0.722761	1
SMAD4	0.594229	0.402586	0.997777	1	1	1.02018e-05
KEAP1	0.328885	0.202142	0.997689	1	1	0.000308499
USP54	0.676506	-0.0321766	0.998847	1	0.961358	0.990116
CYLD	0.481842	-0.0112239	0.999717	1	0.993236	0.919142
SMARCA4	0.437372	0.12931	0.999732	1	0.999265	0.33547
TGFBR2	0.750096	0.248826	0.999882	1	0.999964	0.0349786
BRD7	1	0.0921906	0.999947	1	0.999544	0.139331
NSD1	0.397466	0.0475087	0.99994	1	0.999917	0.41541
RB1	1	0.377952	0.999986	1	1	2.80654e-13
BAP1	0.703641	0.20997	0.999992	1	1	0.112895
TSC1	1	-0.0382853	0.999995	1	0.999856	0.893358
FUBP1	1	-0.00342075	1	1	1	0.52654
PBRM1	1	0.234513	1	1	1	3.0275e-06
NF1	1	0.274631	1	1	1	2.28356e-11
CDH1	1	0.118306	1	1	1	0.111805
CIC	1	0.146424	1	1	1	0.000695195

## Sheet: 3) Analysis of amplifications
	Number of HeZD samples	Number of CNN samples	Number of Amp samples	median_CADD_HeZD	median_CADD_CNN	median_CADD_Amp	p_CADD_HeZD_Amp
INTS10	2300	4782	665	0	19.15	19.555	0.0138887
BRPF1	1477	5816	558	0	17.13	16.915	0.018689
SMG1	520	6272	1077	0	16.83	17.35	0.00253106
KIF20B	1553	5987	297	7.739	15.02	4.558	0.840375
RTTN	1892	5548	369	0	13.92	12.695	0.00596111
UPF2	1016	5948	901	0	19.26	18.42	0.0241417
SORL1	1393	5954	490	12.5	17.71	14.31	0.278256
BRD1	1664	5683	459	0	16.61	15.16	0.136604
ACACA	921	6102	837	3.773	20.5	14.03	0.261343
SNX25	1490	6029	271	13.11	20.2	17.44	0.343547
REV3L	1548	5853	415	13.21	17.31	12.56	0.642059
MYO5A	1149	6355	346	13.81	20.7	14.545	0.353142
RSF1	726	6256	885	0	15.29	12.74	0.111722
POLR2A	2262	5283	302	11.55	18.93	15.04	0.384685
PRICKLE2	1650	5821	380	9.9485	14.75	11.17	0.259487
PRPF8	2105	5392	356	18.12	21.05	19.135	0.303637
STXBP5	1500	5919	428	0	19.06	16.67	0.0729906
ASCC3	1524	5881	410	16.14	20.35	23.9	0.00456022
MST1R	1802	5713	328	3.356	13.845	14.09	0.0383387
TLR4	1147	6120	598	4.384	10.44	8.443	0.274176
BUD13	1423	5943	464	0	14.1	18.68	0.130825
AP2A2	1280	6190	370	5.737	16.5	0	0.78704
NEURL4	2262	5278	307	11.84	18.54	15.35	0.32567
TTC3	999	6247	609	5.894	14.3	15.375	0.0203891
PPIP5K2	1335	5897	598	0.01	18.255	15.168	0.187792
PPP1R13B	1261	5999	591	5.32	20.5	19.565	0.109531
SREBF2	1599	5781	478	0	16.44	27.95	0.0407585
PI4KA	1300	5968	597	12.19	18.915	17.385	0.084166
MINK1	2139	5386	334	4.663	18.81	11.6	0.215851
MYH10	2248	5309	301	18.38	21.9	18.28	0.274653
MON1B	1612	5628	603	13.98	19.6	19.64	0.108955
SYNJ2	1581	5851	404	7.8065	15.38	4.419	0.529509
EIF2AK4	1345	6213	271	12.535	18.705	17.56	0.209649
INTS9	2184	4855	707	0	17.89	14.99	0.160936
CTCF	1482	5736	636	23	32	12.47	0.798833
USP31	543	6271	1054	3.292	17.46	20.8	0.112547
RAPGEF6	1216	5935	697	15.14	25.9	19.65	0.16177
ST5	1193	6290	371	0.007	18.52	23.4	0.0220108
ARHGEF12	1405	5944	489	13.73	18.73	21.2	0.0841917
LRP4	807	6552	503	7.564	21.2	18.365	0.0497916
DDX24	1299	5987	560	0	15.53	0.04	0.437988
YLPM1	1361	5999	503	14	17.015	13.04	0.380054
ATP2C2	1648	5589	594	1.203	13.86	16.4	0.017819
FIG4	1547	5850	418	12.21	16.7	15.435	0.0630722
AHI1	1437	5929	491	10.9495	18.85	14.12	0.151485
FARP1	1223	5666	971	9.164	13.675	7.846	0.258238
CUL9	525	6263	1080	0	15.19	13.865	0.0707524
AARS	1483	5719	646	6.595	18.78	23.1	0.0808947
CHD4	505	6093	1266	17.2	18.48	18.93	0.0459219
CHD1	1364	5878	578	13.53	18.97	4.7275	0.879252
TRIP12	807	6579	452	18.01	22.9	19.19	0.343326
PCNX	1383	6009	476	11.23	16.62	18.9	0.0652076
GUCY1A3	1362	6215	268	7.6	16.49	30.2	0.0664542
HSPA4	1213	5944	694	16.93	21.75	20.795	0.241795
UPF1	579	6527	760	0	15.37	22.2	0.00312254
LLGL1	2028	5443	381	9.42	17.085	3.9165	0.691034
CSGALNACT1	2288	4789	668	0	14.06	17.61	0.0126063
PNPLA6	1008	6298	557	0	13.58	17.93	0.0915863
MDN1	1472	5922	416	11.71	13.325	15.14	0.0235574
GEMIN5	1089	6016	757	4.28	14.415	16.27	0.0477332
DHX34	926	6178	754	8.527	13.04	17.5	0.0186315
ALS2	516	6726	615	6.6645	18.01	9.7835	0.262435
RBM25	1365	6011	490	14.35	16.895	18.955	0.0521152
NUP98	1267	6207	373	13.64	18.89	8.17	0.553956
DDX17	1500	5835	529	14.76	20.8	14.33	0.273073
ENPP1	1453	5939	466	9.547	19.24	22.5	0.0392871
EXPH5	1389	5955	480	0	11.42	11.21	0.0752117
RAP1GDS1	1272	6351	237	13.32	17.98	26.8	0.0205774
ZNF292	1457	5939	413	10.53	14.96	11.01	0.615457
WDR7	1874	5594	358	14.84	19.84	11.77	0.349174
SNW1	1305	6046	510	0	21.6	28.7	0.0324482
LARS	1111	6018	736	10.97	16.65	13.06	0.228416
ABLIM1	1447	6048	360	7.38	15.69	19.26	0.0683321
DYM	1798	5652	405	0	16	7.115	0.63834
TNRC6A	516	6268	1083	6.894	16.805	14.855	0.169346
SEC31A	1202	6371	286	11.31	19.315	14.32	0.452744
SETD1A	439	6324	1107	4.349	10.27	9.6425	0.132863
MACF1	937	6299	630	14.6	16.87	16.225	0.0736796
TTLL5	1345	6016	501	14.51	19.265	14.53	0.419322
PCDH1	1113	6027	724	1.184	12.845	16.305	0.0399134
NUP214	1163	6095	603	10.1705	15.6	16.8	0.0469739
SPG7	1626	5586	609	0.611	13.04	21.59	0.0869431
USP8	1173	6340	334	12.95	18.86	10.59	0.80771
ARID5B	1188	6218	457	10.41	14.57	13.515	0.283142
BRD4	566	6484	815	6.333	13.75	12.93	0.212594
OSBPL1A	1235	6004	626	12.935	16.31	15.46	0.264739
SENP6	1230	6119	494	7.821	14.21	20	0.340177
PDE4D	1363	5939	522	16.25	21.55	13.18	0.620989
LRP5	529	6417	918	4.338	14.765	17.11	0.073422
NOC3L	1519	6036	293	8.531	16.16	16.27	0.472468
ZC3H13	1692	5396	695	13.46	16.08	18.87	0.0230425
VPS53	2096	5389	362	14.35	21.4	14.8	0.429996
CHD9	1347	5845	655	15.155	17.97	18.06	0.239939
ING1	1161	5675	1026	0.057	12	12.64	0.227198
MAP3K1	1292	5982	550	18.75	25.9	40	0.00473014
FAM178A	1515	6019	316	10.5	14.54	11.26	0.5
TRRAP	302	5503	2063	5.055	16.92	18.59	0.0581082
INVS	1211	6100	545	11.5845	17.69	13.78	0.269936
BTBD7	1294	5997	555	17.23	20.4	21.6	0.182097
FBN1	1216	6314	312	15.45	19.17	3.5205	0.91665
CDC27	778	6183	896	17.58	25	30.75	0.0250772
HTT	1195	6204	455	9.247	16.15	17.85	0.188556
USP6NL	1016	5955	895	6.657	13.295	0	0.77942
FN1	701	6643	505	11.76	18.46	17.95	0.241976
ESCO1	1084	6124	662	8.298	16.56	12.365	0.32007
CXXC1	1851	5627	362	13.975	16.36	19.46	0.00678473
DIAPH1	1111	6033	722	10.75	17.03	16.415	0.343915
CNOT1	1456	5790	610	18.33	24.05	24.1	0.04326
RPAP1	1340	6210	274	12.57	16.73	9.612	0.476609
PLEKHG1	1511	5906	426	7.784	14.59	18.565	0.104559
ATG2A	563	6639	662	0.01	11.355	13.035	0.0290417
NID2	1141	6153	575	10.8	14.97	6.5375	0.57814
ZC3H18	1626	5595	604	15.095	20.3	16.68	0.450052
IKBKAP	1170	6126	570	9.8875	15.39	13.385	0.191717
LAMA1	1211	5877	775	0	10.375	11.74	0.0610092
ACOX3	1197	6227	434	7.897	13.22	13.925	0.0729385
TCERG1	1104	6027	735	15.615	18.06	21.35	0.0240402
RRP12	1519	6022	311	0	13.98	19.565	0.0960688
FXR2	2270	5274	298	13.195	19.95	20.6	0.378203
VPS13D	1377	6057	418	15.84	16.11	13.44	0.420786
NEDD4	1145	6380	323	7.1735	15.96	20.49	0.206065
VPRBP	1816	5730	303	11.83	19.12	24.67	0.0946576
TBC1D4	1419	5578	834	12.1	16.5	14.41	0.332341
SLIT3	1077	5983	797	7.9395	15.47	17.36	0.129179
MYCBP2	1386	5595	850	16.63	18.26	21.5	0.0160732
ACIN1	1070	6174	613	11.685	18.15	18.97	0.0346223
MAN1B1	1123	6043	694	0	14.47	9.312	0.59443
KIAA0100	811	6157	901	11.83	17.99	16.43	0.313105
IARS	1202	6117	539	12.31	21.2	16.31	0.278421
MYO1C	2090	5402	359	0	14.71	17.85	0.119304
RNF123	1793	5726	325	14.11	18.92	9.2	0.551281
ELAC2	2235	5315	297	0	11.035	6.876	0.258603
PITRM1	1041	5901	918	4.688	11.61	12.16	0.108396
EPB41L2	1441	5950	465	10.5325	15.83	12.45	0.229224
PTPRK	1463	5934	456	16.89	19.115	19.37	0.223134
SH3BP4	860	6497	463	7.225	13.005	0	0.70764
RNF145	1094	6003	766	16.135	16.975	15.08	0.539579
UHRF1BP1L	588	6524	754	7.58	16.01	16.15	0.177611
PDCD11	1517	6023	308	10.97	12.77	9.7425	0.359534
CPE	1369	6183	282	13.235	17.3	15.28	0.403484
N4BP2L2	1517	5554	768	7.2615	11.71	13.32	0.217639
FRAS1	1092	6417	349	8.223	14.26	16.155	0.134349
ATP13A2	1390	6095	368	4.583	11.43	0	0.884897
NUP205	461	5480	1922	6.227	17.94	16.8	0.151633
ZFYVE26	1383	5989	490	11.44	13.77	11.15	0.484208
LARP1B	1277	6331	248	11.097	15.35	14.925	0.267602
C15orf39	981	6423	456	10.07	12.68	4.202	0.767074
KDM4C	1806	5367	643	6.654	12.53	16.43	0.0405085
TNS1	703	6634	509	0	11.63	13.7	0.0596991
PXDN	386	6628	853	6.749	15.46	18.055	0.0646682
PAPD4	1434	5906	503	15.61	23.75	24.335	0.210348
KIAA0753	2216	5324	310	7.767	13.105	11.08	0.258276
SAFB2	1122	6220	520	10.76	16.05	0	0.952184
CAMTA1	1442	5959	436	8.179	14.985	9.344	0.462994
DDX60L	1377	6172	282	3.8925	10.41	4.732	0.486469
AKAP11	1677	5415	704	7.9115	13.12	8.335	0.431888
BRD8	1116	6023	724	12.11	15.67	21.75	0.0336771
EHMT1	1122	6054	684	2.117	12.09	13.21	0.231199
MAP3K5	1434	5937	485	15.34	17.355	23.7	0.0115215
FAM179B	1128	6164	567	15.13	16.875	18.28	0.088203
MPHOSPH8	1461	5645	736	10.985	16.29	13.03	0.703968
ANKRD12	1213	5889	767	12.64	15.18	14.88	0.0759303
MICAL3	1347	5948	557	10.42	13.155	11.45	0.478233
NOP14	1195	6199	460	11.35	13.88	8.101	0.487462
NFKB2	1506	6022	323	0	14.96	18.42	0.072349
LCP2	1067	5978	812	10.7145	15.14	12.599	0.354372
PAM	1335	5893	602	15.24	16.99	19.95	0.0100707
TM9SF3	1531	6027	295	20.6	24.45	40	0.0940568
MANBA	1273	6349	242	5.031	11.88	18.28	0.0389806
POLG	863	6374	629	8.9985	15.095	2.3705	0.83283
WDFY3	1208	6374	279	16.41	17.47	22.35	0.0651519
ABCC1	512	6277	1082	0	10.092	11.762	0.12581
NUP88	2170	5367	317	16.42	16.11	24.5575	0.200998
GAS7	2251	5302	297	12.04	16.255	0	0.967198
CDK5RAP2	1144	6114	606	10.82	13.495	12.15	0.327241
CLMN	1301	5984	560	10.805	13.02	15.815	0.116755
MBTPS1	1646	5596	590	13.04	17.1	31.5	0.0121786
SACS	1465	5640	744	13.755	16.55	15.39	0.260001
PKD2	1229	6365	268	17.905	19.625	11.18	0.790481
WDR59	1563	5653	630	15.16	17.88	14.64	0.350294
PRKCD	1795	5712	338	0	15.165	14.98	0.256161
FBXO18	1011	5916	936	7.843	11.4	13.53	0.217284
LIG1	912	6175	770	7.3435	12.24	9.927	0.443489
AP3B1	1432	5912	496	16.74	17.96	17.27	0.284431
HSPG2	1433	6083	340	12.66	14.1	15.31	0.183505
MAPK6	1158	6351	341	14.83	17.365	18.95	0.185315
MAML3	1248	6319	295	0	12.69	0	0.872357
BAZ1A	1068	6123	673	11.862	18.83	28.3	0.0725717
CHD3	2267	5284	295	14.15	15.865	12.92	0.509178
ALS2CL	1758	5753	338	8.5845	11.695	2.839	0.648874
PTPN23	1772	5743	331	13.92	15.29	23.8	0.00672467
DSP	658	6104	1091	13.58	14.65	11.33	0.502723
RUNX1	997	6281	577	21	27.75	40	0.056662
FKBP15	1143	6123	598	3.217	11.24	15.025	0.328497
PLCB2	1346	6214	272	13.33	15.46	1.4225	0.564427
SMTN	1444	5875	546	15.125	19.51	13.925	0.83266
NUP93	1428	5806	622	18.11	21.1	16.215	0.562067
NBEAL2	1761	5750	336	5.007	14.48	15.4	0.210606
HSPH1	1467	5598	791	11.68	15.27	20.555	0.250054
FAM193A	1198	6192	463	14.55	20.3	20.145	0.182572
CYFIP2	1102	6010	752	13.905	19.98	18.54	0.43378
CTNNA1	1106	6028	726	17.86	22.5	25.35	0.37728
SPIRE1	1170	5940	759	11.13	17.33	7.756	0.573188
EIF4A1	2271	5275	299	13.84	13.98	0	0.928026
ERBB3	384	6542	945	9.0745	15.79	14.28	0.27323
PHKB	1202	5934	722	14.89	17.22	17.03	0.184851
NDN	1172	6288	373	0	11.92	6.2845	0.421859
WDR11	1426	6037	391	8.4375	16.585	15.4	0.168199
CCDC88B	626	6662	576	9.516	11.69	11.6	0.266347
DENND5A	1195	6290	367	16.77	21.5	21.5	0.256064
PPP3CA	1276	6351	235	19.72	21.5	24.64	0.22789
PTPRF	922	6336	611	13.2	14.755	14.8	0.267768
TTC37	1388	5901	554	10.17	15.64	15.51	0.154587
DENND4C	1895	5379	578	14.365	15.045	18.06	0.124125
DHX30	1778	5732	337	11.565	15.505	13.96	0.425494
KIAA1598	1449	6058	348	13.4	15.48	0	0.927669
PCM1	2259	4805	682	15.345	17	20.62	0.0326254
INO80	1334	6214	280	16.18	20.5	33	0.218268
MYO5C	1160	6347	345	13.02	16.97	0	0.715625
NPC1	1205	6012	648	2.908	15.275	16.24	0.136816
SERPINA3	1304	5992	550	6	8.298	11.37	0.099825
ABCA2	1124	6043	693	4.741	10.985	13.71	0.225542
MAPK8IP3	688	6122	1053	0	12.84	0.39	0.307474
IQGAP2	1438	5901	503	12.555	16.785	24.85	0.0494327
KIAA0368	1154	6132	579	12.475	18.455	15.48	0.30944
NEDD4L	1880	5582	361	16.57	21.9	26	0.179858
NFATC1	1921	5493	375	0.037	8.816	6.191	0.376369
CHST15	1411	6038	406	5.725	17.73		0.376369
SPTBN2	485	6534	850	13.3	16.285	12.39	0.527016
DSC2	1482	5849	526	12.48	14.9	16.3	0.308308
GEMIN4	2096	5389	362	0.445	8.146	15.7	0.00849493
CIT	547	6520	800	16.41	18.855	19.84	0.0501486
RABEP1	2166	5370	320	13.265	19.85	14.605	0.566387
PDS5B	1521	5556	763	23.1	22.4	12.905	0.943302
NFIB	1853	5352	615	17.58	21.7	13.06	0.699567
NEBL	1020	6042	803	14.41	15.77	16.885	0.134496
TBP	1567	5821	443	0	0	19.515	0.0214196
IKZF2	687	6628	525	15.385	18.84	20.7	0.17594
RERE	1435	5981	417	13.265	20.55	19.91	0.270358
IRS1	774	6602	468	4.636	14.09	6.5885	0.458229
PLK2	1316	5962	552	16.025	19.025	19.3	0.286579
TMEM175	1198	6164	482	3.488	8.627	12.29	0.1766
PKD1	667	6134	1063	0.2605	6.241	3.125	0.38147
PDZD8	1447	6062	347	8.5615	11.95	5.48	0.63316
FUK	1481	5726	641	2.213	12.67	13.58	0.673096
EEF2	1259	6131	460	15.82	18.485	18.99	0.238587
MEF2C	1426	5899	518	12.64	20.7	35	0.0281978
PELP1	2136	5381	342	10.89	9.601	12.66	0.157965
PTPRE	1409	6025	412	13.25	16.445	19.15	0.14226
TYRO3	1338	6210	274	13.085	14.83	13.26	0.222883
AQR	1287	6241	305	16.94	20.8	22.245	0.140394
TUBGCP2	1424	6000	413	7.0405	13.04	0	0.747298
AKAP6	1079	6131	649	7.589	13.14	22.275	0.132054
BCL9L	1381	5958	504	14.865	15.6	16.39	0.44239
KARS	1573	5655	616	17.53	20.6	29.25	0.156993
RANBP6	1809	5357	647	13.37	14.02	14.715	0.140504
CBL	1392	5959	487	13.48	16.39	16.6	0.103763
CROCC	1388	6087	377	4.0465	12.29	14.755	0.209992
MSR1	2256	4802	682	9.336	12.46	14.56	0.0760835
KDM6B	2273	5277	296	11.805	12.16	10.68	0.660752
ABCA7	1310	6053	478	3.359	10.7	1.4805	0.688625
ABCA1	1187	6121	553	15.85	17.845	19.175	0.305941
ULK2	1853	5517	481	16.355	20.4	13.53	0.617754
CMYA5	1430	5911	502	11.75	11.85	8.573	0.706475
RBL2	1355	5843	651	18.81	21.75	16.045	0.745036
CNTROB	2266	5285	295	11.81	16.67	27.77	0.129572
SMC3	1464	6047	342	18.16	18.65	23	0.285396
RUSC2	1324	5847	696	12.93	13.71	14.76	0.197806
UNC13B	1321	5877	669	16.565	19.955	26.8	0.0362356
LAMC3	1166	6093	601	0	10.87	6.287	0.328345
WDR36	1325	5874	636	12.28	16.38	15.95	0.405697
CTDP1	1921	5493	375	6.939	12.445	2.653	0.695508
DOCK1	1405	6031	409	10.23	15.09	15.175	0.204677
ELL2	1381	5897	562	15.175	17.17	19.845	0.253882
SMC2	1184	6122	556	17.695	18.5	13.2	0.859927
DOPEY1	1388	5995	438	13.8	17.15	12.19	0.632129
TMEM2	1214	6134	507	15.06	15.82	18.93	0.0694607
FYCO1	1743	5762	347	5.926	9.911	11.12	0.296287
HR	2313	4771	655	8.9695	10.955	9.641	0.360871
RANBP3	1085	6249	528	5.018	20.6	5.54	0.838751
PTCH1	1218	6098	541	11.995	19.19	7.8475	0.617334
ARAP1	671	6307	886	12.79	15.035	15.43	0.295971
ARHGAP5	1085	6132	641	11.453	14.845	15.54	0.292862
FBLN2	1500	5821	539	12.37	13.935	13.5	0.433755
RAD50	1214	5938	702	19.87	19.7	12.41	0.892025
GOLGA4	1601	5842	415	12.52	14.59	22.2	0.0245592
TCF4	1876	5588	361	18.52	21.1	20.45	0.195025
RHOT1	930	6115	813	14.57	13.95	9.064	0.90896
CD109	1208	6133	500	11.09	12.98	10.56	0.484033
CUL5	1379	5966	479	14.925	21.9	13.52	0.700295
SIDT2	1422	5942	469	16.52	17.4	9.9755	0.718358
NOTCH4	525	6286	1055	11.85	13.6	13.23	0.302071
NCOA7	1465	5913	470	14.515	18.915	15.61	0.5
FRMD4B	1587	5837	411	14.71	17.11	16.995	0.428163
QSER1	864	6473	530	14.53	15.25	15.04	0.289351
SYNE2	1342	6024	501	10.054	10.57	10.82	0.18622
DNAH1	1815	5699	329	11.63	14.37	0	0.881521
SMCHD1	1197	5854	814	14.41	15.135	12.84	0.451126
NKTR	1680	5806	370	15.98	17.06	15.565	0.45742
FNIP1	1210	5942	698	20.195	21.95	16.34	0.616724
MAN2A1	1328	5872	634	13.98	15.745	23.5	0.0548663
COL12A1	1228	6129	484	15.785	17.16	20.4	0.132918
EPHA2	1386	6045	417	19.545	21.85	12.7	0.834083
RNF31	1086	6173	595	14.23	14.46	14.695	0.233498
EXOC6	1529	6022	298	14.83	17.87	10.0885	0.633743
GBF1	1508	6025	318	18.36	18.695	12.805	0.911399
MYO18A	802	6150	917	12.96	17.7	0	0.871766
PPL	636	6161	1066	6.5445	13.27	8.465	0.516247
FAM13A	1241	6352	269	15	14.295	29.25	0.00672537
IFNAR1	931	6325	613	13.12	13.38	20.33	0.0439995
ANK2	1288	6327	250	8.823	14.24	18.01	0.105061
LRP6	624	6071	1156	14.83	20.1	20.3	0.297996
C2CD3	725	6305	837	12.835	14.16	11.75	0.374192
FRY	1503	5567	768	16.08	18.555	16.455	0.521974
ADAM19	1105	6003	755	13.09	13.67	15.27	0.191653
RALGDS	1162	6089	610	13.775	14.85	13.07	0.545381
MOV10	1173	6211	456	14.33	14.84	5.34	0.652651
DNMBP	1525	6010	314	12.48	16.56	19.02	0.354676
LMBRD1	1109	6184	553	13.02	16.735	22.4	0.06272
DPYD	1212	6232	415	14.265	16.61	18.015	0.115181
POLK	1436	5903	502	12.46	14.745	24.49	0.14046
ZNF646	446	6332	1092	10.73	12.49	2.1765	0.569473
RYR1	623	6176	1067	10.635	12.82	14.48	0.081526
CAMSAP1	1157	6068	638	10.68	12.9	12.145	0.205997
LARP4B	1068	5883	899	17.58	19.53	13.17	0.644414
ERCC6	1131	6266	450	13.0315	17.99	19.86	0.468796
ZNF469	1640	5573	614	6.8355	9.585	7.423	0.687827
ME2	1848	5606	353	13.62	18.455	31.1	0.0991935
ILF3	729	6406	731	16.415	16.025	0	0.772289
FLNB	1750	5753	344	15.84	18.45	20.3	0.292824
ALPK1	1286	6331	249	11.22	13.74	0	0.974713
DLG4	2251	5288	308	6.795	15.24	34.7	0.0171612
PIGO	1329	5867	671	10.3	14.105	15.99	0.127085
DNMT1	753	6415	699	14.52	15.425	5.89	0.704181
ZNF609	1035	6456	376	15.025	17.095	10.14	0.574555
RAB11FIP1	1353	5162	1303	8.827	11.31	14.04	0.122777
SNX19	1364	5975	493	8.365	13.05	25.135	0.119444
ZDHHC8	1300	5968	597	13.075	15.955	12.9405	0.437773
LRP1	387	6595	887	15.12	15.445	15.65	0.200286
RABGAP1	1125	6119	615	17.48	19.71	19.88	0.206815
ARSB	1429	5917	498	9.187	15.87	36	0.04602
RAI1	2079	5408	361	10.557	13.015	12.25	0.449386
PHF2	1208	6108	541	14.07	15.64	15.96	0.175913
SETD5	1487	5810	554	16.94	18	18.26	0.511386
ARHGEF10	2123	4881	697	7.699	11.68	4.407	0.621696
TBC1D9	1235	6338	289	6.135	15.47	9.875	0.638515
ZBTB40	1433	6093	331	12.18	15.02	15.755	0.166417
KIF11	1523	6031	295	11.215	17.9	19.78	0.152373
PDGFRA	826	6512	529	13.805	16.735	19.54	0.0490993
AFF4	1214	5933	705	17.55	17.8	21.2	0.0750262
MTHFD1L	1512	5903	427	21	19.21	6.095	0.915881
TACC2	1409	6038	405	12.04	11.74	2.648	0.795963
FCGBP	681	6163	1020	5.1555	7.3655	8.165	0.116366
GJA1	1498	5904	444	11.425	14.68	9.269	0.443326
C2CD2L	1385	5960	495	10.03	11.515	15.74	0.330501
ITGAE	2120	5400	336	9.337	10.34	5.115	0.796729
WHSC1L1	1302	5178	1341	16.82	20.2	26	0.0653231
PLOD1	1381	6046	426	0.7575	14.68	13.15	0.363092
AKNA	1135	6125	606	9.1315	9.947	12.03	0.264796
KIF1B	1401	6014	427	14.58	17.765	19.98	0.141026
SLC12A6	1274	6247	313	17.765	18.86	23	0.318871
GTPBP1	1505	5836	523	18.09	20.5	17.68	0.653225
AHDC1	1406	6114	338	12.975	15.265	14.33	0.428164
HERC2	1218	6288	325	14.815	15.715	14.9	0.508768
PTPRM	1216	5886	764	17.25	16.995	18.57	0.340705
WTAP	1579	5861	396	17	18.005	25.35	0.13577
XYLT1	512	6277	1082	13.69	16.04	13.07	0.509262
AHNAK	612	6672	581	10.0905	9.552	8.168	0.461809
EP300	1573	5798	493	19.5	20.35	19.7	0.56323
EFTUD2	888	6131	832	17.44	19.03	21.2	0.0848449
DMXL1	1282	5901	660	15.39	17.24	13.21	0.932433
MYO6	1234	6111	494	20.33	21.05	14.42	0.754938
SEC24D	1285	6312	260	15.9	16.55	15.285	0.532509
ABCC4	1243	5662	954	13.62	14.84	12.455	0.506737
LIMCH1	1133	6344	383	16.84	16.17	19.085	0.312535
RANBP2	352	6899	617	14.65	15.24	14.8	0.402195
PARD3	943	6123	796	16.98	19.115	18.31	0.425225
MAP1A	1291	6259	286	9.688	10.46	10.791	0.279495
ZNF33A	919	6184	765	4.774	7.312	10.29	0.197023
PRR12	875	6170	815	8.106	9.0545	10.805	0.125666
SASH1	1515	5900	427	11.89	15.55	7.885	0.592635
GAPVD1	1131	6110	624	20.95	22.45	12.02	0.8015
NPR2	1327	5844	696	18.74	16.51	9.635	0.751628
PRDM2	1384	6060	403	11.18	12.68	8.5225	0.799059
SKIV2L2	1219	6014	599	22.2	23.5	0	0.993114
SMG6	2112	5417	330	14.15	14.22	6.494	0.369345
PIK3R1	1452	5892	483	30.6	29.7	17.08	0.854858
REXO1	1332	6054	457	1.859	4.882	5.465	0.575302
MGAT1	1014	5963	880	14.9	15.36	19.38	0.241795
CUL3	777	6597	467	18.35	22.9	23.1	0.223192
IGSF3	1102	6209	525	7.084	13.115	17.57	0.0961574
A2M	560	6094	1204	6.3365	11.36	10.09	0.44446
SORBS1	1510	6049	293	13.86	14.8	0	0.749754
CHD8	1058	6187	615	17.395	18.45	22.6	0.11721
SHROOM3	1048	6403	415	9.562	10.56	12.76	0.144355
ZNF91	529	6577	759	7.6965	8.3965	10.48	0.100054
TNKS	2206	4825	700	17.69	19.155	18.37	0.487942
TRIM5	1235	6261	356	5.27	8.6	2.631	0.71018
SLC12A2	1225	5935	689	15.31	17.59	15.19	0.74742
WDR47	1188	6208	449	21.6	22.3	17.155	0.947167
TPP2	1207	5683	974	15.655	17.39	16.205	0.550526
BICD2	1200	6113	544	17.795	18.18	11.72	0.692386
PHLDB1	1383	5954	507	12.23	15.55	16.42	0.288779
DMXL2	1161	6353	336	16.605	17.805	19.875	0.27354
KIAA0556	470	6313	1085	9.257	11.655	10.1235	0.515323
PSD3	2279	4799	668	14.33	15.16	16.51	0.143118
ANKS6	1207	6101	545	12.18	11.37	19.78	0.0366398
FUCA2	1475	5936	441	17.05	18.675	35	0.174124
ZMIZ1	1251	6121	488	17.07	19.99	28.8	0.400262
FREM2	1629	5461	720	11.9	13.46	15.58	0.280829
GLB1	1571	5845	444	11.448	14.165	2.8855	0.575657
ENTPD1	1516	6040	297	10.1	13.675	9.125	0.694135
CHL1	1499	5815	515	15.81	15.625	2.563	0.883323
CELSR1	1677	5677	471	10.68	12.84	0.3885	0.943982
MICAL2	1131	6308	418	13.68	15.9	0	0.937702
IDE	1523	6031	295	16.64	17.705	15.675	0.608008
EXTL3	2185	4853	706	9.3015	11.86	13.345	0.383323
PKN1	628	6473	763	6.543	12.81	10.99	0.391832
VPS13A	1212	6143	499	16.07	16.05	16.18	0.252423
RNF219	1387	5602	846	13.11	14.845	16.08	0.368459
VWF	514	6088	1261	12.245	11.905	5.586	0.722386
FHDC1	1346	6219	282	8.275	11.43	25.9	0.00647693
EP400	647	6423	788	9.3975	9.8925	6.5255	0.549302
NUP210	1504	5828	528	7.0025	8.209	10.64	0.335064
NCAPD3	1367	5955	503	11.605	14.405	14.79	0.0782894
IL10RA	1406	5941	493	12.64	10.97	16.775	0.0359149
RCBTB2	1677	5384	675	15.225	16.295	18.48	0.262252
CDC42BPB	1253	5995	596	13.22	13.93	17.23	0.136376
BAHD1	1351	6213	268	7.085	14.345	0	0.639129
SNAPC4	1151	6058	652	7.942	9.241	14.41	0.100565
MYBBP1A	2135	5381	341	11.3	11.48	0	0.871309
CYB5R4	1395	5988	438	11.92	16.11	0	0.839355
LRRK1	870	6287	703	11.915	12.405	15.39	0.117344
ATP10A	1192	6285	359	8.137	11.775	7.207	0.400904
BDP1	1439	5904	492	10.97	11.53	13.43	0.16131
COL6A1	1059	6163	631	10.312	9.4885	18.71	0.00702562
UBR1	1308	6248	280	14.43	16.895	21.25	0.256547
MAGI1	1636	5827	381	13.71	15.37	20.3	0.12144
MFHAS1	2203	4829	701	13.44	13.31	13.54	0.332921
ZEB1	976	6097	792	13.44	14.67	14.63	0.398342
CRTAC1	1530	6013	309	8.444	16.53	40	0.094235
CCDC80	514	6147	1203	17.85	16.31	15.955	0.188411
MAP1B	1444	5898	493	9.86	11.27	10.8	0.385464
FRG1	1479	6016	279	16.34	16.97	15.365	0.469288
STARD13	1531	5558	753	5.3465	15.59	16.08	0.195496
SLMAP	1753	5754	336	12.18	17.685	15.68	0.370165
KDR	829	6525	513	12.39	14.89	18.865	0.145391
TSR1	2116	5409	332	13.565	13.75	13.36	0.516516
MLH3	1355	6001	508	9.532	12.675	0.122	0.921452
SBF1	1664	5683	459	15.355	15.95	0	0.869773
CLASP2	1570	5850	438	19.21	22.9	19.23	0.599871
WRAP53	2279	5267	295	13.355	14.83	40	0.225017
ARID4A	1252	6097	518	16.16	18	15.9	0.681289
FAM135A	1146	6164	534	14.425	15.47	13.46	0.556696
ARAP3	1108	6030	725	14.65	17.41	18.69	0.226399
TNC	1136	6131	599	11.285	13.085	13.62	0.308877
SEC23IP	1445	6046	364	17.46	16.495	15.23	0.44961
GPHN	1381	6001	479	24.7	20.75	16.08	0.849243
CEP164	1423	5945	469	9.3785	9.75	12.215	0.2629
ERBB2	784	5982	1098	12.54	13.1	12.7	0.226413
TP53BP1	1296	6255	286	15.79	17.185	15.25	0.567091
DOCK6	742	6420	702	9.145	13.99	17.435	0.213994
SLC12A4	1482	5729	642	10.43	15.295	23.305	0.0831239
GCN1L1	545	6520	801	15.045	16.36	17.155	0.41486
PLA2G4F	1327	6222	279	4.8185	9.487		0.41486
TLE1	1214	6147	495	19.73	21.55	29.5	0.353876
SATB1	1523	5861	474	14.04	14.97	7.667	0.766528
NOTCH1	1148	6046	666	17.49	19.535	18.98	0.253964
GTF3C1	478	6306	1083	14.54	15.145	13.31	0.583656
PLEKHG3	1349	6006	512	12.67	12.425	7.945	0.529727
TMF1	1597	5835	408	14.87	15.69	22.9	0.115886
CSF1R	1084	6014	768	12.77	10.5	8.531	0.448448
SRCAP	443	6318	1108	8.152	11.035	11.855	0.367738
NOL8	1202	6115	541	13.52	11.675	0.009	0.945947
ANO10	1705	5797	352	16.26	19.87	21.445	0.36089
ERAP2	1375	5890	572	7.6375	12.22	16.82	0.129459
DVL2	2253	5287	308	14.825	18.69	19.18	0.325982
UBE4A	1399	5937	506	17.605	22.05	29	0.181129
WDR81	2100	5401	352	9.501	13.775	14.52	0.594663
FNDC3A	1683	5404	681	14.955	14.91	16.69	0.154993
GLG1	1557	5669	619	20.3	20.8	25.55	0.182615
AKAP13	896	6405	569	15.4	14.615	11.805	0.897567
USP48	1437	6080	338	16.205	17.51	20.9	0.318807
PIGG	1198	6164	482	11.199	12.77	5.105	0.776083
IPO7	1192	6282	377	17.725	18.485	22.935	0.0747098
MYH14	876	6169	813	16.82	15.58	10.2255	0.636256
DAAM1	1268	6075	524	17.75	19.04	22.35	0.0536351
MRVI1	1172	6290	390	16.21	19.055	9.7795	0.889088
TLR2	1351	6225	270	10.07	11.595	0	0.930687
CAMTA2	2143	5382	333	17.11	18.37	26.5	0.0286473
TP53	2282	5260	296	22.5	22.4	22.25	0.430778
COL5A3	772	6415	680	11.36	12.39	14.02	0.295414
PDCD4	1467	6039	346	16.5	16.385		0.295414
PHF3	818	6302	738	9.101	11.09	11.52	0.131545
TTC17	843	6540	475	18.465	18.09	18.9	0.301516
CDCA2	2291	4780	652	10.49	10.39	9.932	0.650098
SMARCAL1	701	6648	500	14.78	12.82	6.745	0.818688
ENTPD4	2317	4758	647	2.5365	14.88	18.595	0.252777
DCHS1	1216	6271	368	13.805	14.44	0.427	0.981603
INTS6	1659	5426	703	19.385	19.43	8.535	0.925724
TRERF1	522	6269	1077	16.885	17.57	15.96	0.472207
INPP5F	1447	6047	361	17.32	18.81	15.935	0.694744
COL17A1	1517	6010	322	13.79	11.91	12.97	0.296276
TNKS1BP1	608	6722	532	13.57	11.26	14.63	0.216966
PHRF1	1284	6176	374	8.979	10.34	9.117	0.31314
NYNRIN	1084	6170	602	12.41	11.52	10.75	0.508603
KIAA1109	1268	6328	263	19.355	19.77	22.6	0.0332925
DNM2	735	6409	722	12.9	16.485	27.1	0.144383
WWC1	1092	5969	796	17.3	17.765	15.67	0.429622
KIAA0232	1193	6218	445	14.905	17.2	15.06	0.611727
DLG5	1232	6130	503	13.145	16.885	15.78	0.40557
FRMD4A	1013	5978	875	19.64	20.75	0	0.967691
AASDH	868	6517	480	8.7515	16.78	7.412	0.585878
PLEKHG4	1477	5736	641	12.09	13.8	17.84	0.213912
DOCK8	1795	5348	653	16.795	17.34	18.62	0.346523
PABPC3	1462	5651	739	13.115	13.11	11.1355	0.694847
ATM	1390	5957	476	20.22	21.1	20.9	0.181481
PTPN13	1215	6362	278	13.165	14.79	16.33	0.272928
DSE	1543	5863	419	12.82	14.16	16.32	0.606775
ARHGAP21	1021	6051	789	15.685	16.765	13.71	0.756783
RBMXL1	1199	6217	443	14.71	15.4	15.845	0.651343
THBS2	1580	5823	421	12.24	13.27	16.13	0.0688581
IL16	923	6423	522	8.868	10.71	14.985	0.2595
MAP2K3	1748	5570	530	12.79	14.3	17.005	0.188679
ATP9B	1920	5495	376	17.125	17.33	0	0.986864
KIAA0020	1797	5360	643	18.29	16.945	12.575	0.834069
DALRD3	1792	5724	326	12.685	15.335	0	0.865077
WRN	2071	4931	758	11.28	11.29	10.002	0.398377
ANKRD50	1277	6323	255	14.635	15.61	14.33	0.555975
KIF2A	1361	5941	529	18.685	18.77	18.77	0.639302
DYNC2H1	1226	6036	583	14.445	17.76	15.855	0.583084
ABL1	1169	6089	601	10.18	12.59	17.41	0.210683
HIVEP2	1464	5941	451	13.16	12.84	13.52	0.214246
ZFHX3	1543	5683	610	11.4	11.715	3.8435	0.925733
LONP2	1215	5923	719	20.475	21.7	6.033	0.966616
NOL6	1417	5797	653	13.725	14.1	16.99	0.348861
PIK3AP1	1527	6032	295	11.83	12.88	0	0.835694
HJURP	862	6510	455	11.43	12.31	0	0.974686
MDC1	522	6240	1103	11.43	10.945	11.47	0.373827
INF2	1243	5977	632	10.755	12.125	12.2	0.400045
KIFC3	1443	5792	620	16.93	16.49	17.455	0.38343
EPB41L4B	1169	6125	572	14.04	17.52	18.385	0.478018
HDLBP	914	6424	465	16.63	16.945	15.37	0.64905
CCNL2	1370	6009	460	16.13	15.02	2.0475	0.805221
NNMT	1439	5929	450	11.31	9.4645	11.15	0.245112
HIPK3	861	6463	541	12.59	14.605	10.48	0.765607
GUF1	1090	6393	379	18.92	19.13	21.685	0.256001
BIRC6	298	6736	830	17.63	19.46	19.44	0.336204
OXSR1	1609	5833	418	23.2	21.85	29.45	0.0751161
SYNE1	1512	5914	422	13.68	13.86	15.72	0.0998995
MYO1F	917	6341	606	12.29	15.78	12.63	0.5292
UGGT2	1235	5665	959	18.84	17.03	12.21	0.807989
RAPGEF2	1374	6192	271	18.505	20.75	12.805	0.868306
ZNF407	1888	5529	382	11.41	11.385	12.905	0.59222
XAF1	2226	5314	310	7.374	8.652	2.907	0.5
RC3H2	1124	6123	611	21.6	19.13	18.67	0.778104
NFAT5	1481	5728	641	15.225	15.14	9.015	0.80443
FANCI	864	6374	628	16.98	13.57	10.321	0.75677
SKI	1370	6009	460	0.2835	1.254	6.34	0.676757
NEO1	968	6445	455	18.72	19.055	18.545	0.5
RNF43	590	6097	1174	32	40	10.07	0.998586
TSHZ1	1895	5525	378	2.1615	2.153	2.2075	0.560317
BCLAF1	1431	5947	479	15.825	15.275	16.17	0.466181
COL11A1	1202	6230	421	17.48	18.45	18.8	0.297163
HSPA8	1383	5971	481	18.65	17.84	24.6	0.0873313
STC1	2307	4763	655	14.72	13.12	0	0.700501
MAP2K7	995	6303	564	23.1	20.05	16.45	0.668919
MATR3	1111	6014	739	17	16.29	8.825	0.814113
TEP1	1048	6177	634	12.77	12.715	15.44	0.190643
SH3RF1	1382	6159	290	14.335	14.83	11.2055	0.672518
ELP2	1586	5784	484	10.17	14.48	19.145	0.104581
C10orf2	1514	6016	319	16.09	15.41	23.4	0.170877
TNK1	2263	5278	306	11.81	10.229		0.170877
PDE4A	748	6403	715	10.805	13.95	14.01	0.434829
SLFN11	951	6105	797	3.608	9.563	7.929	0.30161
HYOU1	1383	5961	498	14.05	19.38	19.38	0.5
TCF12	1160	6373	321	25.15	24.7	12.25	0.897541
PDGFRB	1079	6023	764	13.865	12.4	5.285	0.762515
AKAP12	1509	5897	441	9.953	10.95	12.695	0.277161
COL5A1	1171	6075	616	14.58	14.77	13.9	0.716763
SMYD4	2103	5401	349	13.015	8.3685	11.21	0.382879
LMO7	1411	5580	840	19.125	18.335	21.5	0.0681785
ATG2B	1294	6000	554	20.3	18.56	17.75	0.599295
PER3	1439	5959	434	10.58	12.07	5.836	0.773528
PDPR	1473	5735	641	19.79	18.25	18.62	0.309762
NFKB1	1270	6353	241	14.68	14.12	10.4	0.578952
GOLGA3	651	6432	775	12.9	13.5	15.82	0.28945
METTL3	1065	6181	616	23.2	24.4	14.795	0.996168
NCKAP1L	402	6602	862	17.66	16.96	20.35	0.229422
IFNGR1	1427	5946	481	14.04	12.59	9.961	0.659435
MEX3C	1858	5595	353	15.16	15.79	13.14	0.67264
STK11IP	728	6617	503	10.417	12.2	18.005	0.110376
THBS1	1342	6221	267	18.695	19.41	0	0.906884
HECTD1	1075	6142	646	15.425	16.82	16.885	0.654324
SECISBP2	1195	6142	525	10.74	12.38	4.573	0.554058
PLAA	1743	5459	556	12.515	13.81	20.96	0.065649
HDAC4	877	6472	462	15.015	14.345	0	0.811007
SPRED1	1334	6225	271	15.1	18.08	15.3	0.5
ZNF462	1178	6113	572	15.505	15.27	14.64	0.621102
RAP1GAP	1440	6080	336	10.1	16.57	9.612	0.691751
CDKN2A	1511	5008	454	27.6	24.9	37	0.182366
FAM160A2	1224	6264	365	15.41	14.99	8.735	0.918244
DNAH2	2272	5278	293	13.805	12.38	7.62	0.668773
DDHD1	1153	6148	568	14.77	16.155	6.919	0.759935
AHNAK2	1248	5978	624	9.765	8.784	8.1565	0.497006
SBF2	1184	6292	374	21.4	20.1	20.4	0.433959
EGR1	1103	6024	737	16.55	16.14	18.24	0.169694
DLC1	2225	4820	688	12.91	13.71	12.935	0.61352
LRCH1	1681	5399	697	19.96	17.02	17.2	0.467024
ITSN1	942	6322	603	19.795	18.96	15.965	0.780065
PAPLN	1360	6013	490	10.07	10.9	18.49	0.0185751
MLPH	857	6498	464	5.026	6.704	9.803	0.217124
JMY	1434	5907	505	19.38	16.69	10.8585	0.660548
USP20	1169	6094	596	11.12	13.98	24.2	0.11799
ZNF532	1866	5589	369	12.055	13.44	8.7235	0.678366
NLRP1	2177	5361	317	8.466	10.19	7.76	0.65034
ADCY7	1316	5871	661	9.442	12.235	6.7565	0.6911
GAK	1198	6164	482	14.15	14.965	12.19	0.691713
THOP1	1293	6103	454	13.13	12.335	13.09	0.556624
NFATC3	1486	5731	637	15.09	16.03	17.21	0.523197
UBR4	1427	6074	356	21.3	18.55	19.6	0.709654
FLT1	1432	5645	779	13.63	12.81	4.77	0.891205
PTGFRN	1087	6200	551	12.4565	15.21	16.24	0.457262
DIP2A	1051	6161	639	17.25	17.22	17.58	0.519026
UACA	969	6464	435	15.44	15.15	14.8	0.510171
CELSR2	1180	6199	466	11.255	13.72	12.96	0.709641
DST	553	6364	949	15.8	15.405	15.76	0.659921
MUC16	870	6355	637	4.0685	4.137	1.851	0.962715
PCDH18	1261	6332	267	14.55	13.88	9.625	0.578343
SH3PXD2A	1512	6021	315	13.235	14.91	34.15	0.0820799
BBS7	1266	6328	264	16.77	17.84	21.6	0.5
MAP4	1770	5742	334	12.25	12.445	17.575	0.115259
ITPRIP	1521	6015	311	1.1575	5.7	7.5595	0.41269
DHX37	608	6470	786	11.18	11.72	15.2	0.293525
BRWD1	1094	6130	602	17.485	16.27	16.29	0.547535
CUX1	355	5507	2001	19.3	15.97	15.56	0.457936
TGIF1	1186	5833	840	31.25	20.9	16.27	0.830136
ZCCHC11	1024	6340	499	18.965	17.44	20.695	0.438885
TLE4	1219	6144	494	17.39	18.565	19.36	0.425361
ARHGEF17	693	6300	873	11.99	13.8	12.36	0.42355
NPEPPS	737	6192	934	20.25	22.2	21.24	0.604332
ZNF644	1212	6210	439	13.1	12.49	14.51	0.286476
SPEN	1391	6043	416	10.945	12.51	9.892	0.903469
SMARCC2	382	6554	934	19.025	19.35	14.23	0.825292
LIG3	958	6086	805	18.74	20.7	13.95	0.869278
TSC22D1	1669	5411	707	9.742	11.935	13.52	0.526803
MCM3AP	1052	6160	639	13.13	11.5	16.19	0.229784
PLXNB1	1788	5724	333	13.75	13.69	14.375	0.514733
TRPM7	1176	6341	331	16.53	16.93	19.72	0.725932
ZNF33B	1006	6299	554	9.479	8.549	14.86	0.0655009
CCDC88C	1291	6000	558	6.5075	9.976	13.62	0.225317
RRP9	1814	5713	321	16.34	15.15	20.6	0.261001
ZZEF1	2123	5393	340	15.305	15.31	17.58	0.213076
TMEM181	1575	5859	403	16.105	10.597	22.5	0.211828
ZNF445	1715	5791	347	11.225	10.78	0.015	0.975832
MAP3K4	1590	5846	398	22.5	20.7	19.8	0.393508
LPIN2	1185	5850	829	18.7	18.16	11.0015	0.775438
PPIL4	1525	5898	420	17.25	15.265	25.2	0.346775
NFX1	1423	5793	650	12.59	13.16	5.823	0.752294
COL3A1	418	6761	685	18.42	17.54	16.49	0.704619
PCNT	1051	6161	639	8.478	7.33	9.056	0.543271
MPRIP	2117	5379	357	18.66	18.46	29.7	0.0738863
WAPAL	1471	6038	334	17.09	16.99	13.14	0.742774
TAF1C	1648	5589	594	10	11.055	3.9005	0.802213
PDIA3	1284	6266	288	15.14	15.585	10.97	0.909835
SVEP1	1166	6128	571	13.97	13.54	12.035	0.616436
CDAN1	1315	6241	274	14.76	16.305		0.616436
TBC1D1	1163	6318	386	17.17	12.12	11.645	0.492535
KAT2B	1540	5846	470	20.7	19.02	21.2	0.542452
FAM160B2	2312	4772	654	15.475	10.27	16.33	0.217467
SH3PXD2B	1041	5975	840	13.79	11.81	0	0.989196
ARHGAP32	1369	5948	512	10.695	13.525	16.43	0.15502
MAP2	641	6672	539	16.05	13.52	15.87	0.239325
WDR19	1160	6325	379	15.2	14.42	23.2	0.174836
MMP2	1394	5828	629	16.24	12.3	35	0.0157633
ZNF518B	1207	6238	414	12.63	13.41	17.52	0.189902
SYNJ1	975	6302	590	17.7	15.55	18.67	0.369548
TBC1D2	1207	6102	546	11.75	12.125	11.23	0.543535
INSR	1021	6287	552	13.72	13.6	5.625	0.863335
KIF1C	2149	5381	329	15.835	16.77	14.28	0.590725
SMAD2	1776	5663	414	24.65	25.1	19.78	0.78485
UTP20	584	6533	748	12.68	14.79	15.37	0.365537
DOCK2	1075	5975	805	15.55	16.69	12.81	0.772141
IGF2R	1580	5860	396	14.73	14.25	16.95	0.110698
GAS6	1189	5649	1019	14.36	12.73	8.826	0.749201
SORBS3	2319	4760	648	9.4845	12.905	11.86	0.540014
TULP4	1576	5862	399	18.7	16.85	21.5	0.328652
TCF7L2	1450	6035	362	19.95	19.62	15.47	0.810087
CTNNB1	1650	5829	380	19.12	18.46	17.1	0.753506
BMP1	2314	4769	655	17.565	17	21.1	0.284457
MAML1	1007	5960	883	10.177	9.827	7.063	0.570418
SON	922	6331	618	12.71	12.77	13.14	0.626975
FANCA	1626	5586	609	11.99	12.43	10.52	0.767029
SGSM2	2114	5408	335	14.01	13.115	35.5	0.00362317
AMPD3	1173	6287	391	24.05	15.52	18.885	0.627231
EPB41L3	1210	5886	766	19.67	17.205	14.14	0.865184
FYN	1541	5856	420	24.3	20.55	14.77	0.697842
COL18A1	1066	6164	626	10.795	10.31	0	0.857779
CHD6	198	5541	2127	16.285	18.555	15.37	0.645734
CDON	1386	5950	498	16.78	16.98	3.2225	0.788348
ZNF142	709	6628	511	14.895	13.815	13.135	0.670842
AFAP1L2	1449	6049	356	12.86	11.78	19.8	0.121687
COL6A3	854	6499	467	12.02	10.14	8.9575	0.855608
MIIP	1380	6046	427	10.2405	8.638	11.25	0.536773
L3MBTL2	1565	5801	497	17.675	16.19	22.05	0.141786
SETX	1164	6096	603	11.78	12.58	11.91	0.618845
AGRN	1370	6009	460	11.93	11.685	12.445	0.795098
NIN	1128	6136	601	14.01	13.08	13.76	0.482314
FCHSD1	1109	6030	725	13.03	15.33	22.5	0.0854111
UBA6	977	6491	394	15.42	14.195	16.05	0.467024
ZNF721	1198	6164	482	5.894	5.851	12.255	0.0357927
HDAC10	1664	5683	459	10.034	10.31	12.49	0.648139
KIAA1462	988	6090	788	11.05	11.605	15.37	0.108508
ODF2	1146	6097	620	15.55	17.1	15.83	0.701214
PHF10	1575	5820	423	22.045	18.67		0.701214
TBCK	1281	6343	240	15	16.16	17	0.578343
USP10	1648	5589	594	13.475	12.13	15.23	0.194947
BTRC	1513	6025	311	22.05	20.9	21.6	0.614425
USP24	1038	6325	502	14.95	18.52	19.36	0.472399
KIF15	1725	5787	342	15.69	15.705	19.08	0.22816
RIN3	1291	6009	547	11.88	8.299	10.023	0.441669
RPS6KA2	1587	5831	409	13.02	14.265	13.205	0.414808
DHX29	1213	6017	602	15.21	17.79	16.43	0.604067
TMX3	1901	5538	371	17.82	16.675		0.604067
LONP1	1105	6231	526	13.815	15.38	17.77	0.69865
ABR	2096	5389	362	20.7	17.18	16.54	0.432507
ADAM12	1396	6036	415	9.3805	9.9095	18.29	0.119485
WNK1	504	6041	1319	13.86	13.34	15.02	0.455093
MED16	1303	6055	483	15.92	15.02	0	0.958872
PRKCH	1287	6050	528	23.9	21	11.35	0.927946
SIPA1L1	1383	6008	473	16.47	14.85	13.315	0.841188
ACO1	1531	5722	600	19.49	20.3	25.35	0.176457
SLK	1514	6015	320	20.02	19.105	14.2335	0.802632
MAGI3	1165	6211	463	17.93	16.46	16.69	0.316408
MUC5B	1276	6196	367	4.284	4.171	4.017	0.755107
RFX7	1140	6386	323	13.9	13.415	13.595	0.612402
TET2	1295	6334	234	16.465	13.315	0.0035	0.990873
ARHGEF10L	1413	6074	362	17.88	16.56	11.511	0.844786
RGS12	1194	6204	453	13.67	13.715	16.97	0.397258
COL4A1	1158	5674	1030	15.19	13.975	12.42	0.762587
PIBF1	1425	5556	842	19.88	19.88	23.4	0.320873
CDH5	1474	5749	633	11.95	11.98	13.305	0.621165
PITPNM2	578	6487	800	18.745	16.025	5.959	0.779349
SH2D3C	1125	6100	640	12.183	11.515	10.06	0.450743
VAV2	1166	6081	615	17.945	16.93	11.2785	0.750668
ATP2A3	2124	5393	341	12.38	12.645	0	0.845597
SP100	800	6585	456	11.71	10.47	11.2	0.591525
HEATR5A	1079	6134	650	17.81	19.05	15.36	0.805005
RNF111	1115	6404	333	21.9	20.3	15.1765	0.861206
RBM26	1384	5606	846	20.1	19.48	22.1	0.282384
ANK3	1176	6230	455	16.17	16.015	20.95	0.0290908
TCF20	1602	5770	477	16.47	15.65	16.12	0.396369
NPHP4	1448	5947	440	9.264	7.8025	0	0.86747
FBLN1	1656	5712	469	15.71	15.295	14.425	0.754974
BPTF	477	6057	1336	13.935	11.985	15.135	0.140493
FNBP4	814	6584	467	21.9	17.09	13.365	0.78377
FOXRED2	1511	5835	519	14.97	15.245	14.604	0.743728
ITGAX	452	6330	1088	11.12	11.36	2.3045	0.849918
SEC16A	1147	6055	658	13.74	11.31	11.69	0.655356
CELSR3	1787	5717	337	16.18	15.76	0	0.928966
ITPR2	401	6176	1286	21.9	18.785	17.735	0.671203
ARAP2	1192	6305	367	16.755	15.44	13.03	0.556094
USP19	1787	5727	328	14.83	14.16	19.08	0.254341
ERBB2IP	1412	5927	500	18.5	18.34	16.08	0.726871
VLDLR	1801	5349	652	17.96	17.095	20.09	0.309313
TYK2	754	6411	702	11.29	11.61	12.85	0.672172
PLEKHA7	1045	6394	425	18.45	15.96	24.3	0.27764
EIF3A	1444	6054	359	15.79	15.54	14.32	0.405459
DSEL	1901	5543	367	17.74	17.155		0.405459
BTAF1	1524	6025	299	17.55	17.35	18.48	0.542123
MYO9B	579	6523	763	16.465	13.51	9.053	0.845284
ZC3H7B	1563	5797	505	16.19	15.62	15.04	0.475591
PCDH7	1219	6287	353	15.35	15.74	0	0.986112
ATXN7	1652	5815	381	14.375	16.21	16.915	0.577164
TOP2B	1539	5866	452	21.6	20.1	25.3	0.132444
PLCE1	1522	6034	293	15.195	15.57	14.19	0.605099
ATF7IP	609	6106	1135	23.6	19.18	24.6	0.311305
OBSCN	257	5517	2083	13.85	12.73	11.92	0.74313
SGK223	2196	4844	690	11.69	10.52	5.4755	0.827348
MICAL1	1545	5842	426	14.495	12.165	19.55	0.185401
PCSK7	1421	5944	469	14.835	12.92	3.483	0.87029
HERC1	1022	6454	390	20.485	21.25	25.75	0.272899
IMPDH2	1792	5724	326	19.75	17.755	6.83	0.727587
FLCN	2119	5379	356	20.5	18.49	15.63	0.787485
HSP90AA1	1270	6003	573	18.27	17.54	16.965	0.719274
DAB2IP	1139	6123	604	16.83	17.355	10.61	0.750047
DYRK1A	1002	6245	604	23.6	20.9	21	0.818143
TRAPPC10	1062	6170	625	11.26	13.145	16.96	0.358669
FOXP1	1613	5796	400	21.65	21.4	27.25	0.123395
PFAS	2248	5308	297	15.84	13.94	15.08	0.486441
NT5E	1428	5961	427	14.32	12.87	6.3415	0.815696
SCAP	1773	5744	329	17.08	17.47	12.55	0.737717
FAM120B	1573	5821	437	11.79	9.8225	5.6905	0.560321
RAPGEF1	1161	6088	612	17.26	16.52	6.6485	0.764641
MANEA	1500	5911	396	16.955	14.78	28.4	0.184985
AP4E1	1171	6342	335	19.34	13.61	9.046	0.909904
NFRKB	1359	5966	506	17.535	14.8	12.839	0.915891
WFS1	1203	6209	441	9.711	8.135	8.035	0.571665
ADD1	1199	6195	460	13.8715	18.985	17.06	0.643417
COG4	1483	5727	638	25.6	18.93	12.195	0.936665
CLU	2229	4816	688	13.155	11.405	15.9	0.411761
ACTA2	1528	5953	305	19.76	18.66	9.375	0.866055
ARIH2	1793	5724	325	24.1	19.56	22.105	0.443459
USP4	1787	5728	328	15.995	14.755	19.24	0.4123
CEP192	1167	5942	759	14.475	11.02	12.905	0.539594
NLRX1	1390	5955	495	13.76	13.82	12.065	0.868361
RBM5	1799	5717	328	20.3	20.5	0	0.952307
NUP160	807	6591	466	16.29	17.38	20.7	0.442381
USP28	1436	5936	449	22.4	21.8	19.7	0.723964
UTRN	1481	5930	440	14.51	15.095	17.465	0.258686
DSG2	1494	5850	515	11.185	9.027	13.37	0.140786
SRRM2	666	6139	1062	9.915	8.458	9.607	0.345319
XPO7	2311	4779	648	18.13	16.73	20	0.382552
BMS1	1006	6297	556	16.875	14.75	17.91	0.468231
NOTCH3	572	6491	804	17.115	15.845	12.63	0.831482
MYO9A	954	6453	459	18.12	18.295	17.93	0.648179
FBXW7	1351	6225	269	24.7	25.3	24.8	0.652543
FRYL	840	6605	424	18.78	17.93	15.89	0.885166
SMCR8	2027	5445	380	12.955	14.29	10.92	0.69564
NOTCH2	894	6227	727	21.2	21.3	12.145	0.967375
TIAM1	1020	6279	565	16.53	15.41	19.57	0.233173
MTUS1	2253	4812	678	13.835	11.71	10.67	0.754197
CD248	513	6571	784	12.113	12.2	9.0485	0.760048
THRAP3	1011	6325	529	22	18.13	14.77	0.946704
ARHGAP29	1225	6202	435	20.7	16.58	11.22	0.966105
LCP1	1690	5395	697	24.75	19.8	22.65	0.44879
STAB1	1812	5695	335	13.26	11.68	12.13	0.789439
ZNF236	1906	5513	375	14.61	14.47	14.33	0.744113
PDGFC	1369	6196	269	18.93	17.845	17.41	0.614952
FRMD6	1141	6141	586	21.3	18.44	19.055	0.604281
SMARCA2	1791	5363	648	21.1	18.97	15.86	0.99849
TBC1D9B	1004	5960	891	15.225	11.61	5.456	0.917832
ZCCHC6	1198	6163	500	16.02	15.11	24.4	0.040352
MAN2B2	1198	6211	446	12.72	8.287	18.12	0.19151
FLII	2028	5443	381	20.2	16.71	24.4	0.468455
MADD	816	6552	493	19.255	18.93	22.1	0.328834
SEC24C	1214	6166	483	21.15	18.65	16.47	0.789847
DPYSL2	2276	4791	658	18.76	19.765	10.612	0.941459
COL27A1	1136	6124	606	16.1	12.98	12.455	0.8693
LRIG1	1615	5841	392	16.595	11.22	12.025	0.672714
SLC39A6	1584	5787	486	20.515	14.65	14.98	0.768355
TLN2	1043	6448	375	20.565	16.465	14.72	0.706085
SYK	1199	6135	528	15.63	14.135	15.11	0.5
SEL1L3	1221	6260	380	18.4	14.605	7.505	0.915084
LRBA	1310	6270	273	20.4	19.67	22.2	0.298582
NOLC1	1509	6020	322	14.35	12.85	12.8795	0.523915
LTBP2	1364	5998	501	14.4	12.71	12.945	0.70292
CDKN1A	548	6300	1017	40	40	26.4	0.850699
TUBGCP6	1664	5683	459	14.745	13.44	12.92	0.414766
VPS39	1326	6226	277	21.2	16.57	12.75	0.677633
AGGF1	1431	5910	499	20.45	16.185	0	0.990663
UBA7	1802	5714	329	12.71	11.985	22.1	0.161099
PTPN21	1299	6012	539	16.855	16.09	15.57	0.784462
SMC5	1221	6119	514	19.49	17.52	25.5	0.233964
EIF4G3	1432	6079	340	18.785	18.7	17.72	0.70732
INADL	1051	6299	511	17.46	13.16	10.655	0.80249
ADAMTS1	1037	6262	556	18.265	14.465	20.2	0.189571
CD163	522	6109	1231	15.61	12.16	12.885	0.483199
ASPM	210	5571	2084	14.69	13.39	12.14	0.861373
C2CD2	1064	6199	587	1.955	8.021	10.19	0.685855
LAMA2	1456	5941	459	16.44	15.72	19.095	0.137536
ATP10D	988	6468	410	14.16	13.65	9.761	0.955176
IFT140	691	6119	1052	12.635	9.602	1.256	0.860151
WWC2	1492	6028	272	21	17.04	2.287	0.844526
MYOF	1529	6018	302	18.59	17.78	23.5	0.224504
HERC4	1214	6232	417	22.275	18.23	27.35	0.557111
COL15A1	1200	6102	549	14.94	11.65	10.335	0.91334
ACADVL	2253	5286	308	16.73	13.78	0	0.916388
NUP188	1158	6097	608	16.81	15.19	16.21	0.660266
ACACB	553	6543	769	19.14	15.535	14.985	0.568046
GPSM1	1153	6058	652	16.47	15.34	40	0.329742
LIMD1	1734	5770	349	7.463	10.705	1.717	0.87536
SETBP1	1735	5684	435	13.47	13.8	13.735	0.772429
ROBO4	1391	5958	483	13.535	11.76	12.66	0.752889
CDH3	1482	5719	638	14.51	8.6475	0	0.844214
VPS13C	1055	6442	368	18.98	17.95	9.735	0.982802
VIM	1007	6016	841	16.66	20.095	25.6	0.242644
BRD3	1162	6079	621	15.47	13.2	0	0.904752
ANKFY1	2127	5388	340	19.74	14.415	11.71	0.443057
FAM53C	1115	6018	731	20.145	17.03	27.64	0.5
RNF213	538	6025	1304	8.9325	7.876	7.57	0.715072
COL5A2	415	6762	689	20.55	19.45	18.105	0.833471
STC2	1041	5969	847	14.48	12.955	6.613	0.880217
RALGAPA1	1071	6104	689	22.3	20.5	28.9	0.0659629
NRP1	943	6117	807	18.705	14.66	24	0.0928281
CBFB	1477	5736	640	18.87	17.59	18.39	0.598896
TGFBR3	1219	6214	431	13.76	13.04	14.945	0.741882
LONRF1	2223	4814	698	16.48	15.775	9.3605	0.84067
ANKRD17	968	6437	462	18.89	16.17	10.5145	0.941865
NISCH	1814	5690	337	16.91	11.68	15.665	0.338873
AIM1	1529	5816	469	16.54	13.9	9.818	0.904328
UBAP2	1387	5817	661	19.775	13.22	14.935	0.61644
PER1	2248	5306	297	15.19	13.61	0	0.992738
SEC24B	1273	6339	257	16.25	16.69	0.8325	0.933792
MAST3	569	6544	755	16.24	13.1	13.91	0.810939
LCMT2	1300	6251	285	14.36	10.92	6.76	0.866055
MAPKBP1	1336	6217	273	16.59	14.86	17.045	0.658885
ZNF395	2213	4832	694	23	10.32	19.6	0.508566
APP	1040	6244	563	15.1	17.545	21.85	0.391513
FGD5	1495	5839	527	14.54	10.77	11.015	0.718291
DAPK1	1200	6150	513	16.005	15.96	20.5	0.64647
FBXO31	1654	5573	598	18.71	13.62	13.17	0.693551
MBD1	1852	5626	362	19.94	17.395	21.88	0.406497
DCLK1	1584	5515	730	19.275	17.215	11.21	0.753825
HIPK1	1157	6205	474	17.31	15.905	17.92	0.479451
SYNPO2	1281	6311	266	12.68	11.77	6.231	0.964569
KBTBD6	1677	5408	715	16.59	13.795	13.33	0.43702
MAST4	1423	5915	494	19.165	14.19	17.34	0.621375
SYNPO	1077	6012	776	14.225	12.875	4.652	0.941843
RNF214	1423	5944	467	16.76	17.4	11.4235	0.926127
KANK2	740	6421	703	12.52	10.15	2.5325	0.889485
MOXD1	1448	5946	464	14.17	13.16	13.27	0.697493
PHACTR2	1481	5932	441	20.99	15.56	34.5	0.0654302
TOPORS	1517	5731	608	13.715	11.98	3.746	0.704198
ZEB2	480	6822	547	17.265	15.47	16.24	0.596719
XPO4	1477	5638	730	19.15	19.05	18.385	0.823544
JMJD1C	1214	6203	441	18.145	18.1	10.52	0.959273
KDM3B	1111	6021	732	19.48	17.915	26.05	0.207457
HYDIN	1511	5714	621	11.63	8.407	25.9	0.0605707
ARID1A	1472	6073	301	40	40	31.35	0.902153
RPTOR	539	6021	1304	19.85	15.09	21.6	0.301828
CCAR1	1216	6229	420	19.27	17.285	18.76	0.657963
ZNF202	1382	5971	482	15.535	9.341	17.53	0.306053
NT5DC2	1813	5694	335	15.335	11.575	14.48	0.607907
SNX9	1581	5859	398	18.8	15.69	0	0.954519
LZTS1	2302	4784	658	16.805	13.34	1.6275	0.960189
TRPM2	1061	6183	616	13.56	9.8015	0.2655	0.885727
SIK1	1058	6192	609	11.74	7.5435	0.219	0.861396
MPDZ	1843	5364	610	17.575	16.62	19.975	0.355086
ADAMTS9	1643	5829	379	19.68	16.46	3.538	0.974777
DENND1A	1124	6119	621	17.705	13.94	16.46	0.706488
ANKHD1	1101	6030	733	18.145	17	14.75	0.918773
DPP9	1178	6190	487	15.49	11.72	9.005	0.792249
PFKL	1060	6178	619	14.415	12.21	20	0.427246
ARID2	452	6548	854	31.35	19.7	19.69	0.723163
TBC1D5	1519	5855	484	18.465	14.95	12.785	0.766216
SLCO2B1	739	6282	846	13.28	11.94	4.136	0.943809
SVIL	993	6090	782	17.565	14.4	13.595	0.842959
XPNPEP1	1479	6034	341	19.17	16.935	23.1	0.401935
KIAA0586	1253	6095	518	15.72	14.225	7.791	0.91928
TRIOBP	1489	5834	541	13.35	12.23	10.42	0.955783
IQGAP1	836	6374	657	23.125	17.53	15.21	0.75394
MUC6	1274	6196	367	26.765	12.24	9.786	0.805569
DYNC1H1	1268	6009	572	20.5	17.23	16.05	0.658831
IRS2	1154	5676	1032	14.695	10.84	0	0.990324
JAK2	1803	5352	662	21.55	21.8	18.91	0.696338
TOP3A	2028	5447	377	14.71	12.92	9.8905	0.954473
LARP1	1086	6017	759	22.15	18.33	29.4	0.111871
SPG11	1265	6271	296	15.66	13.28	15.76	0.690923
UNC5B	1224	6195	444	13.92	12.095	18.85	0.613629
ITPR1	1504	5805	529	18.23	18.43	17.51	0.850293
MCPH1	2194	4848	686	14.685	11.97	10.685	0.566683
MCC	1310	5878	650	19.495	17.94	18.02	0.618165
TTC7B	1287	6017	547	18.16	16.43	14.3	0.951937
COL16A1	1179	6244	442	15.075	12.05	14.64	0.487598
CASZ1	1400	6007	436	19.64	14.87	14.721	0.689247
TNFRSF10B	2327	4755	639	13.63	12.035	0.028	0.969721
KDM4B	1132	6218	509	11.44	9.122	18.9	0.5
ATP8B1	1880	5582	362	23.4	19.235	23.4	0.618178
ITGA4	416	6752	693	18.355	14.09	10.91	0.892345
POSTN	1607	5482	729	19.005	16.035	17.2	0.86388
PLCG2	1636	5594	605	17.115	14.985	11.143	0.736088
NLN	1405	5924	508	17.17	14.405	0	0.924073
RIPK4	1060	6192	595	19.085	14.685	16.595	0.94132
LRRC16A	581	6203	1079	20.615	17.86	13.58	0.974502
ZBED4	1664	5683	459	13.63	11.04	5.736	0.901875
FGFR2	1400	6033	422	20.75	18.66	25.2	0.130724
ALDH1B1	1374	5886	579	15.99	13.265	12.755	0.830606
ZBTB4	2261	5283	303	14.065	11.55	15.42	0.341408
PIK3C2A	1039	6399	428	18.21	15.83	0	0.99132
ZC3H12C	1400	5958	466	16.08	14.61	21.4	0.377292
PRDM15	1059	6201	588	14.215	12.65	10.835	0.564712
VCAN	1415	5924	516	11.55	10.51	12.44	0.504604
TRIM2	1344	6224	279	19.51	15.635	17.22	0.768568
HERC6	1237	6359	268	12.65	10.4	13.6	0.538895
ATHL1	1291	6174	370	10.94	9.21	8.33	0.71263
RIOK1	660	6103	1091	24.4	15.075	4.611	0.954519
OBSL1	725	6618	505	14.345	11.31	12.585	0.769686
HINFP	1389	5956	495	20.9	17.85	15.63	0.722167
SLC7A2	2258	4810	681	17.64	10.9	11.58	0.434978
PTPRS	1133	6214	514	17.235	15.27	0	0.995076
ELF1	1667	5421	712	15.63	14.47	19.185	0.192042
NLRC5	1427	5804	623	11.515	9.271	6.748	0.884401
POLI	1859	5601	368	15.54	10.91		0.884401
PRDM10	1362	5966	503	19.23	19.56	20.3	0.408701
ECE1	1430	6084	341	18.015	15.62	17.39	0.537099
UBXN11	1443	6097	316	10.17	10.0365	13.095	0.40876
WDR6	1793	5723	326	12.87	11.32	10.23	0.672788
HPS4	1411	5929	520	15.71	8.091	11.27	0.352935
LAMA3	1214	6001	650	15.93	12.885	13.32	0.726397
SCAF1	882	6165	813	13.765	11.21	14.47	0.704177
LZTR1	1300	5968	597	24.8	22.1	15.865	0.989473
SLC4A7	1544	5863	449	25	19.605	16.885	0.924664
KIAA1211	864	6517	484	12.865	10.084	12.01	0.524524
STK11	1317	6064	463	28.1	27.7	20	0.692002
BRCA1	913	6148	794	13.06	10.62	14.385	0.736822
P4HA2	1208	5938	708	21.6	19.045	21.8	0.416413
EDC4	1482	5728	642	14.69	14.77	14.525	0.516242
LOXL2	2321	4760	643	18.62	16.075	16.605	0.772017
MYLK	492	6093	1279	16.6	13	10.895	0.884842
INPP5B	975	6342	551	20.045	17.54	0	0.912992
GPATCH8	908	6128	811	16.565	13.59	10.995	0.929378
ITGA2	1112	6092	630	18.32	14.495	15.635	0.874309
PLD2	2138	5384	337	14.94	10.99	17.47	0.469053
LRRC8A	1154	6097	612	13.81	5.7085	3.9	0.867456
PHLPP1	1869	5568	385	19.79	18.44	28.4	0.479115
MLLT4	1586	5819	414	21.5	19.78	17.99	0.92386
SAFB	1122	6216	522	17.405	16.02	14.63	0.952557
DEAF1	1276	6177	380	14.25	11.48	15.445	0.473859
FAT4	1279	6323	254	14.89	12.79	16.135	0.287699
SH3TC1	1197	6224	436	4.41	5.785	12.115	0.405823
FNDC1	1570	5871	398	13.74	12.3	10.49	0.907555
TLN1	1326	5838	703	19.53	18.16	18.365	0.794258
KIAA2026	1814	5354	647	13.1	10.68	14.6	0.34254
YTHDC2	1305	5881	652	17.66	17.425	19.35	0.669017
MEN1	618	6653	593	29.9	23.55	20.4	0.963597
OSBPL5	1273	6211	356	12.41	7.835	4.4295	0.877021
TCOF1	1075	6015	776	11.145	10.1	13.78	0.163443
CARS	1282	6200	359	17.3	10.91	7.996	0.760676
DDX60	1374	6177	279	12.95	11.08	11.85	0.746647
MALT1	1869	5586	368	22.55	17.2	19.255	0.485252
XPC	1501	5836	524	13.475	10.143	15.565	0.280196
FAT2	1092	6018	754	16.625	13.155	18.74	0.349761
PTPRG	1684	5802	357	20.13	17.36	17.275	0.620677
RGS3	1137	6124	604	19.14	15.35	10.337	0.958027
SFMBT1	1802	5713	328	24	18.985	8.96	0.906866
RXRA	1166	6080	617	19.14	13.02	22.65	0.381159
KANK1	1795	5348	653	19.03	11.66	11.84	0.787637
TRANK1	1605	5842	413	12.065	11.01	9.5925	0.90435
CES2	1474	5735	646	11.352	9.309	16.525	0.129911
HPS1	1534	6014	299	18.54	14.13	24.1	0.22713
CTBP2	1416	6017	419	11.43	10.87	6.87	0.86234
RREB1	659	6110	1085	13.03	10.08	13.04	0.714501
AGTPBP1	1197	6171	494	26.4	17.1	21.735	0.57165
DICER1	1301	5989	556	23.2	20.6	13.85	0.939529
APCDD1	1194	5920	751	15.22	12.19	12.835	0.728706
SFXN4	1444	6052	361	13.38	9.568	3.281	0.852081
NCOR2	603	6467	795	12.66	11.5	10.055	0.961958
ADAMTS2	1007	5967	879	13.755	11.9	10.59	0.705734
ZCCHC2	1870	5570	381	15.95	12.6	19.195	0.362223
RAP1GAP2	2122	5406	329	16.95	13.105		0.362223
QARS	1787	5727	328	19.83	14.74	18.81	0.735953
KIAA0922	1351	6223	274	12.175	9.589	11.7	0.714743
COL4A2	1162	5669	1030	14.09	11.85	9.2375	0.947948
CSPG4	970	6424	470	12.22	7.245	6.2335	0.84413
KLHL18	1769	5749	329	28.4	19.94	7.005	0.962869
TRIM16	2177	5351	320	11.325	9.712	14.52	0.25143
PDE4DIP	292	5938	1637	15.86	13.52	13.48	0.830199
EVPL	519	6010	1339	13.55	10.435	12.065	0.837198
GRK5	1445	6054	357	16.63	16.195	15.53	0.809688
UBE4B	1401	6015	426	28.3	18.705	11.05	0.968259
KLHL36	1648	5589	594	21.1	11.19	13.46	0.793706
EPS8L2	1272	6179	384	16.15	12.72	0	0.973129
F2R	1435	5907	500	15.8	10.23	15.67	0.642098
PTK2B	2241	4803	686	17.65	14.36	17.74	0.527559
DOCK5	2286	4782	654	18.94	17.53	15.57	0.81606
SPTAN1	1152	6089	621	21.5	19.695	18.3	0.923091
TNPO1	1435	5907	495	27.45	20.6	18.99	0.815456
PLEKHA5	506	6154	1200	22.3	17.96	17.785	0.887085
B2M	1257	6272	295	40	40	40	0.693155
IL6ST	1251	5995	580	17.09	13.92	11.33	0.77273
MLH1	1599	5843	413	29.1	24.6	9.216	0.947584
NDOR1	1120	6047	693	15.72	6.769	18.65	0.374304
DIP2C	1070	5875	899	18.75	18.03	8.64	0.985893
DOPEY2	998	6260	600	16.315	14.09	15.495	0.693514
KIF13B	2160	4862	725	19.83	16.82	21.5	0.593216
TJP1	1241	6267	319	21.05	18.265	17.325	0.82125
TNRC6B	1558	5820	483	20.5	14.98	14.35	0.832783
RHOBTB2	2324	4758	640	19.29	15.62	13.89	0.831384
FAM160B1	1448	6048	359	23.8	18.2		0.831384
DIS3	1432	5552	840	22.55	17.75	15.44	0.992123
MGA	1342	6208	275	17.805	15.93	14.42	0.930488
AMBRA1	808	6548	503	23.215	17.1	18.22	0.766373
CNDP2	1884	5532	384	14.97	11.775	26.145	0.323114
ACTN1	1381	5998	487	22.7	16.81	20.19	0.619461
SREBF1	2071	5412	364	14.73	13.6	23.9	0.219765
TRPV2	2158	5355	339	15.34	11.86	22.1985	0.414654
LAMA4	1543	5857	418	16.67	13.965	14.63	0.888095
AP1G1	1516	5703	622	21.6	15.88	13.67	0.8233
CYFIP1	1166	6291	376	18.31	9.9545	25.35	0.244891
SIK3	1423	5940	467	24.9	18.25	33	0.44183
IKBKB	998	5358	1472	16.45	15.92	15.795	0.914261
PIKFYVE	622	6671	558	21.1	16.98	21.05	0.562569
PARP4	1459	5646	746	10.5115	7.921	11.95	0.439749
SPRY1	1273	6325	259	16.46	14.425	28.28	0.174038
COL7A1	1787	5714	341	11.935	10.56	11.95	0.424924
PPRC1	1509	6019	322	15.1	13.14	15.28	0.506829
TRIM8	1504	6023	322	19.45	16.29	17.19	0.843914
PTPRJ	796	6598	469	16.33	11.82	15.94	0.749867
MAML2	1135	6121	596	14.21	6.985	13.775	0.43545
DMBT1	1415	6034	401	16.2	10.4	11.19	0.899268
ITGA1	1105	6090	640	18.425	14.94	18.195	0.685515
NBEA	1565	5528	738	22.4	17.93	25.2	0.850255
PCLO	288	5623	1951	14.81	10.16	8.45	0.98466
AP3D1	1307	6079	462	16.675	10.595	0	0.95376
CSDE1	1137	6208	492	24.7	19.67	17.225	0.928215
TECPR2	1265	5996	585	18.34	12.745	22.05	0.13996
HIVEP1	618	6131	1107	17.14	12.06	14.115	0.837502
WHSC1	1184	6149	516	23	15.12	9.9545	0.941713
IPO11	1362	5946	524	22.55	17.82	15.86	0.918006
MAP2K4	2240	5295	290	24.6	23.35	0	0.997908
MTMR3	1420	5878	565	21.85	12.98	3.273	0.950785
ARID1B	1586	5855	387	17.78	15.985	19.89	0.399358
MLLT10	1017	6036	806	24.8	18.035	17.67	0.966662
SEMA3F	1796	5710	337	22.8	16.24	0	0.924902
FAT1	1482	6010	276	17.995	14.7	11.49	0.816537
CREBBP	677	6144	1030	17.54	15.585	15.745	0.933749
ATP11A	1173	5665	1023	18.31	12.205	15.405	0.539913
CENPE	1278	6348	240	12.24	10.07	11.823	0.845469
SORBS2	1484	6026	278	18.99	14.9	21.95	0.290334
PLCB1	488	5625	1753	18.675	17.13	18.045	0.879585
MYO5B	1840	5642	365	19.27	14.12	19.95	0.38454
FANCD2	1497	5807	548	24.2	15.03	9.473	0.973326
C3	1050	6289	524	16.69	12.37	12.09	0.869109
MKI67	1414	6026	407	10.89	10.17	10.44	0.795027
SEMA6A	1299	5888	656	17.79	15.015	0	0.970524
DDX41	998	5966	892	26.5	16.595	13.71	0.938094
ZBTB7A	1245	6143	462	16.725	11.505	0	0.930307
PVRL1	1400	5955	483	17.75	12.76	6.21	0.925515
GSR	2093	4926	746	21.29	14.13	20.5	0.831887
GPS2	2263	5274	310	40	22.9	7.425	0.984636
LAMB2	1787	5724	331	16.18	14.21	15.8	0.554269
CUBN	1010	6016	838	16.87	9.6675	0.006	0.952079
ENC1	1441	5892	506	18.83	15.6	24.3	0.137332
MTOR	1388	6042	418	21.6	18.85	15.88	0.975618
VCAM1	1216	6225	416	14.695	11.28	16.47	0.456499
PASK	903	6437	465	11.675	7.618	11.89	0.819284
RBM47	1149	6334	377	21.8	15.28	17.445	0.813187
OTUD4	1250	6311	300	18.48	15.19	40	0.118133
FLI1	1370	5960	500	20.17	15.285	0	0.996708
PPP6C	1132	6103	628	27.5	18.4	14.552	0.94239
DOT1L	1308	6077	463	16.57	12.765	2.855	0.992157
LATS2	1482	5637	725	23.1	13.19	16.01	0.838796
TSC2	670	6129	1065	16.8	12.81	13.19	0.949252
FBXO30	1493	5920	437	17.47	11.62	18.125	0.454545
ZFP36L1	1388	5984	491	40	18.455	19.25	0.954383
VCL	1211	6164	484	27.7	20.95	16.505	0.948621
FAM65A	1479	5737	637	20.4	15.2	15.13	0.873377
EDIL3	1429	5910	515	22	14.925	20.29	0.711359
NCOR1	2169	5340	329	17.67	15.985	14.64	0.961591
JAK1	1068	6316	474	30.85	20.4	5.935	0.99342
SUPT6H	804	6156	909	28.3	17.29	17.93	0.933951
PALLD	1375	6167	287	17.705	12.49	22.3	0.180031
MYO19	949	6103	807	21	12.13	4.263	0.969526
MYH9	1514	5835	511	23.2	20.4	10.43	0.997484
MED23	1442	5948	466	28.7	21	15.6	0.919283
SLCO3A1	842	6369	655	24.6	13.63	11.564	0.910064
STK10	1048	5973	838	19.1	13.46	20.9	0.579105
KIAA1217	1021	6048	795	17.365	12.945	13.545	0.881225
APC	1319	5875	643	40	22.8	40	0.0704678
ITGB2	1070	6164	620	13.39	5.5405	7.63	0.893967
CABIN1	1342	5956	569	22.35	15.74	6.201	0.99885
SFI1	1452	5869	543	15.75	9.5765	12.46	0.802076
SETD2	1764	5746	334	28.9	22.9	18.45	0.994524
C10orf76	1516	6020	315	24.2	15.635	10.85	0.867338
AXIN1	697	6099	1061	17.55	14.73	13.555	0.985262
COL6A2	1053	6168	632	13.86	8.0725	14.83	0.507796
EVC	1203	6212	436	13.375	4.0825	5.38	0.853111
NLGN2	2265	5277	305	19.745	15.26	13.25	0.689259
JAG2	1252	5973	624	15.805	8.9125	14.73	0.746015
VHL	1490	5818	546	32	23	0	0.984223
RASA1	1440	5889	511	40	25.15	17.39	0.999232
TRAK1	1668	5816	372	27.2	14.455	25.25	0.812209
SLC26A6	1788	5714	339	19.35	10.52	15.995	0.775065
DEPDC5	1457	5868	541	24.25	18.345	25.5	0.668523
IRF2	1482	6022	275	23.75	16.33	18.955	0.884929
CDH11	1471	5766	618	21.7	15.455	21.5	0.368825
PSIP1	1869	5359	607	40	20.8	14.35	0.983567
ATG7	1508	5818	520	28.7	14.57	16.54	0.951881
PLXNB2	1664	5683	459	18.73	12.005	0	0.979336
ANKRD11	1625	5591	605	15.17	7.7215	15.48	0.787094
SMAD4	1841	5599	354	31	26.6	27.1	0.765925
KEAP1	747	6398	720	22.9	19.505	12.29	0.994524
USP54	1218	6167	480	32	14.165	10.93	0.999618
CYLD	1318	5864	665	28.3	17.23	23.6	0.680826
SMARCA4	748	6403	712	26.3	18.83	18.53	0.991536
TGFBR2	1563	5841	441	33.5	20.8	19.68	0.947231
BRD7	1317	5871	660	40	16.875	21.6	0.998329
NSD1	987	5958	907	25.1	16.695	13.62	0.998322
RB1	1679	5386	676	40	24.2	28.3	0.88144
BAP1	1812	5692	334	33	21.3	31.15	0.507812
TSC1	1165	6090	603	40	14.76	19.685	0.901337
FUBP1	1154	6251	452	40	17.57	18.8	0.995175
PBRM1	1815	5693	332	40	22.7	21.2	0.999929
NF1	921	6108	803	40	24.55	22.55	0.999999
CDH1	1483	5718	638	40	15.09	13.87	0.999974
CIC	814	6195	840	40	14.46	11.18	1

## Sheet: 4) WGS analysis
	median_CADD_HeZD	median_CADD_CNN	p_CADD
INTS10	0	18.32	0.0901239
BRPF1	0	16.75	0.0754588
SMG1		17.705
KIF20B	4.141	16.44	0.0447211
RTTN	10.65	12.55	0.212463
UPF2	7.54	18.605	0.0518595
SORL1	14.6	16	0.148232
BRD1	5.89	16.025	0.0576042
ACACA	1.8865	18.44	0.071266
SNX25	15.88	16.58	0.297905
REV3L	12.87	17	0.0154514
MYO5A	0	20.4	0.017457
RSF1	10.1	18.765	0.287376
POLR2A	20.82	18.975	0.672332
PRICKLE2	0	18.6	0.0342834
PRPF8	0	19.13	0.00943591
STXBP5	6.995	19.09	0.0237501
ASCC3	0	21	0.00193901
MST1R	0	17.2	0.0129736
TLR4	0	9.477	0.0420677
BUD13	3.597	17.27	0.0443759
AP2A2	15.15	21.9	0.390684
NEURL4	13.48	15.37	0.418877
TTC3	12.63	14.11	0.336185
PPIP5K2	0.01	18.44	0.0812466
PPP1R13B		24.5
SREBF2	6.3	17.76	0.135284
PI4KA	18.69	19.715	0.451365
MINK1	0	17.725	0.0701713
MYH10	19.47	21.7	0.172977
MON1B	20.14	16.27	0.856127
SYNJ2	9.377	19.2	0.290265
EIF2AK4	9.355	20.525	0.122377
INTS9	0	24.64	0.0166873
CTCF	17.89	36	0.0864758
USP31	11.85	16.445	0.313997
RAPGEF6	16.13	26.85	0.132341
ST5	21.2	21.3	0.5
ARHGEF12	15.53	20.85	0.119957
LRP4	13.73	20.22	0.31902
DDX24	9.445	16.895	0.258145
YLPM1	9.535	15.38	0.0428155
ATP2C2		16.275
FIG4	9.486	15.17	0.0968413
AHI1	4.8035	15.57	0.0623784
FARP1	12.77	16.035	0.114168
CUL9	20.5	17.08	0.706599
AARS	12.99	19.2	0.16956
CHD4	19.36	17.635	0.609544
CHD1	15.735	19.91	0.0990717
TRIP12	9.005	22.1	0.120295
PCNX	0	16.19	0.0624601
GUCY1A3	8.815	16.27	0.248991
HSPA4	0	28.9	0.220465
UPF1	0	14.7	0.0986852
LLGL1	6.239	21.9	0.119761
CSGALNACT1		14.06
PNPLA6	13.17	9.7105	0.422516
MDN1	13.465	14.365	0.29829
GEMIN5	16.44	10.968	0.710329
DHX34	8.527	17.61	0.231744
ALS2	2.339	15.785	0.294021
RBM25	21.1	16.16	0.817797
NUP98	25.8	16.86	0.838248
DDX17		20.61
ENPP1	3.342	21.7	0.165096
EXPH5	6.48	13.425	0.127914
RAP1GDS1	10.95	16.975	0.261142
ZNF292	11.9665	15.285	0.487361
WDR7	11.104	23.9	0.0348835
SNW1		28.95
LARS	15.04	18.125	0.307753
ABLIM1	25.045	29.5	0.735521
DYM	0	12.955	0.131998
TNRC6A	0	16.05	0.0726537
SEC31A	9.295	15.66	0.264156
SETD1A	17.93	9.706	0.961283
MACF1	9.2505	17.05	0.29777
TTLL5	22.5	20.27	0.600468
PCDH1	4.086	14.64	0.0377939
NUP214	5.715	15.975	0.159253
SPG7		9.771
USP8	15.75	18.86	0.147893
ARID5B	7.6415	14.7	0.144551
BRD4	7.075	12.5	0.369423
OSBPL1A	15.1	15.91	0.469853
SENP6	0	17.225	0.0240785
PDE4D	11.35	22.9	0.125141
LRP5	0	13.91	0.0254695
NOC3L	20.9	16.64	0.71926
ZC3H13	6.0825	15.69	0.0475068
VPS53	27.3	20.1	0.743185
CHD9	15.13	18.18	0.218557
ING1	9.58	19.75	0.179061
MAP3K1	14.5	22.55	0.172374
FAM178A	20.9	13.97	0.849591
TRRAP	8.185	20.13	0.135057
INVS	0	20.84	0.0925723
BTBD7	32	20.8	0.621365
FBN1	15.1	17.13	0.362634
CDC27	21.41	25.2	0.322667
HTT	0	17.14	0.0117991
USP6NL	9.441	14.32	0.188401
FN1	9.7875	19.09	0.313158
ESCO1	0	17.04	0.076017
CXXC1	13.59	17.57	0.144457
DIAPH1	7.43	19.03	0.0173638
CNOT1	18.33	23.5	0.322865
RPAP1	18.31	14.595	0.740074
PLEKHG1	2.511	17.73	0.016534
ATG2A	11.2295	5.612	0.607707
NID2	0	14.39	0.140656
ZC3H18	22.2265	18.33	0.568501
IKBKAP	5.135	13.975	0.141409
LAMA1	0	11.81	0.0481798
ACOX3	6.8695	12.38	0.330949
TCERG1	12.737	23.3	0.0656162
RRP12	13.26	17.92	0.113634
FXR2	20	18.935	0.525305
VPS13D	12.02	17.305	0.0672466
NEDD4	15.365	14.005	0.692303
VPRBP	22.3	14.115	0.651359
TBC1D4	0	13.17	0.0852688
SLIT3	18.96	12.11	0.80918
MYCBP2	16.35	18.55	0.368376
ACIN1	11.685	15.675	0.342097
MAN1B1	0	11.505	0.167969
KIAA0100		18.53
IARS	18.005	27.05	0.117782
MYO1C	10.42	14.395	0.137233
RNF123	8	16.62	0.162335
ELAC2	13.52	6.952	0.871241
PITRM1		14.1
EPB41L2	13.63	15.02	0.264858
PTPRK	24.5	20.3	0.657602
SH3BP4	0	10.665	0.115598
RNF145	14.42	19.98	0.178126
UHRF1BP1L		16.01
PDCD11	6.385	13.29	0.173564
CPE	17.53	17.3	0.556297
N4BP2L2	15.84	9.805	0.774209
FRAS1	15.05	15.09	0.538426
ATP13A2		9.57
NUP205	0	22.5	0.0415951
ZFYVE26	17.95	14.765	0.551739
LARP1B		16.76
C15orf39	16.89	13.2	0.700561
KDM4C	0.03	9.488	0.196539
TNS1	6.3	12.54	0.192226
PXDN	0.497	14.95	0.0810945
PAPD4	7.805	27.1	0.1722
KIAA0753	5.79	11.915	0.135397
SAFB2	5.38	12.78	0.215566
CAMTA1	21.7	14.105	0.915263
DDX60L	0.007	9.686	0.0576234
AKAP11	7.493	12.57	0.596326
BRD8	0	13.16	0.0781492
EHMT1	0	11.53	0.177629
MAP3K5	23.8	17.3	0.803731
FAM179B	17.25	16.88	0.74666
MPHOSPH8	17.78	19.59	0.321825
ANKRD12	4.976	12.5	0.102435
MICAL3	3.5245	13.19	0.0627732
NOP14	0	16.25	0.0749813
NFKB2	0	17.6	0.0953836
LCP2	17.53	11.61	0.725997
PAM	13.6	24.3	0.0280734
TM9SF3	35.5	17.775	0.945684
MANBA	9.905	8.756	0.542309
POLG	12.81	0	0.678409
WDFY3	14.525	18.46	0.0290994
ABCC1	0	12.67	0.0975111
NUP88	17.73	16.11	0.436686
GAS7	12.04	16.755	0.459213
CDK5RAP2	11.26	13.32	0.510548
CLMN		12.545
MBTPS1	18.13	22.45	0.363451
SACS	9.3845	16.445	0.0359525
PKD2	0	17.27	0.0863003
WDR59	14.485	19.84	0.0951878
PRKCD		14.74
FBXO18	28.6	11.88	0.928204
LIG1	19.43	11.63	0.78606
AP3B1	27.05	15.55	0.798235
HSPG2	0	12.82	0.0637288
MAPK6		16.46
MAML3	13.7	6.382	0.569633
BAZ1A	34.45	25.1	0.859883
CHD3	13.375	15.52	0.257528
ALS2CL	11.18	12.31	0.430615
PTPN23	0	15.42	0.080365
DSP	18.91	11.51	0.951264
RUNX1	22.6	26.4	0.5
FKBP15	6.062	8.094	0.584362
PLCB2	0	13.905	0.199515
SMTN	18.07	18.175	0.53023
NUP93	0	14.87	0.0511712
NBEAL2	6.271	15.19	0.337221
HSPH1	17.5	16.345	0.5
FAM193A	13.82	19.08	0.112547
CYFIP2	13.85	20.95	0.252766
CTNNA1	9.295	27.1	0.13252
SPIRE1		22.55
EIF4A1	8.18	14.63	0.32686
ERBB3	0	14.95	0.0258029
PHKB	0	8.087	0.160258
NDN		11.92
WDR11	8.165	17.3	0.143736
CCDC88B	9.512	10.35	0.479587
DENND5A	15.69	18.36	0.432519
PPP3CA	17.54	20.1	0.187251
PTPRF	0	14.56	0.0426167
TTC37	14.03	13.35	0.663692
DENND4C	12.04	15.68	0.140765
DHX30	0	15.53	0.277773
KIAA1598		13.02
PCM1	0	16.1	0.292658
INO80	12.37	21.2	0.030835
MYO5C		16.41
NPC1	20.3	9.491	0.920777
SERPINA3		5.98
ABCA2	7.695	6.522	0.445951
MAPK8IP3	0	12.165	0.208946
IQGAP2	12.48	17.81	0.540117
KIAA0368	29.1	22.5	0.772256
NEDD4L	16	25.85	0.416034
NFATC1	20.85	5.4155	0.987418
CHST15	0	18.46	0.118479
SPTBN2	9.0985	16.415	0.159139
DSC2		6.082
GEMIN4	4.125	11.589	0.223322
CIT	19.26	17.42	0.626834
RABEP1	0	24.6	0.0229463
PDS5B	24.2	23.8	0.475234
NFIB	32	19.55	0.935124
NEBL	0	13.19	0.11063
TBP	7.47	19.63	0.1
IKZF2	16.97	18.92	0.136115
RERE	0	21.9	0.0834643
IRS1	0	15.65	0.287814
PLK2	10.375	19.03	0.066758
TMEM175	0	8.478	0.115494
PKD1	0	3.947	0.201572
PDZD8	15.91	7.1035	0.753188
FUK	5.687	11.65	0.466151
EEF2	15.82	8.18	0.517679
MEF2C	18	17.7	0.626491
PELP1	5.56	8.897	0.435248
PTPRE	23.1	19.4	0.779707
TYRO3	0	16.76	0.15949
AQR	23.1	21.3	0.384346
TUBGCP2	3.3205	17.135	0.0768463
AKAP6	13.6	14.05	0.601181
BCL9L	13.67	16.45	0.126475
KARS		21.6
RANBP6	13.89	14.51	0.338897
CBL	12.29	12.9	0.401129
CROCC		11.4
MSR1	15.155	11.37	0.744096
KDM6B	6.025	11.15	0.283373
ABCA7	0	13.8	0.103761
ABCA1	13.93	17.875	0.242121
ULK2	13.005	20.025	0.0402037
CMYA5	0	12.03	0.23975
RBL2	16.98	20.9	0.441679
CNTROB	15.2	14.48	0.355612
SMC3	12.98	24.8	0.0733965
RUSC2	0.004	14.29	0.00646907
UNC13B	15.75	17.9	0.447434
LAMC3		8.414
WDR36	17.21	18.35	0.415555
CTDP1	27.9	9.2035	0.903175
DOCK1	0	15.74	0.224195
ELL2	20.2	25.8	0.202253
SMC2	16.09	24.8	0.103498
DOPEY1	4.8155	17.005	0.110712
TMEM2	19.29	13.64	0.579585
FYCO1		11.629
HR	0	15.54	0.103947
RANBP3	0.033	34	0.0321348
PTCH1	6.85	19.23	0.130096
ARAP1	0	18.13	0.0919616
ARHGAP5	13.98	13.82	0.548481
FBLN2	4.158	15.465	0.0566204
RAD50	19.87	23.3	0.103154
GOLGA4	13.1915	10.2145	0.72371
TCF4	0	22.5	0.021743
RHOT1	16.68	18.52	0.5
CD109	8.658	13.42	0.0253758
CUL5	12.39	23.3	0.0201836
SIDT2	0	17.17	0.0523707
NOTCH4	14.85	13.77	0.624574
NCOA7	8.5625	13.8	0.260788
FRMD4B	19.76	23.2	0.5
QSER1	14.53	15.15	0.600129
SYNE2	1.0365	11.15	0.0405645
DNAH1	13.444	13.89	0.417836
SMCHD1	14.91	16.28	0.456677
NKTR	8.64	14.73	0.29255
FNIP1	20.8	16.445	0.730092
MAN2A1	18.38	15.79	0.68666
COL12A1	14.325	18.595	0.147378
EPHA2	28.3	19.4	0.719925
RNF31	11.286	12.58	0.432988
EXOC6	8.905	17.84	0.208563
GBF1	14.66	17.68	0.167537
MYO18A		15.42
PPL	0	13.27	0.326438
FAM13A	8.835	9.422	0.402641
IFNAR1	0	18.035	0.0102465
ANK2	0.012	11.235	0.128032
LRP6	14.83	21.75	0.12592
C2CD3	22.4	15.35	0.831061
FRY	0	18.42	0.128761
ADAM19	14.915	13.53	0.418463
RALGDS	0	12.26	0.181651
MOV10	14.34	12.555	0.559766
DNMBP	22.8	19.415	0.64064
LMBRD1	6.51	17.405	0.0400539
DPYD	12.193	16.02	0.0986917
POLK	16.565	14.94	0.724785
ZNF646	0	12.44	0.26776
RYR1		13.79
CAMSAP1	12.309	12.9	0.541229
LARP4B		25.85
ERCC6	34	23.3	0.580067
ZNF469		13.35
ME2	20	16.22	0.617906
ILF3	15.93	17.7	0.386392
FLNB	0	17.38	0.124453
ALPK1	6.9645	14.15	0.108952
DLG4	20.35	17.37	0.822076
PIGO	5.289	16.76	0.33133
DNMT1	7.097	16.1	0.0964897
ZNF609	13.71	17.27	0.285379
RAB11FIP1	9.7685	11.82	0.313283
SNX19	2.83	17.67	0.0884546
ZDHHC8		16.61
LRP1	15.095	13.77	0.618506
RABGAP1	0	21.4	0.0897097
ARSB		11.315
RAI1	3.565	13.69	0.0699639
PHF2	0	22.3	0.0212323
SETD5	10.081	15.91	0.21548
ARHGEF10	27.6	13.86	0.862638
TBC1D9	17.635	18.035	0.437482
ZBTB40		16.49
KIF11	11.37	15.32	0.17029
PDGFRA	22.8	17.25	0.756602
AFF4	18.83	16.31	0.646583
MTHFD1L	29.9	14.87	0.764361
TACC2	12.73	10.985	0.611856
FCGBP	6.86	5.771	0.473919
GJA1	16.3175	14.31	0.839016
C2CD2L	10.03	9.695	0.609431
ITGAE	12.3525	8.098	0.696627
WHSC1L1	13.9	22.8	0.260518
PLOD1	0	16.825	0.302207
AKNA	11.03	6.359	0.61668
KIF1B	22.2	18.24	0.634941
SLC12A6	17.17	18.03	0.419635
GTPBP1	37	18.63	0.9537
AHDC1	27.395	14.92	0.840505
HERC2	15.23	14.88	0.24828
PTPRM	19.03	16.495	0.773171
WTAP	14.55	14.715	0.431954
XYLT1	0	21.75	0.059856
AHNAK	0.568	9.9045	0.0519078
EP300	14.58	21.45	0.00746124
EFTUD2	12.76	15.18	0.656156
DMXL1	17.41	17.23	0.363486
MYO6	19.26	22.15	0.343981
SEC24D	18.61	16.95	0.573325
ABCC4	5.94	15.945	0.0794967
LIMCH1		17.825
RANBP2	0	14.755	0.0964512
PARD3	23.15	21.2	0.590799
MAP1A	5.53	8.821	0.11307
ZNF33A	15.31	7.3235	0.795504
PRR12	4.079	10.96	0.158951
SASH1	0	14.18	0.264368
GAPVD1	27.35	25.4	0.411773
NPR2	0	22.4	0.322231
PRDM2	8.3	14.97	0.288348
SKIV2L2	28	18.99	0.772901
SMG6	16.61	16.9	0.5
PIK3R1	40	33	0.71469
REXO1		0.0035
MGAT1	17.775	14.92	0.924193
CUL3	23.95	21.2	0.725622
IGSF3	0	0	0.222364
A2M	10.11	8.3235	0.785912
SORBS1	13.385	11.89	0.791884
CHD8	10.39	16.48	0.392177
SHROOM3		10.3115
ZNF91	9.599	7.3215	0.7717
TNKS	24.845	20.6	0.72589
TRIM5	5.423	14.875	0.203363
SLC12A2	10.8	19.07	0.257295
WDR47	19.64	22.6	0.29901
TPP2		11.49
BICD2	0	18.36	0.102539
PHLDB1	6.125	16.29	0.0781345
DMXL2	13.94	19.17	0.0628601
KIAA0556	0	11.03	0.043677
PSD3	12.02	19.27	0.0395627
ANKS6	0	9.271	0.357128
FUCA2	0	18.89	0.142857
ZMIZ1	5.445	22.95	0.0751831
FREM2	14.16	15.35	0.5
GLB1	3.658	10.39	0.158469
ENTPD1	3.201	14.99	0.332221
CHL1		17.18
CELSR1	9.964	12.895	0.303784
MICAL2	12.415	15.955	0.242125
IDE	9.29	15.28	0.427658
EXTL3	10.7	12.79	0.413498
PKN1		21.5
VPS13A	12.02	16.05	0.0987708
RNF219	11.405	13.42	0.407407
VWF	1.318	13.255	0.0845155
FHDC1	2.6685	14.36	0.0421308
EP400	9.3515	10.7	0.331376
NUP210	2.7795	7.419	0.221379
NCAPD3	4.8875	12.95	0.140453
IL10RA	13.68	13.86	0.324616
RCBTB2	7.174	17.075	0.214072
CDC42BPB	20	10.97	0.679543
BAHD1	19.24	5.8005	0.906034
SNAPC4	9.286	10.445	0.455524
MYBBP1A	13.03	10.47	0.673027
CYB5R4	9.173	25.53	0.33424
LRRK1	7.18	3.27	0.285756
ATP10A	22.135	0	0.974271
BDP1	9.846	11.88	0.0759631
COL6A1	10.95	0	0.57645
UBR1	32.75	16.135	0.942135
MAGI1		12.755
MFHAS1	0	5.608	0.313422
ZEB1	0.193	16.055	0.0246315
CRTAC1		22.285
CCDC80	0	16.69	0.0880877
MAP1B	9.398	11.355	0.326004
FRG1	11.97	18.27	0.431976
STARD13	0	11.972	0.162705
SLMAP	40	0.0335	0.944327
KDR	24.9	14.58	0.961604
TSR1		10.1
MLH3	5.077	13.605	0.143235
SBF1	0	13.205	0.120552
CLASP2	18.32	21.3	0.341362
WRAP53	17.35	2.368	0.84239
ARID4A	15.89	18.56	0.291346
FAM135A		17.095
ARAP3	11.2835	7.214	0.67447
TNC	21.3665	13.66	0.741267
SEC23IP	0.045	17.16	0.0698686
GPHN	29.6	23	0.6372
CEP164	12.09	11.335	0.353078
ERBB2	10.59	15.94	0.417076
TP53BP1	9.215	21.5	0.130658
DOCK6	17	13.875	0.541702
SLC12A4	10.43	15.69	0.5
GCN1L1		15.28
PLA2G4F	0	0	0.5
TLE1	23.665	19.385	0.679682
SATB1	22.8	16.96	0.920217
NOTCH1	19.775	20.5	0.419205
GTF3C1		13.37
PLEKHG3	0	9.317	0.0734048
TMF1	21.775	16.54	0.655746
CSF1R	6.935	10.023	0.228673
SRCAP	0	12.575	0.0163602
NOL8	13.52	15.52	0.444889
ANO10	32.9	20.285	0.798576
ERAP2	0.015	14.895	0.324471
DVL2	20.505	19.05	0.574484
UBE4A	7.55	24.3	0.345443
WDR81	0	14.52	0.0311759
FNDC3A	16	14.16	0.774257
GLG1	18.45	17.13	0.5
AKAP13	19.75	13.69	0.871051
USP48	30.6	20.25	0.877112
PIGG	20.4	12.63	0.911934
IPO7	7.96	15.495	0.227659
MYH14	10.7	17.18	0.372038
DAAM1	0	18.08	0.110336
MRVI1		20.4
TLR2	0	10.151	0.0738127
CAMTA2	15.58	17.29	0.414022
TP53	24	22.95	0.547724
COL5A3	26.235	11.735	0.886255
PDCD4	20.65	16.28	0.846154
PHF3	5.746	6.151	0.449509
TTC17	10.85	14.6	0.330162
CDCA2	11.5	10.02	0.705446
SMARCAL1	17.775	12.61	0.897286
ENTPD4	0	15.19	0.13618
DCHS1	15.155	13.92	0.538467
INTS6	6.709	25	0.0958736
TRERF1		14.77
INPP5F	13.37	20.95	0.259327
COL17A1	40	8.734	0.945516
TNKS1BP1	10.45	11.65	0.435445
PHRF1	7.38	13.48	0.253167
NYNRIN	13.28	14.24	0.213223
KIAA1109	13.89	19.57	0.0902901
DNM2	0	13.95	0.0639259
WWC1	8.89	20.65	0.147759
KIAA0232	27.07	13.905	0.85303
DLG5	8.085	16.89	0.396444
FRMD4A	23.1	14.975	0.664811
AASDH	20	17.38	0.5
PLEKHG4	6.045	17.76	0.0363019
DOCK8	12.94	18.87	0.206561
PABPC3	28.05	12.66	0.88435
ATM	13.79	19.085	0.19678
PTPN13	0	14.19	0.044533
DSE	18.79	11.72	0.808935
ARHGAP21	24.85	18.26	0.971347
RBMXL1		14.87
THBS2	0	13.36	0.152039
IL16		1.295
MAP2K3	28.3	13.21	0.961928
ATP9B	32	18.78	0.954867
KIAA0020	0	21	0.0133887
DALRD3	0	19.805	0.0459625
WRN	10.465	11.87	0.480523
ANKRD50	19.4	16.95	0.776256
KIF2A	23.795	21.7	0.636364
DYNC2H1	28.1	12.07	0.939178
ABL1	28.2	10.0185	0.875397
HIVEP2	1.068	14.69	0.0429737
ZFHX3	13.915	12.6	0.633221
LONP2	8.725	23	0.0837101
NOL6	0	12.8	0.0983528
PIK3AP1	2.171	8.864	0.302481
HJURP	10.44	12.55	0.664291
MDC1	13.24	10.31	0.838639
INF2	0	5.204	0.18838
KIFC3	6.66	10.88	0.302967
EPB41L4B	22.3	23.8	0.463552
HDLBP		15.93
CCNL2	40	15.245	0.932017
NNMT	12.62	3.209	0.827012
HIPK3	27.565	19.11	0.72065
GUF1	14.19	19.405	0.312387
BIRC6	23.6	21.35	0.808551
OXSR1	14.43	17.65	0.344508
SYNE1	11.74	13.9	0.299919
MYO1F	5.01	2.482	0.323786
UGGT2	0	17.03	0.0542002
RAPGEF2	29.3	24.8	0.416661
ZNF407	11.61	11.67	0.403144
XAF1	6.122	0.012	0.75
RC3H2	10.8	23.35	0.0809257
NFAT5	13.1875	14.3	0.388187
FANCI	13.46	10.44	0.766655
SKI	0	7.2565	0.209246
NEO1	0	19.18	0.0268139
RNF43	40	40	0.874269
TSHZ1	0	0.014	0.116566
BCLAF1	15.96	15.615	0.460362
COL11A1	17.42	16.645	0.341224
HSPA8	16.82	17.79	0.459254
STC1	22.01	14.37	0.960439
MAP2K7	23.4	22.3	0.532936
MATR3	13.55	14	0.388578
TEP1	15.13	11.85	0.590949
SH3RF1	16.5	19.305	0.483227
ELP2	10.17	13.15	0.457221
C10orf2	13.235	5.648	0.407493
TNK1		11.0555
PDE4A	18.79	9.2805	0.886094
SLFN11		10.57
HYOU1	0	20.3	0.127806
TCF12	28.05	25.5	0.589554
PDGFRB	16.32	11.9	0.582186
AKAP12	17.34	12.8	0.819372
COL5A1	16.215	15.11	0.488264
SMYD4	10.1315	8.5945	0.71018
LMO7	2.591	17.05	0.070704
ATG2B	21.5	18.14	0.585649
PER3	9.215	9.5875	0.430698
PDPR	24.525	17.09	0.835014
NFKB1	4.749	10.8615	0.274305
GOLGA3	4.635	15.56	0.407052
METTL3	24.1	18.485	0.723216
NCKAP1L	17.83	12.97	0.874122
IFNGR1		16.12
MEX3C	11.7	23.3	0.4
STK11IP	0	14.465	0.0936027
THBS1	17.02	19.39	0.467337
HECTD1	7.655	17.29	0.135245
SECISBP2	24.6	15.645	0.767382
PLAA	13.075	19.06	0.369574
HDAC4	15.85	15.815	0.51998
SPRED1	17.94	19.655	0.3033
ZNF462	11.89	15.71	0.100213
RAP1GAP	23.7	16.2	0.774667
CDKN2A	28.65	27.05	0.337258
FAM160A2	13.85	19.04	0.184683
DNAH2	19.885	24.6	0.34682
DDHD1		15.57
AHNAK2	0	9.019	0.0872103
SBF2	31	20.3	0.887179
EGR1	8.68	15.33	0.246116
DLC1	8.5805	10.6245	0.493553
LRCH1	20.1	15.11	0.722686
ITSN1	18.635	17.72	0.623881
PAPLN	0	13.96	0.0956681
MLPH	11.11	9.443	0.57807
JMY	29.6	14.16	0.810779
USP20	18.55	15.92	0.739141
ZNF532	0	12.68	0.236481
NLRP1	8.192	11.15	0.5
ADCY7	3.716	11.84	0.334617
GAK	15.235	17.55	0.325264
THOP1		13.12
NFATC3	25.6	12.08	0.96216
UBR4	4.885	18.51	0.0729055
FLT1	9.0915	12.83	0.347207
PTGFRN	15.71	18.355	0.463062
DIP2A	16.58	18.66	0.28875
UACA	15.96	13.765	0.758814
CELSR2	16	13.02	0.745205
DST	13.695	16.42	0.13792
MUC16	3.368	3.7555	0.218542
PCDH18	15.76	12.875	0.567419
SH3PXD2A	13.55	16.23	0.459502
BBS7	10.57	12.78	0.480454
MAP4	1.3685	13.99	0.0295151
ITPRIP	0	12.555	0.176955
DHX37	6.52	11.72	0.257848
BRWD1	21.61	17.59	0.746471
CUX1	21.7	19.075	0.590999
TGIF1		29.22
ZCCHC11	21.2	17.06	0.426159
TLE4	16.36	14.81	0.291125
ARHGEF17	8.09	14.515	0.288972
NPEPPS		17.19
ZNF644	7.29	12.13	0.285475
SPEN	5.62	12.825	0.109665
SMARCC2	18.18	15.63	0.803875
LIG3	0	21.5	0.0826819
TSC22D1	0	11.85	0.0711304
MCM3AP	0	10.619	0.0619914
PLXNB1	20	12.92	0.589246
TRPM7	11.25	16.77	0.29232
ZNF33B	7.57	12.945	0.170262
CCDC88C	0	9.8295	0.12088
RRP9		13.375
ZZEF1	14.915	18.02	0.244949
TMEM181	7.785	23.9	0.142212
ZNF445	7.715	5.466	0.683995
MAP3K4	25.9	18.7	0.941879
LPIN2	29.6	19.05	0.886554
PPIL4	23.1	12.3	0.852599
NFX1	0	11.99	0.0546928
COL3A1	14.97	16.805	0.469993
PCNT	2.249	6.6705	0.189082
MPRIP	18.66	23.25	0.362894
WAPAL	20.245	18.97	0.57977
TAF1C		11.865
PDIA3	7.505	22.5	0.225
SVEP1	22.37	14.725	0.872905
CDAN1	0	21.9	0.01358
TBC1D1	18.54	10.995	0.976436
KAT2B	17.56	20.6	0.413882
FAM160B2	16.34	6.454	0.93215
SH3PXD2B	8.3265	6.054	0.598764
ARHGAP32	12.81	18.58	0.10342
MAP2	0	10.59	0.110794
WDR19	14.345	14.14	0.554907
MMP2	8.12	13.2	0.269578
ZNF518B	11.7	9.427	0.482171
SYNJ1	14.16	14.095	0.463502
TBC1D2	12.06	12.225	0.525305
INSR	19.82	13.665	0.827462
KIF1C	14.9095	12.565	0.729134
SMAD2	20	26.9	0.43994
UTP20	9.032	16.555	0.0529853
DOCK2	3.835	18.075	0.267991
IGF2R	18.15	10.8	0.659524
GAS6	4.988	15.3	0.131055
SORBS3	23.1895	7.24	0.864518
TULP4	19.1	18.565	0.431499
TCF7L2	20	23.5	0.561158
CTNNB1	32	22.45	0.814661
BMP1	16.6	12.46	0.678611
MAML1	0	15.955	0.0453012
SON	14.765	13.49	0.653591
FANCA	6.153	11.34	0.289525
SGSM2		15.66
AMPD3	31	19.28	0.779762
EPB41L3	14.49	16.05	0.766929
FYN	27.15	21.1	0.782836
COL18A1	5.575	8.6955	0.300828
CHD6	7.06	20.35	0.210229
CDON	0	17.11	0.0371585
ZNF142	13.33	15.705	0.313938
AFAP1L2	26.8	11.65	0.758807
COL6A3	2.6215	9.9495	0.221527
MIIP		12.48
L3MBTL2	0	17.16	0.154814
SETX	14.7	12.23	0.329176
AGRN	11.455	12.95	0.690535
NIN	4.2005	12.75	0.202476
FCHSD1	14.62	17.64	0.191667
UBA6	15.015	14.06	0.380237
ZNF721		5.8285
HDAC10	3.972	10.31	0.42193
KIAA1462	7.187	12.14	0.525906
ODF2	27.3	17.26	0.978582
PHF10		22.1
TBCK	13.4	21.3	0.110145
USP10	0	4.972	0.178074
BTRC	0	24	0.0950039
USP24	32	24.6	0.777665
KIF15	21.05	17.83	0.736905
RIN3	5.915	9.5665	0.333744
RPS6KA2	12.44	10.206	0.5
DHX29	34.5	20.65	0.763391
TMX3	13.64	11.7105	0.563102
LONP1	17.93	0	0.881088
ABR	0	15.98	0.0266487
ADAM12	0	9.729	0.0423836
WNK1	23.8	15.175	0.904531
MED16	10.24	16.98	0.231874
PRKCH	20	18.74	0.589776
SIPA1L1	6.051	15.84	0.198083
ACO1	9.745	19.575	0.107107
SLK	20	21	0.51725
MAGI3	15.5	24.15	0.408668
MUC5B	3.379	3.254	0.530567
RFX7	10	12.25	0.639725
TET2	15.3	12.94	0.399309
ARHGEF10L		14.37
RGS12	10.22	17.33	0.0830171
COL4A1	6.6385	13.52	0.152092
PIBF1	15.6	19.05	0.376808
CDH5	15.12	12.06	0.555418
PITPNM2	0	3.7125	0.205357
SH2D3C	15.26	12.16	0.622775
VAV2	19.87	15.885	0.775739
ATP2A3	10.5	12.6	0.521738
SP100	11.71	12.63	0.191778
HEATR5A	22.1	20.2	0.595326
RNF111	17.29	20.65	0.579799
RBM26	21.375	22.3	0.548598
ANK3	18.63	14.96	0.80415
TCF20	17.18	14.14	0.907131
NPHP4	1.105	8.886	0.51928
FBLN1	15	15.19	0.679039
BPTF	12.4145	13.365	0.44059
FNBP4	0	15.1	0.104279
FOXRED2	1.864	13.675	0.271407
ITGAX	13.02	2.542	0.807835
SEC16A	18.75	14.7	0.73526
CELSR3	4.37	14.84	0.315262
ITPR2	19.435	17.57	0.623625
ARAP2	15.72	14.385	0.611043
USP19	17.53	3.932	0.847329
ERBB2IP	9.829	18.4	0.15726
VLDLR		12.535
TYK2	0	10.36	0.153483
PLEKHA7	3.933	13.17	0.307747
EIF3A	15.79	16.27	0.251801
DSEL		13.73
BTAF1	19.175	15.26	0.739733
MYO9B	11.09	15.23	0.326702
ZC3H7B		12.26
PCDH7	10.45	17.575	0.159111
ATXN7	28.3	10.02	0.849258
TOP2B	0	20.4	0.0805742
PLCE1	8.34	15.985	0.300655
ATF7IP	7.925	21.2	0.0674226
OBSCN	11.22	11.87	0.395498
SGK223	14.75	10.52	0.564573
MICAL1	11.32	14.225	0.185735
PCSK7	13.2	17.28	0.5
HERC1	27	20.4	0.806221
IMPDH2	0	9.33	0.262259
FLCN	16.11	18.835	0.449406
HSP90AA1	19.34	17.54	0.710515
DAB2IP	14.75	0	0.710546
DYRK1A	31.8	24.5	0.788413
TRAPPC10	8.234	11.36	0.389887
FOXP1	28.8	23.3	0.86594
PFAS	12.86	14.675	0.441719
NT5E	8.943	19.14	0.117716
SCAP	11.9165	11.77	0.378591
FAM120B	28.275	13.135	0.934839
RAPGEF1	13.975	13.23	0.59604
MANEA		16.32
AP4E1	3.547	11.515	0.311035
NFRKB	18.45	12.795	0.884402
WFS1	17.57	0	0.991897
ADD1	18.85	0	0.942885
COG4	23.28	15.25	0.818939
CLU	11.635	12.225	0.595512
ACTA2	21.4	17.625	0.883656
ARIH2		9.732
USP4	0	14.33	0.121156
CEP192	14.23	13.36	0.442683
NLRX1	12.93	13.82	0.516231
RBM5	28.7	17.82	0.917611
NUP160	29.6	0	0.932788
USP28	24.4	20.75	0.827705
UTRN	0	14.555	0.0893104
DSG2	12.96	10.92	0.804607
SRRM2	11.135	9.008	0.695747
XPO7	14.5755	15.72	0.619087
BMS1	19.19	14.275	0.96606
NOTCH3	22.6	14.74	0.741812
MYO9A	18.16	17.54	0.377591
FBXW7	24.7	28.9	0.357154
FRYL	16.3	17.69	0.372532
SMCR8		16.61
NOTCH2	40	22.6	0.959864
TIAM1	0	18.35	0.0481131
MTUS1	17.63	13.355	0.650359
CD248	11.47	9.296	0.612004
THRAP3	19.51	18.13	0.383421
ARHGAP29	1.837	16.5	0.0699519
LCP1	23.7	17.84	0.759097
STAB1	14.74	14.19	0.766562
ZNF236	12.76	19.33	0.172543
PDGFC	0	13.2995	0.209246
FRMD6	33.1	16.63	0.893896
SMARCA2	23.7	17.475	0.870052
TBC1D9B	0	1.034	0.056925
ZCCHC6	28.5	17.515	0.857256
MAN2B2	0	5.713	0.168133
FLII	21.2	5.695	0.842474
MADD	17.91	21.3	0.191679
SEC24C	14.59	16.96	0.344452
DPYSL2	21.82	24.8	0.398758
COL27A1	16.1	13.95	0.678452
LRIG1	40	10.59	0.886185
SLC39A6		11.81
TLN2	33	20.4	0.982973
SYK	12.845	11.96	0.573858
SEL1L3	11.5	14.02	0.422421
LRBA	16.91	17.07	0.549751
NOLC1	26.7	12.68	0.631888
LTBP2	13.7445	16.61	0.449966
CDKN1A	40	40	0.776325
TUBGCP6	0	12.8	0.0589233
VPS39	21.2	14.075	0.806528
AGGF1	22.45	14.69	0.878388
UBA7	0	5.175	0.233809
PTPN21	20.445	20.78	0.565543
SMC5	40	16.325	0.992073
EIF4G3	0	20.45	0.0808661
INADL		13.755
ADAMTS1	28	14.08	0.858825
CD163	15.61	10.9	0.560131
ASPM	25.9	15.27	0.676797
C2CD2	9.804	3.5965	0.753219
LAMA2	16.8	14.77	0.80019
ATP10D	16.92	13.055	0.613934
IFT140	11.07	9.169	0.68652
WWC2	13.09	17.05	0.256187
MYOF	24.2	17.02	0.943069
HERC4	21.642	20.7	0.455529
COL15A1	15.82	11.135	0.57261
ACADVL	40	14.965	0.961288
NUP188	17.61	16.665	0.606695
ACACB	27.4	17.34	0.885121
GPSM1	20.775	9.07	0.803423
LIMD1	0	11.67	0.184041
SETBP1	10.71	12.12	0.65759
ROBO4	11.69	8.873	0.370066
CDH3	25.6	8.393	0.967013
VPS13C	18.39	17.19	0.543417
VIM	26.31	14.66	0.903686
BRD3	0	12.06	0.173013
ANKFY1	11.5	17.91	0.55746
FAM53C	16.361	15.5	0.452879
RNF213	3.778	7.8925	0.23219
COL5A2	25.7	17.84	0.930146
STC2	11.38	12.93	0.5
RALGAPA1	11.15	20.5	0.215217
NRP1	21.435	15.52	0.797869
CBFB	17.89	16.61	0.666667
TGFBR3	7.22	4.933	0.414176
LONRF1	11.18	11.35	0.577093
ANKRD17	28.65	15.83	0.981676
NISCH	11.65	5.4065	0.740189
AIM1	23.71	13.01	0.885851
UBAP2	20.3	13.22	0.736893
PER1	18.94	15.85	0.676401
SEC24B	35	19.51	0.914836
MAST3	6.755	17.16	0.137613
LCMT2	6.745	5.948	0.5
MAPKBP1	19.1	15.995	0.510634
ZNF395	15.72	20.7	0.383216
APP	35	18.43	0.966802
FGD5	16.04	12.25	0.767736
DAPK1	14.735	12.445	0.664517
FBXO31	13.72	12.48	0.576854
MBD1		20.6
DCLK1	27.9	18.56	0.782876
HIPK1		15.79
SYNPO2	16.79	11.08	0.896334
KBTBD6	15.415	12.365	0.794025
MAST4	5.619	15.09	0.241707
SYNPO	19.15	12.25	0.741639
RNF214	16.16	15.99	0.764172
KANK2	12.99	6.598	0.911512
MOXD1	0	13.16	0.455818
PHACTR2	12.37	22.2	0.190299
TOPORS		10.92
ZEB2	15.02	16.42	0.19991
XPO4	8.665	18.805	0.105795
JMJD1C	17.95	18.59	0.510906
KDM3B	20.4	20.5	0.51176
HYDIN		4.2035
ARID1A	34.8	40	0.315798
RPTOR	0	15.56	0.0620055
CCAR1	17.895	19.65	0.355669
ZNF202	0	5.341	0.109466
NT5DC2	16.5	19.075	0.571429
SNX9		16.35
LZTS1	6.09	0	0.5
TRPM2	12.975	6.349	0.813168
SIK1	9.234	0	0.675622
MPDZ	24.43	19.675	0.688361
ADAMTS9	22.25	19.6	0.625378
DENND1A	40	10.433	0.947647
ANKHD1	17.01	18.68	0.192688
DPP9	14.28	14.55	0.418165
PFKL	11.695	13.41	0.264224
ARID2	40	21.4	0.696255
TBC1D5	24.1	15.195	0.775434
SLCO2B1	26.7	14.92	0.783512
SVIL	19.435	11.98	0.835989
XPNPEP1		20.8
KIAA0586	22.514	13.65	0.776094
TRIOBP	0	14.52	0.0827369
IQGAP1	2.646	18.745	0.0359117
MUC6	40	11.69	0.939709
DYNC1H1	23.9	17.4	0.686596
IRS2	7.488	27.3	0.0299045
JAK2	40	24.2	0.815756
TOP3A	7.845	9.76	0.55281
LARP1	20.485	21.1	0.51472
SPG11	11.56	9.813	0.656911
UNC5B	32	4.137	0.941545
ITPR1	21.505	18.68	0.73553
MCPH1	16.38	7.0955	0.852797
MCC	19.37	17.24	0.575399
TTC7B	22.45	14.65	0.961535
COL16A1		12.05
CASZ1		19.26
TNFRSF10B	12.735	9.304	0.856127
KDM4B	21.7	15.56	0.624418
ATP8B1	17.75	18.28	0.489801
ITGA4	18.355	18.07	0.72526
POSTN	5.065	15.635	0.145787
PLCG2	18.285	13.97	0.545327
NLN	21.52	13.34	0.853473
RIPK4	22.4	13.19	0.792946
LRRC16A	11.45	17.83	0.252414
ZBED4	21.7	11.42	0.773361
FGFR2	20.69	19.595	0.666054
ALDH1B1	30.7	13.57	0.988368
ZBTB4	0	10.72	0.0557235
PIK3C2A	24.8	14.99	0.952774
ZC3H12C	15.59	15.1	0.325484
PRDM15	6.236	13.565	0.330229
VCAN	13.89	10.745	0.816346
TRIM2	0	20.9	0.0616913
HERC6	14.73	10.52	0.785618
ATHL1	14.57	0	0.864091
RIOK1	24.4	21.095	0.6942
OBSL1	29.3	9.9905	0.95054
HINFP	17.46	15.78	0.720208
SLC7A2	23.2	11.93	0.954205
PTPRS	16.78	11.345	0.583223
ELF1		18.16
NLRC5	16.51	9.1945	0.703282
POLI	0.4975	1.437	0.266377
PRDM10	9.615	17.545	0.278388
ECE1	18.18	18.96	0.508465
UBXN11	40	9.953	0.945074
WDR6	17.885	11.84	0.996612
HPS4		10.66
LAMA3	20.5	10.79	0.939288
SCAF1	27.175	12.65	0.897527
LZTR1	32	23	0.985218
SLC4A7	5.92	27.1	0.184219
KIAA1211	15.65	9.35	0.9078
STK11	27.5	26.4	0.635269
BRCA1	10.29	10.92	0.423412
P4HA2	24.15	21.9	0.630371
EDC4		15.92
LOXL2	16.81	14.18	0.670946
MYLK	12.7	9.569	0.715444
INPP5B	18	16.385	0.5
GPATCH8	0	15.39	0.0913305
ITGA2	7.525	8.357	0.217753
PLD2	22	13.455	0.897084
LRRC8A	9.6535	0.185	0.786892
PHLPP1	18.275	13.9	0.901015
MLLT4	28	22.1	0.5
SAFB	17.45	17.77	0.546907
DEAF1	0	11.9305	0.10169
FAT4	16.15	12.49	0.911765
SH3TC1	30.7	5.785	0.954604
FNDC1	7.63	12.075	0.362671
TLN1	24.4	17.96	0.956694
KIAA2026	13.1	11.99	0.434309
YTHDC2	23.4	17.31	0.85051
MEN1		21.1
OSBPL5	12.41	8.9	0.873134
TCOF1	10.13	9.8175	0.857983
CARS	13.97	13.18	0.658249
DDX60	18.74	9.72	0.956341
MALT1	22.3	17.605	0.826792
XPC		15.28
FAT2	18.04	13.9	0.641396
PTPRG	16.38	20.6	0.343444
RGS3	21.3	17.435	0.906082
SFMBT1	27.785	21.9	0.751932
RXRA	15.175	18.57	0.224329
KANK1	19.1	14.005	0.720689
TRANK1	6.386	11.55	0.276219
CES2	10.8	4.459	0.648049
HPS1	20	15.455	0.693867
CTBP2	0	12.345	0.129709
RREB1	22.515	10.97	0.878738
AGTPBP1	23.085	15.97	0.595293
DICER1	22.175	17.6	0.775659
APCDD1	9.869	13.03	0.153761
SFXN4	8.7595	0.003	0.67001
NCOR2	10.35	11.86	0.327975
ADAMTS2	15.61	6.065	0.837421
ZCCHC2	40	11.2245	0.950725
RAP1GAP2	7.993	13.435	0.452431
QARS	19.83	14.265	0.856601
KIAA0922	19.54	8.209	0.875702
COL4A2	14.92	11.7	0.957663
CSPG4	13.05	10.0095	0.305209
KLHL18	20.906	16.5	0.826586
TRIM16	7.847	9.712	0.421595
PDE4DIP		12.915
EVPL	19.55	10.41	0.936261
GRK5	18.915	17.95	0.630704
UBE4B	29	21.165	0.756546
KLHL36		0
EPS8L2	1.756	18.44	0.222241
F2R	13.59	2.197	0.946853
PTK2B	24.1	5.425	0.935632
DOCK5	13.91	20.835	0.0580418
SPTAN1	21.25	21.5	0.758314
TNPO1	23.93	20.6	0.513677
PLEKHA5	17.372	23.2	0.33893
B2M	40	40	0.759147
IL6ST	40	18.46	0.93276
MLH1	18.37	34	0.075245
NDOR1	24.5	8.677	0.562205
DIP2C	6.96	18.69	0.224536
DOPEY2	7.475	13.37	0.213858
KIF13B	27.5	17.23	0.921097
TJP1	20.9	17.89	0.715692
TNRC6B	15.46	18	0.431353
RHOBTB2	26.26	13.26	0.952184
FAM160B1	19.18	16.855	0.747861
DIS3	28.75	18.47	0.86654
MGA	24.5	16.045	0.973074
AMBRA1	31.45	16.31	0.900199
CNDP2	13.11	10.95	0.40876
ACTN1		14.905
SREBF1	20.8	11.62	0.906775
TRPV2	11.45	6.035	0.676757
LAMA4	15.42	14.72	0.516058
AP1G1	21.6	16.03	0.886723
CYFIP1	11.13	0	0.572501
SIK3	31	20.7	0.740233
IKBKB	29.7	12.54	0.815029
PIKFYVE	19.175	16.035	0.764656
PARP4	10.402	9.248	0.735268
SPRY1	14.455	13.535	0.633177
COL7A1	13.831	9.038	0.872617
PPRC1	12.87	13.545	0.73949
TRIM8	22.15	9.018	0.96402
PTPRJ	2.662	14.38	0.158767
MAML2		14.585
DMBT1	20.0065	12.26	0.787843
ITGA1	12.7875	18.12	0.225771
NBEA	23	16.42	0.979534
PCLO		11.82
AP3D1	32	6.345	0.964144
CSDE1		19.08
TECPR2	25.3	16.81	0.652754
HIVEP1	17.14	12.585	0.749102
WHSC1	23.3	20.65	0.649239
IPO11	13.5	15.8	0.323314
MAP2K4	40	18.34	0.981116
MTMR3	13.8	9.677	0.72514
ARID1B	40	16.045	0.927655
MLLT10	36	18.5	0.917814
SEMA3F	11.19	1.912	0.632621
FAT1	19.77	14.7	0.831606
CREBBP	20.4	15.47	0.979169
ATP11A	19.855	9.114	0.982746
CENPE	15.53	9.608	0.623187
SORBS2	17.89	17.26	0.607787
PLCB1	18.41	17.87	0.587024
MYO5B	17.75	18.46	0.515758
FANCD2	22.298	9.6905	0.835232
C3	14.975	12.66	0.544126
MKI67	8.276	9.2165	0.505305
SEMA6A	9.07	15.315	0.476419
DDX41	27.8	14.87	0.900241
ZBTB7A		12.45
PVRL1	16.62	4.686	0.887035
GSR	11.6	16.22	0.416667
GPS2	40	40	0.872555
LAMB2	16.14	14.985	0.779607
CUBN	18.42	10.95	0.994047
ENC1	20.015	16.41	0.921109
MTOR	20.45	20.2	0.487055
VCAM1	12.42	10.29	0.648054
PASK	22.7	9.106	0.885688
RBM47	12.44	13.88	0.4116
OTUD4	21	16.7	0.850148
FLI1	27.9	4.873	0.981882
PPP6C	17.94	17.79	0.757781
DOT1L	16.57	11.55	0.828074
LATS2	7.055	17.03	0.316219
TSC2	16.8	9.6285	0.671293
FBXO30	23.7	11.3	0.928249
ZFP36L1	22	15.915	0.831251
VCL	33	22.1	0.99638
FAM65A	20.98	14.73	0.718874
EDIL3	0	16.72	0.0639021
NCOR1	14.8	15.25	0.762479
JAK1	33	15.91	0.829566
SUPT6H	28.2	17.87	0.849408
PALLD	13.47	12.32	0.755376
MYO19		13.39
MYH9	25	22.05	0.819741
MED23	16.52	20.6	0.408761
SLCO3A1	8.05	13.43	0.377198
STK10	16.78	15.905	0.78933
KIAA1217	25.15	15.26	0.977406
APC	40	18.635	0.904941
ITGB2	7.28	9.285	0.480887
CABIN1	34	15.57	0.929656
SFI1	40	13.77	0.942493
SETD2	29.2	21.15	0.750058
C10orf76	0	15.06	0.228807
AXIN1	7.245	16.9	0.0926815
COL6A2	15.7	9.626	0.959479
EVC	12.73	5.6035	0.881318
NLGN2	16.02	15.1	0.789232
JAG2	14.31	5.8	0.75263
VHL	12.73	24.4	0.4
RASA1	40	31	0.697457
TRAK1	27.2	15.01	0.926811
SLC26A6	15.675	7.796	0.92887
DEPDC5	32.5	21.3	0.949344
IRF2	26.415	20.03	0.662954
CDH11	25.7	14.46	0.972844
PSIP1	30.15	20.8	0.81059
ATG7	28.7	0	0.951427
PLXNB2	16.895	9.514	0.937666
ANKRD11	16.0675	9.977	0.876803
SMAD4	29.4	19.51	0.908631
KEAP1	26.7	18.72	0.988692
USP54	40	14.345	0.955207
CYLD	40	17.965	0.98735
SMARCA4	40	18.48	0.999604
TGFBR2	40	21.7	0.999201
BRD7	40	13.89	0.97562
NSD1	23.8	11.14	0.998038
RB1	40	29	0.705387
BAP1	36	12.01	0.991838
TSC1	35	13.92	0.990882
FUBP1	19.34	17.27	0.769237
PBRM1	32.1	26.45	0.702366
NF1	40	26.55	0.962183
CDH1	6.335	12.885	0.130842
CIC	27.95	16.295	0.746673
